# Supplementary material
Source: publisher figshare collection journal article supplement (https://acs.figshare.com/ndownloader/files/5887431)
Supplement: Supplementary file 1 [file 5887431]

 
data_TAz3
 
_audit_creation_method            'SHELXL-2014/7'
_shelx_SHELXL_version_number      '2014/7'
_chemical_name_systematic         ?
_chemical_name_common             ?
_chemical_melting_point           ?
_chemical_formula_moiety          'C30 H20'
_chemical_formula_sum
 'C30 H20' 
_chemical_formula_weight          380.46

loop_
 _atom_type_symbol
 _atom_type_description
 _atom_type_scat_dispersion_real
 _atom_type_scat_dispersion_imag
 _atom_type_scat_source
 'C'  'C'   0.0033   0.0016
 'International Tables Vol C Tables 4.2.6.8 and 6.1.1.4'
 'H'  'H'   0.0000   0.0000
 'International Tables Vol C Tables 4.2.6.8 and 6.1.1.4'
 
_space_group_crystal_system       monoclinic
_space_group_IT_number            7
_space_group_name_H-M_alt         'P c'
_space_group_name_Hall            'P -2yc'
 
_shelx_space_group_comment
;
The symmetry employed for this shelxl refinement is uniquely defined
by the following loop, which should always be used as a source of
symmetry information in preference to the above space-group names.
They are only intended as comments.
;
 
loop_
 _space_group_symop_operation_xyz
 'x, y, z'
 'x, -y, z+1/2'
 
_cell_length_a                    5.9450(8)
_cell_length_b                    7.2440(11)
_cell_length_c                    40.577(7)
_cell_angle_alpha                 90
_cell_angle_beta                  91.345(14)
_cell_angle_gamma                 90
_cell_volume                      1747.0(5)
_cell_formula_units_Z             4
_cell_measurement_temperature     93
_cell_measurement_reflns_used     5868
_cell_measurement_theta_min       2.8970
_cell_measurement_theta_max       29.8920
 
_exptl_crystal_description        'platelet'
_exptl_crystal_colour             'blue'
_exptl_crystal_density_meas       ?
_exptl_crystal_density_method     ?
_exptl_crystal_density_diffrn     1.447          
_exptl_crystal_F_000              800
_exptl_transmission_factor_min    ?
_exptl_transmission_factor_max    ?
_exptl_crystal_size_max           0.080
_exptl_crystal_size_mid           0.050
_exptl_crystal_size_min           0.030
_exptl_absorpt_coefficient_mu     0.082
_shelx_estimated_absorpt_T_min    0.993
_shelx_estimated_absorpt_T_max    0.998
_exptl_absorpt_correction_T_min                   0.66352
_exptl_absorpt_correction_T_max                   1.00000
_exptl_absorpt_correction_type            multi-scan
_exptl_absorpt_process_details
;
CrysAlisPro 1.171.38.41 (Rigaku Oxford Diffraction, 2015)
Empirical absorption correction using spherical harmonics,
 implemented in SCALE3 ABSPACK scaling algorithm.
;
_oxdiff_exptl_absorpt_empirical_full_min           0.833
_oxdiff_exptl_absorpt_empirical_full_max           1.306
_oxdiff_exptl_absorpt_empirical_details
;
Empirical correction (ABSPACK) includes:
- Absorption correction using spherical harmonics
- Frame scaling
- Detector area scaling
;
_diffrn_ambient_temperature       93
_diffrn_radiation_wavelength      0.71073
_diffrn_radiation_type            MoK\a
_diffrn_source                    'Rotating Anode'
_diffrn_measurement_device_type   'Rigaku Saturn 70 CCD area detector'
_diffrn_measurement_method        '\w'
_diffrn_detector_area_resol_mean  28.5714
_diffrn_reflns_number             23776
_diffrn_reflns_av_unetI/netI      0.1206
_diffrn_reflns_av_R_equivalents   0.0968
_diffrn_reflns_limit_h_min        -7
_diffrn_reflns_limit_h_max        7
_diffrn_reflns_limit_k_min        -9
_diffrn_reflns_limit_k_max        9
_diffrn_reflns_limit_l_min        -52
_diffrn_reflns_limit_l_max        52
_diffrn_reflns_theta_min          4.015
_diffrn_reflns_theta_max          27.482
_diffrn_reflns_theta_full         25.242
_diffrn_measured_fraction_theta_max   0.997
_diffrn_measured_fraction_theta_full  0.996
_diffrn_reflns_Laue_measured_fraction_max    0.997
_diffrn_reflns_Laue_measured_fraction_full   0.996
_diffrn_reflns_point_group_measured_fraction_max   0.996
_diffrn_reflns_point_group_measured_fraction_full  0.996
_reflns_number_total              7991
_reflns_number_gt                 4831
_reflns_threshold_expression      'I > 2\s(I)'
_reflns_Friedel_coverage          0.997
_reflns_Friedel_fraction_max      0.996
_reflns_Friedel_fraction_full     0.996
 
_reflns_special_details
;
 Reflections were merged by SHELXL according to the crystal
 class for the calculation of statistics and refinement.
 
 _reflns_Friedel_fraction is defined as the number of unique
 Friedel pairs measured divided by the number that would be
 possible theoretically, ignoring centric projections and
 systematic absences.
;
 
_computing_data_collection        'CrysAlisPro 1.171.38.41 (Rigaku OD, 2015)'
_computing_cell_refinement        'CrysAlisPro 1.171.38.41 (Rigaku OD, 2015)'
_computing_data_reduction         'CrysAlisPro 1.171.38.41 (Rigaku OD, 2015)'
_computing_structure_solution     'SHELXT (Sheldrick, 2015)'
_computing_structure_refinement   'SHELXL-2014 (Sheldrick, 2015)'
_computing_molecular_graphics     'ORTEP-3 for Windows (Farrugia, 2012)'
_computing_publication_material   'Yadokari-XG (Wakita, Nemoto et al., 2009)'
_publ_section_references
;
Wakita, K. (2001). Yadokari-XG. Software for Crystal Structure Analyses.
Release of Software (Yadokari-XG 2009) for Crystal Structure Analyses,
Kabuto, C., Akine, S., Nemoto, T. and Kwon, E. (2009). J. Cryst. Soc. Jpn.,
51, 218-224.
;
_refine_special_details           ?
_refine_ls_structure_factor_coef  Fsqd
_refine_ls_matrix_type            full
_refine_ls_weighting_scheme       calc
_refine_ls_weighting_details
'w=1/[\s^2^(Fo^2^)+(0.0507P)^2^] where P=(Fo^2^+2Fc^2^)/3'
_atom_sites_solution_primary      direct
_atom_sites_solution_secondary    difmap
_atom_sites_solution_hydrogens    geom
_refine_ls_hydrogen_treatment     constr
_refine_ls_extinction_method      none
_refine_ls_extinction_coef        .
_refine_ls_abs_structure_details  .
_refine_ls_abs_structure_Flack    .
_chemical_absolute_configuration  ?
_refine_ls_number_reflns          7991
_refine_ls_number_parameters      541
_refine_ls_number_restraints      2
_refine_ls_R_factor_all           0.1290
_refine_ls_R_factor_gt            0.0678
_refine_ls_wR_factor_ref          0.1421
_refine_ls_wR_factor_gt           0.1212
_refine_ls_goodness_of_fit_ref    0.985
_refine_ls_restrained_S_all       0.985
_refine_ls_shift/su_max           0.000
_refine_ls_shift/su_mean          0.000
 
loop_
 _atom_site_label
 _atom_site_type_symbol
 _atom_site_fract_x
 _atom_site_fract_y
 _atom_site_fract_z
 _atom_site_U_iso_or_equiv
 _atom_site_adp_type
 _atom_site_occupancy
 _atom_site_site_symmetry_order  
 _atom_site_calc_flag
 _atom_site_refinement_flags_posn
 _atom_site_refinement_flags_adp
 _atom_site_refinement_flags_occupancy
 _atom_site_disorder_assembly
 _atom_site_disorder_group
C1 C 0.3553(9) 0.5439(7) 0.30217(14) 0.0220(13) Uani 1 1 d . . . . .
H1 H 0.2311 0.6033 0.2915 0.026 Uiso 1 1 calc R U . . .
C2 C 0.5458(10) 0.4837(8) 0.28730(14) 0.0258(14) Uani 1 1 d . . . . .
H2 H 0.5745 0.4962 0.2645 0.031 Uiso 1 1 calc R U . . .
C3 C 0.6895(10) 0.4028(8) 0.30987(15) 0.0234(14) Uani 1 1 d . . . . .
H3 H 0.8311 0.3492 0.3053 0.028 Uiso 1 1 calc R U . . .
C4 C 0.6854(9) 0.3559(7) 0.36887(14) 0.0199(13) Uani 1 1 d . . . . .
H4 H 0.8296 0.3004 0.3675 0.024 Uiso 1 1 calc R U . . .
C5 C 0.6039(9) 0.3655(7) 0.39967(13) 0.0185(12) Uani 1 1 d . . . . .
H5 H 0.7033 0.3224 0.4166 0.022 Uiso 1 1 calc R U . . .
C6 C 0.3979(9) 0.4285(7) 0.41030(13) 0.0161(12) Uani 1 1 d . . . . .
C7 C 0.2300(9) 0.5051(7) 0.39128(13) 0.0174(12) Uani 1 1 d . . . . .
H7 H 0.0999 0.5411 0.4028 0.021 Uiso 1 1 calc R U . . .
C8 C 0.2214(9) 0.5375(7) 0.35836(14) 0.0207(13) Uani 1 1 d . . . . .
H8 H 0.0859 0.5928 0.3503 0.025 Uiso 1 1 calc R U . . .
C9 C 0.3748(9) 0.5034(7) 0.33533(14) 0.0213(13) Uani 1 1 d . . . . .
C10 C 0.5948(10) 0.4122(8) 0.34005(15) 0.0220(14) Uani 1 1 d . . . . .
C11 C 0.0529(10) 0.3011(8) 0.54328(14) 0.0189(14) Uani 1 1 d . . . . .
H11 H -0.0892 0.2436 0.5459 0.023 Uiso 1 1 calc R U . . .
C12 C 0.1904(10) 0.3663(8) 0.56845(15) 0.0191(14) Uani 1 1 d . . . . .
C13 C 0.3843(10) 0.4335(8) 0.55519(14) 0.0179(14) Uani 1 1 d . . . . .
H13 H 0.5080 0.4833 0.5675 0.022 Uiso 1 1 calc R U . . .
C14 C 0.5277(10) 0.4739(8) 0.49994(14) 0.0181(14) Uani 1 1 d . . . . .
H14 H 0.6618 0.5228 0.5097 0.022 Uiso 1 1 calc R U . . .
C15 C 0.5223(10) 0.4714(8) 0.46677(14) 0.0176(14) Uani 1 1 d . . . . .
H15 H 0.6527 0.5192 0.4567 0.021 Uiso 1 1 calc R U . . .
C16 C 0.3571(9) 0.4102(8) 0.44532(14) 0.0135(13) Uani 1 1 d . . . . .
C17 C 0.1546(10) 0.3335(8) 0.45379(15) 0.0194(15) Uani 1 1 d . . . . .
H17 H 0.0590 0.3016 0.4356 0.023 Uiso 1 1 calc R U . . .
C18 C 0.0686(10) 0.2958(8) 0.48356(14) 0.0168(14) Uani 1 1 d . . . . .
H18 H -0.0727 0.2345 0.4830 0.020 Uiso 1 1 calc R U . . .
C19 C 0.1537(10) 0.3323(8) 0.51404(15) 0.0198(14) Uani 1 1 d . . . . .
C20 C 0.3722(10) 0.4179(8) 0.52151(16) 0.0198(15) Uani 1 1 d . . . . .
C21 C -0.0559(10) 0.3077(8) 0.61641(14) 0.0211(15) Uani 1 1 d . . . . .
H21 H -0.1790 0.2514 0.6049 0.025 Uiso 1 1 calc R U . . .
C22 C 0.1389(9) 0.3725(8) 0.60219(14) 0.0179(14) Uani 1 1 d . . . . .
C23 C 0.2771(10) 0.4447(8) 0.62633(14) 0.0211(14) Uani 1 1 d . . . . .
H23 H 0.4214 0.4970 0.6230 0.025 Uiso 1 1 calc R U . . .
C24 C 0.2597(10) 0.4880(8) 0.68528(15) 0.0220(14) Uani 1 1 d . . . . .
H24 H 0.4036 0.5447 0.6846 0.026 Uiso 1 1 calc R U . . .
C25 C 0.1693(10) 0.4772(9) 0.71566(14) 0.0225(14) Uani 1 1 d . . . . .
H25 H 0.2561 0.5288 0.7333 0.027 Uiso 1 1 calc R U . . .
C26 C -0.0316(10) 0.4009(9) 0.72375(16) 0.0263(15) Uani 1 1 d . . . . .
H26 H -0.0630 0.4054 0.7466 0.032 Uiso 1 1 calc R U . . .
C27 C -0.1942(11) 0.3197(8) 0.70480(15) 0.0217(15) Uani 1 1 d . . . . .
H27 H -0.3205 0.2741 0.7162 0.026 Uiso 1 1 calc R U . . .
C28 C -0.1996(10) 0.2953(8) 0.67182(15) 0.0240(15) Uani 1 1 d . . . . .
H28 H -0.3329 0.2403 0.6630 0.029 Uiso 1 1 calc R U . . .
C29 C -0.0418(10) 0.3381(8) 0.64954(15) 0.0213(15) Uani 1 1 d . . . . .
C30 C 0.1747(10) 0.4297(8) 0.65576(15) 0.0209(14) Uani 1 1 d . . . . .
C31 C 0.8606(10) 0.9303(8) 0.29015(14) 0.0240(14) Uani 1 1 d . . . . .
H31 H 0.7348 0.8847 0.2778 0.029 Uiso 1 1 calc R U . . .
C32 C 1.0480(10) 1.0096(8) 0.27727(15) 0.0272(14) Uani 1 1 d . . . . .
H32 H 1.0727 1.0274 0.2544 0.033 Uiso 1 1 calc R U . . .
C33 C 1.1949(10) 1.0596(8) 0.30229(15) 0.0251(14) Uani 1 1 d . . . . .
H33 H 1.3367 1.1176 0.2997 0.030 Uiso 1 1 calc R U . . .
C34 C 1.1928(10) 1.0339(7) 0.36173(14) 0.0211(14) Uani 1 1 d . . . . .
H34 H 1.3382 1.0883 0.3623 0.025 Uiso 1 1 calc R U . . .
C35 C 1.1115(9) 0.9917(7) 0.39163(13) 0.0172(12) Uani 1 1 d . . . . .
H35 H 1.2088 1.0209 0.4098 0.021 Uiso 1 1 calc R U . . .
C36 C 0.9098(9) 0.9131(7) 0.39987(13) 0.0184(13) Uani 1 1 d . . . . .
C37 C 0.7418(8) 0.8546(7) 0.37839(12) 0.0171(12) Uani 1 1 d . . . . .
H37 H 0.6139 0.8020 0.3884 0.021 Uiso 1 1 calc R U . . .
C38 C 0.7333(9) 0.8616(7) 0.34510(14) 0.0220(13) Uani 1 1 d . . . . .
H38 H 0.6001 0.8123 0.3351 0.026 Uiso 1 1 calc R U . . .
C39 C 0.8842(9) 0.9277(7) 0.32387(14) 0.0190(13) Uani 1 1 d . . . . .
C40 C 1.1026(10) 1.0120(7) 0.33158(14) 0.0207(13) Uani 1 1 d . . . . .
C41 C 0.5656(10) 0.9425(8) 0.53439(15) 0.0216(15) Uani 1 1 d . . . . .
H41 H 0.4224 0.9960 0.5380 0.026 Uiso 1 1 calc R U . . .
C42 C 0.7051(10) 0.8701(8) 0.55859(16) 0.0203(14) Uani 1 1 d . . . . .
C43 C 0.8994(10) 0.8077(8) 0.54359(14) 0.0187(14) Uani 1 1 d . . . . .
H43 H 1.0242 0.7522 0.5548 0.022 Uiso 1 1 calc R U . . .
C44 C 1.0375(10) 0.7978(8) 0.48782(14) 0.0167(14) Uani 1 1 d . . . . .
H44 H 1.1710 0.7415 0.4963 0.020 Uiso 1 1 calc R U . . .
C45 C 1.0315(10) 0.8247(8) 0.45483(15) 0.0188(15) Uani 1 1 d . . . . .
H45 H 1.1635 0.7883 0.4438 0.023 Uiso 1 1 calc R U . . .
C46 C 0.8648(10) 0.8961(7) 0.43506(14) 0.0158(13) Uani 1 1 d . . . . .
C47 C 0.6593(10) 0.9622(8) 0.44537(15) 0.0191(14) Uani 1 1 d . . . . .
H47 H 0.5621 1.0035 0.4280 0.023 Uiso 1 1 calc R U . . .
C48 C 0.5731(10) 0.9783(8) 0.47539(14) 0.0191(14) Uani 1 1 d . . . . .
H48 H 0.4288 1.0342 0.4762 0.023 Uiso 1 1 calc R U . . .
C49 C 0.6630(10) 0.9261(8) 0.50446(15) 0.0180(14) Uani 1 1 d . . . . .
C50 C 0.8835(10) 0.8384(8) 0.51041(15) 0.0177(14) Uani 1 1 d . . . . .
C51 C 0.4589(10) 0.9355(9) 0.60569(15) 0.0216(15) Uani 1 1 d . . . . .
H51 H 0.3355 0.9865 0.5935 0.026 Uiso 1 1 calc R U . . .
C52 C 0.6562(10) 0.8653(8) 0.59237(14) 0.0189(14) Uani 1 1 d . . . . .
C53 C 0.7922(10) 0.8011(8) 0.61756(14) 0.0197(14) Uani 1 1 d . . . . .
H53 H 0.9355 0.7454 0.6151 0.024 Uiso 1 1 calc R U . . .
C54 C 0.7730(10) 0.7931(8) 0.67691(15) 0.0235(15) Uani 1 1 d . . . . .
H54 H 0.9171 0.7363 0.6774 0.028 Uiso 1 1 calc R U . . .
C55 C 0.6841(10) 0.8245(8) 0.70686(14) 0.0218(14) Uani 1 1 d . . . . .
H55 H 0.7713 0.7831 0.7253 0.026 Uiso 1 1 calc R U . . .
C56 C 0.4828(10) 0.9090(9) 0.71387(16) 0.0267(15) Uani 1 1 d . . . . .
H56 H 0.4539 0.9217 0.7367 0.032 Uiso 1 1 calc R U . . .
C57 C 0.3196(10) 0.9767(8) 0.69330(15) 0.0233(16) Uani 1 1 d . . . . .
H57 H 0.1935 1.0305 0.7036 0.028 Uiso 1 1 calc R U . . .
C58 C 0.3146(10) 0.9770(8) 0.65986(15) 0.0235(15) Uani 1 1 d . . . . .
H58 H 0.1810 1.0247 0.6498 0.028 Uiso 1 1 calc R U . . .
C59 C 0.4737(10) 0.9185(8) 0.63885(15) 0.0192(14) Uani 1 1 d . . . . .
C60 C 0.6885(10) 0.8300(8) 0.64671(15) 0.0202(14) Uani 1 1 d . . . . .
 
loop_
 _atom_site_aniso_label
 _atom_site_aniso_U_11
 _atom_site_aniso_U_22
 _atom_site_aniso_U_33
 _atom_site_aniso_U_23
 _atom_site_aniso_U_13
 _atom_site_aniso_U_12
C1 0.017(3) 0.021(3) 0.028(3) 0.000(2) -0.004(3) -0.005(2)
C2 0.024(3) 0.033(4) 0.020(3) -0.003(3) 0.000(3) -0.005(3)
C3 0.020(3) 0.018(3) 0.032(4) -0.002(3) 0.003(3) -0.006(3)
C4 0.017(3) 0.014(3) 0.029(4) -0.001(2) 0.002(3) -0.005(2)
C5 0.019(3) 0.017(3) 0.019(3) 0.003(2) -0.003(2) -0.004(2)
C6 0.011(3) 0.011(3) 0.026(3) 0.002(2) -0.002(2) -0.003(2)
C7 0.014(3) 0.015(3) 0.023(3) 0.002(2) 0.003(2) 0.000(2)
C8 0.016(3) 0.020(3) 0.026(3) -0.005(2) -0.001(3) 0.001(2)
C9 0.016(3) 0.019(3) 0.029(3) 0.000(3) -0.001(3) -0.006(2)
C10 0.019(3) 0.021(3) 0.027(4) -0.002(3) 0.002(3) -0.006(2)
C11 0.016(3) 0.018(3) 0.023(4) 0.001(3) 0.001(3) 0.001(3)
C12 0.017(3) 0.011(3) 0.030(4) 0.000(3) 0.000(3) 0.002(2)
C13 0.019(4) 0.018(3) 0.017(4) -0.002(3) -0.004(3) -0.002(2)
C14 0.014(3) 0.015(3) 0.025(4) 0.000(3) -0.002(3) 0.003(2)
C15 0.014(3) 0.017(3) 0.022(4) 0.003(3) 0.002(3) 0.001(2)
C16 0.014(3) 0.012(3) 0.014(3) 0.000(2) -0.003(3) 0.002(2)
C17 0.017(3) 0.016(3) 0.025(4) 0.000(3) -0.004(3) 0.003(3)
C18 0.019(4) 0.012(3) 0.019(4) -0.001(3) -0.003(3) 0.002(2)
C19 0.022(4) 0.014(3) 0.023(4) 0.004(3) -0.002(3) 0.006(3)
C20 0.013(3) 0.012(3) 0.034(4) 0.001(3) -0.003(3) 0.002(2)
C21 0.014(3) 0.023(4) 0.026(4) -0.002(3) -0.003(3) 0.001(3)
C22 0.020(4) 0.016(3) 0.018(3) 0.000(3) -0.006(3) 0.004(3)
C23 0.018(3) 0.020(3) 0.026(4) 0.003(3) 0.002(3) 0.002(3)
C24 0.018(3) 0.022(3) 0.026(4) -0.002(3) 0.000(3) 0.001(3)
C25 0.021(4) 0.034(4) 0.012(3) -0.003(3) -0.001(3) 0.001(3)
C26 0.023(4) 0.034(4) 0.022(4) 0.007(3) 0.000(3) 0.005(3)
C27 0.024(4) 0.019(4) 0.022(4) 0.003(3) 0.001(3) 0.000(3)
C28 0.018(4) 0.021(4) 0.033(4) -0.001(3) 0.002(3) 0.001(3)
C29 0.016(3) 0.022(3) 0.026(4) 0.005(3) -0.002(3) -0.003(3)
C30 0.021(4) 0.016(3) 0.026(4) 0.001(3) -0.003(3) 0.001(3)
C31 0.020(3) 0.027(3) 0.025(4) -0.002(3) -0.001(3) 0.004(2)
C32 0.026(3) 0.032(4) 0.023(3) 0.001(3) 0.004(3) 0.001(3)
C33 0.021(3) 0.023(3) 0.031(4) -0.004(3) 0.003(3) -0.004(3)
C34 0.013(3) 0.018(3) 0.032(4) -0.004(3) 0.003(3) 0.003(2)
C35 0.015(3) 0.017(3) 0.019(3) -0.002(2) 0.000(2) 0.003(2)
C36 0.015(3) 0.014(3) 0.027(3) -0.001(2) 0.001(2) 0.003(2)
C37 0.012(3) 0.017(3) 0.022(3) -0.002(2) 0.004(2) -0.001(2)
C38 0.020(3) 0.013(3) 0.033(4) 0.001(3) -0.001(3) 0.003(2)
C39 0.019(3) 0.015(3) 0.023(3) 0.002(2) 0.000(3) 0.003(2)
C40 0.021(3) 0.014(3) 0.027(4) -0.003(2) 0.004(3) 0.003(2)
C41 0.017(4) 0.022(4) 0.026(4) -0.001(3) 0.002(3) 0.000(3)
C42 0.014(3) 0.016(3) 0.031(4) 0.001(3) 0.001(3) -0.003(3)
C43 0.017(3) 0.017(3) 0.022(4) 0.000(3) 0.001(3) 0.001(3)
C44 0.015(3) 0.016(3) 0.019(4) 0.000(3) -0.002(3) 0.000(2)
C45 0.011(3) 0.014(3) 0.031(4) -0.003(3) 0.002(3) -0.001(2)
C46 0.019(3) 0.008(3) 0.021(3) -0.001(2) 0.002(3) -0.002(2)
C47 0.015(3) 0.013(3) 0.029(4) 0.001(3) -0.002(3) -0.002(2)
C48 0.017(3) 0.018(3) 0.023(4) 0.001(3) 0.004(3) -0.004(3)
C49 0.014(3) 0.013(3) 0.027(4) 0.000(3) -0.002(3) -0.006(3)
C50 0.016(3) 0.013(3) 0.025(4) 0.000(3) 0.002(3) -0.006(2)
C51 0.016(3) 0.022(4) 0.027(4) -0.002(3) -0.001(3) 0.000(2)
C52 0.023(4) 0.024(3) 0.010(3) -0.004(3) 0.003(3) -0.007(3)
C53 0.023(4) 0.014(3) 0.022(4) 0.001(3) -0.001(3) 0.000(3)
C54 0.016(3) 0.022(3) 0.033(4) 0.001(3) -0.002(3) 0.000(3)
C55 0.021(4) 0.028(4) 0.016(3) 0.000(3) 0.001(3) -0.001(3)
C56 0.028(4) 0.027(4) 0.025(4) -0.004(3) 0.004(3) -0.004(3)
C57 0.020(4) 0.019(4) 0.031(4) 0.005(3) 0.003(3) -0.001(3)
C58 0.022(4) 0.020(4) 0.028(4) 0.001(3) 0.001(3) -0.002(3)
C59 0.019(4) 0.017(3) 0.022(4) -0.001(3) 0.004(3) -0.003(3)
C60 0.017(3) 0.014(3) 0.029(4) 0.003(3) -0.001(3) -0.003(2)
 
_geom_special_details
;
 All esds (except the esd in the dihedral angle between two l.s. planes)
 are estimated using the full covariance matrix.  The cell esds are taken
 into account individually in the estimation of esds in distances, angles
 and torsion angles; correlations between esds in cell parameters are only
 used when they are defined by crystal symmetry.  An approximate (isotropic)
 treatment of cell esds is used for estimating esds involving l.s. planes.
;
 
loop_
 _geom_bond_atom_site_label_1
 _geom_bond_atom_site_label_2
 _geom_bond_distance
 _geom_bond_site_symmetry_2
 _geom_bond_publ_flag
C1 C2 1.367(8) . ?
C1 C9 1.379(7) . ?
C1 H1 0.9500 . ?
C2 C3 1.369(8) . ?
C2 H2 0.9500 . ?
C3 C10 1.361(8) . ?
C3 H3 0.9500 . ?
C4 C10 1.340(8) . ?
C4 C5 1.353(7) . ?
C4 H4 0.9500 . ?
C5 C6 1.385(7) . ?
C5 H5 0.9500 . ?
C6 C7 1.365(7) . ?
C6 C16 1.453(7) . ?
C7 C8 1.356(7) . ?
C7 H7 0.9500 . ?
C8 C9 1.344(7) . ?
C8 H8 0.9500 . ?
C9 C10 1.474(8) . ?
C11 C19 1.360(8) . ?
C11 C12 1.377(8) . ?
C11 H11 0.9500 . ?
C12 C13 1.373(8) . ?
C12 C22 1.411(8) . ?
C13 C20 1.372(8) . ?
C13 H13 0.9500 . ?
C14 C15 1.346(8) . ?
C14 C20 1.350(8) . ?
C14 H14 0.9500 . ?
C15 C16 1.370(8) . ?
C15 H15 0.9500 . ?
C16 C17 1.377(8) . ?
C17 C18 1.351(8) . ?
C17 H17 0.9500 . ?
C18 C19 1.351(8) . ?
C18 H18 0.9500 . ?
C19 C20 1.465(8) . ?
C21 C29 1.363(8) . ?
C21 C22 1.388(8) . ?
C21 H21 0.9500 . ?
C22 C23 1.367(8) . ?
C23 C30 1.357(8) . ?
C23 H23 0.9500 . ?
C24 C30 1.357(8) . ?
C24 C25 1.359(8) . ?
C24 H24 0.9500 . ?
C25 C26 1.363(8) . ?
C25 H25 0.9500 . ?
C26 C27 1.355(9) . ?
C26 H26 0.9500 . ?
C27 C28 1.349(8) . ?
C27 H27 0.9500 . ?
C28 C29 1.354(8) . ?
C28 H28 0.9500 . ?
C29 C30 1.465(8) . ?
C31 C32 1.368(8) . ?
C31 C39 1.372(8) . ?
C31 H31 0.9500 . ?
C32 C33 1.373(8) . ?
C32 H32 0.9500 . ?
C33 C40 1.365(8) . ?
C33 H33 0.9500 . ?
C34 C40 1.334(8) . ?
C34 C35 1.352(7) . ?
C34 H34 0.9500 . ?
C35 C36 1.376(7) . ?
C35 H35 0.9500 . ?
C36 C37 1.377(7) . ?
C36 C46 1.464(7) . ?
C37 C38 1.351(7) . ?
C37 H37 0.9500 . ?
C38 C39 1.347(7) . ?
C38 H38 0.9500 . ?
C39 C40 1.462(8) . ?
C41 C49 1.363(8) . ?
C41 C42 1.375(8) . ?
C41 H41 0.9500 . ?
C42 C43 1.393(8) . ?
C42 C52 1.408(8) . ?
C43 C50 1.366(8) . ?
C43 H43 0.9500 . ?
C44 C50 1.343(8) . ?
C44 C45 1.353(8) . ?
C44 H44 0.9500 . ?
C45 C46 1.363(8) . ?
C45 H45 0.9500 . ?
C46 C47 1.386(8) . ?
C47 C48 1.338(8) . ?
C47 H47 0.9500 . ?
C48 C49 1.338(8) . ?
C48 H48 0.9500 . ?
C49 C50 1.471(8) . ?
C51 C59 1.352(8) . ?
C51 C52 1.399(8) . ?
C51 H51 0.9500 . ?
C52 C53 1.370(8) . ?
C53 C60 1.363(8) . ?
C53 H53 0.9500 . ?
C54 C60 1.340(8) . ?
C54 C55 1.356(8) . ?
C54 H54 0.9500 . ?
C55 C56 1.380(9) . ?
C55 H55 0.9500 . ?
C56 C57 1.357(8) . ?
C56 H56 0.9500 . ?
C57 C58 1.357(8) . ?
C57 H57 0.9500 . ?
C58 C59 1.356(8) . ?
C58 H58 0.9500 . ?
C59 C60 1.458(8) . ?
 
loop_
 _geom_angle_atom_site_label_1
 _geom_angle_atom_site_label_2
 _geom_angle_atom_site_label_3
 _geom_angle
 _geom_angle_site_symmetry_1
 _geom_angle_site_symmetry_3
 _geom_angle_publ_flag
C2 C1 C9 108.1(5) . . ?
C2 C1 H1 125.9 . . ?
C9 C1 H1 125.9 . . ?
C1 C2 C3 110.6(5) . . ?
C1 C2 H2 124.7 . . ?
C3 C2 H2 124.7 . . ?
C10 C3 C2 108.4(6) . . ?
C10 C3 H3 125.8 . . ?
C2 C3 H3 125.8 . . ?
C10 C4 C5 130.2(6) . . ?
C10 C4 H4 114.9 . . ?
C5 C4 H4 114.9 . . ?
C4 C5 C6 130.0(5) . . ?
C4 C5 H5 115.0 . . ?
C6 C5 H5 115.0 . . ?
C7 C6 C5 126.7(5) . . ?
C7 C6 C16 117.0(5) . . ?
C5 C6 C16 116.3(5) . . ?
C8 C7 C6 129.6(5) . . ?
C8 C7 H7 115.2 . . ?
C6 C7 H7 115.2 . . ?
C9 C8 C7 130.0(5) . . ?
C9 C8 H8 115.0 . . ?
C7 C8 H8 115.0 . . ?
C8 C9 C1 126.6(5) . . ?
C8 C9 C10 127.4(5) . . ?
C1 C9 C10 106.0(5) . . ?
C4 C10 C3 127.2(6) . . ?
C4 C10 C9 126.0(6) . . ?
C3 C10 C9 106.8(5) . . ?
C19 C11 C12 108.9(6) . . ?
C19 C11 H11 125.5 . . ?
C12 C11 H11 125.5 . . ?
C13 C12 C11 108.7(6) . . ?
C13 C12 C22 124.9(6) . . ?
C11 C12 C22 126.3(6) . . ?
C20 C13 C12 109.7(6) . . ?
C20 C13 H13 125.2 . . ?
C12 C13 H13 125.2 . . ?
C15 C14 C20 130.1(6) . . ?
C15 C14 H14 115.0 . . ?
C20 C14 H14 115.0 . . ?
C14 C15 C16 129.8(6) . . ?
C14 C15 H15 115.1 . . ?
C16 C15 H15 115.1 . . ?
C15 C16 C17 126.1(6) . . ?
C15 C16 C6 117.3(5) . . ?
C17 C16 C6 116.6(5) . . ?
C18 C17 C16 131.0(6) . . ?
C18 C17 H17 114.5 . . ?
C16 C17 H17 114.5 . . ?
C17 C18 C19 129.6(6) . . ?
C17 C18 H18 115.2 . . ?
C19 C18 H18 115.2 . . ?
C18 C19 C11 127.1(6) . . ?
C18 C19 C20 125.7(6) . . ?
C11 C19 C20 107.3(6) . . ?
C14 C20 C13 126.9(6) . . ?
C14 C20 C19 127.6(6) . . ?
C13 C20 C19 105.4(6) . . ?
C29 C21 C22 108.8(6) . . ?
C29 C21 H21 125.6 . . ?
C22 C21 H21 125.6 . . ?
C23 C22 C21 109.0(5) . . ?
C23 C22 C12 124.5(6) . . ?
C21 C22 C12 126.5(5) . . ?
C30 C23 C22 109.0(6) . . ?
C30 C23 H23 125.5 . . ?
C22 C23 H23 125.5 . . ?
C30 C24 C25 129.5(6) . . ?
C30 C24 H24 115.3 . . ?
C25 C24 H24 115.3 . . ?
C24 C25 C26 127.6(6) . . ?
C24 C25 H25 116.2 . . ?
C26 C25 H25 116.2 . . ?
C27 C26 C25 131.0(6) . . ?
C27 C26 H26 114.5 . . ?
C25 C26 H26 114.5 . . ?
C28 C27 C26 128.3(7) . . ?
C28 C27 H27 115.9 . . ?
C26 C27 H27 115.9 . . ?
C27 C28 C29 129.2(6) . . ?
C27 C28 H28 115.4 . . ?
C29 C28 H28 115.4 . . ?
C28 C29 C21 126.5(6) . . ?
C28 C29 C30 127.5(6) . . ?
C21 C29 C30 106.1(5) . . ?
C24 C30 C23 125.9(6) . . ?
C24 C30 C29 126.9(6) . . ?
C23 C30 C29 107.2(5) . . ?
C32 C31 C39 108.7(5) . . ?
C32 C31 H31 125.6 . . ?
C39 C31 H31 125.6 . . ?
C31 C32 C33 109.7(5) . . ?
C31 C32 H32 125.1 . . ?
C33 C32 H32 125.1 . . ?
C40 C33 C32 108.4(5) . . ?
C40 C33 H33 125.8 . . ?
C32 C33 H33 125.8 . . ?
C40 C34 C35 130.7(5) . . ?
C40 C34 H34 114.6 . . ?
C35 C34 H34 114.6 . . ?
C34 C35 C36 130.1(5) . . ?
C34 C35 H35 115.0 . . ?
C36 C35 H35 115.0 . . ?
C35 C36 C37 126.6(5) . . ?
C35 C36 C46 116.9(5) . . ?
C37 C36 C46 116.4(5) . . ?
C38 C37 C36 129.1(5) . . ?
C38 C37 H37 115.4 . . ?
C36 C37 H37 115.4 . . ?
C39 C38 C37 130.0(5) . . ?
C39 C38 H38 115.0 . . ?
C37 C38 H38 115.0 . . ?
C38 C39 C31 126.1(5) . . ?
C38 C39 C40 127.8(5) . . ?
C31 C39 C40 106.1(5) . . ?
C34 C40 C33 127.4(6) . . ?
C34 C40 C39 125.6(5) . . ?
C33 C40 C39 107.0(5) . . ?
C49 C41 C42 110.0(6) . . ?
C49 C41 H41 125.0 . . ?
C42 C41 H41 125.0 . . ?
C41 C42 C43 107.7(6) . . ?
C41 C42 C52 124.7(6) . . ?
C43 C42 C52 127.6(6) . . ?
C50 C43 C42 109.8(6) . . ?
C50 C43 H43 125.1 . . ?
C42 C43 H43 125.1 . . ?
C50 C44 C45 129.9(6) . . ?
C50 C44 H44 115.1 . . ?
C45 C44 H44 115.1 . . ?
C44 C45 C46 129.7(6) . . ?
C44 C45 H45 115.1 . . ?
C46 C45 H45 115.1 . . ?
C45 C46 C47 126.0(6) . . ?
C45 C46 C36 117.3(5) . . ?
C47 C46 C36 116.7(5) . . ?
C48 C47 C46 131.7(6) . . ?
C48 C47 H47 114.2 . . ?
C46 C47 H47 114.2 . . ?
C47 C48 C49 128.6(6) . . ?
C47 C48 H48 115.7 . . ?
C49 C48 H48 115.7 . . ?
C48 C49 C41 126.3(6) . . ?
C48 C49 C50 127.0(6) . . ?
C41 C49 C50 106.7(5) . . ?
C44 C50 C43 127.2(6) . . ?
C44 C50 C49 127.0(6) . . ?
C43 C50 C49 105.8(5) . . ?
C59 C51 C52 108.4(5) . . ?
C59 C51 H51 125.8 . . ?
C52 C51 H51 125.8 . . ?
C53 C52 C51 108.7(5) . . ?
C53 C52 C42 127.1(6) . . ?
C51 C52 C42 124.2(5) . . ?
C60 C53 C52 109.0(6) . . ?
C60 C53 H53 125.5 . . ?
C52 C53 H53 125.5 . . ?
C60 C54 C55 129.8(6) . . ?
C60 C54 H54 115.1 . . ?
C55 C54 H54 115.1 . . ?
C54 C55 C56 128.1(6) . . ?
C54 C55 H55 115.9 . . ?
C56 C55 H55 115.9 . . ?
C57 C56 C55 130.2(6) . . ?
C57 C56 H56 114.9 . . ?
C55 C56 H56 114.9 . . ?
C56 C57 C58 127.9(6) . . ?
C56 C57 H57 116.0 . . ?
C58 C57 H57 116.0 . . ?
C59 C58 C57 129.0(6) . . ?
C59 C58 H58 115.5 . . ?
C57 C58 H58 115.5 . . ?
C51 C59 C58 124.6(6) . . ?
C51 C59 C60 107.1(6) . . ?
C58 C59 C60 128.3(6) . . ?
C54 C60 C53 126.5(6) . . ?
C54 C60 C59 126.5(6) . . ?
C53 C60 C59 106.8(5) . . ?
 
loop_
 _geom_torsion_atom_site_label_1
 _geom_torsion_atom_site_label_2
 _geom_torsion_atom_site_label_3
 _geom_torsion_atom_site_label_4
 _geom_torsion
 _geom_torsion_site_symmetry_1
 _geom_torsion_site_symmetry_2
 _geom_torsion_site_symmetry_3
 _geom_torsion_site_symmetry_4
 _geom_torsion_publ_flag
C9 C1 C2 C3 0.6(7) . . . . ?
C1 C2 C3 C10 -1.0(7) . . . . ?
C10 C4 C5 C6 3.5(10) . . . . ?
C4 C5 C6 C7 -3.3(9) . . . . ?
C4 C5 C6 C16 176.5(5) . . . . ?
C5 C6 C7 C8 0.3(9) . . . . ?
C16 C6 C7 C8 -179.5(5) . . . . ?
C6 C7 C8 C9 0.0(10) . . . . ?
C7 C8 C9 C1 -178.6(5) . . . . ?
C7 C8 C9 C10 2.8(9) . . . . ?
C2 C1 C9 C8 -178.8(5) . . . . ?
C2 C1 C9 C10 0.0(6) . . . . ?
C5 C4 C10 C3 178.0(6) . . . . ?
C5 C4 C10 C9 0.5(10) . . . . ?
C2 C3 C10 C4 -177.0(6) . . . . ?
C2 C3 C10 C9 0.9(6) . . . . ?
C8 C9 C10 C4 -3.9(9) . . . . ?
C1 C9 C10 C4 177.4(5) . . . . ?
C8 C9 C10 C3 178.2(5) . . . . ?
C1 C9 C10 C3 -0.6(6) . . . . ?
C19 C11 C12 C13 -2.2(7) . . . . ?
C19 C11 C12 C22 174.9(6) . . . . ?
C11 C12 C13 C20 1.7(7) . . . . ?
C22 C12 C13 C20 -175.4(5) . . . . ?
C20 C14 C15 C16 -0.3(11) . . . . ?
C14 C15 C16 C17 -0.8(10) . . . . ?
C14 C15 C16 C6 178.9(6) . . . . ?
C7 C6 C16 C15 -131.3(5) . . . . ?
C5 C6 C16 C15 48.8(7) . . . . ?
C7 C6 C16 C17 48.4(7) . . . . ?
C5 C6 C16 C17 -131.5(5) . . . . ?
C15 C16 C17 C18 -1.4(10) . . . . ?
C6 C16 C17 C18 178.9(6) . . . . ?
C16 C17 C18 C19 4.0(11) . . . . ?
C17 C18 C19 C11 175.6(6) . . . . ?
C17 C18 C19 C20 -2.8(10) . . . . ?
C12 C11 C19 C18 -176.9(6) . . . . ?
C12 C11 C19 C20 1.8(7) . . . . ?
C15 C14 C20 C13 -176.3(6) . . . . ?
C15 C14 C20 C19 2.0(11) . . . . ?
C12 C13 C20 C14 178.0(6) . . . . ?
C12 C13 C20 C19 -0.6(7) . . . . ?
C18 C19 C20 C14 -0.6(10) . . . . ?
C11 C19 C20 C14 -179.3(6) . . . . ?
C18 C19 C20 C13 178.0(6) . . . . ?
C11 C19 C20 C13 -0.7(7) . . . . ?
C29 C21 C22 C23 -0.1(7) . . . . ?
C29 C21 C22 C12 179.7(6) . . . . ?
C13 C12 C22 C23 -0.8(10) . . . . ?
C11 C12 C22 C23 -177.5(6) . . . . ?
C13 C12 C22 C21 179.3(6) . . . . ?
C11 C12 C22 C21 2.7(10) . . . . ?
C21 C22 C23 C30 -0.6(7) . . . . ?
C12 C22 C23 C30 179.5(5) . . . . ?
C30 C24 C25 C26 1.0(11) . . . . ?
C24 C25 C26 C27 -1.1(12) . . . . ?
C25 C26 C27 C28 -1.0(12) . . . . ?
C26 C27 C28 C29 3.0(11) . . . . ?
C27 C28 C29 C21 179.1(6) . . . . ?
C27 C28 C29 C30 -2.5(11) . . . . ?
C22 C21 C29 C28 179.5(6) . . . . ?
C22 C21 C29 C30 0.8(7) . . . . ?
C25 C24 C30 C23 -179.6(6) . . . . ?
C25 C24 C30 C29 -0.1(11) . . . . ?
C22 C23 C30 C24 -179.3(6) . . . . ?
C22 C23 C30 C29 1.1(7) . . . . ?
C28 C29 C30 C24 0.6(11) . . . . ?
C21 C29 C30 C24 179.3(6) . . . . ?
C28 C29 C30 C23 -179.8(6) . . . . ?
C21 C29 C30 C23 -1.2(7) . . . . ?
C39 C31 C32 C33 -0.1(7) . . . . ?
C31 C32 C33 C40 0.2(7) . . . . ?
C40 C34 C35 C36 -0.1(10) . . . . ?
C34 C35 C36 C37 1.4(9) . . . . ?
C34 C35 C36 C46 -176.0(5) . . . . ?
C35 C36 C37 C38 -0.7(9) . . . . ?
C46 C36 C37 C38 176.7(5) . . . . ?
C36 C37 C38 C39 -0.4(10) . . . . ?
C37 C38 C39 C31 -179.5(6) . . . . ?
C37 C38 C39 C40 -0.2(10) . . . . ?
C32 C31 C39 C38 179.4(5) . . . . ?
C32 C31 C39 C40 0.0(6) . . . . ?
C35 C34 C40 C33 179.5(6) . . . . ?
C35 C34 C40 C39 -1.7(10) . . . . ?
C32 C33 C40 C34 178.8(6) . . . . ?
C32 C33 C40 C39 -0.2(7) . . . . ?
C38 C39 C40 C34 1.7(9) . . . . ?
C31 C39 C40 C34 -178.9(5) . . . . ?
C38 C39 C40 C33 -179.3(5) . . . . ?
C31 C39 C40 C33 0.1(6) . . . . ?
C49 C41 C42 C43 0.8(7) . . . . ?
C49 C41 C42 C52 179.8(6) . . . . ?
C41 C42 C43 C50 -0.5(7) . . . . ?
C52 C42 C43 C50 -179.4(6) . . . . ?
C50 C44 C45 C46 -2.0(11) . . . . ?
C44 C45 C46 C47 1.4(10) . . . . ?
C44 C45 C46 C36 178.3(6) . . . . ?
C35 C36 C46 C45 -47.7(7) . . . . ?
C37 C36 C46 C45 134.6(5) . . . . ?
C35 C36 C46 C47 129.5(5) . . . . ?
C37 C36 C46 C47 -48.2(7) . . . . ?
C45 C46 C47 C48 1.8(11) . . . . ?
C36 C46 C47 C48 -175.2(6) . . . . ?
C46 C47 C48 C49 -2.9(11) . . . . ?
C47 C48 C49 C41 -178.6(6) . . . . ?
C47 C48 C49 C50 0.6(11) . . . . ?
C42 C41 C49 C48 178.5(6) . . . . ?
C42 C41 C49 C50 -0.8(7) . . . . ?
C45 C44 C50 C43 -180.0(6) . . . . ?
C45 C44 C50 C49 -0.3(10) . . . . ?
C42 C43 C50 C44 179.7(6) . . . . ?
C42 C43 C50 C49 0.0(7) . . . . ?
C48 C49 C50 C44 1.4(10) . . . . ?
C41 C49 C50 C44 -179.2(6) . . . . ?
C48 C49 C50 C43 -178.8(6) . . . . ?
C41 C49 C50 C43 0.5(7) . . . . ?
C59 C51 C52 C53 1.1(7) . . . . ?
C59 C51 C52 C42 -176.2(5) . . . . ?
C41 C42 C52 C53 -177.4(6) . . . . ?
C43 C42 C52 C53 1.3(10) . . . . ?
C41 C42 C52 C51 -0.6(9) . . . . ?
C43 C42 C52 C51 178.2(6) . . . . ?
C51 C52 C53 C60 -0.6(7) . . . . ?
C42 C52 C53 C60 176.6(6) . . . . ?
C60 C54 C55 C56 -2.1(11) . . . . ?
C54 C55 C56 C57 2.3(12) . . . . ?
C55 C56 C57 C58 0.3(12) . . . . ?
C56 C57 C58 C59 -3.5(12) . . . . ?
C52 C51 C59 C58 178.2(6) . . . . ?
C52 C51 C59 C60 -1.2(7) . . . . ?
C57 C58 C59 C51 -175.5(6) . . . . ?
C57 C58 C59 C60 3.7(11) . . . . ?
C55 C54 C60 C53 177.2(6) . . . . ?
C55 C54 C60 C59 0.9(11) . . . . ?
C52 C53 C60 C54 -176.9(6) . . . . ?
C52 C53 C60 C59 -0.1(7) . . . . ?
C51 C59 C60 C54 177.6(6) . . . . ?
C58 C59 C60 C54 -1.7(11) . . . . ?
C51 C59 C60 C53 0.8(7) . . . . ?
C58 C59 C60 C53 -178.6(6) . . . . ?
 
_refine_diff_density_max    0.239
_refine_diff_density_min   -0.296
_refine_diff_density_rms    0.057

_shelx_res_file
;

    140120_maki_TAz3_beppu_1.res created by SHELXL-2014/7

TITL TAz3
REM  Yadorkari-X generated
CELL 0.71073 5.9450 7.2440 40.5770 90.0000 91.3450 90.0000
ZERR 4.0 0.0008 0.0011 0.0069 0.0000 0.0140 0.0000
LATT -1
SYMM +X, -Y, 1/2+Z
REM  SPGR Pc monoclinic
SFAC C H
UNIT 120 80
SIZE 0.08 0.05 0.03
TEMP -180.0
L.S. 30
FMAP 2
PLAN -20
ACTA
CONF
LIST 4
BOND $H
OMIT    0    0   -4
OMIT    0    0    4

SHEL 5.1 0.77

WGHT    0.050700
FVAR       1.21128
C1    1    0.355329    0.543907    0.302172    11.00000    0.01692    0.02118 =
         0.02767    0.00017   -0.00423   -0.00541
AFIX  43
H1    2    0.231106    0.603314    0.291518    11.00000   -1.20000
AFIX   0
C2    1    0.545799    0.483673    0.287301    11.00000    0.02400    0.03345 =
         0.02001   -0.00331    0.00027   -0.00500
AFIX  43
H2    2    0.574487    0.496178    0.264476    11.00000   -1.20000
AFIX   0
C3    1    0.689473    0.402825    0.309870    11.00000    0.02012    0.01840 =
         0.03182   -0.00166    0.00289   -0.00559
AFIX  43
H3    2    0.831144    0.349248    0.305252    11.00000   -1.20000
AFIX   0
C4    1    0.685377    0.355889    0.368875    11.00000    0.01699    0.01353 =
         0.02919   -0.00089    0.00154   -0.00479
AFIX  43
H4    2    0.829615    0.300395    0.367461    11.00000   -1.20000
AFIX   0
C5    1    0.603864    0.365515    0.399672    11.00000    0.01889    0.01728 =
         0.01930    0.00268   -0.00273   -0.00449
AFIX  43
H5    2    0.703322    0.322378    0.416645    11.00000   -1.20000
AFIX   0
C6    1    0.397926    0.428496    0.410295    11.00000    0.01137    0.01086 =
         0.02603    0.00240   -0.00192   -0.00255
C7    1    0.230031    0.505144    0.391276    11.00000    0.01362    0.01546 =
         0.02331    0.00166    0.00283   -0.00008
AFIX  43
H7    2    0.099947    0.541141    0.402821    11.00000   -1.20000
AFIX   0
C8    1    0.221368    0.537522    0.358359    11.00000    0.01576    0.02044 =
         0.02586   -0.00484   -0.00055    0.00059
AFIX  43
H8    2    0.085931    0.592823    0.350334    11.00000   -1.20000
AFIX   0
C9    1    0.374829    0.503449    0.335332    11.00000    0.01599    0.01866 =
         0.02931   -0.00001   -0.00137   -0.00557
C10   1    0.594834    0.412249    0.340054    11.00000    0.01857    0.02084 =
         0.02674   -0.00219    0.00179   -0.00642
C11   1    0.052923    0.301062    0.543278    11.00000    0.01565    0.01792 =
         0.02329    0.00138    0.00118    0.00077
AFIX  43
H11   2   -0.089208    0.243640    0.545896    11.00000   -1.20000
AFIX   0
C12   1    0.190424    0.366261    0.568453    11.00000    0.01709    0.01067 =
         0.02950    0.00033    0.00031    0.00230
C13   1    0.384258    0.433518    0.555186    11.00000    0.01917    0.01754 =
         0.01686   -0.00195   -0.00385   -0.00177
AFIX  43
H13   2    0.507973    0.483348    0.567470    11.00000   -1.20000
AFIX   0
C14   1    0.527706    0.473938    0.499942    11.00000    0.01398    0.01518 =
         0.02506   -0.00024   -0.00162    0.00329
AFIX  43
H14   2    0.661760    0.522802    0.509704    11.00000   -1.20000
AFIX   0
C15   1    0.522318    0.471373    0.466770    11.00000    0.01396    0.01691 =
         0.02209    0.00255    0.00249    0.00059
AFIX  43
H15   2    0.652708    0.519179    0.456704    11.00000   -1.20000
AFIX   0
C16   1    0.357145    0.410215    0.445317    11.00000    0.01430    0.01188 =
         0.01421   -0.00005   -0.00272    0.00187
C17   1    0.154592    0.333488    0.453791    11.00000    0.01684    0.01601 =
         0.02519    0.00017   -0.00366    0.00311
AFIX  43
H17   2    0.058981    0.301647    0.435582    11.00000   -1.20000
AFIX   0
C18   1    0.068640    0.295772    0.483560    11.00000    0.01931    0.01222 =
         0.01868   -0.00115   -0.00290    0.00230
AFIX  43
H18   2   -0.072664    0.234472    0.482986    11.00000   -1.20000
AFIX   0
C19   1    0.153719    0.332253    0.514044    11.00000    0.02214    0.01420 =
         0.02283    0.00430   -0.00173    0.00595
C20   1    0.372247    0.417874    0.521505    11.00000    0.01287    0.01209 =
         0.03416    0.00125   -0.00340    0.00250
C21   1   -0.055932    0.307691    0.616412    11.00000    0.01400    0.02346 =
         0.02558   -0.00184   -0.00341    0.00050
AFIX  43
H21   2   -0.178963    0.251364    0.604931    11.00000   -1.20000
AFIX   0
C22   1    0.138931    0.372498    0.602194    11.00000    0.01998    0.01589 =
         0.01761   -0.00046   -0.00597    0.00417
C23   1    0.277062    0.444718    0.626332    11.00000    0.01757    0.01985 =
         0.02587    0.00259    0.00179    0.00204
AFIX  43
H23   2    0.421360    0.496982    0.623038    11.00000   -1.20000
AFIX   0
C24   1    0.259719    0.488004    0.685284    11.00000    0.01765    0.02228 =
         0.02616   -0.00209   -0.00019    0.00126
AFIX  43
H24   2    0.403609    0.544741    0.684618    11.00000   -1.20000
AFIX   0
C25   1    0.169262    0.477176    0.715659    11.00000    0.02132    0.03394 =
         0.01217   -0.00327   -0.00096    0.00062
AFIX  43
H25   2    0.256120    0.528799    0.733317    11.00000   -1.20000
AFIX   0
C26   1   -0.031576    0.400878    0.723747    11.00000    0.02268    0.03428 =
         0.02202    0.00658    0.00048    0.00521
AFIX  43
H26   2   -0.062994    0.405392    0.746580    11.00000   -1.20000
AFIX   0
C27   1   -0.194177    0.319659    0.704797    11.00000    0.02446    0.01858 =
         0.02210    0.00251    0.00062    0.00040
AFIX  43
H27   2   -0.320464    0.274071    0.716183    11.00000   -1.20000
AFIX   0
C28   1   -0.199559    0.295294    0.671819    11.00000    0.01832    0.02069 =
         0.03310   -0.00130    0.00195    0.00088
AFIX  43
H28   2   -0.332931    0.240304    0.662985    11.00000   -1.20000
AFIX   0
C29   1   -0.041841    0.338105    0.649539    11.00000    0.01560    0.02208 =
         0.02623    0.00499   -0.00242   -0.00319
C30   1    0.174690    0.429668    0.655760    11.00000    0.02090    0.01593 =
         0.02561    0.00143   -0.00262    0.00104
C31   1    0.860557    0.930350    0.290148    11.00000    0.01964    0.02730 =
         0.02501   -0.00206   -0.00140    0.00405
AFIX  43
H31   2    0.734781    0.884659    0.277791    11.00000   -1.20000
AFIX   0
C32   1    1.047970    1.009623    0.277266    11.00000    0.02636    0.03243 =
         0.02289    0.00122    0.00356    0.00095
AFIX  43
H32   2    1.072690    1.027381    0.254439    11.00000   -1.20000
AFIX   0
C33   1    1.194894    1.059632    0.302295    11.00000    0.02081    0.02334 =
         0.03132   -0.00363    0.00331   -0.00445
AFIX  43
H33   2    1.336716    1.117569    0.299678    11.00000   -1.20000
AFIX   0
C34   1    1.192761    1.033942    0.361730    11.00000    0.01327    0.01819 =
         0.03194   -0.00425    0.00317    0.00336
AFIX  43
H34   2    1.338232    1.088288    0.362283    11.00000   -1.20000
AFIX   0
C35   1    1.111499    0.991711    0.391632    11.00000    0.01512    0.01712 =
         0.01950   -0.00161    0.00014    0.00294
AFIX  43
H35   2    1.208822    1.020892    0.409794    11.00000   -1.20000
AFIX   0
C36   1    0.909844    0.913064    0.399871    11.00000    0.01458    0.01402 =
         0.02670   -0.00076    0.00137    0.00337
C37   1    0.741804    0.854639    0.378387    11.00000    0.01202    0.01735 =
         0.02210   -0.00236    0.00361   -0.00083
AFIX  43
H37   2    0.613870    0.801993    0.388371    11.00000   -1.20000
AFIX   0
C38   1    0.733254    0.861645    0.345104    11.00000    0.02003    0.01347 =
         0.03252    0.00125   -0.00109    0.00276
AFIX  43
H38   2    0.600120    0.812319    0.335143    11.00000   -1.20000
AFIX   0
C39   1    0.884250    0.927731    0.323865    11.00000    0.01862    0.01507 =
         0.02320    0.00193   -0.00029    0.00310
C40   1    1.102650    1.011992    0.331576    11.00000    0.02122    0.01373 =
         0.02733   -0.00316    0.00419    0.00267
C41   1    0.565581    0.942492    0.534386    11.00000    0.01710    0.02231 =
         0.02555   -0.00115    0.00247    0.00017
AFIX  43
H41   2    0.422374    0.996039    0.537989    11.00000   -1.20000
AFIX   0
C42   1    0.705142    0.870067    0.558589    11.00000    0.01413    0.01553 =
         0.03136    0.00100    0.00077   -0.00253
C43   1    0.899403    0.807739    0.543585    11.00000    0.01718    0.01704 =
         0.02193   -0.00041    0.00085    0.00068
AFIX  43
H43   2    1.024226    0.752193    0.554763    11.00000   -1.20000
AFIX   0
C44   1    1.037505    0.797778    0.487819    11.00000    0.01502    0.01553 =
         0.01947   -0.00024   -0.00162   -0.00023
AFIX  43
H44   2    1.171037    0.741500    0.496318    11.00000   -1.20000
AFIX   0
C45   1    1.031547    0.824688    0.454825    11.00000    0.01125    0.01427 =
         0.03089   -0.00285    0.00169   -0.00068
AFIX  43
H45   2    1.163486    0.788309    0.443769    11.00000   -1.20000
AFIX   0
C46   1    0.864765    0.896132    0.435056    11.00000    0.01865    0.00784 =
         0.02088   -0.00139    0.00154   -0.00179
C47   1    0.659308    0.962179    0.445373    11.00000    0.01521    0.01329 =
         0.02870    0.00085   -0.00248   -0.00245
AFIX  43
H47   2    0.562102    1.003490    0.427979    11.00000   -1.20000
AFIX   0
C48   1    0.573070    0.978297    0.475386    11.00000    0.01697    0.01771 =
         0.02270    0.00083    0.00391   -0.00366
AFIX  43
H48   2    0.428757    1.034226    0.476168    11.00000   -1.20000
AFIX   0
C49   1    0.663015    0.926124    0.504465    11.00000    0.01413    0.01329 =
         0.02658   -0.00008   -0.00238   -0.00595
C50   1    0.883525    0.838444    0.510406    11.00000    0.01586    0.01275 =
         0.02464    0.00014    0.00223   -0.00585
C51   1    0.458943    0.935517    0.605693    11.00000    0.01578    0.02227 =
         0.02671   -0.00158   -0.00055   -0.00042
AFIX  43
H51   2    0.335515    0.986533    0.593506    11.00000   -1.20000
AFIX   0
C52   1    0.656240    0.865254    0.592365    11.00000    0.02254    0.02390 =
         0.01029   -0.00361    0.00268   -0.00659
C53   1    0.792168    0.801075    0.617563    11.00000    0.02346    0.01372 =
         0.02179    0.00060   -0.00081    0.00047
AFIX  43
H53   2    0.935484    0.745388    0.615115    11.00000   -1.20000
AFIX   0
C54   1    0.773003    0.793092    0.676907    11.00000    0.01612    0.02153 =
         0.03281    0.00114   -0.00222    0.00011
AFIX  43
H54   2    0.917071    0.736286    0.677398    11.00000   -1.20000
AFIX   0
C55   1    0.684110    0.824460    0.706858    11.00000    0.02086    0.02820 =
         0.01630   -0.00044    0.00088   -0.00124
AFIX  43
H55   2    0.771348    0.783086    0.725332    11.00000   -1.20000
AFIX   0
C56   1    0.482790    0.908957    0.713867    11.00000    0.02774    0.02740 =
         0.02514   -0.00438    0.00391   -0.00353
AFIX  43
H56   2    0.453913    0.921691    0.736682    11.00000   -1.20000
AFIX   0
C57   1    0.319625    0.976700    0.693301    11.00000    0.01990    0.01889 =
         0.03122    0.00515    0.00285   -0.00073
AFIX  43
H57   2    0.193505    1.030519    0.703571    11.00000   -1.20000
AFIX   0
C58   1    0.314556    0.976980    0.659858    11.00000    0.02196    0.02030 =
         0.02839    0.00058    0.00150   -0.00158
AFIX  43
H58   2    0.181035    1.024747    0.649758    11.00000   -1.20000
AFIX   0
C59   1    0.473679    0.918523    0.638852    11.00000    0.01916    0.01683 =
         0.02175   -0.00123    0.00413   -0.00255
C60   1    0.688535    0.830038    0.646713    11.00000    0.01749    0.01373 =
         0.02925    0.00328   -0.00127   -0.00327

HKLF 4 1 1 0 0 0 1 0 0 0 1

REM  TAz3
REM R1 =  0.0678 for    4831 Fo > 4sig(Fo)  and  0.1290 for all    7991 data
REM    541 parameters refined using      2 restraints

END

WGHT      0.0507      0.0000

REM Highest difference peak  0.239,  deepest hole -0.296,  1-sigma level  0.057
Q1    1   0.3491  0.9612  0.7369  11.00000  0.05    0.24
Q2    1  -0.0578  0.3555  0.6742  11.00000  0.05    0.23
Q3    1   0.3797  0.4158  0.4966  11.00000  0.05    0.23
Q4    1   0.4449  0.8898  0.6612  11.00000  0.05    0.22
Q5    1   0.8815  0.8954  0.4181  11.00000  0.05    0.22
Q6    1   0.9892  0.6842  0.6008  11.00000  0.05    0.21
Q7    1   0.4255  1.0168  0.6502  11.00000  0.05    0.21
Q8    1   1.1159  1.0455  0.3475  11.00000  0.05    0.20
Q9    1   0.5390  0.1073  0.3868  11.00000  0.05    0.20
Q10   1   0.8273  0.8423  0.6402  11.00000  0.05    0.20
Q11   1   0.8804  0.7379  0.4688  11.00000  0.05    0.20
Q12   1   0.3560  0.4802  0.3556  11.00000  0.05    0.20
Q13   1   0.7883  0.6836  0.7115  11.00000  0.05    0.20
Q14   1   0.5980  0.6836  0.4866  11.00000  0.05    0.20
Q15   1   1.1505  0.8418  0.3970  11.00000  0.05    0.19
Q16   1   0.0661  0.1946  0.4505  11.00000  0.05    0.19
Q17   1   0.4580  0.8341  0.4027  11.00000  0.05    0.19
Q18   1   0.5843  0.6837  0.3413  11.00000  0.05    0.19
Q19   1  -0.0515  0.2310  0.6892  11.00000  0.05    0.19
Q20   1   0.3850  0.5310  0.4024  11.00000  0.05    0.19
;
_shelx_res_checksum   33668

_shelx_hkl_file
;
   0   0  -4-4.12268 8.05613   3
   0   0  -4-6.74211 7.33636   1
   0   0  -4-9.02997 6.11370   4
   0   0   4-9.04457 9.56222   3
   0   0   4-4.44826 6.33315   1
   0   0  -4-13.7020 10.6925   2
   0   0   4-7.72505 10.4950   4
   0   0  -5-26.6073 13.6080   3
   0   0   5-0.97393 8.16921   2
   0   0  -5-12.7505 14.9322   2
   0   0  -5 0.01357 8.14463   4
   0   0  -5-16.7209 11.5875   1
   0   0   5-11.0959 10.1020   1
   0   0   5-9.53613 14.2783   4
   0   0   5-10.4023 14.7576   3
   0   0   6 10467.7 126.386   4
   0   0  -6 11735.2 135.002   2
   0   0   6 10707.0 136.489   3
   0   0  -6 12201.6 128.582   1
   0   0  -6 11903.8 138.413   3
   0   0   7-13.6925 18.4805   4
   0   0  -7-3.82422 17.6318   1
   0   0  -7-36.7452 18.1343   4
   0   0   7-15.2293 19.0711   1
   0   0  -7 12.4099 20.1639   2
   0   0   7 1.80676 22.3642   3
   0   0  -7-10.3102 19.4703   3
   0   0   7-30.4752 19.3834   2
   0   0   8 417.749 42.8263   3
   0   0  -8 685.688 40.1313   1
   0   0  -8 799.583 47.5546   3
   0   0  -8 680.778 40.4531   4
   0   0   8 640.798 42.0521   2
   0   0   8 540.023 39.1928   4
   0   0   8 739.284 42.6986   1
   0   0  -8 537.518 39.5759   2
   0   0  -9 4.94792 22.1671   1
   0   0  -9-2.48204 25.8343   2
   0   0   9 37.3463 27.2935   1
   0   0   9-27.6078 27.1321   4
   0   0   9 12.3068 29.0970   3
   0   0  -9-8.39292 23.0478   4
   0   0  -9 4.24306 26.5548   3
   0   0   9-5.81930 24.1708   2
   0   0 -10 1913.94 79.8314   3
   0   0 -10 1838.70 70.4920   4
   0   0  10 1955.03 73.7187   1
   0   0  10 1784.08 70.6514   2
   0   0  11 15.6061 29.2399   1
   0   0  11 16.3932 28.0641   2
   0   0 -11 5.19417 28.3898   4
   0   0 -11-63.7639 37.1261   3
   0   0  12 6393.73 141.315   2
   0   0  12 6806.38 146.413   1
   0   0 -12 6713.01 151.217   3
   0   0 -12 6761.53 141.113   4
   0   0 -13-13.1403 29.4759   4
   0   0  13 39.6066 31.0739   1
   0   0  13-19.4535 28.4692   2
   0   0 -13-37.2226 36.0968   3
   0   0  14 71.1733 35.2230   2
   0   0 -14 98.4067 34.8950   4
   0   0 -14 71.1471 35.4921   3
   0   0  14 146.239 40.3802   1
   0   0 -15-29.5126 32.9688   3
   0   0  15-52.2838 36.6329   1
   0   0 -15 10.8064 32.1031   4
   0   0  15 8.88770 32.4701   2
   0   0  16 933.174 69.7145   1
   0   0  16 949.483 69.8048   2
   0   0 -16 955.441 74.4102   3
   0   0 -16 1036.59 68.6255   4
   0   0  17 50.4601 34.3071   2
   0   0  17 37.5323 37.5997   1
   0   0 -17-6.08889 35.9652   3
   0   0 -17-36.0472 34.3200   4
   0   0  18 5877.98 170.917   1
   0   0 -18 5534.76 156.587   4
   0   0 -18 5717.03 173.677   3
   0   0  18 5674.42 163.788   2
   0   0  19 39.7059 38.7872   2
   0   0 -19 3.10518 43.1099   3
   0   0 -19-27.9592 33.1278   4
   0   0  19 14.6707 36.8634   1
   0   0 -20 3896.62 152.758   3
   0   0  20 4170.77 154.662   1
   0   0  20 4161.67 149.016   2
   0   0 -20 4157.20 145.108   4
   0   0 -21-67.4153 46.1117   3
   0   0  21-19.6814 36.8310   1
   0   0  21 25.6617 36.2308   2
   0   0 -21-40.6263 35.4008   4
   0   0 -22 140.119 43.3106   4
   0   0  22 82.1943 38.2109   2
   0   0 -22 141.436 46.2192   3
   0   0  22 80.8220 38.0416   1
   0   0 -23-30.9389 34.2087   4
   0   0  23 5.94969 36.6093   1
   0   0  23 20.6282 35.6865   2
   0   0 -23-17.6346 41.1722   3
   0   0 -24 56.5214 39.0235   4
   0   0  24 51.9874 41.8202   2
   0   0  24 64.9543 41.6535   1
   0   0 -24-0.61708 37.7820   3
   0   0 -25 27.2567 40.5592   3
   0   0  25 27.7329 43.0896   1
   0   0  25-5.99008 39.5174   2
   0   0 -25-27.7041 35.0367   4
   0   0 -26 815.059 88.9305   3
   0   0  26 977.582 90.4113   2
   0   0 -26 976.054 84.5201   4
   0   0  26 874.007 87.4742   1
   0   0  27 88.4604 46.5239   2
   0   0 -27-8.27862 36.1716   4
   0   0  27-18.3652 42.5355   1
   0   0 -27 10.3748 40.0765   3
   0   0  28 860.518 86.6196   2
   0   0 -28 878.118 91.7739   3
   0   0 -28 844.271 81.5891   4
   0   0  28 807.862 87.2908   1
   0   0 -29 16.0958 42.0544   3
   0   0  29-44.2759 48.0008   1
   0   0  29 65.6046 44.5804   2
   0   0 -29 27.0742 37.3745   4
   0   0 -30 155.967 54.5200   3
   0   0 -30 290.092 60.5840   4
   0   0  30 188.207 50.6245   1
   0   0  30 236.363 58.6364   2
   0   0  31 12.0976 47.0494   1
   0   0  31-3.33848 42.6390   2
   0   0 -31-72.0499 44.8021   4
   0   0 -31 34.6601 44.9687   3
   0   0  32 264.041 64.7515   1
   0   0 -32 338.703 72.9865   3
   0   0  32 200.568 54.8692   2
   0   0 -32 232.978 52.9873   4
   0   0 -33 13.2448 41.3774   4
   0   0  33-43.3131 47.7365   2
   0   0  33 2.80229 44.1758   1
   0   0 -33 18.1391 49.2590   3
   0   0  34 839.646 102.073   1
   0   0 -34 907.487 107.019   3
   0   0 -34 973.480 98.1877   4
   0   0  34 1021.26 105.967   2
   0   0  35-16.5502 46.4632   1
   0   0  35 60.3554 52.9369   2
   0   0 -35-30.1885 42.3259   4
   0   0 -35 17.9106 46.0077   3
   0   0 -36 197.891 66.9132   3
   0   0 -36 164.928 48.0169   4
   0   0  36 357.820 75.4333   2
   0   0  36 336.969 77.7025   1
   0   0 -37-1.86216 50.1079   3
   0   0  37 55.3358 56.3131   2
   0   0  37-19.8103 55.4252   1
   0   0 -37-26.0503 41.9464   4
   0   0  38-14.3981 51.8256   1
   0   0  38 85.7400 55.3106   2
   0   0 -38 92.9723 51.8408   4
   0   0 -39-23.6430 46.2742   4
   0   0  39-44.8404 55.0208   1
   0   0 -39 12.3415 54.6935   3
   0   0  39-25.4054 50.1630   2
   0   0  40 41.8144 53.9295   1
   0   0 -40 46.9517 49.0983   4
   0   0 -40 55.1507 57.9307   3
   0   0  40 19.8731 56.8682   2
   0   0  41-98.2919 72.5303   2
   0   0  41 3.42326 57.4757   1
   0   0 -41 142.291 71.6066   3
   0   0 -41-64.3728 56.4613   4
   0   0 -42 57.5450 60.7337   3
   0   0 -42-10.4265 53.3310   4
   0   0  42-88.9314 68.5826   1
   0   0  42-97.8587 67.9083   2
   0   0  43-59.5710 56.5017   1
   0   0 -43-29.0399 56.4314   3
   0   0  43-11.7862 60.2145   2
   0   0 -43-82.6312 59.2301   4
   0   0  44 87.4122 68.0812   2
   0   0 -44 27.7074 58.8446   4
   0   0  44-32.8562 68.0682   1
   0   0 -44-66.3190 62.9398   3
   0   0  45 64.9786 64.8526   2
   0   0 -45 7.10130 51.4384   4
   0   0  45-121.140 72.9885   1
   0   0 -45 72.8770 67.6814   3
   0   0 -46 24.7410 51.0165   4
   0   0  46-117.475 74.8463   1
   0   0 -46 46.4710 64.6187   3
   0   0  46-66.9261 63.6992   2
   0   0  47 20.6561 65.2906   2
   0   0  47-119.062 78.9057   1
   0   0 -47-5.76593 64.8793   3
   0   0 -47 74.3846 62.6360   4
   0   0 -48-93.9208 65.0806   4
   0   0  48 4.34365 66.0296   2
   0   0 -48 35.1137 68.2646   3
   0   0  48 172.596 87.9237   1
   0   0 -49-4.85897 63.3901   3
   0   0  49 26.6316 73.7323   2
   0   0 -49-24.6262 59.4718   4
   0   0  49 39.7522 68.8471   1
   0   0  50 9.97656 71.6115   2
   0   0 -50-109.282 78.6853   3
   0   0 -50-18.7051 61.0048   4
   0   0  50 4.99171 72.8448   1
   0   0 -51-2.90859 60.9494   4
   0   0 -51 20.1534 69.6179   3
   0   0  51 206.923 94.5127   1
   0   0  51 12.2002 71.7274   2
   0   0  52-79.0557 81.7676   1
   0   0 -52-111.840 88.2933   3
   0   0  52-23.5268 75.9050   2
   0   0 -52 45.6160 71.8970   4
   0   0 -53 38.6493 69.9460   3
   0   0  53-149.315 89.9559   2
   0   0  53-154.463 85.9101   1
   0   0 -53-8.24848 62.5898   4
   0   0  54 250.099 103.522   1
   0   0 -54 35.8340 69.7573   4
   0   0 -54 60.1181 78.1217   3
   0   0  54 235.847 100.699   2
   0   0  55-74.6032 88.2098   1
   0   0  55 62.2498 92.3857   2
   0   0 -55-152.664 100.446   3
   0   0  56 178.146 97.7154   1
   0   0  56 15.6175 80.1984   2
   0   0 -56 232.648 102.361   3
   0   0  57-76.1686 93.5192   1
   0   0  57 91.7030 91.5454   2
   0   0 -57-34.3608 81.8626   3
   0   0 -58 132.102 90.6462   3
   0   0 -59 40.6938 88.3479   3
   0  -1   0-4.23849 12.1455   4
   0   1   0 27.0152 13.2590   2
   0  -1   0 1.96456 11.0812   2
   0   1   0 40.9325 20.7374   4
   0  -1   0 20.5248 17.8900   3
   0   1   0 6.87087 12.2630   1
   0  -1   0-16.8062 9.50703   1
   0   1   0 2.14900 12.0595   3
   0   1   1-3.25435 17.6530   4
   0  -1   1-8.95625 9.86823   1
   0   1  -1 3.75481 12.5948   3
   0  -1   1 21.6572 20.1330   3
   0   1  -1 24.4352 14.9822   1
   0  -1   1-0.05008 13.1133   4
   0  -1  -1-16.6083 13.0485   4
   0   1   1 12.6917 14.8191   2
   0   1   1 12.9360 12.5220   3
   0  -1  -1 38.7441 18.7233   3
   0  -1   1-4.52124 17.1418   4
   0  -1  -1 26.4951 13.1137   2
   0   1   2 35.9671 15.9391   2
   0  -1  -2-22.0355 14.2982   4
   0   1  -2 1.12443 13.7823   3
   0  -1  -2 17.9883 19.6675   3
   0   1  -2-4.27875 13.5136   4
   0  -1   2-6.66572 10.7642   1
   0  -1  -2-12.0203 15.9522   2
   0   1   2-12.3919 19.9555   4
   0  -1   2 18.4992 18.4959   3
   0   1   2-5.00823 12.3933   3
   0   1  -2 10.8115 16.5853   1
   0  -1   2 15.6598 18.1278   4
   0  -1   3 16.2322 19.5715   3
   0  -1   3 49.2755 19.9156   4
   0   1   3 23.1301 18.5450   2
   0   1  -3-4.60607 17.2245   3
   0   1   3 42.6179 22.0567   4
   0  -1   3-24.6432 14.2790   1
   0   1  -3-5.67026 15.2778   4
   0   1  -3 9.85292 17.9527   1
   0  -1  -3-18.9031 15.6460   4
   0  -1  -3 17.0529 17.3985   2
   0   1   3 1.15518 14.6504   3
   0  -1  -3-13.5783 20.5810   3
   0  -1   4 26.9850 21.8492   4
   0   1  -4 7.12521 21.7537   3
   0  -1  -4 0.22007 19.0622   2
   0   1   4 28.0434 21.3812   2
   0  -1  -4 31.9665 20.7388   3
   0  -1   4-12.0977 15.9325   1
   0   1   4 23.3823 17.9803   3
   0   1   4 24.7932 22.2571   4
   0   1  -4 16.6732 21.0040   1
   0  -1   4 18.4735 22.3245   3
   0  -1  -4 7.69969 15.7767   4
   0   1  -4 13.6804 14.5042   4
   0   1   5 9.86733 21.4258   4
   0   1   5 47.8183 22.3515   3
   0  -1   5-14.6482 21.9838   4
   0   1   5 36.5818 22.1292   2
   0   1  -5 36.9711 23.9215   3
   0  -1  -5 42.5756 21.9407   3
   0  -1  -5-1.18025 20.5761   2
   0   1  -5 26.7059 22.1193   1
   0  -1  -5 73.5605 23.2161   4
   0  -1   5 36.6424 26.1390   3
   0  -1   5 43.5657 22.6165   1
   0   1  -5 47.8371 22.4924   4
   0  -1   6 288.242 39.1779   3
   0   1   6 349.210 37.6421   4
   0   1   6 411.336 40.1202   3
   0  -1  -6 293.873 36.0776   2
   0   1  -6 380.176 37.7230   1
   0   1  -6 458.699 39.6434   3
   0  -1  -6 456.107 36.3419   4
   0  -1   6 418.656 23.0169   2
   0  -1   6 285.175 35.6423   4
   0   1  -6 378.789 22.0127   2
   0  -1   6 399.986 38.8339   1
   0  -1  -6 366.534 37.9677   3
   0   1   6 391.559 39.9376   2
   0   1  -6 394.354 34.9712   4
   0   1   7 23.7670 14.6527   1
   0  -1   7 65.5706 29.6033   1
   0  -1  -7 29.3104 24.7040   4
   0   1   7 29.2724 26.3709   2
   0   1  -7 46.9641 16.8038   2
   0  -1   7 44.3728 15.7922   2
   0   1   7 34.3981 26.4462   3
   0   1   7 34.8340 25.2919   4
   0   1  -7 30.7628 24.0168   4
   0   1  -7 59.7136 30.4378   3
   0   1  -8 133.128 22.1626   2
   0  -1   8 108.998 20.0223   2
   0   1   8 112.782 30.7633   3
   0   1   8 105.813 31.0959   2
   0  -1  -8 89.3193 19.1424   1
   0   1  -8 121.776 28.7882   4
   0  -1   8 108.578 32.3843   1
   0  -1  -8 66.9175 25.5838   4
   0   1  -8 134.166 33.0276   3
   0   1   8 110.222 20.6563   1
   0   1  -9 134.368 22.3311   2
   0  -1   9 167.437 36.2544   1
   0  -1   9 159.982 23.0724   2
   0  -1  -9 132.226 21.3141   1
   0   1  -9 117.595 31.2115   3
   0   1   9 140.375 36.2668   2
   0  -1  -9 137.684 31.5381   4
   0   1   9 104.520 20.7362   1
   0   1  -9 134.837 32.2764   4
   0  -1  -9 103.184 36.3593   3
   0   1 -10 164.174 26.7790   2
   0  -1  10 139.719 24.8530   2
   0  -1 -10 118.250 38.9181   3
   0  -1  10 156.604 40.1927   1
   0   1 -10 120.110 35.3558   3
   0   1 -10 88.9977 31.1007   4
   0  -1 -10 136.994 34.0953   4
   0   1  10 122.856 38.2258   2
   0  -1 -10 151.737 23.9059   1
   0   1  10 99.5189 23.4244   1
   0  -1  11 165.648 39.6879   1
   0   1 -11 160.306 37.1886   3
   0  -1 -11 182.675 46.5127   3
   0  -1 -11 171.240 25.8531   1
   0  -1  11 189.238 28.1274   2
   0   1 -11 181.905 35.1682   4
   0   1  11 186.711 44.6371   2
   0   1  11 144.567 25.3586   1
   0   1 -11 161.038 28.0254   2
   0  -1 -11 181.949 34.7494   4
   0   1  12 522.421 40.0875   1
   0  -1  12 555.260 60.5030   1
   0  -1 -12 402.469 33.3074   1
   0   1 -12 544.843 52.1761   4
   0  -1  12 485.452 37.9803   2
   0   1 -12 447.931 38.3969   2
   0   1  12 532.035 57.8410   2
   0  -1 -12 484.814 58.1213   3
   0   1 -12 478.672 50.7824   3
   0  -1 -12 491.469 48.1976   4
   0  -1  13-12.3394 32.9442   1
   0   1 -13 6.83437 30.6688   3
   0  -1 -13-37.7608 41.1468   3
   0  -1  13-4.84256 23.6461   2
   0   1  13-23.8466 37.5999   2
   0  -1 -13 4.61695 29.5632   4
   0   1  13 2.79064 23.0416   1
   0   1 -13 36.7876 30.7525   4
   0  -1  14 35.9544 25.1089   2
   0   1  14 17.3401 23.4075   1
   0  -1 -14 55.6140 30.7953   4
   0  -1  14 34.5741 39.3882   1
   0  -1 -14 64.7019 39.0761   3
   0   1 -14 7.66067 28.7135   4
   0   1  14 4.15750 36.6606   2
   0   1 -14-50.8664 35.1109   3
   0   1  15 115.779 43.5905   2
   0   1 -15 104.259 36.3719   3
   0  -1 -15 125.418 46.7315   3
   0  -1  15 130.163 31.4272   2
   0   1  15 119.325 31.0898   1
   0  -1  15 92.0338 42.0424   1
   0  -1 -15 101.278 35.9068   4
   0   1 -15 104.428 34.5121   4
   0   1  16 231.935 52.3299   2
   0   1 -16 130.735 37.9430   4
   0  -1  16 162.672 34.5620   2
   0   1 -16 197.394 45.3100   3
   0  -1 -16 108.540 38.6052   3
   0  -1 -16 234.984 44.3120   4
   0  -1  16 178.376 44.3366   1
   0   1  16 190.433 35.3897   1
   0  -1 -17 479.384 62.4515   3
   0  -1  17 406.244 46.2345   2
   0   1  17 480.337 49.1094   1
   0   1 -17 469.590 57.6540   3
   0  -1 -17 456.786 54.2664   4
   0  -1  17 420.992 60.0451   1
   0   1  17 535.911 64.5867   2
   0   1 -17 414.709 52.4052   4
   0   1 -18 3230.71 130.698   3
   0   1  18 3319.50 141.319   2
   0  -1 -18 3255.87 145.556   3
   0   1 -18 3355.21 126.645   4
   0  -1  18 3200.13 111.314   2
   0   1  18 3371.52 117.706   1
   0  -1 -18 3313.74 125.126   4
   0  -1  18 3130.84 137.026   1
   0   1  19 1044.90 74.0695   1
   0   1 -19 1049.40 78.4126   4
   0   1 -19 1048.73 79.7280   3
   0  -1 -19 956.346 74.3642   4
   0  -1  19 1003.46 68.5769   2
   0   1  19 1044.82 86.3209   2
   0  -1  19 1118.01 90.4045   1
   0  -1 -19 948.067 86.5606   3
   0  -1  20 1352.95 98.9131   1
   0   1 -20 1404.56 89.3665   4
   0   1 -20 1480.98 97.3747   3
   0   1  20 1414.01 102.656   2
   0  -1  20 1387.98 82.8493   2
   0  -1 -20 1451.95 92.1053   4
   0  -1 -20 1557.54 107.719   3
   0   1  20 1468.26 89.3026   1
   0  -1  21 384.252 51.8956   2
   0   1 -21 412.026 56.2583   4
   0   1  21 302.916 59.4349   2
   0  -1 -21 372.255 58.0361   4
   0   1 -21 397.292 59.7806   3
   0   1  21 409.956 54.6815   1
   0  -1 -21 388.086 69.2620   3
   0  -1  21 374.363 62.3096   1
   0   1 -22 166.218 46.1158   3
   0   1  22 120.525 46.8664   2
   0  -1 -22 128.768 51.3830   3
   0  -1  22 149.586 39.8920   2
   0  -1 -22 198.905 47.9629   4
   0  -1  22 204.851 52.9903   1
   0   1  22 218.607 47.3662   1
   0   1 -22 177.890 47.1832   4
   0   1  23 421.209 59.5201   1
   0   1 -23 417.448 59.6473   4
   0   1  23 561.533 74.4657   2
   0   1 -23 402.548 61.5561   3
   0  -1  23 515.107 59.0510   2
   0  -1  23 493.837 72.9649   1
   0  -1 -23 478.986 64.7332   4
   0  -1 -23 428.887 69.5440   3
   0   1 -24 146.883 48.2935   3
   0   1 -24 65.8781 35.3282   4
   0   1  24 74.4298 37.2066   1
   0  -1  24 105.403 37.3392   2
   0   1  24 137.735 51.3518   2
   0  -1  24 124.995 48.4545   1
   0  -1 -24 121.308 36.8585   4
   0  -1 -24 164.797 51.6342   3
   0   1  25 173.069 43.0405   1
   0   1 -25 200.480 47.9017   4
   0   1  25 229.108 62.1312   2
   0  -1 -25 163.974 46.9045   4
   0  -1 -25 242.848 60.0065   3
   0  -1  25 180.233 44.1181   2
   0  -1  25 196.071 53.6724   1
   0   1 -25 160.162 50.6510   3
   0   1 -26 598.941 73.8158   3
   0  -1  26 594.973 82.2244   1
   0   1  26 586.414 79.9491   2
   0  -1 -26 514.205 77.0737   3
   0   1 -26 575.123 72.0653   4
   0  -1 -26 636.212 74.6357   4
   0   1  26 620.867 70.8248   1
   0  -1  26 674.033 68.5749   2
   0  -1  27 165.055 50.2650   1
   0   1  27 149.356 53.4470   2
   0  -1 -27 137.411 44.9259   4
   0  -1 -27 175.222 55.7179   3
   0  -1  27 107.080 36.3608   2
   0   1 -27 190.056 54.5097   3
   0   1  27 139.074 44.1669   1
   0   1 -27 185.220 48.7926   4
   0   1 -28 227.888 53.7592   4
   0  -1  28 180.233 45.7088   2
   0   1 -28 154.286 52.1331   3
   0   1  28 209.455 65.2211   2
   0  -1  28 228.465 59.8502   1
   0  -1 -28 198.953 53.3869   4
   0   1  28 218.893 54.7906   1
   0  -1 -28 136.145 52.4289   3
   0  -1 -29 201.088 53.2061   3
   0   1 -29 111.277 52.5787   3
   0  -1  29 133.062 43.9426   2
   0   1  29 112.290 54.3008   2
   0   1 -29 64.0439 44.3876   4
   0  -1  29 92.1985 50.6422   1
   0   1  29 112.058 46.6761   1
   0  -1 -29 117.609 47.7711   4
   0   1  30 242.028 66.8643   2
   0  -1  30 267.074 55.0717   2
   0  -1  30 231.396 62.8322   1
   0   1  30 264.487 60.6479   1
   0   1 -30 261.949 61.1858   3
   0  -1 -30 307.347 61.6842   4
   0   1 -30 248.198 54.0751   4
   0  -1 -30 222.129 61.3816   3
   0   1  31 5.92499 46.8197   2
   0   1 -31 93.7130 53.0054   3
   0  -1  31 19.3413 40.5881   2
   0  -1  31 121.267 52.8340   1
   0   1 -31 77.3770 42.9709   4
   0  -1 -31 96.2808 56.0728   3
   0  -1 -31 124.505 48.2188   4
   0   1  31 138.466 50.7407   1
   0  -1 -32 523.427 76.0704   4
   0  -1  32 396.134 79.1747   1
   0   1  32 412.179 69.8523   1
   0   1 -32 408.286 71.2108   4
   0   1  32 449.180 81.6918   2
   0  -1  32 473.217 70.5210   2
   0   1 -32 366.548 73.4316   3
   0  -1 -32 562.315 90.2612   3
   0   1  33 379.860 69.1791   1
   0  -1 -33 439.691 73.3791   4
   0  -1  33 515.777 74.5768   2
   0   1 -33 468.941 74.2573   4
   0   1  33 415.911 80.4360   2
   0  -1 -33 273.610 74.2954   3
   0  -1  33 366.727 77.1091   1
   0   1 -33 319.051 68.9584   3
   0   1 -34 85.4979 53.5487   3
   0   1  34 155.313 58.1797   1
   0  -1  34 64.0849 48.7710   2
   0  -1 -34 169.977 55.3932   4
   0   1  34 63.8242 54.1949   2
   0  -1 -34 81.4075 49.9310   3
   0  -1  34 43.2545 49.7706   1
   0   1 -34 89.0375 47.7507   4
   0   1 -35 24.6638 48.7373   3
   0   1 -35 79.8320 41.8267   4
   0  -1  35 36.9451 43.1124   2
   0   1  35 42.5107 43.4237   1
   0  -1 -35 137.906 54.7771   4
   0  -1 -35 37.7324 56.6815   3
   0   1  35 102.381 55.0547   2
   0  -1  35 26.8809 51.2982   1
   0   1  36 80.4212 60.0226   2
   0   1 -36 86.8388 55.7947   3
   0   1 -36 144.936 55.0783   4
   0  -1  36 4.33467 54.7975   1
   0  -1  36 54.1768 48.2282   2
   0   1  36 27.8150 45.0272   1
   0  -1 -36 78.1837 63.5158   3
   0  -1 -36 13.7906 44.7293   4
   0  -1  37 139.571 67.0701   1
   0   1  37 134.152 70.0658   2
   0  -1  37 66.6279 51.4921   2
   0  -1 -37 17.3375 48.5061   4
   0   1 -37 92.8756 52.1694   4
   0   1 -37 118.825 56.2024   3
   0   1  37 97.9498 54.8667   1
   0  -1 -37 136.480 69.6597   3
   0  -1  38 1039.80 126.920   1
   0   1  38 1087.65 119.172   2
   0   1  38 971.935 114.369   1
   0  -1  38 1229.86 120.884   2
   0  -1 -38 1040.20 123.913   3
   0  -1 -38 1017.47 110.633   4
   0   1 -38 859.642 101.045   4
   0   1 -38 1073.25 120.851   3
   0  -1  39 302.565 71.3154   2
   0   1 -39 162.635 62.9130   4
   0   1  39 142.171 69.1989   2
   0  -1  39 373.279 85.8210   1
   0   1  39 129.920 60.1390   1
   0  -1 -39 165.695 74.1484   3
   0  -1 -39 248.050 67.7928   4
   0   1 -39 101.223 62.7588   3
   0  -1 -40 45.7759 62.3721   3
   0  -1 -40-31.1054 49.9235   4
   0   1 -40-31.1434 57.4420   4
   0  -1  40 133.850 67.7599   2
   0  -1  40-13.7726 60.2980   1
   0   1  40 44.9655 54.2338   1
   0   1 -40 15.3912 53.3470   3
   0   1  40-34.5017 61.0576   2
   0   1  41 44.0305 54.4524   1
   0  -1 -41 55.6539 47.7385   4
   0  -1  41 46.2333 55.9244   2
   0   1 -41 4.19406 48.4774   4
   0  -1 -41 43.9032 62.6839   3
   0   1  41-5.90157 61.2438   2
   0   1 -41 50.8635 64.6387   3
   0  -1  41 1.30021 61.1631   1
   0  -1  42 109.023 59.2704   1
   0   1 -42 81.2501 50.8244   4
   0   1  42 186.944 66.4248   1
   0  -1 -42 204.863 79.4067   3
   0  -1 -42 223.772 66.2864   4
   0  -1  42 42.9231 57.3766   2
   0   1 -42 70.4356 62.3599   3
   0   1  42 106.240 65.8091   2
   0  -1  43 115.263 66.3062   2
   0   1  43 80.4598 75.0439   2
   0  -1 -43 30.6816 63.7364   3
   0   1  43 49.0020 60.2331   1
   0   1 -43 100.045 68.1494   3
   0  -1  43 64.8876 69.3387   1
   0  -1 -43 49.8268 54.4436   4
   0   1 -43 26.5398 51.3004   4
   0  -1 -44 128.360 69.5876   3
   0   1 -44 230.715 84.4033   3
   0  -1  44 265.923 83.3830   1
   0   1  44 267.355 86.2672   2
   0   1  44 221.124 78.4150   1
   0   1 -44 204.250 73.1029   4
   0  -1 -44 224.834 72.4064   4
   0  -1  44 163.391 67.0964   2
   0   1  45 139.430 83.1280   2
   0   1 -45 47.4315 61.9274   4
   0  -1  45 127.093 65.4641   2
   0  -1 -45 47.1356 75.1204   3
   0  -1 -45-0.13662 56.3820   4
   0   1  45 72.2500 56.1047   1
   0  -1  45 122.199 74.2761   1
   0   1 -45 107.469 70.4188   3
   0   1 -46 20.6013 51.1960   4
   0  -1 -46-92.9861 79.4428   3
   0   1  46 4.39759 60.5911   1
   0   1  46-45.9538 66.5424   2
   0  -1 -46 11.3088 57.7859   4
   0   1 -46-4.12483 70.1991   3
   0  -1  46 26.7434 63.0932   1
   0  -1  46 71.0291 74.6675   2
   0  -1 -47-105.246 70.8660   3
   0  -1  47-35.2889 74.8851   2
   0   1  47-63.8203 67.0490   1
   0   1 -47 22.3253 63.6672   3
   0   1  47 95.5784 80.6007   2
   0  -1 -47 80.2785 62.0549   4
   0  -1  47 145.383 82.4167   1
   0   1 -47-15.8802 55.9798   4
   0   1 -48-66.8633 65.1179   4
   0  -1  48-104.556 78.6971   1
   0  -1 -48-82.2990 81.5139   3
   0   1  48 157.490 91.5959   2
   0  -1  48 14.3259 68.3995   2
   0   1 -48-53.7044 70.5832   3
   0  -1 -48 6.64656 57.2618   4
   0   1  48 0.89163 62.4705   1
   0   1  49-27.7599 61.7389   1
   0  -1 -49 35.3775 68.0576   3
   0   1 -49 12.1840 62.2792   3
   0   1  49-23.3355 78.3123   2
   0  -1  49-58.3837 76.6298   1
   0   1 -49 49.2038 58.2215   4
   0  -1 -49 28.2116 55.5818   4
   0  -1  49 119.202 74.5949   2
   0  -1  50 148.158 89.6738   1
   0  -1 -50 39.7586 56.7861   4
   0   1  50 143.901 91.6434   2
   0   1 -50 182.772 82.1928   4
   0   1  50 140.523 84.2026   1
   0  -1  50 127.846 82.5167   2
   0   1 -50 250.814 92.2093   3
   0  -1 -50 127.715 81.0993   3
   0  -1 -51 130.299 86.1115   3
   0  -1  51 66.1080 81.4876   1
   0  -1 -51 25.7296 60.5082   4
   0   1  51 62.3643 80.4403   2
   0   1 -51-5.46705 64.9249   4
   0   1 -51 24.3060 74.3716   3
   0   1  51 103.063 67.6908   1
   0  -1  51 52.7407 69.6055   2
   0   1  52 124.145 85.9207   2
   0   1 -52-92.7260 78.8558   3
   0  -1 -52-70.3311 80.5248   3
   0   1 -52 28.8423 60.4961   4
   0  -1  52-110.855 92.8491   1
   0  -1 -52-16.6834 65.4835   4
   0   1 -53-28.9448 62.1688   4
   0   1  53-23.4843 92.4672   2
   0   1 -53 94.0891 84.2461   3
   0  -1  53 128.446 93.5358   1
   0  -1 -53 86.1167 71.1577   4
   0  -1 -53 105.027 85.0812   3
   0  -1  54 189.314 107.921   1
   0   1 -54 440.292 101.814   4
   0   1 -54 399.209 114.256   3
   0   1  54 200.436 96.5825   2
   0  -1 -54 350.426 106.852   3
   0   1 -55 117.476 83.1980   3
   0   1  55 18.1736 84.2668   2
   0  -1  55 23.1979 79.6730   1
   0  -1 -55 51.5019 78.8835   3
   0  -1  56 236.132 108.527   1
   0   1  56 302.869 119.705   2
   0   1 -56 86.0824 93.2605   3
   0  -1 -56 22.6672 76.8237   3
   0   1  57 100.230 100.604   2
   0  -1 -57 199.752 99.3130   3
   0   1 -57 221.427 95.0445   3
   0  -1  57 324.378 120.921   1
   0  -1 -58 124.712 99.5459   3
   0   1 -58-89.3216 90.2681   3
   0   1  58 49.5590 91.3224   2
   0   1  59 344.150 127.037   2
   0  -1 -59 204.947 102.406   3
   0   2   0 25004.1 212.410   2
   0  -2   0 25444.6 303.149   4
   0   2   0 24950.7 282.661   3
   0  -2   0 25199.2 202.123   1
   0  -2   0 24775.5 210.609   2
   0   2   0 25672.0 209.043   1
   0  -2  -1 72011.9 377.404   2
   0  -2   1 74239.8 367.664   1
   0   2  -1 72227.5 369.238   1
   0  -2  -1 70915.5 476.023   4
   0   2  -1 76029.8 497.163   3
   0   2  -1 72876.6 330.366   2
   0  -2   1 73417.7 343.381   2
   0  -2  -1 72590.6 316.843   1
   0   2   1 71105.8 374.166   2
   0  -2   1 74602.8 498.345   4
   0   2   1 70803.0 319.529   1
   0  -2  -2 11909.9 120.323   1
   0  -2  -2 11774.7 161.539   2
   0   2   2 12186.0 169.959   2
   0  -2   2 12270.3 207.990   4
   0  -2   2 11837.2 156.734   1
   0   2   2 12069.6 199.251   3
   0  -2   2 11661.7 133.953   2
   0   2   2 12150.8 126.220   1
   0   2  -2 12017.3 126.177   2
   0  -2  -2 12189.1 198.661   4
   0   2  -2 11794.8 197.654   3
   0   2  -2 11853.3 158.847   1
   0   2  -3 1333.74 75.5154   3
   0  -2   3 1289.51 76.3089   4
   0   2   3 1268.94 73.0383   3
   0  -2   3 1082.14 42.9323   2
   0   2   3 1270.93 64.0913   2
   0  -2  -3 1299.30 76.3910   4
   0   2  -3 1276.98 41.9468   2
   0  -2   3 1324.38 60.4614   1
   0  -2  -3 1250.22 38.6266   1
   0   2   3 1180.78 38.6785   1
   0   2   4 765.416 52.0281   2
   0   2  -4 882.182 63.9904   3
   0  -2  -4 711.999 28.3142   1
   0   2   4 615.522 27.3648   1
   0  -2   4 450.618 29.5246   2
   0   2  -4 705.633 31.5795   2
   0   2  -4 766.660 60.2032   4
   0  -2  -4 751.662 59.4878   4
   0   2   4 713.614 56.8234   3
   0  -2   4 722.313 49.0372   1
   0  -2  -5 223.713 41.3405   4
   0   2  -5 301.350 45.5686   3
   0   2  -5 236.650 39.6573   4
   0   2   5 259.110 42.5519   3
   0  -2   5 203.861 33.9220   1
   0   2  -5 237.757 21.4378   2
   0  -2   5 149.263 18.8000   2
   0   2   5 203.578 38.1523   2
   0   2  -6 284.471 23.5344   2
   0   2   6 339.144 43.7083   2
   0   2  -6 432.946 47.9577   3
   0   2  -6 307.947 22.3182   2
   0   2   6 414.456 48.9414   3
   0  -2   6 404.638 45.1397   1
   0  -2  -6 388.951 47.2535   4
   0   2  -6 389.533 46.9470   4
   0   2   7 159.037 37.3279   3
   0   2  -7 147.483 35.2395   4
   0   2  -7 112.128 19.0068   2
   0   2  -7 165.331 40.5571   3
   0  -2  -7 162.136 37.9648   4
   0   2   7 138.403 38.7189   2
   0  -2   7 171.369 37.4651   1
   0   2  -7 110.174 15.5096   2
   0   2  -8 601.493 59.8404   3
   0  -2   8 376.140 49.8694   1
   0  -2  -8 476.518 50.2628   4
   0   2  -8 381.734 23.9093   2
   0   2   8 485.834 55.7162   3
   0   2  -8 506.246 50.9905   4
   0   2   8 462.746 53.3783   2
   0   2  -8 433.347 25.9578   2
   0  -2   9 519.910 53.6367   1
   0   2  -9 413.662 25.2214   2
   0  -2  -9 513.745 52.3270   4
   0   2   9 253.158 20.9098   1
   0   2   9 559.399 57.0873   2
   0   2  -9 467.021 54.3986   3
   0   2   9 482.949 56.1121   3
   0   2   9 415.377 21.5388   1
   0   2  -9 402.173 48.7724   4
   0   2  -9 351.263 24.6931   2
   0  -2 -10 527.554 53.0757   4
   0   2  10 456.120 55.0284   3
   0  -2  10 461.800 52.0639   1
   0   2 -10 415.852 26.4544   2
   0   2 -10 604.911 60.0329   3
   0  -2  10 467.805 28.1179   2
   0   2  10 453.255 25.0035   1
   0   2 -10 497.511 53.2902   4
   0   2  10 278.346 21.4916   1
   0   2  10 467.448 56.5246   2
   0  -2  11 1252.26 44.0745   2
   0   2  11 1273.46 42.5411   1
   0   2 -11 1368.41 86.5829   3
   0   2  11 1303.41 83.5581   2
   0  -2 -11 1303.29 77.2416   4
   0   2 -11 1351.98 78.1083   4
   0  -2  11 1181.99 78.8115   1
   0   2 -11 1142.02 42.3755   2
   0   2  11 1205.60 82.2093   3
   0   2  12 146.895 44.3700   3
   0   2  12 148.677 21.4610   1
   0   2 -12 136.890 22.1436   2
   0   2 -12 103.377 33.1073   4
   0   2  12 103.323 19.1395   1
   0   2  12 84.1950 37.4314   2
   0  -2  12 106.936 21.7370   2
   0   2 -12 185.595 47.6343   3
   0  -2  12 124.962 36.9464   1
   0  -2 -12 177.373 42.3491   4
   0   2  13 456.616 61.2603   2
   0   2  13 427.942 55.9461   3
   0  -2  13 431.757 57.2755   1
   0   2 -13 387.699 57.5516   3
   0  -2 -13 315.188 44.8064   4
   0   2  13 241.860 25.1220   1
   0   2 -13 417.561 31.9107   2
   0   2 -13 356.234 50.3004   4
   0  -2  13 371.690 32.0579   2
   0   2  13 458.107 32.8307   1
   0   2 -14 122.288 34.8158   4
   0   2 -14 231.652 48.7407   3
   0   2  14 247.020 29.4962   1
   0  -2  14 150.619 24.5232   2
   0  -2  14 288.267 51.3847   1
   0   2  14 263.599 58.4475   2
   0   2 -14 175.068 25.6569   2
   0   2  14 108.067 21.8444   1
   0   2  14 236.656 48.1745   3
   0  -2 -14 241.558 45.4700   4
   0   2  15 1595.92 102.621   2
   0  -2 -15 1468.35 100.837   3
   0   2 -15 1834.24 105.119   3
   0   2 -15 1528.54 89.3563   4
   0  -2  15 1473.84 97.0411   1
   0  -2  15 1705.95 65.2061   2
   0  -2 -15 1740.35 92.3810   4
   0   2  15 1706.29 63.1959   1
   0  -2  16 1575.06 66.9609   2
   0   2 -16 1568.62 94.0037   4
   0  -2  16 1453.45 98.2357   1
   0  -2 -16 1688.62 96.0672   4
   0   2 -16 1547.01 98.7255   3
   0  -2 -16 1596.51 107.262   3
   0   2  16 1667.31 66.4308   1
   0   2  16 1584.43 104.117   2
   0  -2  17 324.983 53.6382   1
   0  -2 -17 341.465 52.2148   4
   0   2 -17 355.712 61.4190   3
   0  -2 -17 369.677 64.2388   3
   0  -2  17 330.980 38.5317   2
   0   2  17 356.426 39.1640   1
   0   2  17 315.946 60.7217   2
   0   2 -17 258.547 48.8438   4
   0  -2  18 820.241 56.1019   2
   0   2 -18 848.475 73.2517   4
   0  -2 -18 739.752 80.2074   3
   0  -2 -18 792.425 75.3209   4
   0   2 -18 834.573 82.4372   3
   0   2  18 790.505 53.9405   1
   0  -2  18 784.414 80.7397   1
   0   2  18 852.222 85.0342   2
   0  -2 -19 3555.98 143.482   4
   0   2  19 2909.76 148.451   2
   0  -2 -19 3470.46 170.279   3
   0   2  19 3712.42 114.064   1
   0  -2  19 3510.57 109.431   2
   0  -2  19 2610.17 136.838   1
   0   2 -19 3520.59 141.530   4
   0   2 -19 3681.21 157.288   3
   0  -2 -20 192.048 55.9558   3
   0  -2  20 244.559 55.9763   1
   0  -2  20 308.481 41.7681   2
   0   2  20 325.648 66.3552   2
   0   2 -20 333.332 60.9057   3
   0  -2 -20 347.573 56.4940   4
   0   2 -20 322.222 54.1242   4
   0   2  20 282.440 41.5146   1
   0  -2 -21 279.712 50.3168   4
   0  -2  21 347.375 43.6732   2
   0  -2 -21 278.990 67.8014   3
   0   2 -21 334.931 58.2602   3
   0  -2  21 386.522 67.5900   1
   0   2  21 410.085 73.1144   2
   0   2 -21 331.243 54.9275   4
   0   2  21 332.888 44.1048   1
   0  -2 -22 229.833 50.7158   4
   0  -2  22 235.066 41.7302   2
   0   2 -22 234.419 47.8611   4
   0   2  22 253.639 40.8983   1
   0   2  22 203.571 61.3413   2
   0  -2  22 208.015 59.9261   1
   0  -2 -22 239.485 63.7369   3
   0   2 -22 234.849 52.7208   3
   0  -2 -23-5.28264 39.4798   4
   0   2  23-17.4861 43.1649   2
   0  -2  23 60.5259 31.5870   2
   0   2 -23 2.15984 33.7226   4
   0  -2 -23-56.6620 47.7807   3
   0   2 -23 80.4205 43.7573   3
   0   2  23 17.1637 27.9991   1
   0  -2  23 23.4958 43.6475   1
   0   2 -24 197.798 50.4680   3
   0   2 -24 230.084 46.8854   4
   0  -2 -24 267.688 54.8301   4
   0  -2 -24 285.500 67.4180   3
   0   2  24 220.292 62.1832   2
   0   2  24 308.303 47.4702   1
   0  -2  24 268.497 42.6339   2
   0  -2  24 282.014 62.4641   1
   0  -2  25 454.839 54.4032   2
   0  -2  25 436.271 70.7093   1
   0  -2 -25 413.108 64.1838   4
   0   2  25 442.338 53.8686   1
   0   2 -25 328.034 63.9080   3
   0  -2 -25 314.592 72.8286   3
   0   2 -25 547.382 69.7466   4
   0   2  25 488.688 79.7240   2
   0  -2 -26 63.9205 42.2734   4
   0   2  26 80.7665 35.9881   1
   0   2 -26 118.476 48.8009   3
   0  -2  26 97.5738 37.6665   2
   0   2  26 199.693 64.6669   2
   0  -2 -26-14.9906 48.4798   3
   0   2 -26 24.8915 35.2764   4
   0  -2  26 72.0373 48.6488   1
   0  -2  27 246.206 49.7001   2
   0  -2  27 250.766 65.2741   1
   0   2  27 235.930 65.4074   2
   0   2 -27 227.544 53.9713   4
   0  -2 -27 191.610 61.8550   3
   0   2 -27 145.653 50.4175   3
   0  -2 -27 189.163 50.6543   4
   0   2  27 240.950 46.6908   1
   0  -2 -28 603.521 87.3919   3
   0   2 -28 669.120 79.7165   4
   0  -2  28 666.087 92.6265   1
   0   2  28 598.621 65.0490   1
   0   2  28 538.929 85.2606   2
   0   2 -28 627.680 80.7204   3
   0  -2 -28 617.751 76.6624   4
   0  -2  28 664.547 68.7650   2
   0  -2 -29 364.367 64.6126   4
   0   2 -29 400.603 65.5925   4
   0   2 -29 342.716 71.1941   3
   0   2  29 301.644 73.0248   2
   0  -2 -29 431.700 78.4023   3
   0   2  29 341.308 55.5878   1
   0  -2  29 335.264 79.7607   1
   0  -2  29 463.913 63.3621   2
   0  -2  30 1811.24 112.010   2
   0   2  30 1602.31 139.019   2
   0   2  30 1591.25 105.355   1
   0  -2  30 1409.51 129.194   1
   0   2 -30 1513.96 123.958   3
   0   2 -30 1603.84 116.817   4
   0  -2 -30 1535.35 118.226   4
   0  -2 -30 1352.19 129.279   3
   0   2  31 302.000 61.1749   1
   0  -2 -31 111.697 43.8707   4
   0   2 -31 208.085 62.5397   3
   0   2 -31 141.075 48.8000   4
   0   2  31 166.646 67.2284   2
   0  -2  31 179.384 48.8145   2
   0  -2 -31 253.969 74.6807   3
   0  -2  31 120.331 62.8097   1
   0  -2  32 1122.07 94.6112   2
   0  -2  32 1005.54 117.720   1
   0  -2 -32 1014.97 104.491   4
   0   2 -32 1029.60 101.654   4
   0   2  32 1139.05 124.651   2
   0   2  32 1094.67 93.4591   1
   0  -2 -32 1161.24 123.827   3
   0   2 -32 1076.56 112.614   3
   0   2  33 390.666 63.0980   1
   0  -2 -33 457.127 79.0103   4
   0  -2 -33 343.934 82.6331   3
   0  -2  33 340.478 81.1711   1
   0   2 -33 297.305 66.4921   4
   0   2 -33 272.184 67.1447   3
   0   2  33 290.228 77.0602   2
   0  -2  33 418.576 66.8785   2
   0   2  34 634.677 78.8730   1
   0  -2  34 762.372 108.247   1
   0   2 -34 691.883 90.9683   3
   0  -2  34 696.793 78.4670   2
   0  -2 -34 652.567 99.8723   3
   0   2 -34 802.727 95.5417   4
   0   2  34 977.597 123.284   2
   0  -2 -34 808.441 97.2304   4
   0   2 -35 600.692 83.5420   4
   0  -2 -35 684.556 103.869   3
   0  -2 -35 537.380 82.3900   4
   0   2 -35 567.269 91.2101   3
   0   2  35 654.177 83.1001   1
   0   2  35 708.822 109.388   2
   0  -2  35 706.643 86.5334   2
   0  -2  35 610.153 100.046   1
   0   2 -36 2370.45 166.817   3
   0  -2 -36 2503.01 181.881   3
   0  -2  36 2366.93 178.688   1
   0   2  36 2365.29 142.322   1
   0   2  36 2779.67 195.427   2
   0  -2  36 2599.92 153.073   2
   0   2 -36 2477.05 159.667   4
   0  -2 -36 2610.31 167.932   4
   0   2  37 496.670 77.8837   1
   0   2 -37 550.670 87.9098   3
   0   2 -37 484.574 82.1394   4
   0  -2 -37 518.796 99.0375   3
   0  -2  37 512.550 98.7337   1
   0   2  37 563.797 105.769   2
   0  -2  37 473.546 77.7052   2
   0  -2 -37 542.721 88.8508   4
   0   2 -38 735.848 97.8783   4
   0   2 -38 796.016 107.769   3
   0  -2 -38 898.595 109.813   4
   0   2  38 992.068 131.548   2
   0  -2  38 792.312 113.548   1
   0   2  38 767.189 95.0497   1
   0  -2 -38 881.330 122.181   3
   0  -2  38 919.173 100.517   2
   0   2 -39 30.1378 56.4682   3
   0  -2  39 94.9580 73.0445   1
   0   2 -39 104.552 53.9449   4
   0   2  39 49.0436 48.0794   1
   0  -2  39 54.7792 49.6244   2
   0  -2 -39-13.3242 48.8270   4
   0  -2 -39 133.464 70.5891   3
   0   2  39 57.7102 60.4399   2
   0  -2 -40 186.184 67.8269   4
   0   2 -40 159.853 67.9322   3
   0  -2 -40-6.16960 59.2074   3
   0   2  40 162.881 60.8032   1
   0   2 -40 161.052 63.5056   4
   0   2  40 85.1625 71.1886   2
   0  -2  40 234.212 72.0953   2
   0  -2  40 217.719 87.6035   1
   0  -2  41 51.2419 53.4752   2
   0   2 -41-104.971 63.9920   3
   0  -2  41 50.3223 71.2414   1
   0   2  41-9.52506 66.2026   2
   0   2  41-10.7320 48.6512   1
   0  -2 -41-38.6177 67.6794   3
   0   2 -41-44.0163 58.5179   4
   0  -2 -41-4.01239 51.1047   4
   0   2  42 59.7420 53.7039   1
   0  -2  42 44.9360 72.7992   1
   0  -2  42 68.2275 61.7582   2
   0  -2 -42-156.666 72.5480   3
   0   2 -42-46.4859 58.7186   4
   0   2  42 63.9641 78.7590   2
   0  -2 -42 108.054 61.3344   4
   0   2 -42 16.4078 63.8536   3
   0  -2 -43-79.7506 67.1966   3
   0   2 -43-28.7215 53.5442   4
   0   2  43-45.4846 72.2685   2
   0  -2  43-3.99966 65.0868   1
   0  -2  43 101.799 61.7306   2
   0   2 -43-17.0479 55.0340   3
   0  -2 -43 73.2948 57.2139   4
   0   2  43-14.9826 51.6538   1
   0   2 -44 109.800 72.0985   3
   0  -2 -44 86.3251 65.6057   4
   0  -2  44-43.3083 56.9829   2
   0   2 -44 3.06100 52.2773   4
   0  -2 -44-3.02314 59.9916   3
   0   2  44 46.8252 77.8084   2
   0  -2  44-58.9157 65.8190   1
   0   2 -45 161.060 72.4041   3
   0   2 -45 80.1341 60.3304   4
   0  -2 -45 40.4218 63.1330   3
   0   2  45 49.8657 73.3562   2
   0  -2 -45-10.8072 58.0156   4
   0  -2  45-2.17672 77.7315   1
   0   2 -46 131.818 77.5532   3
   0  -2 -46 26.2044 77.5139   3
   0   2  46 4.52923 70.3443   2
   0   2 -46-36.7893 54.0651   4
   0  -2 -46 92.7165 65.9165   4
   0  -2  46 27.2025 64.8519   1
   0   2 -47 96.4857 68.6332   4
   0  -2 -47-42.8838 58.5464   4
   0  -2 -47-60.9344 68.9386   3
   0   2 -47 149.904 79.0246   3
   0  -2  47-39.0612 82.7082   1
   0   2  47-67.1096 88.2402   2
   0  -2  48 108.221 90.2440   1
   0   2 -48 77.6407 65.5014   4
   0   2  48-94.1944 93.3805   2
   0   2 -48 238.788 91.5675   3
   0  -2 -48-60.9698 67.4479   4
   0  -2 -48 23.4049 70.6941   3
   0   2  49-104.053 89.4642   2
   0  -2  49-52.3265 72.2279   1
   0   2 -49 25.9082 63.4985   4
   0  -2 -49-68.6497 78.8489   3
   0   2 -49 79.9973 74.1801   3
   0  -2 -49 3.19324 61.3184   4
   0   2 -50 138.034 73.5445   4
   0  -2 -50 13.2879 63.1894   4
   0   2  50-16.8160 84.8187   2
   0  -2 -50 68.3013 87.4036   3
   0  -2  50 33.7775 77.2329   1
   0   2 -50-21.0104 68.9563   3
   0   2 -51 130.423 82.6502   3
   0   2 -51-13.6596 58.8737   4
   0  -2 -51 53.4954 64.8092   4
   0   2  51 45.5429 79.9347   2
   0  -2 -51 27.7748 71.7867   3
   0  -2  51-36.6412 87.0628   1
   0  -2 -52 75.9613 73.9138   4
   0   2 -52-11.8506 70.3011   3
   0  -2 -52-44.3244 79.7582   3
   0   2 -52-88.2283 68.2947   4
   0   2  52 33.4324 89.8843   2
   0  -2  52 91.4773 91.7551   1
   0  -2  53-34.6848 87.1357   1
   0   2 -53-160.484 88.5554   3
   0   2  53 35.9593 91.2506   2
   0  -2 -53-53.6176 71.6003   4
   0  -2 -53 58.6123 88.1239   3
   0   2 -53-107.655 73.4481   4
   0   2 -54 72.4347 75.2720   3
   0   2  54 217.317 109.897   2
   0  -2 -54 85.1451 82.8963   3
   0  -2  54 118.078 99.7104   1
   0   2 -54 63.7788 71.8553   4
   0  -2  55 158.227 97.6449   1
   0   2  55 328.751 109.215   2
   0   2 -55 162.920 98.9263   3
   0  -2 -55 20.2316 80.7045   3
   0   2  56 954.152 169.067   2
   0  -2  56 730.977 157.156   1
   0  -2 -56 584.812 132.477   3
   0   2 -56 550.780 130.440   3
   0  -2 -57 32.1943 88.7256   3
   0   2  57 145.061 104.745   2
   0   2 -57 128.833 89.9625   3
   0   2 -58 23.1974 87.8761   3
   0  -2 -58-24.1035 86.5828   3
   0  -3   0 28.2660 22.3003   1
   0   3   0 11.2230 22.9484   2
   0   3   0 32.8683 37.8475   3
   0  -3   0-19.3308 34.5963   4
   0  -3  -1 9.38035 20.5939   1
   0  -3  -1 15.8346 34.9359   4
   0   3  -1 38.3175 23.4450   2
   0   3   1 3.56052 23.7948   2
   0   3  -1 31.1763 37.0511   3
   0   3   1-1.62564 35.4940   3
   0  -3   1-37.4144 36.3841   4
   0  -3   1 16.8532 23.2212   1
   0   3  -2 27.6547 35.0137   3
   0   3   2 32.3008 38.4594   3
   0   3  -2-23.6899 21.1779   2
   0  -3  -2-12.0273 18.6813   1
   0   3   2 29.3608 20.2698   1
   0  -3   2-7.56672 22.8680   2
   0  -3   2 18.3039 25.7919   1
   0   3   2 2.90046 27.5960   2
   0  -3   2 11.1367 35.1968   4
   0  -3  -2-23.4281 35.8739   4
   0   3   3-4.01852 37.8752   3
   0   3   3 8.06470 18.2081   1
   0  -3   3 13.0955 20.7285   2
   0  -3  -3 4.84666 17.2660   1
   0   3  -3 18.2658 19.6506   2
   0   3  -3 51.5404 40.8802   3
   0  -3  -3 1.70076 35.0751   4
   0  -3   3-8.74318 39.3996   4
   0  -3   3 20.5019 29.9740   1
   0   3   3 8.89775 28.6597   2
   0  -3   4 125.879 33.8580   1
   0   3  -4 108.530 21.8168   2
   0   3   4 54.2890 39.3081   3
   0  -3   4 83.7546 24.4060   2
   0   3   4 79.1581 34.1902   2
   0  -3  -4 87.1688 19.8248   1
   0  -3  -4 26.7453 36.8572   4
   0  -3   4 101.781 43.1172   4
   0   3  -4 100.234 44.6345   3
   0   3   4 72.7260 19.5287   1
   0   3  -5 5.23753 35.5543   3
   0   3  -5 32.4668 17.7120   2
   0  -3  -5-9.63743 15.7274   1
   0  -3  -5-16.8593 37.0031   4
   0  -3   5 32.3170 43.7579   4
   0  -3   5-1.31748 21.0139   2
   0   3   5-58.4870 42.6105   3
   0   3   5 23.9144 14.0113   1
   0   3   5 10.1138 33.4812   2
   0  -3   5-22.3633 30.1197   1
   0   3  -6 162.370 21.2945   2
   0  -3   6 191.542 41.4496   1
   0  -3   6 153.687 44.3087   4
   0   3   6 262.024 50.7293   3
   0   3  -6 182.103 46.7309   3
   0   3   6 195.253 41.8463   2
   0  -3  -6 185.081 20.3420   1
   0   3   6 182.231 18.3732   1
   0  -3  -6 199.302 45.9111   4
   0  -3   6 91.6627 22.9148   2
   0   3  -7 40.4263 38.4166   3
   0  -3  -7 14.9070 11.4469   1
   0   3  -7 20.2136 15.7092   2
   0  -3   7 37.5899 32.7796   1
   0  -3  -7 77.7571 41.4218   4
   0   3   7 12.5685 10.9299   1
   0   3   7 29.2211 34.2142   3
   0   3   7 13.1849 32.1064   2
   0  -3   7 6.28935 14.9156   2
   0  -3  -8 213.541 47.6325   4
   0   3  -8 161.295 20.5772   2
   0   3  -8 147.773 19.1022   2
   0   3  -8 205.070 52.3336   3
   0   3   8 230.780 49.8701   3
   0   3   8 131.980 13.9102   1
   0   3  -8 234.349 49.9510   4
   0  -3  -8 150.412 14.6293   1
   0  -3   8 271.874 46.0008   1
   0   3   8 166.741 42.3454   2
   0  -3   9 71.4395 38.6502   1
   0   3  -9 69.1621 14.6052   2
   0  -3  -9 91.7581 39.1280   4
   0   3  -9 129.381 42.5461   4
   0   3   9 126.193 44.2014   3
   0   3  -9 41.8400 39.7733   3
   0   3   9 68.9130 38.2254   2
   0   3  -9 72.8414 15.7689   2
   0   3 -10 9.39324 10.7209   2
   0   3  10 15.3864 36.8603   2
   0   3 -10 48.8357 38.8784   3
   0   3 -10 31.7107 14.4993   2
   0   3 -10 95.4239 39.8118   4
   0  -3 -10 37.8293 37.0420   4
   0   3  10 64.3061 39.2976   3
   0  -3  10 26.1320 34.4045   1
   0   3 -11 48.3698 15.7939   2
   0   3  11 100.244 40.9119   3
   0   3 -11 75.3173 14.1674   2
   0  -3 -11 21.8821 37.1736   4
   0   3 -11 105.005 40.8307   4
   0  -3  11 120.893 42.8068   1
   0   3 -11 138.175 48.1966   3
   0   3  11 73.2971 36.2794   2
   0  -3 -12 70.1644 40.5633   4
   0   3 -12 20.5094 10.7986   2
   0   3 -12 25.4822 14.6565   2
   0  -3  12 34.5488 35.9963   1
   0   3  12 27.0188 37.9015   3
   0   3  12 22.1816 9.37783   1
   0   3 -12 60.1493 41.1065   3
   0   3  12 46.6505 44.4705   2
   0   3 -12 69.1189 39.1747   4
   0   3  12 22.0413 8.77671   1
   0   3  13 106.145 44.4812   2
   0   3 -13 111.967 42.1099   4
   0   3 -13 190.477 52.5626   3
   0  -3 -13 47.4909 37.7127   4
   0  -3  13 98.5969 41.4417   1
   0   3  13 48.4602 10.4621   1
   0   3 -13 62.1967 14.8200   2
   0   3  13 53.3767 11.6256   1
   0   3 -13 59.3899 17.2416   2
   0   3  13 35.9245 41.6130   3
   0   3 -14 558.392 71.6572   3
   0   3  14 515.707 67.4478   3
   0  -3  14 470.089 65.4906   1
   0  -3 -14 533.415 66.0490   4
   0   3 -14 501.578 32.4021   2
   0   3 -14 476.619 59.1251   4
   0   3  14 471.350 65.3997   2
   0   3 -14 375.288 26.6561   2
   0   3  14 246.391 20.3224   1
   0   3  14 296.602 20.3337   1
   0   3 -15-11.0129 34.4707   4
   0   3  15 2.67655 40.5495   2
   0   3  15 4.69951 37.0814   3
   0   3  15-22.7780 13.1724   1
   0   3 -15-4.72063 38.6499   3
   0   3  15 7.39977 11.8998   1
   0   3 -15-5.35542 14.8140   2
   0  -3 -15 3.82758 34.0049   4
   0  -3  15 39.5857 35.3099   1
   0   3 -15 9.73831 15.4175   2
   0   3 -16 145.954 45.1082   4
   0  -3  16 140.630 47.9518   1
   0   3 -16 111.185 43.2584   3
   0   3  16 89.1722 17.1758   1
   0   3  16 38.8993 15.0679   1
   0   3 -16 108.245 19.8960   2
   0   3 -16 75.4487 16.8807   2
   0   3  16 196.933 49.3257   2
   0  -3 -16 172.608 46.5335   4
   0   3  16 127.109 50.9116   3
   0   3  17 20.6037 14.3188   1
   0  -3 -17 62.2469 35.1035   4
   0   3  17 46.5449 16.4876   1
   0   3  17 53.7863 37.1131   3
   0  -3  17 49.1575 19.4909   2
   0   3 -17 41.0314 18.8192   2
   0   3 -17 12.3426 37.2032   4
   0   3 -17 55.1610 40.3981   3
   0  -3  17 3.45375 37.8813   1
   0   3  17 79.9512 52.4440   2
   0   3  18 451.337 35.4390   1
   0   3  18 604.328 79.2627   2
   0   3 -18 659.110 78.6838   3
   0   3 -18 601.139 67.1862   4
   0   3  18 461.180 69.5047   3
   0  -3 -18 612.425 69.5394   4
   0  -3  18 563.810 39.9133   2
   0  -3  18 595.342 74.7929   1
   0  -3  19 1237.11 102.000   1
   0  -3  19 1191.05 56.0554   2
   0  -3 -19 1164.58 90.2557   4
   0   3 -19 1323.78 96.4430   4
   0   3  19 1169.27 102.452   2
   0   3 -19 1279.47 107.807   3
   0   3  19 1152.87 54.8271   1
   0  -3 -20 263.053 65.9344   3
   0  -3  20 241.729 32.9855   2
   0   3  20 253.045 61.0590   2
   0  -3  20 188.818 53.8811   1
   0   3 -20 266.682 63.5804   3
   0   3 -20 239.445 54.4840   4
   0  -3 -20 180.103 46.6571   4
   0   3  20 171.611 27.7711   1
   0  -3  21 61.8189 23.8097   2
   0   3 -21 43.0136 42.4219   4
   0   3  21 59.7608 49.8319   2
   0  -3 -21 40.7241 49.4762   3
   0  -3  21 25.4091 41.2691   1
   0  -3 -21 102.728 45.4880   4
   0   3  21 51.3100 22.3042   1
   0   3 -21 32.6613 39.4043   3
   0  -3 -22 139.200 50.7758   4
   0  -3  22 85.2057 44.2295   1
   0  -3  22 116.015 30.0340   2
   0  -3 -22 118.893 54.3212   3
   0   3  22 127.012 56.9165   2
   0   3 -22 108.580 49.7897   3
   0   3 -22 152.887 48.8930   4
   0   3  22 88.4466 26.4304   1
   0  -3  23 25.1597 48.4894   1
   0   3  23 41.0741 27.5416   1
   0   3  23 3.66282 44.0985   2
   0  -3 -23 46.0812 44.3322   4
   0   3 -23 44.4272 41.6969   4
   0  -3 -23-36.7777 52.9543   3
   0  -3  23 7.68372 24.9505   2
   0   3 -23 25.6955 40.5457   3
   0  -3  24 2538.62 101.609   2
   0   3  24 2534.99 162.225   2
   0   3 -24 2304.65 145.003   3
   0  -3  24 2069.44 144.156   1
   0  -3 -24 2227.04 153.063   3
   0  -3 -24 2380.50 137.279   4
   0   3 -24 2441.23 140.057   4
   0   3  24 2408.25 93.2056   1
   0   3 -25 199.155 53.1944   4
   0  -3  25 100.046 50.1408   1
   0  -3  25 214.426 40.1703   2
   0   3  25 244.404 64.3483   2
   0  -3 -25 263.956 59.8210   4
   0   3  25 117.743 29.5099   1
   0   3 -25 183.174 56.4500   3
   0  -3 -25 205.510 68.7943   3
   0  -3 -26 154.809 60.9491   3
   0  -3  26 98.8354 34.6229   2
   0   3  26 110.577 32.2112   1
   0   3 -26 61.6176 43.5606   3
   0  -3 -26 135.833 48.5832   4
   0  -3  26 86.6991 52.7969   1
   0   3 -26 63.1241 46.9640   4
   0   3  26 164.035 61.3927   2
   0  -3  27 204.093 42.5441   2
   0  -3  27 115.612 61.5085   1
   0   3  27 264.830 42.0855   1
   0   3 -27 178.567 47.9150   4
   0   3 -27 253.008 63.8231   3
   0  -3 -27 234.815 67.0553   3
   0  -3 -27 241.262 59.8139   4
   0   3  27 238.635 73.0495   2
   0  -3 -28 129.062 70.0491   3
   0  -3  28 108.616 59.0591   1
   0   3  28 163.367 39.5787   1
   0   3  28 21.1272 50.2420   2
   0  -3  28 67.0381 32.6382   2
   0   3 -28 85.1771 48.0056   4
   0  -3 -28 178.790 59.9762   4
   0   3 -28 88.2262 51.6458   3
   0  -3 -29 727.223 103.290   3
   0   3 -29 816.345 91.8631   4
   0  -3  29 905.286 74.9080   2
   0   3  29 844.066 70.1946   1
   0  -3  29 846.356 106.125   1
   0   3 -29 830.438 100.289   3
   0  -3 -29 942.212 101.234   4
   0   3  29 951.075 115.360   2
   0  -3  30 228.485 72.1086   1
   0   3 -30 308.791 65.9047   4
   0   3 -30 222.928 60.5303   3
   0   3  30 252.747 46.0241   1
   0  -3 -30 357.540 71.7785   4
   0  -3 -30 282.280 79.7211   3
   0   3  30 282.514 76.9658   2
   0  -3  30 297.004 50.9169   2
   0  -3  31 514.153 63.7342   2
   0  -3  31 373.970 81.2812   1
   0   3 -31 381.492 72.2668   4
   0   3  31 558.121 97.0569   2
   0  -3 -31 585.728 96.7542   3
   0   3 -31 360.973 77.9810   3
   0   3  31 468.111 60.4119   1
   0  -3 -31 287.714 67.3058   4
   0  -3 -32 590.111 87.1976   4
   0   3 -32 498.819 86.4444   3
   0   3  32 581.836 67.0360   1
   0  -3 -32 594.518 105.532   3
   0   3  32 782.545 117.897   2
   0  -3  32 626.412 70.9412   2
   0  -3  32 509.521 92.8560   1
   0   3 -32 644.829 86.0074   4
   0  -3  33 135.902 64.4598   1
   0  -3 -33 79.8358 67.1803   3
   0   3  33 100.767 39.5631   1
   0   3 -33 197.856 67.1977   3
   0  -3 -33 64.1884 52.6716   4
   0   3  33 211.421 77.8301   2
   0   3 -33 118.557 52.5235   4
   0  -3  33 114.789 44.6915   2
   0   3  34 554.123 106.593   2
   0  -3 -34 501.138 101.330   3
   0  -3  34 579.053 105.832   1
   0   3 -34 541.350 92.0804   3
   0  -3  34 714.724 78.1713   2
   0  -3 -34 534.945 90.3515   4
   0   3 -34 500.954 84.6707   4
   0   3  34 439.768 61.4776   1
   0   3 -35 9.70294 44.8976   4
   0  -3 -35 30.6998 59.9681   3
   0   3 -35 38.7712 55.6891   3
   0  -3  35 9.11588 56.8679   1
   0  -3  35 63.7045 45.0586   2
   0  -3 -35 72.9175 57.9535   4
   0   3  35 118.943 75.3380   2
   0  -3 -36 169.387 66.6282   4
   0   3 -36 176.766 64.4368   4
   0   3 -36 124.296 58.0379   3
   0  -3  36 302.700 87.8020   1
   0  -3 -36 57.6383 58.6608   3
   0   3  36 261.268 79.4104   2
   0   3 -37 520.839 87.0264   4
   0  -3  37 597.197 112.748   1
   0  -3 -37 594.400 99.8951   4
   0  -3 -37 624.324 111.180   3
   0   3 -37 622.632 105.217   3
   0   3  37 526.899 105.772   2
   0   3  38 89.7978 75.1036   2
   0  -3 -38-134.405 80.9692   3
   0  -3  38 53.2716 64.8879   1
   0   3 -38 12.2031 46.5353   4
   0  -3 -38-74.0797 65.4965   4
   0   3 -38-47.6693 60.5203   3
   0  -3  39 511.498 108.175   1
   0   3  39 564.537 114.105   2
   0   3 -39 558.198 102.879   3
   0  -3 -39 602.220 98.5881   4
   0  -3 -39 636.683 112.370   3
   0   3 -39 576.158 90.8436   4
   0  -3  40 67.4183 71.5341   1
   0  -3 -40 244.946 72.4189   4
   0   3  40 120.874 71.6633   2
   0   3 -40 194.965 68.8060   4
   0  -3 -40 159.672 79.9665   3
   0   3 -40 203.036 75.2448   3
   0  -3  41 258.846 90.4783   1
   0  -3 -41 91.3869 64.7168   4
   0   3 -41 2.51345 62.4922   3
   0   3  41 146.831 81.4029   2
   0  -3 -41 208.923 84.5843   3
   0   3 -41 108.487 61.0678   4
   0  -3 -42 161.150 71.3599   4
   0   3 -42 100.455 65.6138   3
   0  -3  42 29.8748 70.6795   1
   0  -3 -42 59.6448 62.4840   3
   0   3 -42 83.5888 59.4496   4
   0   3  42 19.2011 66.5923   2
   0   3  43 73.9405 70.9585   2
   0   3 -43 38.6700 59.5846   3
   0  -3  43 67.8150 81.7282   1
   0  -3 -43 139.378 79.5408   3
   0  -3 -43 74.1352 58.7310   4
   0   3 -43 32.0807 57.6649   4
   0  -3 -44 51.8973 68.9068   3
   0  -3 -44 70.8092 65.6914   4
   0   3  44-14.8579 75.4128   2
   0  -3  44 5.36380 72.6249   1
   0   3 -44 100.703 79.1084   3
   0   3 -44-13.0189 54.3905   4
   0   3 -45 17.4019 58.5683   3
   0  -3  45 207.338 95.9354   1
   0   3 -45 13.0377 53.0451   4
   0   3  45 45.2124 75.6849   2
   0  -3 -45 74.7516 70.0076   4
   0  -3 -45 118.178 76.9094   3
   0   3  46 175.896 103.857   2
   0  -3  46 181.331 97.4056   1
   0  -3 -46 56.5452 66.1645   4
   0  -3 -46-24.8988 69.7166   3
   0   3 -46 131.228 69.0987   4
   0   3 -46 199.130 86.3894   3
   0  -3  47 60.5151 92.8370   1
   0  -3 -47 12.3581 61.3198   4
   0  -3 -47-36.7869 68.1963   3
   0   3 -47 38.9530 64.2220   3
   0   3  47 93.0208 85.5197   2
   0   3 -47-63.7852 68.0977   4
   0  -3 -48-105.270 74.4435   4
   0  -3  48 10.4633 74.7459   1
   0   3 -48 56.9946 61.1457   4
   0   3  48 12.2857 82.8383   2
   0   3 -48-96.5415 70.4538   3
   0  -3 -48 80.2009 78.1329   3
   0   3 -49 101.452 79.2351   3
   0  -3 -49-24.5539 77.1899   3
   0  -3  49-158.589 91.9629   1
   0  -3 -49-36.1106 72.7636   4
   0   3 -49 78.3271 65.2803   4
   0   3  49 55.9775 96.4950   2
   0   3 -50-0.76727 59.8437   4
   0   3  50-9.93077 82.8883   2
   0  -3 -50 143.106 82.9394   3
   0   3 -50 22.2272 70.4741   3
   0  -3 -50 44.7065 65.9430   4
   0  -3  50 6.00585 92.0864   1
   0  -3 -51 223.676 105.785   3
   0   3  51-1.34794 87.8553   2
   0   3 -51 6.18942 72.7636   3
   0  -3 -51 81.0463 74.3392   4
   0   3 -51 49.2531 64.3110   4
   0  -3  51 87.6487 98.7343   1
   0   3 -52 44.0298 66.4768   4
   0   3  52-63.7062 86.3530   2
   0  -3 -52 191.429 97.7333   3
   0   3 -52 159.928 86.3211   3
   0  -3 -52-76.2246 80.8244   4
   0  -3  52-73.1198 97.5105   1
   0   3 -53 33.4212 74.2793   3
   0   3  53 1.95289 89.3931   2
   0   3 -53 44.9107 69.9508   4
   0  -3 -53-27.7437 81.6827   3
   0  -3  54-22.4659 87.4302   1
   0   3 -54 171.045 88.0509   3
   0  -3 -54 190.821 96.2161   3
   0   3 -54 33.5939 69.8245   4
   0   3  54 134.852 98.9159   2
   0   3 -55-38.6593 75.8682   3
   0  -3 -55 24.1681 85.7329   3
   0   3 -56 254.218 107.534   3
   0  -3 -56 129.285 104.042   3
   0   4   0 16.0842 36.8998   3
   0  -4   0 14.7183 24.0901   1
   0  -4   0-2.94315 38.0270   4
   0   4   0 17.2013 25.0329   2
   0   4   1 1.23613 26.8483   2
   0   4  -1 97.7960 30.9720   2
   0   4   1 101.934 47.1504   3
   0  -4  -1 75.5097 41.3073   4
   0  -4  -1 36.6149 23.1074   1
   0  -4   1 11.7152 45.2456   4
   0  -4   1 114.624 32.0300   1
   0   4  -1 51.0785 37.3298   3
   0  -4   2 458.809 70.1139   4
   0   4   2 382.126 46.5562   2
   0  -4  -2 451.419 67.4778   4
   0   4  -2 368.536 63.3291   3
   0  -4  -2 381.052 36.6561   1
   0  -4   2 370.975 44.0707   1
   0   4   2 336.774 58.8742   3
   0   4  -2 408.973 42.9165   2
   0  -4  -3 116.822 25.2074   1
   0   4  -3 142.531 28.7486   2
   0  -4   3 129.675 34.7845   1
   0   4   3 142.927 40.8108   2
   0   4  -3 207.583 53.1399   3
   0  -4  -3 113.861 44.1245   4
   0  -4   3 64.5939 43.8742   4
   0   4   3 128.348 47.5134   3
   0  -4  -4 640.033 74.8672   4
   0   4  -4 891.414 87.6925   3
   0  -4   4 865.409 87.4497   4
   0  -4  -4 809.513 46.4701   1
   0   4   4 900.955 85.7691   3
   0   4  -4 773.857 49.9935   2
   0   4   4 807.154 68.0288   2
   0  -4   4 808.762 63.1240   1
   0  -4  -5 135.949 24.9028   1
   0  -4  -5 120.832 40.0521   4
   0   4   5 148.198 39.2879   2
   0  -4   5 181.691 62.3173   4
   0   4   5 205.053 54.7539   3
   0   4  -5 179.247 54.6036   3
   0   4   5 43.5484 18.6378   1
   0  -4   5 76.7451 32.8654   1
   0   4  -5 120.694 28.7109   2
   0   4  -6 1430.81 57.7757   2
   0   4   6 1425.59 92.6068   2
   0   4   6 1336.70 104.359   3
   0  -4  -6 1340.56 101.601   4
   0  -4   6 1511.88 113.004   4
   0  -4  -6 1385.18 54.3329   1
   0  -4   6 1388.47 85.9056   1
   0   4  -6 1408.59 105.407   3
   0   4   6 886.554 43.4548   1
   0  -4   7 345.377 35.6028   2
   0  -4   7 529.863 71.4310   4
   0   4   7 551.909 62.5849   2
   0   4   7 600.180 76.3208   3
   0   4  -7 540.908 36.0574   2
   0  -4  -7 528.982 32.6995   1
   0   4   7 323.074 26.3448   1
   0  -4   7 609.485 60.5298   1
   0  -4  -7 580.227 72.5919   4
   0   4  -7 532.518 68.1802   3
   0   4   8 9.74535 35.0793   2
   0  -4   8 18.6410 34.1217   1
   0   4   8 2.44176 38.2581   3
   0  -4   8 62.7725 46.7230   4
   0   4  -8 29.7432 16.4405   2
   0   4   8-3.27181 11.6574   1
   0   4  -8-58.0600 50.0570   3
   0  -4  -8 12.4596 12.5457   1
   0  -4  -8-29.0701 44.3950   4
   0  -4   8 20.8498 17.4344   2
   0  -4   9 1112.99 83.9768   1
   0   4  -9 910.031 39.9006   2
   0   4   9 1225.11 98.1240   3
   0   4   9 1052.97 86.1505   2
   0  -4  -9 1097.62 88.8097   4
   0   4  -9 568.836 34.7681   2
   0  -4   9 1074.88 101.564   4
   0   4   9 316.279 20.4758   1
   0  -4  -9 865.342 33.2294   1
   0   4  -9 1178.76 99.8220   3
   0   4 -10 1101.28 99.8998   3
   0  -4  10 965.827 82.3191   1
   0   4 -10 493.844 29.6024   2
   0  -4 -10 1020.83 89.5694   4
   0   4  10 1167.60 99.5445   3
   0   4  10 1019.42 81.9239   2
   0   4 -10 829.046 36.2175   2
   0  -4  10 1104.26 104.800   4
   0  -4 -10 733.497 25.9203   1
   0  -4  11 193.259 51.0517   1
   0   4  11 241.338 52.6714   2
   0   4 -11 122.061 16.0514   2
   0   4  11 214.413 59.8140   3
   0   4 -11 86.5903 14.0100   2
   0   4 -11 194.056 58.9486   3
   0  -4 -11 225.416 51.3483   4
   0   4 -12 66.1884 38.2091   4
   0   4 -12 73.2034 47.4433   3
   0   4 -12-0.58097 8.76777   2
   0  -4 -12 44.7754 39.1926   4
   0   4 -12 26.1454 9.91299   2
   0   4  12 44.2755 38.1946   3
   0   4  12 5.42622 38.0367   2
   0  -4  12 75.4580 41.8562   1
   0   4 -13 261.923 19.4629   2
   0   4 -13 532.820 73.1884   4
   0   4 -13 447.732 66.9670   3
   0  -4 -13 596.003 76.5996   4
   0   4  13 476.563 70.1926   3
   0  -4  13 457.750 63.9116   1
   0   4 -13 181.540 16.9671   2
   0   4  13 544.847 74.4492   2
   0  -4  14 1868.38 118.166   1
   0   4 -14 1256.98 37.5653   2
   0   4 -14 1857.67 119.638   4
   0   4 -14 1730.75 123.304   3
   0  -4 -14 1798.61 118.543   4
   0   4  14 1728.51 121.616   3
   0   4  14 1991.05 127.033   2
   0   4 -15 148.321 14.8649   2
   0   4 -15 440.538 66.0659   4
   0   4 -15 267.023 19.5885   2
   0   4  15 435.531 70.0511   2
   0   4  15 472.907 75.1132   3
   0  -4 -15 448.568 66.3288   4
   0   4 -15 434.928 69.5343   3
   0  -4  15 404.530 67.9704   1
   0  -4  16 403.708 65.4335   1
   0   4  16 460.018 74.1290   3
   0   4 -16 404.283 72.7936   3
   0   4  16 444.032 73.9437   2
   0   4 -16 278.368 21.0195   2
   0  -4 -16 544.616 73.1910   4
   0   4 -16 387.006 65.3926   4
   0   4 -16 145.892 15.0771   2
   0   4 -17 117.690 14.8334   2
   0  -4 -17 386.937 66.2439   4
   0   4 -17 391.376 65.9407   4
   0   4  17 338.481 65.8731   3
   0   4  17 316.344 65.3239   2
   0   4 -17 215.959 21.4750   2
   0   4 -17 353.524 67.2491   3
   0  -4  17 366.107 62.8600   1
   0  -4 -18 42.2333 40.6151   4
   0   4 -18 9.09300 11.0328   2
   0  -4  18 35.9620 40.9591   1
   0   4  18-5.09311 48.8813   3
   0   4 -18 93.3639 52.8659   3
   0   4 -18 25.0772 11.2060   2
   0   4 -18 58.2337 42.9968   4
   0   4  18-6.01943 44.7144   2
   0  -4  19 92.5241 52.5128   1
   0   4  19 41.2367 41.6732   2
   0   4 -19 26.5130 14.2156   2
   0   4 -19 24.5690 38.9530   3
   0  -4 -19 7.81695 37.5387   4
   0   4 -19 70.6166 42.7624   4
   0   4  19 67.4205 47.2285   3
   0   4 -20 526.680 36.8897   2
   0  -4  20 1014.63 103.071   1
   0   4  20 990.743 106.075   3
   0  -4 -20 867.676 89.1138   4
   0   4 -20 953.894 93.3577   4
   0   4  20 1004.02 108.197   2
   0   4 -20 1010.26 103.818   3
   0  -4  21 63.6618 43.8910   1
   0   4 -21 148.915 52.6468   4
   0  -4 -21 79.7969 50.9716   4
   0   4 -21 137.264 53.4943   3
   0   4 -21 57.8974 18.1023   2
   0   4  21-0.16696 45.4110   2
   0   4  21 28.1593 10.2840   1
   0   4  21 18.1841 47.3697   3
   0  -4  22 24.2813 43.9474   1
   0   4  22 87.9787 57.2932   3
   0   4 -22 127.305 52.8167   3
   0   4 -22 117.333 50.4764   4
   0  -4 -22 127.717 48.3265   4
   0   4  22 33.3490 12.0714   1
   0   4  22 69.3565 51.2541   2
   0   4 -22 90.8952 22.5102   2
   0  -4 -23 200.149 68.3575   3
   0   4 -23 115.735 42.8538   4
   0  -4 -23 112.013 55.7580   4
   0  -4  23 99.2248 53.5251   1
   0   4 -23 94.3714 20.2350   2
   0   4 -23 184.845 65.3157   3
   0   4  23 151.772 65.7661   2
   0   4 -24 260.217 64.5604   3
   0  -4 -24 382.181 67.9870   4
   0  -4  24 230.163 64.1799   1
   0  -4 -24 230.033 69.5580   3
   0   4  24 278.889 74.3432   2
   0   4 -24 257.244 59.1679   4
   0   4 -25 464.084 83.3322   3
   0   4  25 393.273 85.3806   2
   0   4 -25 347.870 69.4910   4
   0  -4 -25 369.631 70.8573   4
   0  -4  25 407.705 82.5709   1
   0  -4 -25 294.860 83.4214   3
   0  -4  26 423.051 82.5477   1
   0   4  26 309.344 80.0945   2
   0   4 -26 449.502 75.4677   4
   0   4 -26 331.678 71.1645   3
   0  -4 -26 349.991 92.4412   3
   0  -4 -26 394.983 71.9362   4
   0   4 -27 28.9781 45.9470   4
   0  -4 -27 49.0803 45.2290   4
   0   4  27 105.537 64.6346   2
   0  -4  27 38.6382 54.8574   1
   0  -4 -27 124.206 74.5899   3
   0   4 -27 136.909 55.6671   3
   0  -4 -28 362.997 74.2838   4
   0   4 -28 324.847 74.3444   3
   0   4 -28 296.003 67.5432   4
   0   4  28 298.617 81.5484   2
   0  -4  28 290.579 81.2128   1
   0  -4 -28 333.538 95.0529   3
   0  -4  29 133.755 63.1215   1
   0   4  29 172.754 76.6097   2
   0   4 -29 120.843 49.4874   4
   0  -4 -29 96.9303 65.3943   3
   0   4 -29 162.761 67.8985   3
   0  -4 -29 148.780 63.7311   4
   0   4  30 244.121 76.2878   2
   0  -4 -30 315.802 75.8871   4
   0   4 -30 236.779 70.8199   3
   0  -4  30 273.993 79.9295   1
   0  -4 -30 241.720 80.6409   3
   0   4 -30 209.169 61.7436   4
   0  -4 -31 1327.02 151.570   3
   0   4 -31 1413.15 128.356   4
   0  -4  31 1377.68 140.302   1
   0   4  31 1329.16 147.615   2
   0  -4 -31 1397.76 131.417   4
   0   4 -31 1492.80 142.439   3
   0  -4  32 263.037 84.8137   1
   0  -4 -32 259.177 87.3498   3
   0   4 -32 208.336 66.6804   3
   0  -4 -32 230.304 67.8513   4
   0   4  32 233.140 88.1814   2
   0   4 -32 148.449 59.2525   4
   0   4  33 1389.64 148.907   2
   0  -4 -33 1557.50 138.870   4
   0  -4  33 1351.46 148.403   1
   0  -4 -33 1229.74 151.364   3
   0   4 -33 1459.80 130.388   4
   0   4 -33 1298.49 138.253   3
   0  -4 -34 430.858 106.377   3
   0  -4  34 405.561 93.1967   1
   0   4 -34 393.126 83.1398   3
   0  -4 -34 427.198 85.0506   4
   0   4  34 588.896 117.571   2
   0   4 -34 322.689 72.1723   4
   0  -4  35 901.113 130.671   1
   0  -4 -35 893.293 130.520   3
   0   4  35 817.019 127.597   2
   0   4 -35 939.627 112.982   4
   0  -4 -35 1097.06 124.446   4
   0   4 -35 882.391 116.591   3
   0  -4  36 942.072 137.026   1
   0  -4 -36 952.207 135.334   3
   0   4 -36 870.796 121.036   3
   0   4 -36 924.463 115.724   4
   0  -4 -36 871.059 114.220   4
   0   4  36 684.592 118.138   2
   0  -4 -37 2076.30 193.595   3
   0  -4 -37 2087.61 165.681   4
   0   4 -37 1945.64 167.809   3
   0   4  37 1968.22 189.895   2
   0  -4  37 1879.15 179.179   1
   0   4 -37 1894.94 154.306   4
   0   4 -38 152.782 70.9709   3
   0  -4 -38 152.672 84.3304   3
   0   4 -38 164.958 67.3546   4
   0  -4 -38 265.779 83.9922   4
   0  -4  38 13.6417 67.7379   1
   0   4  38 137.105 85.7997   2
   0  -4 -39 373.322 104.569   3
   0   4 -39 362.261 88.5240   3
   0  -4  39 187.355 85.5555   1
   0   4  39 278.159 97.2046   2
   0   4 -39 400.826 86.7089   4
   0  -4 -39 376.912 89.2920   4
   0   4 -40 174.108 69.8727   4
   0  -4  40 192.022 83.0197   1
   0   4  40 142.287 82.4962   2
   0   4 -40 242.898 84.3944   3
   0  -4 -40 53.2293 67.7492   4
   0  -4 -40 111.353 88.7776   3
   0  -4  41 32.6359 80.1023   1
   0   4 -41 144.137 73.7887   3
   0   4  41-79.3759 81.0031   2
   0  -4 -41 74.7833 66.4472   4
   0  -4 -41 137.626 78.4995   3
   0   4 -41 77.6667 63.9800   4
   0   4 -42 64.2082 65.7179   3
   0  -4  42 109.894 81.0354   1
   0  -4 -42 79.1143 71.8709   4
   0   4  42 51.0217 77.4430   2
   0  -4 -42 40.0276 75.1243   3
   0   4 -42-22.3425 58.2478   4
   0   4 -43 15.9087 62.1124   3
   0   4  43 79.6824 79.3979   2
   0  -4  43 173.475 96.3841   1
   0   4 -43 9.54461 57.3862   4
   0  -4 -43 151.049 87.5304   3
   0  -4 -43-96.2616 75.5199   4
   0   4 -44 47.8102 68.4632   3
   0  -4 -44-28.5588 67.5420   4
   0  -4  44-120.420 84.0187   1
   0   4  44 17.2852 79.8319   2
   0  -4 -44 140.176 92.0437   3
   0   4 -44 10.8770 54.0177   4
   0  -4 -45 262.390 91.7622   4
   0  -4  45-10.9947 78.5297   1
   0  -4 -45 211.964 99.3354   3
   0   4 -45 104.957 65.5979   4
   0   4  45 186.166 94.3080   2
   0   4 -45 70.3213 77.1961   3
   0   4 -46 58.0940 78.6882   3
   0   4 -46 12.1953 59.2174   4
   0   4  46-68.6202 88.2494   2
   0  -4  46 121.814 97.9827   1
   0  -4 -46 52.0920 78.4156   3
   0  -4 -46 224.985 85.9709   4
   0   4 -47 149.456 82.0725   3
   0  -4 -47 13.3635 66.8580   4
   0  -4  47-73.0523 88.7356   1
   0  -4 -47-16.5071 78.9416   3
   0   4 -47 74.9277 70.8039   4
   0   4  47 146.701 98.1080   2
   0   4  48-4.78943 90.1540   2
   0  -4 -48 22.5643 66.9372   4
   0  -4  48 9.58006 84.7785   1
   0   4 -48 6.51133 71.6888   3
   0   4 -48 18.3045 57.4979   4
   0  -4 -48-74.7649 84.4994   3
   0   4  49-3.39452 84.8219   2
   0  -4 -49 75.7682 85.9311   3
   0  -4  49-28.0652 101.082   1
   0  -4 -49 45.5807 81.2377   4
   0   4 -49-12.0162 61.3487   4
   0   4 -49 99.7840 80.7857   3
   0   4 -50-5.36105 66.1710   4
   0  -4 -50 55.7584 87.7278   3
   0  -4 -50 96.4472 77.1841   4
   0   4  50 194.587 101.396   2
   0  -4  50 209.763 115.472   1
   0   4 -50-6.07392 71.8443   3
   0  -4 -51 15.3575 81.8873   3
   0   4  51 242.778 106.523   2
   0   4 -51 159.016 81.1498   4
   0   4 -51-22.2851 76.3846   3
   0  -4  51 104.827 86.4160   1
   0   4 -52 192.830 89.2768   3
   0   4 -52 208.815 80.6237   4
   0  -4 -52 149.647 100.678   3
   0   4 -53-71.5067 82.7419   3
   0  -4 -53 18.9398 86.8293   3
   0   4 -53 10.4076 67.4492   4
   0   4 -54 48.4005 83.7743   3
   0  -4 -54 134.664 94.2434   3
   0   4 -54 58.4579 76.3135   4
   0  -5   0 25.4284 46.2492   4
   0   5   0 20.8637 29.7111   2
   0  -5   0-8.15257 27.4250   1
   0   5   0 14.4783 42.4334   3
   0   5  -1 33.1815 42.7754   3
   0   5   1 4.57432 27.7269   2
   0  -5  -1-37.2636 28.1898   1
   0  -5   1-30.8443 45.8071   4
   0  -5  -1 50.7370 46.1144   4
   0   5  -1 8.65557 24.8990   2
   0  -5   1-3.30385 25.8923   1
   0   5   1 15.5064 42.0363   3
   0   5   2-37.7317 35.1539   2
   0  -5   2 24.2511 27.6806   1
   0  -5  -2-1.66859 43.3760   4
   0  -5   2 37.1695 53.6126   4
   0  -5  -2 16.6165 23.0347   1
   0   5   2-27.9548 42.2492   3
   0   5  -2 5.94137 46.2508   3
   0   5  -2 47.8731 28.1642   2
   0   5  -3 22.5491 43.0593   3
   0  -5   3-13.9604 30.0789   1
   0   5   3 62.2643 34.5963   2
   0  -5  -3-13.5125 42.3712   4
   0  -5   3 22.4574 46.3139   4
   0   5   3 0.29369 43.6500   3
   0   5  -3 12.6600 26.3376   2
   0  -5  -3 62.2826 27.4166   1
   0  -5  -4 57.7961 25.0717   1
   0   5  -4 57.3443 27.4844   2
   0   5   4 64.7344 47.3421   3
   0  -5   4 59.2943 35.3044   1
   0   5  -4-8.47695 41.1452   3
   0  -5   4 11.7086 44.4799   4
   0  -5  -4 71.2581 47.6709   4
   0   5   4 34.6659 32.4511   2
   0  -5   5-10.5239 51.6663   4
   0   5  -5 105.226 49.2038   3
   0  -5  -5 57.1399 23.8665   1
   0   5   5 58.0284 49.7930   3
   0   5   5 38.3353 34.0167   2
   0  -5   5 23.8308 28.4012   1
   0   5  -5 75.1224 25.9488   2
   0  -5  -5 91.5342 47.9193   4
   0   5  -6-90.6782 45.7294   3
   0  -5  -6-40.0122 39.7294   4
   0   5   6-58.7368 48.6564   3
   0  -5  -6 22.6317 21.3844   1
   0   5  -6 11.0779 19.7515   2
   0   5   6-1.63311 34.7557   2
   0  -5   6-20.3674 45.8526   4
   0  -5   6 14.5195 31.1219   1
   0  -5   7-2.67210 32.2112   1
   0  -5   7-15.4120 45.8408   4
   0   5  -7 16.2654 18.6850   2
   0  -5  -7 12.5613 42.1490   4
   0   5   7 48.2116 46.4284   3
   0   5   7-33.3030 35.4868   2
   0  -5  -7 6.95404 17.8036   1
   0   5  -7 84.2420 48.2155   3
   0   5   8 80.1685 52.6420   3
   0   5  -8 8.03811 15.9837   2
   0   5   8 25.5509 35.6697   2
   0  -5  -8-10.2531 40.5718   4
   0   5  -8 33.4886 46.3521   3
   0  -5  -8 33.5099 16.5474   1
   0  -5   8 12.2970 44.3463   4
   0  -5   8 27.6376 35.6129   1
   0  -5   9 97.2116 48.4170   4
   0  -5  -9 62.3327 47.6478   4
   0   5  -9 45.2719 16.0795   2
   0   5   9 69.7882 44.9699   3
   0   5   9 26.9380 36.5275   2
   0  -5   9 70.1175 38.0431   1
   0  -5  -9 33.9389 13.3926   1
   0   5  -9 55.7496 48.6223   3
   0  -5 -10 324.511 64.4073   4
   0  -5  10 272.614 54.9870   1
   0   5  10 301.673 66.4022   3
   0   5 -10 338.730 70.3868   3
   0  -5 -10 224.826 18.5325   1
   0   5  10 360.520 66.5248   2
   0   5 -10 226.768 24.3264   2
   0  -5  10 321.775 71.3858   4
   0   5 -11 52.5856 13.6063   2
   0   5  11 155.035 48.6946   2
   0  -5 -11-13.5050 48.9562   4
   0  -5  11 127.688 66.5522   4
   0   5  11 149.311 59.6360   3
   0   5 -11 50.2774 42.8403   3
   0  -5  11 138.038 47.4244   1
   0   5  12 5.96806 42.1924   3
   0   5 -12 7.20324 8.55124   2
   0  -5  12 42.1150 40.0227   1
   0  -5 -12 65.1125 51.3490   4
   0  -5  12 71.8032 54.9321   4
   0   5 -12 44.1853 41.2083   3
   0   5  12 39.4934 38.9210   2
   0  -5  13 276.127 69.3489   4
   0  -5  13 351.047 62.0608   1
   0   5  13 298.375 65.2090   2
   0   5 -13 364.269 69.8239   3
   0   5  13 482.163 79.4376   3
   0  -5 -13 362.139 68.4518   4
   0   5  14 104.488 49.7095   2
   0  -5 -14 199.866 60.6264   4
   0   5 -14 149.657 54.3177   3
   0  -5  14 197.128 53.3758   1
   0   5  14 170.555 56.0629   3
   0  -5  14 98.3572 59.0986   4
   0  -5 -15 66.6105 45.8513   4
   0   5  15 75.0990 47.8172   3
   0   5 -15 12.7369 47.1147   3
   0   5  15 93.1937 51.9677   2
   0  -5  15-1.36357 48.5951   4
   0  -5  15 99.2011 50.9679   1
   0   5  16 76.3199 50.5392   3
   0  -5  16 50.7635 48.5246   1
   0  -5  16 42.5734 56.4960   4
   0   5 -16 41.0476 45.9517   3
   0   5  16-7.70974 46.5351   2
   0  -5 -16 19.7735 42.4791   4
   0   5  17-35.8781 46.8680   3
   0   5  17-31.1242 57.9828   2
   0  -5  17 0.24967 40.2390   1
   0  -5 -17 34.5275 48.9323   4
   0   5 -17 46.7731 54.0807   3
   0   5  18-13.0940 46.9910   2
   0   5 -18 18.7331 42.4080   4
   0   5 -18 21.4295 49.0631   3
   0  -5 -18-14.3593 46.2078   4
   0   5  18 45.1478 49.1369   3
   0  -5  18-1.29342 44.5142   1
   0   5 -19 2.32318 44.8977   4
   0  -5 -19-0.74594 43.6737   4
   0   5 -19-17.7552 46.2200   3
   0  -5  19 24.8570 43.4083   1
   0   5  19 40.1706 48.7231   3
   0   5  19-9.58976 48.9370   2
   0  -5 -20 116.258 58.3660   4
   0  -5  20 57.5021 57.9754   1
   0   5  20 143.968 52.7731   2
   0   5  20 25.6722 48.0152   3
   0   5 -20-6.49484 44.9781   3
   0   5 -20-11.4205 44.6715   4
   0   5  21-19.4183 50.8229   2
   0   5 -21 67.4952 52.6074   4
   0   5 -21 37.3045 49.3775   3
   0   5  21 58.7366 56.7823   3
   0  -5  21 90.9762 57.3202   1
   0  -5 -21-17.2428 48.9835   4
   0  -5 -22 31.1878 46.2109   4
   0   5  22 17.0055 58.4429   3
   0   5 -22-107.595 55.1131   4
   0   5 -22 10.3252 49.8104   3
   0  -5  22 28.1739 59.3405   1
   0   5  22 20.8975 57.7603   2
   0  -5 -23 397.979 75.0526   4
   0   5  23 427.720 84.5176   2
   0  -5  23 394.761 84.5852   1
   0   5 -23 511.793 90.8580   3
   0   5  23 480.925 92.7244   3
   0   5 -23 411.660 79.3052   4
   0   5 -24 533.919 88.1707   3
   0  -5 -24 509.111 81.0060   4
   0   5  24 484.024 91.2871   3
   0   5 -24 580.122 85.7821   4
   0   5  24 512.350 93.4632   2
   0  -5  24 433.919 91.9540   1
   0  -5 -25 487.757 84.8704   4
   0  -5  25 463.397 88.9876   1
   0   5 -25 503.484 91.8302   3
   0   5  25 503.061 97.9605   2
   0   5 -25 486.855 85.8485   4
   0   5 -26 151.795 62.9347   4
   0   5  26 211.647 72.7470   2
   0  -5  26 133.655 70.0108   1
   0   5 -26 60.7741 52.9714   3
   0  -5 -26 85.6756 49.8222   4
   0  -5 -26 30.9612 68.4589   3
   0  -5 -27 240.332 71.9183   4
   0   5 -27 214.294 75.0482   3
   0   5  27 71.0607 66.9808   2
   0   5 -27 26.2059 49.8304   4
   0  -5 -27 72.5379 71.3771   3
   0  -5  27 64.2654 58.4145   1
   0  -5 -28 648.193 122.102   3
   0  -5 -28 668.339 93.7897   4
   0  -5  28 870.183 119.867   1
   0   5 -28 674.765 103.103   3
   0   5  28 656.137 107.222   2
   0   5 -28 723.622 100.690   4
   0  -5 -29 710.047 128.741   3
   0   5  29 567.607 102.971   2
   0   5 -29 609.494 96.4585   4
   0  -5 -29 803.862 107.225   4
   0   5 -29 558.085 99.2438   3
   0  -5  29 591.159 103.423   1
   0  -5  30 77.0791 61.5176   1
   0   5 -30-15.8034 52.4241   3
   0   5  30 141.136 77.3700   2
   0  -5 -30 42.1657 56.4255   4
   0  -5 -30-41.0067 67.5445   3
   0   5 -30 52.9592 53.1527   4
   0   5 -31 202.558 70.7753   3
   0  -5  31 33.5391 59.0616   1
   0  -5 -31 96.8093 59.2929   4
   0   5  31 92.8200 62.7372   2
   0   5 -31 135.023 61.8710   4
   0  -5 -31 37.3279 65.5726   3
   0  -5 -32-0.41845 57.6694   4
   0   5  32-3.42862 67.3614   2
   0   5 -32 70.5799 65.1808   3
   0  -5  32-1.38290 64.2882   1
   0   5 -32-77.5042 58.9156   4
   0  -5 -32 42.5140 72.9561   3
   0  -5  33 506.404 104.847   1
   0  -5 -33 465.325 113.893   3
   0  -5 -33 472.913 95.6151   4
   0   5 -33 432.893 95.2523   3
   0   5 -33 380.352 80.4701   4
   0   5  33 352.838 94.3366   2
   0   5 -34 153.623 75.6279   3
   0  -5  34 69.2675 75.6494   1
   0  -5 -34 127.593 82.7101   3
   0  -5 -34 100.590 66.8885   4
   0   5 -34 161.046 65.8716   4
   0   5  34 114.337 81.0588   2
   0  -5 -35 137.432 97.2200   3
   0  -5  35 79.7227 77.5960   1
   0   5 -35 102.653 65.3099   3
   0  -5 -35-64.1538 62.3960   4
   0   5  35 158.014 89.3769   2
   0   5 -35 19.7647 52.0712   4
   0   5 -36 43.6479 61.3487   3
   0   5 -36 68.2951 60.1151   4
   0   5  36 96.9549 74.9300   2
   0  -5  36-36.5648 68.5450   1
   0  -5 -36 110.662 83.3245   3
   0  -5 -36 191.280 74.8181   4
   0  -5  37-4.05759 68.7321   1
   0  -5 -37 32.4710 60.8193   4
   0   5  37 55.3705 77.6935   2
   0   5 -37 101.504 72.8578   3
   0  -5 -37 100.804 78.4901   3
   0   5 -37 58.5607 60.9386   4
   0   5 -38 354.220 96.3698   3
   0   5  38 372.687 105.398   2
   0  -5 -38 261.913 109.547   3
   0  -5  38 216.066 87.5782   1
   0   5 -38 471.983 92.7054   4
   0  -5 -38 291.535 84.5932   4
   0  -5  39-0.69998 69.9502   1
   0  -5 -39-20.6722 75.4840   3
   0   5 -39-19.4674 66.3598   3
   0   5 -39 56.0359 62.3889   4
   0  -5 -39-21.5856 65.3735   4
   0   5  39 80.3461 86.3633   2
   0   5 -40 137.853 75.3491   3
   0  -5 -40 438.159 121.571   3
   0  -5 -40 187.722 82.8198   4
   0   5  40 135.510 83.0533   2
   0  -5  40 119.106 77.3838   1
   0   5 -40 159.690 72.0889   4
   0   5  41-70.0264 92.4091   2
   0   5 -41 31.1577 68.0028   3
   0  -5 -41 253.331 89.9347   4
   0  -5  41 159.968 89.1573   1
   0  -5 -41-104.195 89.0061   3
   0   5 -41 50.5575 60.2800   4
   0  -5 -42 104.780 89.4035   3
   0  -5  42 78.9563 81.7177   1
   0   5  42 6.66426 76.8476   2
   0   5 -42 65.6970 61.5335   4
   0  -5 -42-37.0032 71.6152   4
   0   5 -42 32.1392 67.2911   3
   0   5  43-83.5523 94.6463   2
   0   5 -43 72.6922 67.3514   3
   0  -5 -43 14.7932 68.0363   4
   0   5 -43 37.6610 65.5477   4
   0  -5 -43 240.880 103.428   3
   0  -5  43-40.4897 77.2771   1
   0  -5  44 154.599 103.457   1
   0  -5 -44 40.4020 68.3981   4
   0   5  44 36.9693 85.9742   2
   0   5 -44 156.173 74.2561   4
   0   5 -44 68.7317 71.2365   3
   0  -5 -44-59.3954 87.4596   3
   0   5 -45-6.88385 60.6265   4
   0  -5 -45 106.149 88.6582   3
   0   5  45 33.1014 82.2119   2
   0  -5  45-26.1922 83.8501   1
   0  -5 -45 43.1306 72.2917   4
   0   5 -45 39.5333 75.3452   3
   0  -5 -46 191.706 99.6790   3
   0  -5  46-106.345 91.4156   1
   0   5  46-56.7293 87.2643   2
   0   5 -46 6.45472 63.0998   4
   0   5 -46 37.6987 72.2116   3
   0  -5 -46-55.2087 71.5115   4
   0  -5 -47 43.7608 81.1317   4
   0  -5 -47 55.8344 89.8325   3
   0   5 -47 16.3067 63.5953   4
   0   5 -47-86.3878 80.3276   3
   0   5  47-152.508 105.279   2
   0  -5  47 21.2692 86.1303   1
   0  -5  48-79.0447 86.8733   1
   0   5 -48-53.0180 76.8705   3
   0   5  48 143.522 115.301   2
   0   5 -48 41.6336 68.1540   4
   0  -5 -48-47.6838 88.9408   3
   0  -5 -48 43.2791 75.7155   4
   0  -5 -49 9.98752 77.2511   4
   0   5 -49 46.4128 79.9480   3
   0  -5 -49 58.6551 101.193   3
   0   5 -49-7.11678 65.4171   4
   0   5 -50 12.3543 75.2635   3
   0   5 -50 13.2226 65.5567   4
   0  -5 -50-29.2381 86.2008   3
   0   5 -51-26.1269 68.1720   4
   0   5 -51-30.1882 86.5127   3
   0  -5 -51-38.6102 93.5046   3
   0   5 -52-25.0702 73.3476   4
   0   5 -52 97.5287 86.2010   3
   0  -6   0 822.358 105.223   4
   0   6   0 804.834 108.659   3
   0  -6   0 756.984 67.4086   1
   0   6   0 793.805 71.6245   2
   0  -6   1 1585.72 92.7825   1
   0  -6   1 1657.68 141.116   4
   0   6  -1 1465.89 87.4079   2
   0   6   1 1635.54 138.724   3
   0  -6  -1 1577.65 87.7814   1
   0  -6  -1 1725.24 141.501   4
   0   6  -1 1561.70 136.068   3
   0   6   1 1555.94 97.2772   2
   0   6  -2 93.5227 38.1952   2
   0   6   2 208.056 72.1995   3
   0   6  -2-12.7455 51.3985   3
   0   6   2 93.8746 43.8125   2
   0  -6  -2 238.986 77.2046   4
   0  -6  -2 35.7687 29.2439   1
   0  -6   2 113.075 39.7033   1
   0  -6   2 61.1912 55.2472   4
   0   6   3 382.576 61.0283   2
   0   6  -3 331.270 48.8333   2
   0  -6   3 678.627 102.169   4
   0  -6  -3 481.834 87.3441   4
   0   6   3 417.224 75.4420   3
   0   6  -3 412.358 81.5709   3
   0  -6   3 425.069 55.6202   1
   0  -6  -3 420.691 48.4418   1
   0  -6  -4 282.728 41.4571   1
   0  -6   4 261.518 52.2968   1
   0   6   4 278.998 59.8439   2
   0  -6  -4 182.570 65.3611   4
   0   6   4 319.386 76.6634   3
   0   6  -4 275.552 47.5868   2
   0   6  -4 308.814 74.2060   3
   0  -6   4 425.360 88.2133   4
   0   6  -5 2241.18 163.237   3
   0   6  -5 1696.49 85.3740   2
   0  -6   5 2015.70 115.232   1
   0  -6  -5 2125.54 89.4039   1
   0  -6  -5 2245.07 158.496   4
   0  -6   5 2082.46 163.458   4
   0   6   5 2221.26 158.941   3
   0   6   5 2226.35 129.102   2
   0  -6   6 328.375 59.0895   1
   0   6   6 447.746 87.2139   3
   0  -6   6 412.793 87.9023   4
   0  -6  -6 454.005 86.2698   4
   0   6  -6 481.009 85.2244   3
   0   6   6 343.046 62.4052   2
   0  -6  -7 124.755 61.5856   4
   0  -6   7 123.371 47.1451   1
   0  -6   7 104.049 62.6039   4
   0   6  -7 153.366 65.0774   3
   0   6   7 138.405 51.7750   2
   0   6   7 149.663 67.7519   3
   0  -6   8 280.732 73.6257   4
   0   6   8 247.924 55.1552   2
   0   6  -8 154.698 53.4876   3
   0   6   8 209.289 63.2719   3
   0  -6   8 219.859 55.3544   1
   0  -6  -8 225.663 73.2022   4
   0   6  -9 31.9233 50.2887   3
   0   6   9 118.879 64.1561   3
   0   6   9 140.133 49.9669   2
   0  -6  -9 99.8107 64.8671   4
   0  -6   9 48.0396 39.7658   1
   0  -6   9 71.9787 63.7978   4
   0  -6  10 833.373 87.2481   1
   0   6 -10 1015.22 116.126   3
   0   6  10 794.103 92.4963   2
   0   6  10 826.378 103.187   3
   0  -6 -10 934.686 107.361   4
   0  -6  10 1026.49 117.615   4
   0  -6 -11 52.2697 57.7531   4
   0   6 -11 31.1117 60.7776   3
   0  -6  11 6.11808 40.0497   1
   0  -6  11-27.0166 54.7261   4
   0   6  11-11.9312 43.6930   2
   0   6  11 57.8136 54.9837   3
   0   6 -12 206.549 69.6527   3
   0   6  12 159.762 58.0449   2
   0  -6 -12 161.939 64.4710   4
   0  -6  12 211.982 74.3203   4
   0   6  12 121.254 59.9685   3
   0  -6  12 111.951 44.7595   1
   0   6 -13 528.092 94.5979   3
   0  -6 -13 525.542 86.6289   4
   0   6  13 509.113 85.7671   3
   0  -6  13 430.157 73.5570   1
   0  -6  13 548.497 96.6873   4
   0   6  13 553.641 82.3794   2
   0  -6  14 71.5740 58.5261   4
   0   6  14 98.5478 55.9877   2
   0  -6  14 71.1744 51.1128   1
   0   6  14 116.186 69.2287   3
   0  -6 -14 144.491 64.0700   4
   0   6 -14 70.8217 64.0135   3
   0  -6 -15 840.831 107.201   4
   0   6  15 777.543 105.396   3
   0  -6  15 664.239 90.1247   1
   0   6 -15 678.916 102.672   3
   0  -6  15 791.078 117.673   4
   0   6  15 697.979 95.5160   2
   0   6  16 530.739 92.7703   3
   0   6  16 471.458 86.4412   2
   0  -6  16 501.501 79.8922   1
   0   6 -16 598.091 99.8695   3
   0  -6  16 395.787 86.0576   4
   0  -6 -16 370.275 78.0483   4
   0   6  17 131.526 62.9224   3
   0   6  17 176.697 69.4837   2
   0  -6  17 32.7136 46.4701   1
   0  -6  17 107.722 63.9125   4
   0  -6 -17 48.3361 51.2668   4
   0   6 -17 142.412 64.5015   3
   0   6  18 68.3525 54.9910   2
   0   6  18 89.1713 64.0381   3
   0  -6 -18 55.8724 60.6451   4
   0   6 -18 105.816 65.0972   3
   0  -6  18-8.44714 49.2468   1
   0  -6  18-28.6092 66.5996   4
   0  -6 -19 171.311 59.4305   4
   0  -6  19 93.7591 64.5517   1
   0   6 -19 166.650 69.0905   3
   0  -6  19 127.386 66.0352   4
   0   6  19 292.797 78.1509   3
   0   6  19 288.858 74.8902   2
   0  -6  20 165.647 79.3885   4
   0   6 -20 54.1494 59.5792   3
   0   6  20 49.2658 63.5523   2
   0  -6  20-50.5194 58.8966   1
   0  -6 -20 106.062 56.3923   4
   0   6  20 83.3450 59.7513   3
   0   6  21 280.726 81.2292   3
   0   6 -21 178.835 71.8305   3
   0   6  21 182.673 70.9739   2
   0  -6  21 232.780 87.6123   4
   0  -6  21 211.352 72.3087   1
   0  -6 -21 210.894 66.3757   4
   0   6 -22 359.558 88.6135   3
   0   6  22 378.476 84.1744   3
   0  -6 -22 331.831 79.7484   4
   0  -6  22 511.448 109.711   4
   0  -6  22 508.486 94.9640   1
   0   6  22 387.340 84.2257   2
   0  -6  23 510.624 106.194   4
   0   6  23 567.163 102.055   3
   0   6  23 442.766 94.7547   2
   0  -6 -23 520.930 94.3525   4
   0  -6  23 495.079 94.3823   1
   0   6 -23 420.495 91.7868   3
   0  -6  24 188.952 72.1899   1
   0  -6 -24 153.846 63.2753   4
   0   6  24 136.091 63.5284   2
   0   6  24 180.475 76.9804   3
   0  -6  24 29.3371 71.4015   4
   0   6 -24 108.006 73.7527   3
   0  -6  25 312.222 83.3261   1
   0   6  25 340.466 88.7267   3
   0   6  25 273.036 83.6058   2
   0  -6 -25 197.493 69.4930   4
   0   6 -25 376.774 91.6402   3
   0   6  26 139.499 74.1199   3
   0   6 -26 72.5729 62.3318   3
   0  -6  26 188.355 70.7454   1
   0   6  26 47.4712 59.3979   2
   0  -6 -26 200.334 77.4125   4
   0   6  27 184.720 79.6701   2
   0  -6 -27 96.7237 58.4763   4
   0   6 -27 223.544 79.8121   3
   0  -6  27 97.0231 67.4527   1
   0  -6 -28-14.3459 79.8035   3
   0  -6 -28 103.018 61.7280   4
   0   6  28 59.5823 67.7752   2
   0   6 -28 47.4611 55.5401   4
   0   6 -28-48.7500 63.8142   3
   0  -6  28 73.6405 68.5295   1
   0  -6 -29 52.0899 65.6498   4
   0  -6  29-80.5829 76.5516   1
   0  -6 -29-117.371 90.3914   3
   0   6 -29 146.132 69.3875   4
   0   6  29 101.834 69.9794   2
   0   6 -29-16.6118 59.5175   3
   0  -6 -30 93.2824 68.7250   4
   0  -6 -30 123.329 81.0747   3
   0   6 -30 152.610 65.4502   4
   0   6  30 111.618 78.3201   2
   0  -6  30 109.330 75.8418   1
   0   6 -30 94.5188 59.5075   3
   0  -6 -31 586.635 105.120   4
   0   6 -31 607.912 111.983   3
   0   6 -31 706.634 113.508   4
   0   6  31 582.708 116.152   2
   0  -6  31 539.629 110.353   1
   0  -6 -31 585.573 126.226   3
   0   6 -32 446.021 94.3068   3
   0   6 -32 298.283 82.9239   4
   0  -6 -32 382.135 93.7205   4
   0  -6 -32 412.487 118.853   3
   0  -6  32 468.323 105.257   1
   0   6  32 271.570 98.1259   2
   0  -6  33 21.3039 69.7774   1
   0  -6 -33 309.065 109.326   3
   0  -6 -33 79.4243 63.0731   4
   0   6  33 92.3619 70.2320   2
   0   6 -33 189.375 80.1790   3
   0   6 -33 19.9890 65.1751   4
   0   6 -34 355.098 89.6365   3
   0   6  34 357.959 105.609   2
   0  -6  34 403.115 102.815   1
   0   6 -34 366.814 85.6768   4
   0  -6 -34 350.469 114.001   3
   0  -6 -34 398.290 96.8412   4
   0  -6 -35 26.2576 67.5904   4
   0  -6 -35-47.8578 88.7865   3
   0   6  35-81.9446 85.2163   2
   0   6 -35-102.908 74.9370   4
   0   6 -35 133.448 82.8329   3
   0  -6  35 49.3678 80.6309   1
   0  -6  36 436.617 113.505   1
   0   6 -36 395.996 96.5448   4
   0  -6 -36 292.017 96.3561   4
   0  -6 -36 566.580 136.408   3
   0   6 -36 296.204 88.7636   3
   0   6  36 206.363 97.2656   2
   0  -6 -37 12.2852 83.2398   3
   0   6  37 16.9544 80.8543   2
   0  -6 -37 79.8294 71.3417   4
   0   6 -37 92.4445 75.1644   4
   0   6 -37-109.088 76.1519   3
   0  -6  37 41.1157 73.5429   1
   0   6 -38 81.9133 76.3026   3
   0  -6 -38 371.641 124.559   3
   0  -6 -38 94.2867 76.1067   4
   0   6  38 145.911 91.2265   2
   0   6 -38 172.408 85.2588   4
   0  -6  38 54.9552 77.1246   1
   0   6 -39 76.9304 75.3190   4
   0  -6 -39 145.451 102.350   3
   0  -6 -39 104.591 70.3166   4
   0   6  39 24.0613 77.0184   2
   0   6 -39 85.5282 71.6823   3
   0  -6  39 81.6651 76.0750   1
   0  -6 -40 0.84060 71.8306   4
   0   6  40 7.99736 81.3474   2
   0  -6 -40 65.8714 89.9625   3
   0  -6  40 32.9508 81.7178   1
   0   6 -40 35.8195 66.6795   3
   0   6 -40-19.6253 71.2312   4
   0   6  41 126.900 98.4110   2
   0   6 -41 127.848 85.3583   3
   0  -6 -41 238.324 97.6549   4
   0   6 -41 105.780 72.9318   4
   0  -6  41-75.0444 96.8390   1
   0  -6 -41 73.8067 87.1743   3
   0  -6 -42 57.0601 91.4944   3
   0  -6 -42 9.22955 73.1764   4
   0   6  42-8.72218 84.0149   2
   0   6 -42 97.5086 75.6685   4
   0  -6  42 166.441 99.5927   1
   0   6 -42 35.3491 66.6532   3
   0   6 -43-40.0799 70.8413   4
   0  -6 -43-150.732 106.332   3
   0  -6  43 243.761 117.033   1
   0   6  43-30.6108 92.4334   2
   0  -6 -43 6.95143 74.1238   4
   0   6 -43 31.0311 74.8510   3
   0   6 -44-67.3589 72.5309   4
   0  -6 -44-2.52320 71.7248   4
   0   6 -44 178.775 90.4819   3
   0  -6 -44-32.8756 95.8907   3
   0   6  44-65.4856 87.7948   2
   0  -6  44 115.663 97.5459   1
   0   6  45 54.2073 87.7391   2
   0  -6 -45 205.326 119.625   3
   0  -6  45 57.3552 84.4760   1
   0   6 -45 9.82465 68.2352   3
   0   6 -45 79.7404 69.6637   4
   0  -6 -45-1.02872 76.9826   4
   0  -6 -46 112.582 101.216   3
   0   6 -46 124.655 79.5530   4
   0   6 -46-37.6252 72.1118   3
   0  -6 -46-44.8830 84.5326   4
   0   6 -47-60.3363 76.4034   3
   0  -6 -47 180.079 106.834   3
   0  -6 -47 15.9887 85.9716   4
   0   6 -47 33.4041 75.3797   4
   0   6 -48 82.9971 82.1714   3
   0   6 -48 119.723 89.4948   4
   0  -7   0 16.5954 55.4895   4
   0   7   0 58.0478 57.9177   3
   0  -7   1 110.889 65.1956   4
   0   7   1-23.3626 56.1487   3
   0  -7  -1-18.2654 63.7232   4
   0   7  -1 39.0978 55.5789   3
   0  -7   2 79.3531 62.3346   4
   0   7  -2 8.01583 53.6119   3
   0  -7  -2 56.1650 61.6490   4
   0   7   2 117.007 71.8429   3
   0  -7  -3 115.713 67.7269   4
   0   7   3-29.7866 54.6987   3
   0   7   3-3.57093 39.0690   2
   0   7  -3 49.4184 52.9466   3
   0  -7   3-6.26193 59.1397   4
   0  -7   4 15.3739 34.9575   1
   0   7  -4-4.66820 52.1157   3
   0   7   4 9.67679 37.7409   2
   0  -7  -4-43.5539 62.6558   4
   0  -7   4 4.76765 65.3101   4
   0   7   4-30.2362 63.8336   3
   0  -7   5 35.9954 38.5242   1
   0   7  -5 117.600 66.0177   3
   0   7   5 105.264 67.7399   3
   0   7   5 38.8241 45.6269   2
   0  -7   5 13.1487 67.7370   4
   0  -7  -5 71.0188 68.0373   4
   0  -7   6 74.2325 57.8544   4
   0  -7   6 105.555 48.4921   1
   0   7   6 65.5892 56.1829   3
   0   7  -6 30.2313 56.7010   3
   0   7   6 17.2810 41.2357   2
   0  -7  -6 52.6389 57.1581   4
   0  -7   7 14.0562 38.8626   1
   0   7   7 41.0803 59.0639   3
   0  -7  -7 69.5214 67.1158   4
   0   7   7-3.17513 45.2456   2
   0  -7   7 6.37105 56.4401   4
   0   7  -7 47.6167 62.7929   3
   0   7   8-22.6096 47.8082   2
   0   7  -8 68.7006 66.2013   3
   0  -7  -8 92.3153 61.9388   4
   0   7   8 90.7509 61.2177   3
   0  -7   8-6.27113 40.2566   1
   0  -7   8 122.353 69.0677   4
   0   7  -9 29.3168 58.7358   3
   0  -7   9 94.7142 50.1343   1
   0  -7  -9-3.86654 58.2714   4
   0   7   9 86.3713 58.2775   3
   0  -7   9 35.8934 59.4751   4
   0   7   9-8.54002 45.6093   2
   0   7 -10 421.114 95.8149   3
   0   7  10 286.387 61.9719   2
   0  -7  10 504.104 101.994   4
   0   7  10 353.257 87.4700   3
   0  -7  10 270.698 62.7927   1
   0  -7 -10 527.856 97.4511   4
   0   7  11 26.8359 51.3405   2
   0   7  11-51.4169 62.0109   3
   0  -7  11 69.9923 64.3117   4
   0   7 -11 17.6959 63.4059   3
   0  -7  11 70.4419 44.6160   1
   0  -7 -11-13.5304 56.5028   4
   0  -7 -12-13.7049 59.0414   4
   0  -7  12 68.5537 50.6444   1
   0   7 -12 65.0361 59.5008   3
   0   7  12 49.9671 50.6277   2
   0   7  12 119.511 68.5920   3
   0  -7  12 20.2932 63.5699   4
   0  -7  13 107.859 59.2448   1
   0  -7 -13 183.814 75.0145   4
   0   7 -13 125.797 62.9518   3
   0   7  13 122.217 64.0174   3
   0   7  13 133.542 70.0140   2
   0  -7  13 198.401 76.7077   4
   0   7  14 54.9809 56.4815   2
   0   7  14 18.5066 63.2505   3
   0   7 -14-30.6957 59.3214   3
   0  -7  14 13.9782 47.3957   1
   0  -7 -14-6.78829 56.2936   4
   0  -7  14 20.5178 62.0682   4
   0   7  15 79.5212 59.8325   3
   0   7  15 134.604 60.4637   2
   0  -7 -15 205.292 81.8994   4
   0   7 -15 162.102 76.5725   3
   0  -7  15 65.6905 55.8988   1
   0  -7  15 89.8958 72.8108   4
   0  -7  16 146.802 78.1360   4
   0   7 -16 81.8620 62.6588   3
   0  -7  16 24.8746 48.7796   1
   0   7  16 47.2083 58.6785   2
   0   7  16 218.850 83.4748   3
   0  -7 -16 8.83418 56.8289   4
   0  -7 -17 150.123 67.5248   4
   0  -7  17 55.4816 64.0874   4
   0  -7  17 18.3419 49.2384   1
   0   7 -17 7.92346 60.9910   3
   0   7  17 18.8777 66.5834   3
   0   7  17 5.65337 53.1605   2
   0  -7 -18 31.3110 58.9657   4
   0  -7  18-10.2222 69.0001   4
   0   7  18 111.386 73.9611   3
   0   7 -18 104.776 70.2005   3
   0   7  18-90.5699 72.8507   2
   0  -7  18 30.8782 56.9488   1
   0  -7  19-72.0629 58.8855   1
   0   7  19 158.718 78.1572   3
   0   7 -19-42.9002 64.1055   3
   0  -7  19 83.3416 72.6867   4
   0   7  19 33.9437 60.7409   2
   0  -7 -19 149.004 76.9174   4
   0  -7  20-56.9627 82.0953   4
   0  -7  20-44.9982 56.0532   1
   0   7  20 58.9798 67.1308   3
   0   7  20-21.4662 65.6057   2
   0   7 -20-16.1685 62.8972   3
   0  -7 -20 0.61436 62.7619   4
   0   7  21 103.282 64.5866   2
   0  -7  21 136.159 65.2328   1
   0   7 -21 102.696 70.8192   3
   0   7  21 157.960 72.0079   3
   0  -7  21 80.7575 65.9715   4
   0  -7 -21 135.571 76.2316   4
   0  -7  22 56.9980 61.2624   1
   0  -7 -22 92.8574 69.2595   4
   0  -7  22-20.0660 74.8047   4
   0   7  22 123.734 68.6232   2
   0   7  22 45.3343 64.6629   3
   0   7 -22 153.942 74.0312   3
   0  -7  23 223.594 79.4051   4
   0  -7 -23 320.545 85.0632   4
   0  -7  23 259.045 77.9788   1
   0   7  23 190.410 77.7364   3
   0   7  23 287.245 92.3464   2
   0   7 -23 277.393 83.2613   3
   0  -7 -24 47.9622 66.7944   4
   0   7 -24-2.90500 60.2181   3
   0  -7  24-6.98086 64.6168   1
   0   7  24-30.2286 70.2756   2
   0  -7  24 22.4319 65.3301   4
   0   7  24 33.7261 69.1561   3
   0   7  25 58.2925 67.0715   3
   0   7  25 33.3355 66.4239   2
   0   7 -25 123.951 62.9695   3
   0  -7 -25 159.901 76.7530   4
   0  -7  25 50.7696 72.9266   4
   0  -7  25-90.5287 71.4942   1
   0  -7 -26 252.749 86.1978   4
   0  -7  26 106.155 88.1650   4
   0   7  26 119.805 75.5525   2
   0   7  26 156.141 79.7287   3
   0   7 -26 248.182 88.8196   3
   0  -7  26 105.703 68.5672   1
   0   7  27 93.6431 75.6426   3
   0  -7  27 336.584 114.696   4
   0  -7  27 264.133 92.9889   1
   0   7 -27 164.124 86.8825   3
   0  -7 -27-8.56293 60.1943   4
   0   7  27 67.5473 71.1574   2
   0   7  28 1544.15 166.832   2
   0  -7 -28 1678.85 163.154   4
   0  -7  28 1589.09 163.791   1
   0   7 -28 1583.26 168.835   3
   0  -7  28 1811.51 202.308   4
   0  -7  29-78.5030 74.0861   1
   0   7  29 59.3103 79.9648   2
   0  -7 -29 292.304 126.069   3
   0  -7  29-4.80801 80.7357   4
   0   7 -29 330.976 108.576   3
   0  -7 -29 244.913 91.9890   4
   0   7 -30 272.819 96.1886   3
   0  -7  30 178.562 87.7412   1
   0  -7 -30 456.327 125.116   3
   0  -7  30 162.988 97.9172   4
   0   7  30 210.705 94.0162   2
   0  -7 -30 171.261 72.9285   4
   0  -7  31 142.178 100.893   4
   0   7 -31 139.927 85.2115   3
   0  -7 -31 192.650 89.9521   4
   0  -7  31 215.059 87.8560   1
   0  -7 -31 47.3025 100.698   3
   0   7  31 180.688 80.9433   2
   0  -7 -32 171.198 86.9407   4
   0  -7  32 137.278 104.621   4
   0  -7 -32-34.9602 99.5859   3
   0   7  32 99.4347 84.3779   2
   0  -7  32 94.1132 76.6392   1
   0   7 -32 169.817 81.1194   3
   0  -7 -33 267.304 115.848   3
   0   7 -33 249.784 101.367   3
   0   7  33 189.082 95.3381   2
   0  -7 -33 216.459 80.8344   4
   0  -7  33 337.194 109.451   1
   0  -7  33 312.361 111.283   4
   0   7 -34 116.244 86.3797   3
   0  -7  34 166.885 106.328   4
   0  -7 -34-9.09288 67.6573   4
   0  -7  34 4.20312 76.4529   1
   0  -7 -34 51.2389 95.3941   3
   0   7  34 54.3544 80.0040   2
   0  -7  35 3.89614 73.2313   1
   0  -7  35 23.1480 86.2573   4
   0   7 -35 39.9502 70.8174   3
   0   7  35 21.0154 80.4788   2
   0  -7 -35 206.953 112.951   3
   0  -7 -35 84.1338 76.0855   4
   0  -7  36-38.1377 91.4357   4
   0   7  36 69.1160 87.5832   2
   0  -7 -36-55.8130 108.196   3
   0  -7 -36 14.7396 69.4661   4
   0  -7  36 204.715 92.1524   1
   0   7 -36 0.41504 71.3146   3
   0  -7 -37 26.5904 98.8721   3
   0  -7  37 5.21927 79.5036   1
   0  -7 -37-3.95342 75.7377   4
   0  -7  37 59.5770 96.5005   4
   0   7  37 130.624 88.3994   2
   0   7 -37 154.301 90.1741   3
   0   7 -38 192.670 94.7790   3
   0   7  38-22.2987 79.8820   2
   0  -7 -38 68.6283 112.145   3
   0  -7 -38 124.804 88.3891   4
   0  -7  38 45.4939 80.0041   1
   0  -7  38-45.5025 94.2276   4
   0  -7 -39 60.4478 77.7445   4
   0  -7  39 66.3646 89.0531   1
   0   7  39 0.12626 79.5678   2
   0  -7  39 0.27059 100.166   4
   0   7 -39 39.0146 77.4962   3
   0  -7 -39 204.131 121.602   3
   0  -7 -40 99.0678 90.1185   4
   0  -7  40-171.918 98.9997   4
   0  -7 -40 96.9840 105.421   3
   0  -7  40 119.530 95.4574   1
   0   7  40 14.3468 91.4996   2
   0   7 -40 41.1687 77.8414   3
   0  -7  41-30.1119 98.3141   4
   0  -7 -41-49.1549 74.6389   4
   0  -7  41 154.941 100.563   1
   0   7 -41 111.436 94.5483   3
   0   7  41 199.743 104.177   2
   0  -7 -41-92.6551 109.788   3
   0  -7  42 7.60404 100.276   4
   0  -7 -42 3.89346 83.1694   4
   0   7 -42 15.5048 77.0323   3
   0  -7 -42 139.505 119.909   3
   0   7 -43 138.017 86.0555   3
   0  -7 -43 133.854 90.1019   4
   0  -7 -44-43.0662 91.2846   4
   0   8   0 435.881 99.0033   3
   0  -8   0 450.831 101.483   4
   0  -8   1 264.000 92.0439   4
   0   8   1 85.7088 72.2461   3
   0  -8  -1 250.285 90.6665   4
   0   8  -1 219.354 83.9607   3
   0  -8  -2 341.864 91.4575   4
   0  -8   2 206.416 88.0773   4
   0   8   2 569.580 116.716   3
   0   8  -2 393.546 96.6556   3
   0  -8   3 168.865 85.1498   4
   0   8   3 190.008 83.7012   3
   0   8  -3 55.2466 67.7558   3
   0  -8  -3 135.086 78.9536   4
   0   8  -4 240.129 79.8853   3
   0  -8  -4 350.421 99.1793   4
   0   8   4 265.122 90.0014   3
   0  -8   4 132.250 80.2477   4
   0  -8  -5 95.4098 71.4096   4
   0   8  -5 133.949 65.6227   3
   0  -8   5 131.532 83.2484   4
   0   8   5 166.565 80.9741   3
   0   8  -6 361.891 96.2724   3
   0  -8  -6 453.044 105.482   4
   0  -8   6 383.392 99.4063   4
   0   8   6 340.976 99.2396   3
   0  -8   7 72.8468 69.0669   4
   0   8  -7 86.0731 76.5798   3
   0  -8  -7 164.191 76.5406   4
   0   8   7 131.592 77.7296   3
   0  -8  -8 105.296 72.4692   4
   0  -8   8 260.245 91.7911   4
   0   8   8 230.013 83.3194   3
   0   8  -8 74.1163 68.2892   3
   0   8   9 139.412 82.9169   3
   0  -8   9 278.385 87.8917   4
   0  -8  -9 260.205 81.5748   4
   0   8  -9 228.822 79.4893   3
   0  -8 -10 486.957 101.941   4
   0   8 -10 288.137 94.5718   3
   0   8  10 522.473 108.105   3
   0  -8  10 417.734 103.124   4
   0  -8  11 140.823 85.5771   4
   0   8  11 249.203 86.2723   3
   0  -8 -11 94.9557 76.7464   4
   0   8 -11 38.0728 74.2695   3
   0   8  12 340.989 100.819   3
   0  -8 -12 260.409 83.8135   4
   0  -8  12 178.194 75.9455   4
   0   8 -12 216.923 83.5298   3
   0  -8  13 112.838 73.8832   4
   0   8  13-17.7668 55.2641   2
   0  -8 -13 12.5989 69.9535   4
   0   8  13 45.5142 72.9002   3
   0   8 -13 210.948 96.6822   3
   0  -8  14-49.4543 54.0079   1
   0   8  14 35.2531 71.3299   3
   0   8 -14 131.143 79.3636   3
   0  -8  14 113.646 88.3199   4
   0  -8 -14 120.309 78.8004   4
   0   8  14 12.7269 52.5254   2
   0   8  15 189.338 68.7708   2
   0   8  15 164.909 76.4263   3
   0  -8  15 149.007 64.4210   1
   0   8 -15 336.189 97.7878   3
   0  -8 -15 213.321 83.6430   4
   0  -8 -16 217.580 82.4406   4
   0  -8  16 222.381 73.4916   1
   0   8 -16 91.5969 78.6993   3
   0   8  16 47.0402 58.1722   2
   0  -8  16 357.972 103.654   4
   0   8  16 133.589 71.0975   3
   0  -8  17 366.180 106.589   4
   0  -8 -17 396.639 104.438   4
   0  -8  17 192.149 71.0590   1
   0   8  17 277.397 89.8401   3
   0   8  17 134.558 71.9039   2
   0   8 -17 252.958 88.8471   3
   0  -8  18 33.5795 72.0256   4
   0  -8 -18 79.2406 72.4611   4
   0   8 -18 44.0131 67.9432   3
   0  -8  18-45.2836 63.6495   1
   0   8  18 104.237 70.8788   2
   0   8  18-2.60674 68.4824   3
   0  -8 -19-20.2337 69.7332   4
   0   8  19 36.8904 60.4827   2
   0   8 -19 40.2973 70.2891   3
   0  -8  19 5.79654 61.9292   1
   0  -8  19 40.6899 83.0273   4
   0   8  19 88.0201 70.1622   3
   0   8 -20 332.310 96.1830   3
   0  -8 -20 353.521 99.3744   4
   0   8  20 331.810 90.4535   2
   0  -8  20 373.425 116.273   4
   0  -8  20 212.235 78.4579   1
   0   8  20 343.701 101.840   3
   0  -8 -21 512.994 112.653   4
   0  -8  21 472.343 122.035   4
   0   8  21 361.317 89.9118   2
   0  -8  21 335.076 91.1849   1
   0   8  21 308.675 96.2143   3
   0   8 -21 424.988 107.149   3
   0  -8  22 280.025 102.473   4
   0   8 -22 76.1355 74.7351   3
   0   8  22 210.352 80.8067   3
   0  -8  22-18.8391 63.9384   1
   0  -8 -22 112.552 80.8618   4
   0   8  22 162.591 86.5065   2
   0  -8  23 151.626 97.0843   4
   0   8  23 186.616 81.6397   2
   0  -8 -23 383.095 100.121   4
   0   8  23 252.157 98.3719   3
   0  -8  23 159.559 78.6812   1
   0   8 -23 224.987 93.0343   3
   0   8  24 177.695 77.2994   2
   0  -8 -24 223.254 89.3845   4
   0   8  24 382.703 104.553   3
   0   8 -24 504.734 119.618   3
   0  -8  24 231.050 104.260   4
   0  -8  24 278.481 86.0034   1
   0   8  25 324.676 101.327   2
   0  -8  25 202.774 94.8258   4
   0  -8 -25 172.507 83.5794   4
   0  -8  25 191.971 83.6842   1
   0   8  25 127.337 83.7354   3
   0   8 -25 400.288 112.473   3
   0   8 -26 144.944 92.7360   3
   0   8  26 177.709 90.9300   3
   0  -8  26-87.8843 75.9207   1
   0  -8  26 57.8893 81.9016   4
   0  -8 -26-21.8078 68.8854   4
   0   8  26-50.8451 74.4528   2
   0  -8  27-25.9548 69.8405   1
   0  -8  27-15.5422 83.7901   4
   0  -8 -27-63.8631 79.3146   4
   0   8  27 99.4669 82.8471   3
   0   8  27 44.2963 81.0826   2
   0   8 -27 142.277 81.1034   3
   0   8  28 183.188 94.6923   3
   0  -8 -28 28.0261 69.7045   4
   0   8 -28 226.500 96.6682   3
   0  -8  28 16.0174 84.4802   4
   0   8  28 32.9580 78.6163   2
   0  -8  28-41.2566 78.3638   1
   0   8 -29 156.405 85.0593   3
   0  -8  29-39.5946 91.9349   4
   0  -8 -29 65.3815 69.5636   4
   0  -8  29-138.310 81.6849   1
   0   8  29 56.3235 73.7150   2
   0  -8  30 93.6444 87.7857   4
   0  -8 -30 214.575 93.4967   4
   0   8  30 123.966 84.6062   2
   0   8 -30 146.441 80.0705   3
   0  -8 -30 467.005 138.129   3
   0  -8  30 156.384 83.2777   1
   0   8  31 21.4440 81.6099   2
   0  -8 -31 43.5562 80.2266   4
   0  -8 -31 63.7672 95.3866   3
   0   8 -31-113.079 82.0963   3
   0  -8  31 77.8519 83.4914   1
   0  -8  31 197.783 101.528   4
   0   8 -32 288.635 99.7286   3
   0   8  32 69.2369 88.3704   2
   0  -8  32 294.766 107.280   1
   0  -8 -32 378.942 109.357   4
   0  -8  32 355.455 118.284   4
   0  -8 -32 358.099 130.686   3
   0   8 -33 299.768 98.9667   3
   0  -8  33 299.746 100.014   1
   0  -8 -33 207.491 93.8286   4
   0  -8 -33 210.903 117.470   3
   0   8  33 246.088 104.379   2
   0  -8  33 239.221 101.011   4
   0   8  34-25.8573 83.6841   2
   0  -8  34 178.395 105.995   4
   0  -8  34 50.2141 85.4883   1
   0   8 -34 64.0104 79.7090   3
   0  -8 -34 62.7878 97.6676   3
   0  -8 -34 178.441 96.4668   4
   0   8  35 119.411 92.2375   2
   0   8 -35 12.8736 70.0682   3
   0  -8 -35 298.696 104.083   4
   0  -8 -35 138.495 114.616   3
   0  -8  35 205.510 109.981   1
   0  -8  35-106.495 101.717   4
   0  -8  36-21.4697 82.6417   1
   0  -8 -36 2.97960 79.0447   4
   0   8 -36-47.3979 84.0704   3
   0  -8 -37-28.7632 81.5676   4
   0  -8 -38 20.3065 86.2137   4
   0   9   0 73.7080 79.2690   3
   0  -9   0 62.0942 85.4884   4
   0  -9   1 31.6105 84.5734   4
   0  -9  -1 176.099 95.1548   4
   0   9   1-24.6488 68.9483   3
   0   9  -1 87.5022 88.5747   3
   0   9  -2 167.917 73.6905   3
   0  -9   2 160.702 90.7868   4
   0   9   2 80.2602 67.6356   3
   0  -9  -2 104.308 87.1340   4
   0   9  -3 66.8596 75.4814   3
   0  -9   3 67.4939 85.8300   4
   0  -9  -3 130.813 90.1207   4
   0   9   3-1.67590 73.2269   3
   0  -9  -4 16.3287 71.0064   4
   0  -9   4 190.598 98.3162   4
   0   9  -4 62.5232 79.9279   3
   0   9   4 41.9634 80.0411   3
   0   9  -5 107.508 90.4605   3
   0  -9   5 66.8451 80.9513   4
   0   9   5-60.2087 68.6204   3
   0  -9  -5-46.2380 74.6679   4
   0   9   6-84.4451 82.0498   3
   0  -9   6 92.2102 89.0878   4
   0   9  -6-35.5182 74.7278   3
   0  -9  -6 68.8532 71.2267   4
   0   9  -7 14.1052 74.4876   3
   0  -9  -7 15.8042 73.2733   4
   0  -9   7 92.7320 77.5977   4
   0   9   7 56.4956 75.2763   3
   0  -9  -8 9.60168 71.1928   4
   0   9  -8 37.9561 78.1478   3
   0   9   8-66.3606 81.4772   3
   0  -9   8 171.384 95.9451   4
   0   9  -9 295.960 100.148   3
   0   9   9 371.234 108.428   3
   0  -9  -9 144.048 82.0411   4
   0  -9   9 203.413 94.5860   4
   0  -9  10 123.609 79.7401   4
   0  -9 -10 78.7514 84.3778   4
   0   9 -10 20.9766 76.4039   3
   0   9  10 134.127 86.3302   3
   0   9  11-6.93850 69.7819   3
   0  -9 -11-147.657 89.6521   4
   0  -9  11 50.7654 86.0538   4
   0   9 -11-66.2131 69.2888   3
   0   9  12 15.1341 74.0364   3
   0  -9  12 13.8836 78.5521   4
   0   9 -12 135.731 80.5816   3
   0  -9 -12 15.3401 75.9773   4
   0   9  13 46.3957 80.5564   3
   0  -9 -13 50.4495 74.2900   4
   0  -9  13-8.27090 78.3678   4
   0   9 -13 88.8873 75.4110   3
   0  -9 -14 222.852 101.549   4
   0  -9  14 95.6771 86.6223   4
   0   9 -14 232.265 96.0351   3
   0   9  14 122.331 87.7046   3
   0  -9  15 102.427 96.4840   4
   0   9 -15 86.8561 79.0657   3
   0  -9 -15-25.9664 79.7943   4
   0   9  15-22.0539 74.0878   3
   0  -9  16 16.7830 73.2235   4
   0   9 -16 26.4658 74.2227   3
   0  -9 -16 56.4573 76.0787   4
   0   9  16 163.542 84.9092   3
   0  -9 -17 52.5186 80.4075   4
   0  -9  17-109.045 94.7474   4
   0   9 -17 32.9529 77.3300   3
   0   9  18 85.5026 74.7277   3
   0   9 -18-3.12220 74.4088   3
   0  -9 -18 35.9457 78.5688   4
   0  -9  18 66.9177 86.1267   4
   0  -9  19 60.5834 89.7556   4
   0   9  19 102.636 84.6309   3
   0   9 -19-40.9035 77.8124   3
   0  -9 -19 74.1715 72.8866   4
   0   9  20 51.4721 87.3450   3
   0  -9 -20 2.23272 79.3745   4
   0  -9  20 80.7107 89.0918   4
   0   9 -20 147.380 87.6249   3
   0   9  21 175.428 96.1473   3
   0  -9 -21-145.252 94.7108   4
   0  -9  21 101.098 106.855   4
   0   9 -21 103.203 90.7636   3
   0   9  22 86.9650 94.4490   3
   0   9 -22-61.4115 84.8334   3
   0  -9  22-3.87829 79.2904   4
   0  -9 -22 181.126 96.5116   4
   0  -9  23 353.019 127.376   4
   0   9 -23 186.127 90.8447   3
   0   9  23 410.277 126.680   3
   0  -9 -23 380.669 114.151   4
   0   9  24-72.3531 96.9241   3
   0   9 -24 157.756 97.7624   3
   0  -9 -24-43.9212 86.4843   4
   0  -9  24 102.098 100.467   4
   0  -9 -25 77.7131 75.9436   4
   0   9  25 22.3588 82.4132   3
   0  -9  25 175.869 108.308   4
   0   9 -25 33.9655 78.0026   3
   0  -9 -26 79.3006 87.7960   4
   0   9 -26 31.6158 79.5682   3
   0  -9 -27 268.890 102.834   4
   0  -9 -28 277.409 105.436   4
   0   9  28 49.7883 86.4946   2
   0  -9  29 816.121 148.038   1
   0   9  29 749.258 145.191   2
   0   9  30 195.160 107.246   2
   0  -9  30-232.762 101.927   1
   0 -10   0-73.4819 95.0650   4
   0  10   0 50.9773 76.0377   3
   0  10  -1 55.9598 85.9455   3
   0 -10   1-85.5940 99.2160   4
   0 -10  -2 34.7863 86.6665   4
   0 -10  -3-124.627 96.7152   4
   0 -10  -4 39.2623 83.6880   4
  -1   0  58-114.258 96.6085   2
   1   0 -57 0.35109 81.1667   3
  -1   0  57-0.47443 86.7384   2
   1   0 -56 2006.25 210.012   3
  -1   0  56 1848.10 203.831   2
  -1   0  55-76.5399 79.3846   1
   1   0 -55 70.5539 78.9668   3
  -1   0  55 76.3380 80.9224   2
  -1   0  54 273.719 110.636   2
  -1   0  54 206.923 98.3406   1
   1   0 -54 7.09217 82.5999   3
   1   0 -53 52.6483 83.5412   3
  -1   0  53-35.4418 81.8138   2
  -1   0  53-90.1182 88.3365   1
  -1   0  52 297.433 99.5966   2
   1   0 -52 248.188 99.6923   3
  -1   0  52 261.566 95.2608   1
  -1   0  51-23.1073 73.5151   1
   1   0 -51-30.9793 78.3462   3
  -1   0  51-36.9724 80.2166   2
  -1   0  50 114.846 79.5869   1
   1   0 -50 319.258 97.8306   3
  -1   0  50 141.482 89.1810   2
  -1   0  49 75.9585 76.1897   1
   1   0 -49-62.5405 72.6995   3
  -1   0  49-55.2047 72.0750   2
  -1   0  48 112.939 79.7870   2
   1   0 -48 120.309 81.7343   3
  -1   0  48 75.4213 71.2719   1
   1   0 -47-43.8620 68.5782   3
  -1   0  47 33.6696 74.8172   2
  -1   0  47-42.9043 65.2704   1
   1   0 -46 165.895 84.3061   3
   1   0 -46 58.6996 50.5020   4
  -1   0  46 46.5495 64.2656   1
  -1   0  46-57.0088 63.2079   2
  -1   0  45 48.3479 63.7024   1
  -1   0  45-48.9471 71.9385   2
   1   0 -45 14.7202 50.6885   4
   1   0 -45 89.6138 71.7493   3
   1   0 -44 79.1021 76.2969   3
  -1   0  44 66.3457 66.5994   1
   1   0 -44 26.8883 50.8383   4
  -1   0  44 62.6460 70.5689   2
  -1   0  43 10.0820 57.8000   1
   1   0 -43 17.4633 44.0177   4
   1   0 -43 118.394 70.7188   3
  -1   0  43 121.649 66.8757   2
   1   0 -42 162.470 57.5240   4
   1   0 -42 112.613 71.1477   3
  -1   0  42 71.0518 60.7143   2
  -1   0  42 194.420 73.1668   1
   1   0 -41 87.2030 51.8637   4
  -1   0  41 43.9158 62.7199   2
  -1   0  41 7.87401 50.5947   1
   1   0 -41-7.52336 56.9209   3
   1   0 -40 385.099 90.8207   3
  -1   0  40 421.100 88.4275   1
   1   0 -40 352.327 68.3239   4
  -1   0  40 416.625 91.2107   2
   1   0 -39-6.24789 57.7601   3
  -1   0  39 18.0256 55.8726   1
   1   0 -39 73.7675 50.5152   4
  -1   0  39-12.8811 64.0345   2
  -1   0  38 2567.57 178.200   2
  -1   0  38 2140.05 158.826   1
   1   0 -38 2342.77 141.212   4
   1   0 -38 2262.73 175.214   3
   1   0 -37 3.53454 40.3787   4
   1   0 -37-5.68641 54.6809   3
  -1   0  37 139.336 64.8130   2
  -1   0  37 38.8695 50.3470   1
   1   0 -36 5446.83 202.900   4
  -1   0  36 5551.38 238.567   1
  -1   0  36 5959.37 255.746   2
   1   0 -36 5434.98 256.927   3
   1   0 -35 4.43298 38.7087   4
   1   0 -35 31.5493 56.7218   3
  -1   0  35 45.5760 48.2541   1
  -1   0  35 73.2818 57.2774   2
  -1   0  34 2559.27 166.742   2
  -1   0  34 2175.05 147.054   1
   1   0 -34 2506.73 172.911   3
   1   0 -34 2333.67 129.035   4
   1   0 -33-23.3730 35.5397   4
   1   0 -33 2.48821 52.4296   3
  -1   0  33-118.994 51.5149   1
  -1   0  33 44.8725 52.6591   2
  -1   0  32 1021.64 105.980   2
  -1   0  32 974.650 98.8977   1
   1   0 -32 963.776 83.9995   4
   1   0 -32 937.105 104.481   3
  -1   0  31-27.1958 44.7611   2
  -1   0  31 51.2442 45.1727   1
   1   0 -31 6.14909 47.0446   3
   1   0 -31 67.7301 43.3135   4
   1   0 -30 6143.08 245.131   3
   1   0 -30 6273.06 192.247   4
  -1   0  30 6159.04 223.648   1
  -1   0  30 6473.22 236.109   2
  -1   0  29-21.5431 44.4030   2
   1   0 -29-13.0569 32.3044   4
   1   0 -29 27.9560 50.2481   3
  -1   0  29 34.3172 43.4386   1
  -1   0  28 1007.20 91.6677   1
  -1   0  28 902.489 93.8747   2
   1   0 -28 927.564 74.8330   4
   1   0 -28 1046.18 104.519   3
  -1   0  27 37.6397 42.1622   1
   1   0 -27 52.0425 36.8041   4
   1   0 -27-3.72030 45.0819   3
  -1   0  27 51.3256 40.0019   2
   1   0 -26 144.659 39.2216   4
   1   0 -26 175.595 57.4941   3
  -1   0  26 253.563 53.6820   1
  -1   0  26 120.300 45.1048   2
  -1   0  25 54.0139 42.1603   1
   1   0 -25 45.1963 31.8428   4
  -1   0  25 93.1642 45.2271   2
   1   0 -25-41.1930 43.7562   3
   1   0 -24 929.337 94.5147   3
  -1   0  24 785.317 80.4533   2
  -1   0  24 698.958 74.2371   1
   1   0 -24 808.436 65.5352   4
   1   0 -23 1.69546 25.7355   4
   1   0 -23 52.5436 47.0031   3
  -1   0  23-21.8530 34.5046   2
  -1   0  23-1.05953 34.3574   1
  -1   0  22 172.475 48.0908   2
  -1   0  22 154.140 44.4856   1
   1   0 -22 201.900 59.7550   3
   1   0 -22 210.669 38.9054   4
   1   0 -21 30.6058 42.8537   3
   1   0 -21 36.5160 29.3398   4
  -1   0  21-14.1157 38.7346   2
  -1   0  21 14.6153 32.8297   1
  -1   0  20 316.839 52.3797   1
   1   0 -20 374.509 65.2565   3
  -1   0  20 372.478 59.4244   2
   1   0 -20 340.874 42.2413   4
   1   0 -19-8.37540 25.2032   4
  -1   0  19-5.76244 33.9858   1
   1   0 -19 27.3888 41.2281   3
  -1   0  19 21.4641 39.1237   2
   1   0 -18 4878.63 176.459   3
  -1   0  18 4729.83 160.196   2
   1   0 -18 5044.87 124.702   4
  -1   0  18 4762.10 153.110   1
   1   0 -17-32.1785 42.9945   3
   1   0 -17 40.7404 27.2030   4
  -1   0  17-37.5218 36.0928   1
  -1   0  17 37.0663 39.6707   2
   1   0 -16 345.084 36.0590   4
  -1   0  16 327.221 49.8484   2
  -1   0  16 313.296 47.6733   1
   1   0 -16 492.996 63.8183   3
   1   0 -15-21.1458 20.9608   4
   1   0 -15 5.40331 37.3233   3
  -1   0  15-26.4997 30.8624   1
  -1   0  15 19.1646 32.4057   2
   1   0 -14 108.802 23.6911   4
  -1   0  14 123.778 33.2584   1
   1   0 -14 179.642 47.9822   3
  -1   0  14 136.715 29.0218   4
  -1   0  14 182.582 43.4119   2
  -1   0  13-18.1515 22.1746   4
  -1   0  13-10.9977 31.1212   2
   1   0 -13 12.9592 19.1377   4
   1   0 -13 62.8661 41.4130   3
  -1   0  13 11.9022 30.3623   1
  -1   0  12 145.424 42.0721   2
   1   0 -12 120.443 40.3509   3
  -1   0  12 62.1546 21.0438   4
   1   0 -12 119.507 22.9669   4
  -1   0  12 126.618 33.4477   1
  -1   0  11-9.16295 18.6150   4
   1   0 -11 41.3259 39.5821   3
  -1   0  11 11.2827 27.4955   1
  -1   0  11 37.7593 34.9225   2
   1   0 -11-12.5427 18.0076   4
  -1   0  10 297.430 45.1545   2
  -1   0  10 321.134 38.2456   1
   1   0 -10 298.714 49.2637   3
  -1   0  10 327.960 26.7083   4
   1   0 -10 339.647 24.0653   4
   1   0  -9 5.78947 14.9638   4
   1   0  -9-6.76328 33.8970   3
  -1   0   9-3.18028 14.7322   4
  -1   0   9 25.7715 31.1369   2
  -1   0   9 16.6622 27.2386   1
  -1   0   8 539.789 44.1431   1
  -1   0   8 469.279 47.5115   2
   1   0  -8 426.263 46.2598   3
   1   0  -7-13.8221 31.0217   3
  -1   0   7 0.54308 24.1160   1
  -1   0   7-15.4996 29.6445   2
  -1   0   6 181.425 34.6429   2
   1   0  -6 131.673 28.2671   1
  -1   0   6 238.653 32.5874   1
   1   0  -6 194.663 35.4598   3
   1   0  -5-17.1567 22.8361   3
   1   0  -5-12.5842 23.0445   1
  -1   0   5-14.5036 24.9789   2
  -1   0   5-15.0204 26.0312   3
  -1   0   5 5.73654 21.9844   1
  -1   0   4 27.2431 25.5307   3
  -1   0   4 24.5121 23.7573   2
   1   0  -4 24.3392 21.7564   1
  -1   0   4 47.7669 22.3875   1
   1   0  -4 25.1506 24.8926   2
   1   0  -4 17.9510 21.3631   3
   1   0  -3-13.7632 23.9418   2
  -1   0   3-0.76610 21.2969   2
  -1   0   3-30.0591 22.7373   1
  -1   0   3-12.8018 23.6500   3
   1   0  -3 16.2906 21.8206   1
   1   0  -3 47.0010 20.6742   3
   1   0  -2 82.2082 20.7498   1
  -1   0   2 127.883 25.5509   1
  -1   0   2 68.9262 21.9876   3
   1   0  -2 54.7065 17.7379   3
  -1   0   2 138.000 26.2178   2
   1   0  -2 94.0839 26.3375   2
   1   0  -1 35.1060 21.0276   2
   1   0  -1 3.30661 10.6125   4
  -1   0   1-16.3145 18.8729   3
   1   0  -1 22.5864 14.2437   3
  -1   0   1-2.44439 18.1427   1
   1   0  -1 18.1638 22.1389   1
   1   0  -1 22.5017 22.3892   2
  -1   0   1 7.61564 12.7945   4
  -1   0   0 67.9050 20.1983   1
  -1   0   0 77.8882 16.3244   3
   1   0   0 69.3473 26.6613   1
  -1   0   0 57.8989 15.4858   4
  -1   0   0 60.3260 23.3685   2
   1   0   0-2.23525 18.3955   2
   1   0   0 56.4909 14.6531   3
   1   0   0 68.1642 14.9004   4
  -1   0  -1-3.73685 17.0211   4
   1   0   1-0.88760 16.1074   4
  -1   0  -1-7.34112 22.6584   2
  -1   0  -1 16.1941 18.8936   1
   1   0   1 21.5326 22.0917   1
   1   0   1-20.2533 20.1252   2
   1   0   2 13.7387 20.3148   1
   1   0   2 18.2563 22.6422   2
   1   0   2 86.0919 19.8995   4
  -1   0  -2 81.3569 23.4470   4
  -1   0  -2 92.1031 25.9310   2
  -1   0  -2 72.3415 23.3378   1
  -1   0  -3 29.3389 28.3809   2
   1   0   3 13.6258 21.4934   4
  -1   0  -3 11.9196 20.5656   4
  -1   0  -3 22.1705 20.1908   1
   1   0   3 15.0310 23.2564   2
   1   0   3 25.5624 21.5167   1
  -1   0  -4 200.158 35.5389   2
   1   0   4 215.806 32.2054   2
   1   0   4 175.620 27.4189   4
   1   0   4 97.1840 25.2132   1
  -1   0  -4 154.147 29.6785   1
  -1   0  -4 187.721 29.5916   4
   1   0   5-17.6749 25.8227   4
  -1   0  -5 14.7135 23.3674   1
  -1   0  -5-6.56020 25.9746   4
   1   0   5 15.9813 26.9250   2
  -1   0  -5 26.7271 29.8285   2
  -1   0  -6 40.0962 26.4222   1
  -1   0  -6 78.2697 31.5463   2
   1   0   6 25.1438 26.0021   2
  -1   0  -6 53.4653 27.6600   4
   1   0   7-3.43494 26.7407   2
   1   0   7-9.01938 15.8043   3
  -1   0  -7-0.21674 14.8094   3
  -1   0  -7 21.0168 29.5881   1
  -1   0  -7 24.7990 27.3679   4
  -1   0  -8 223.861 35.2032   1
  -1   0  -8 268.941 23.9507   3
  -1   0  -8 186.428 36.9755   4
   1   0   8 179.814 23.8537   3
   1   0   8 288.665 37.6965   2
   1   0   9 7.13582 27.0261   2
  -1   0  -9 8.64427 18.9944   3
   1   0   9 44.4004 24.0442   3
  -1   0  -9 24.3450 32.6284   4
   1   0   9 35.4436 30.1560   1
   1   0  10 240.776 40.3407   2
   1   0  10 231.895 31.5720   3
  -1   0 -10 196.053 28.6172   3
   1   0  10 270.206 41.9440   1
  -1   0 -10 202.523 39.5653   4
  -1   0 -11 24.8229 33.8616   4
   1   0  11-8.47485 29.3480   2
   1   0  11 5.49257 31.5435   1
  -1   0 -11 9.45141 22.3804   3
   1   0  11 16.4276 23.5767   3
  -1   0 -12 215.172 46.4887   4
   1   0  12 195.406 33.7927   3
  -1   0 -12 209.956 30.3566   3
   1   0  12 231.173 37.4781   2
   1   0  12 266.565 45.4028   1
   1   0  13 33.7375 32.8330   2
   1   0  13-9.24984 33.4253   1
  -1   0 -13-10.7414 24.3885   3
  -1   0 -13 17.1158 35.2829   4
  -1   0 -14 248.149 39.0843   3
   1   0  14 235.966 42.0103   1
  -1   0 -14 282.370 51.8150   4
   1   0  14 276.159 44.2648   2
  -1   0 -15 19.2928 28.0129   3
  -1   0 -15-12.0569 35.2251   4
   1   0  15-16.5754 32.9759   1
   1   0  15-0.52041 31.6446   2
   1   0  16 475.194 56.9713   1
  -1   0 -16 510.545 50.8062   3
   1   0  16 551.053 57.1637   2
  -1   0 -16 580.997 63.1701   4
   1   0  17 39.9683 38.5658   1
  -1   0 -17 17.6272 38.2345   4
  -1   0 -17-29.9836 28.1170   3
   1   0  17 10.4309 33.2788   2
  -1   0 -18 1825.44 93.2613   3
   1   0  18 1942.35 103.277   2
   1   0  18 1689.93 102.944   1
  -1   0 -18 1891.07 108.801   4
   1   0  19 21.5955 37.3274   1
  -1   0 -19-2.91226 30.2265   3
  -1   0 -19-52.4215 41.3272   4
   1   0  19-5.63329 34.7979   2
  -1   0 -20 371.919 52.3334   3
   1   0  20 344.109 58.2505   1
  -1   0 -20 448.357 63.4372   4
   1   0  20 466.820 60.9484   2
   1   0  21 17.1126 37.1743   2
   1   0  21 5.40602 38.4373   1
  -1   0 -21 2.43256 33.0383   3
  -1   0 -21 13.5336 39.2990   4
  -1   0 -22 455.524 57.3600   3
   1   0  22 505.457 68.6723   1
   1   0  22 555.785 67.3108   2
  -1   0 -22 572.089 71.3996   4
   1   0  23-24.8121 38.7916   1
   1   0  23-1.22585 35.9540   2
  -1   0 -23-32.1896 35.3241   3
  -1   0 -23 38.1400 39.4297   4
   1   0  24 2884.30 146.821   1
  -1   0 -24 3060.68 151.217   4
  -1   0 -24 2822.76 131.771   3
   1   0  24 3238.88 149.720   2
  -1   0 -25 4.35895 37.7249   4
  -1   0 -25 23.4217 39.7253   3
   1   0  25-11.6485 39.8336   2
   1   0  25-37.2093 44.2649   1
   1   0  26 1015.28 90.3190   2
  -1   0 -26 1209.71 95.1007   3
  -1   0 -26 1109.57 97.1730   4
   1   0  26 1017.97 95.4378   1
  -1   0 -27 22.7443 36.6213   3
  -1   0 -27 41.3615 44.3583   4
   1   0  27 42.3323 42.5098   2
   1   0  27-0.13669 40.2717   1
  -1   0 -28 110.008 43.2084   3
   1   0  28 115.865 47.7632   1
   1   0  28 146.557 53.5972   2
  -1   0 -28 44.8433 43.1236   4
  -1   0 -29-45.9090 43.0540   3
  -1   0 -29 80.9330 51.2098   4
   1   0  29 16.9495 43.8909   1
   1   0  29-12.3332 43.5205   2
  -1   0 -30 506.443 71.9039   3
   1   0  30 629.781 88.3970   1
  -1   0 -30 569.846 81.5220   4
   1   0  30 584.966 83.1250   2
  -1   0 -31 20.9223 43.9471   4
   1   0  31 1.92370 46.3539   2
   1   0  31-61.6187 54.6352   1
  -1   0 -31 78.0495 48.8349   3
   1   0  32 2423.65 154.530   2
  -1   0 -32 2075.55 134.675   3
   1   0  32 2226.87 152.769   1
  -1   0 -32 2231.64 149.561   4
   1   0  33 19.1771 51.5298   1
   1   0  33-64.1944 50.2487   2
  -1   0 -33 10.2184 49.1612   4
  -1   0 -33 21.2742 40.5058   3
   1   0  34 5813.20 240.459   2
  -1   0 -34 4995.68 214.510   3
   1   0  34 5235.39 247.783   1
  -1   0 -34 5540.48 234.711   4
  -1   0 -35 68.4897 46.5949   3
   1   0  35 76.1807 58.2519   2
  -1   0 -35 51.9634 48.1080   4
   1   0  35-86.3237 64.9018   1
   1   0  36 737.461 100.912   2
  -1   0 -36 606.681 86.8594   3
   1   0  36 660.501 104.733   1
  -1   0 -36 910.141 107.664   4
   1   0  37 13.2181 55.7047   1
  -1   0 -37 9.51225 45.5217   4
  -1   0 -37 75.0773 53.7267   3
   1   0  37 77.1632 57.0634   2
  -1   0 -38 655.677 96.4057   3
  -1   0 -38 660.189 99.1698   4
   1   0  38 682.053 99.9332   2
   1   0  38 510.011 96.3597   1
   1   0  39 93.1871 60.2621   2
  -1   0 -39 97.6395 66.7000   4
   1   0  39-48.6842 60.1962   1
  -1   0 -39 35.0963 52.1945   3
  -1   0 -40 165.296 67.1526   4
   1   0  40 82.6353 59.9194   1
  -1   0 -40 44.3642 55.6603   3
   1   0  40 71.6460 62.0656   2
   1   0  41 24.5208 62.5864   1
  -1   0 -41 45.6574 56.1235   3
  -1   0 -41 81.9363 61.5859   4
   1   0  41 2.49033 55.8226   2
  -1   0 -42 166.500 71.0918   3
   1   0  42 136.506 67.1960   2
  -1   0 -42 223.686 76.8877   4
   1   0  42 214.554 81.7946   1
   1   0  43-5.12970 69.4100   1
  -1   0 -43 55.1100 59.2247   4
  -1   0 -43-43.6330 59.4519   3
   1   0  43 95.2202 65.6892   2
  -1   0 -44 23.9261 54.8923   3
   1   0  44-96.6403 72.3910   2
  -1   0 -44-17.8604 59.9718   4
   1   0  45 84.8409 71.3017   1
  -1   0 -45 11.1676 54.9289   4
  -1   0 -45-97.1761 66.0193   3
   1   0  45 5.89945 63.5921   2
  -1   0 -46 864.251 116.225   3
  -1   0 -46 952.788 127.801   4
   1   0  46 791.102 125.410   2
   1   0  46 690.356 125.788   1
  -1   0 -47 25.8556 59.3002   3
   1   0  47 107.927 72.8480   2
  -1   0 -47 84.3580 72.3251   4
   1   0  47 87.7858 70.9411   1
   1   0  48 48.7376 68.3332   1
  -1   0 -48 119.336 74.9201   3
   1   0  48 5.28318 69.4096   2
  -1   0 -48-27.2673 58.2407   4
   1   0  49-105.688 81.6731   1
  -1   0 -49 78.2304 73.6132   3
  -1   0 -49-69.7474 67.5482   4
   1   0  49-99.5465 76.1494   2
  -1   0 -50-22.8034 63.6855   4
   1   0  50-164.830 92.0331   2
   1   0  50 53.5780 72.9851   1
  -1   0 -50 91.2903 75.0395   3
  -1   0 -51 32.3964 67.4246   4
  -1   0 -51 153.979 76.3376   3
   1   0  51-107.475 79.2620   2
   1   0  51-30.0496 74.0835   1
   1   0  52 541.212 111.996   2
  -1   0 -52 490.937 109.873   3
   1   0  52 546.524 126.716   1
  -1   0 -52 726.863 129.738   4
  -1   0 -53 20.5927 72.2021   4
   1   0  53-61.9982 82.7932   2
   1   0  53-41.1699 81.6794   1
   1   0  54 141.017 87.1737   2
  -1   0 -54 274.142 97.7614   4
   1   0  54 211.764 96.3178   1
   1   0  55-34.2477 83.7370   2
   1   0  55 109.270 97.8824   1
  -1   0 -55 7.02502 72.8452   4
   1   0  56 583.914 144.357   1
  -1   0 -56 755.087 142.308   4
   1   0  57-104.546 100.962   1
  -1   0 -57-52.5562 82.8414   4
   1   0  58 77.5765 104.156   1
  -1   0 -58 104.911 89.4895   4
  -1  -1  59-23.6847 94.8953   1
  -1  -1  58 81.8770 94.6589   1
  -1   1  58-35.7626 91.0367   2
  -1  -1  57 388.154 125.272   1
   1  -1 -57 257.459 109.680   3
  -1   1  57 191.646 112.207   2
   1   1 -57 90.2410 86.3011   3
   1   1 -56 327.583 116.547   3
  -1  -1  56 396.624 123.985   1
   1  -1 -56 321.597 121.394   3
  -1   1  56 218.276 111.786   2
   1  -1 -55-70.1850 90.0602   3
   1   1 -55 138.556 89.3669   3
  -1   1  55 82.0251 106.248   2
  -1  -1  55 12.8731 80.0775   1
  -1  -1  54 117.584 92.4836   1
  -1   1  54-46.2940 99.6102   2
   1   1 -54 86.0504 86.9478   3
   1  -1 -54 124.758 90.3673   3
  -1  -1  54 204.709 100.865   2
   1  -1 -53-26.3937 76.7901   3
  -1   1  53 146.747 93.3666   2
   1   1 -53 11.4423 78.5338   3
  -1  -1  53 204.608 92.8975   2
  -1  -1  53 13.8030 73.9520   1
   1  -1 -52 8.91503 77.8115   3
   1   1 -52 14.8806 79.0440   3
  -1   1  52 170.929 96.4927   2
  -1  -1  52-41.9758 74.0978   2
  -1  -1  52-60.0251 86.7932   1
   1  -1 -51-42.0343 76.3675   3
   1   1 -51 150.648 90.8023   3
  -1  -1  51 53.6671 73.1309   1
  -1   1  51 101.953 91.7339   2
  -1  -1  51 34.1616 75.4964   2
  -1  -1  50 94.3231 74.7031   2
  -1  -1  50-79.8887 82.1005   1
   1  -1 -50 67.9688 81.2876   3
   1   1 -50-31.3459 69.7031   3
  -1   1  50 188.799 90.9249   2
  -1   1  49-12.9725 64.5048   1
  -1  -1  49 84.8017 79.8398   1
  -1   1  49 78.1343 79.8714   2
  -1  -1  49 59.8445 70.8441   2
   1  -1 -49 15.2511 74.5066   3
   1   1 -49 30.5900 69.8228   3
  -1   1  48-6.63189 68.5343   2
   1   1 -48-29.6487 64.0014   3
  -1  -1  48-83.9096 75.6264   1
  -1  -1  48-61.1094 64.7816   2
  -1   1  48 115.634 78.4106   1
   1  -1 -48 90.1516 81.1983   3
  -1  -1  47-24.8003 70.5125   2
  -1   1  47 205.329 94.2903   2
   1   1 -47 102.961 58.4623   4
   1  -1 -47-46.5275 70.2697   3
  -1  -1  47-8.61466 69.0770   1
   1   1 -47-90.0858 70.8549   3
  -1   1  47-19.5562 54.8420   1
  -1   1  46 30.7095 59.2689   1
   1  -1 -46 45.8016 72.6644   3
   1   1 -46 173.605 80.1050   3
  -1   1  46 75.6166 78.7355   2
   1   1 -46 153.642 59.9628   4
  -1  -1  46 109.143 66.8042   1
   1  -1 -46 59.0462 52.4448   4
  -1  -1  46-105.024 72.4714   2
  -1  -1  45 151.469 74.8807   1
   1  -1 -45-46.7403 66.9412   3
  -1  -1  45 71.4404 71.4478   2
   1   1 -45 23.0942 51.2094   4
  -1   1  45 90.4852 62.6890   1
  -1   1  45 100.149 81.5074   2
   1   1 -45 7.57798 66.8770   3
   1  -1 -45 13.3204 45.5749   4
  -1  -1  44-45.7457 60.5617   1
   1   1 -44 23.7363 63.5876   3
  -1  -1  44 25.7353 61.9363   2
   1   1 -44 43.1341 48.8246   4
  -1   1  44 2.49068 51.8015   1
   1  -1 -44 18.6283 62.8451   3
   1  -1 -44-47.3740 54.3186   4
  -1   1  44 26.6095 71.9200   2
  -1   1  43-47.3711 55.8883   1
  -1  -1  43-110.601 71.0182   2
   1  -1 -43 55.1053 50.2868   4
   1   1 -43-80.4292 55.9955   4
  -1  -1  43-2.32943 58.4482   1
  -1   1  43 60.0945 74.4513   2
   1  -1 -43 78.4235 73.3407   3
   1   1 -43 65.7359 71.9269   3
   1   1 -42 50.1891 45.6386   4
  -1   1  42-15.5557 54.2820   1
  -1  -1  42-16.3236 58.7224   1
   1  -1 -42-53.2183 62.8424   3
   1  -1 -42-35.6837 45.2549   4
   1   1 -42 71.1730 63.0177   3
  -1   1  42 93.4681 74.5208   2
  -1  -1  42 2.95620 54.8776   2
  -1  -1  41-35.4925 59.2669   1
   1  -1 -41 62.0197 73.8645   3
   1   1 -41-46.5822 48.0199   4
  -1  -1  41 47.1579 56.4931   2
   1   1 -41-56.0329 65.1408   3
  -1   1  41-47.4392 60.9456   2
   1  -1 -41 41.6849 51.9109   4
  -1   1  41 151.093 66.7024   1
   1   1 -40 46.1150 47.9736   4
  -1  -1  40 41.1679 54.5284   2
  -1   1  40-96.0922 68.6370   2
   1  -1 -40-21.6417 57.2398   3
   1  -1 -40 17.0472 43.8135   4
  -1  -1  40 96.3376 71.4271   1
   1   1 -40-42.4498 61.4722   3
  -1   1  40 94.5639 53.3728   1
   1  -1 -39 13.9892 43.6100   4
   1  -1 -39 24.7870 61.7263   3
   1   1 -39-63.2533 65.1008   3
   1   1 -39-54.7353 45.8112   4
  -1  -1  39 46.3727 53.0257   2
  -1   1  39 4.35397 57.4120   2
  -1  -1  39 47.6272 58.9440   1
  -1   1  39-53.2950 49.9523   1
   1   1 -38 132.556 67.9028   3
   1  -1 -38 94.8119 52.0215   4
  -1  -1  38 110.956 57.4612   2
  -1  -1  38 103.219 66.0605   1
  -1   1  38 34.9060 58.5650   2
   1   1 -38 66.0925 40.8492   4
   1  -1 -38 118.182 70.0988   3
  -1   1  38 157.153 59.7406   1
   1   1 -37 266.141 60.3383   4
  -1  -1  37 266.780 73.7447   2
   1  -1 -37 300.292 60.0223   4
  -1   1  37 344.804 90.3364   2
  -1  -1  37 436.753 85.4556   1
  -1   1  37 225.030 66.6057   1
   1  -1 -37 277.186 81.0761   3
   1   1 -37 245.451 69.0021   3
   1  -1 -36 203.245 71.2582   3
   1   1 -36 382.922 65.3736   4
  -1   1  36 418.593 71.8307   1
  -1  -1  36 349.216 78.0173   1
   1  -1 -36 411.675 64.1704   4
  -1   1  36 416.368 93.0250   2
   1   1 -36 282.368 77.8735   3
  -1  -1  36 365.651 76.5554   2
  -1  -1  35 288.949 65.5085   2
   1  -1 -35 303.810 59.6031   4
  -1   1  35 311.658 76.6864   2
  -1   1  35 353.342 67.9939   1
   1  -1 -35 364.059 84.7107   3
   1   1 -35 311.107 55.4476   4
   1   1 -35 274.364 72.3610   3
  -1  -1  35 201.052 60.7738   1
  -1   1  34 266.693 63.6525   1
   1   1 -34 404.308 64.2780   4
   1  -1 -34 423.381 65.6906   4
   1  -1 -34 274.893 78.7544   3
  -1  -1  34 247.114 65.8348   1
   1   1 -34 204.667 67.2447   3
  -1   1  34 379.410 81.8597   2
  -1  -1  34 314.912 67.7797   2
   1  -1 -33 56.4270 53.0511   3
   1   1 -33 113.387 43.2945   4
   1  -1 -33 106.575 42.0261   4
  -1  -1  33 127.706 55.0648   2
  -1   1  33 213.289 58.9719   1
  -1  -1  33 21.0038 48.7162   1
   1   1 -33 73.7793 57.9480   3
  -1   1  33 12.3241 49.8702   2
   1  -1 -32 173.853 68.4621   3
  -1   1  32 144.566 48.0597   1
  -1   1  32 253.651 68.2599   2
  -1  -1  32 209.002 59.4719   2
  -1  -1  32 251.863 68.5501   1
   1   1 -32 288.431 56.7706   4
   1  -1 -32 187.170 47.8918   4
   1   1 -32 189.861 55.6390   3
   1  -1 -31 321.776 57.1668   4
  -1  -1  31 149.386 54.9215   1
   1   1 -31 286.231 67.6850   3
  -1   1  31 295.045 68.3175   2
  -1   1  31 280.583 57.8766   1
   1   1 -31 364.562 63.1947   4
   1  -1 -31 350.649 77.6594   3
  -1  -1  31 327.253 65.6361   2
   1   1 -30 1369.72 96.7939   4
   1  -1 -30 1365.23 96.3963   4
  -1  -1  30 1090.88 106.427   1
   1   1 -30 1211.93 116.097   3
  -1   1  30 1244.40 120.059   2
  -1  -1  30 1287.66 108.696   2
   1  -1 -30 1243.04 116.033   3
  -1   1  30 1209.27 98.3397   1
   1  -1 -29 503.840 62.6969   4
  -1   1  29 390.958 58.2073   1
  -1  -1  29 406.131 67.8007   2
   1   1 -29 342.577 68.0465   3
  -1   1  29 437.728 77.3836   2
   1  -1 -29 442.846 79.1824   3
   1   1 -29 441.826 60.7433   4
  -1  -1  29 388.816 70.2244   1
   1  -1 -28 249.024 48.9882   4
  -1   1  28 292.900 54.5207   1
   1   1 -28 308.400 52.2484   4
  -1  -1  28 158.493 47.7798   2
   1   1 -28 210.149 59.0343   3
  -1  -1  28 218.023 57.4277   1
   1  -1 -28 186.431 53.3891   3
  -1   1  28 279.426 69.1493   2
   1   1 -27 133.731 48.2185   3
   1  -1 -27 130.023 41.5489   4
  -1  -1  27 133.885 50.8516   1
  -1  -1  27 158.066 48.3001   2
   1   1 -27 209.580 42.8437   4
   1  -1 -27 147.347 52.6636   3
  -1   1  27 114.592 45.9258   2
  -1   1  27 156.815 44.1462   1
   1   1 -26 105.925 37.2586   4
  -1  -1  26 78.1298 48.7369   1
   1   1 -26 78.1637 44.1458   3
  -1   1  26 58.3489 44.6283   2
   1  -1 -26 76.7850 34.7505   4
  -1  -1  26 135.081 46.2159   2
   1  -1 -26 136.313 53.8913   3
  -1   1  26 90.6451 38.8382   1
  -1  -1  25 46.8974 39.3646   1
  -1   1  25 56.5401 44.0920   2
  -1   1  25 104.295 38.3606   1
   1  -1 -25 36.1171 44.7973   3
   1   1 -25 19.8504 42.0382   3
   1  -1 -25 23.5388 29.5469   4
  -1  -1  25 57.0547 36.8773   2
   1   1 -25 31.5116 28.7933   4
  -1   1  24 211.970 44.7172   1
   1   1 -24 307.568 64.6916   3
  -1   1  24 269.863 61.4921   2
   1  -1 -24 319.797 45.4496   4
   1  -1 -24 283.520 65.5287   3
   1   1 -24 273.768 45.6262   4
  -1  -1  24 255.638 49.9571   2
  -1  -1  24 220.604 53.1001   1
  -1  -1  23 272.090 56.6869   2
   1  -1 -23 224.003 41.6569   4
   1   1 -23 187.471 39.1097   4
   1  -1 -23 237.567 61.8004   3
  -1   1  23 88.9247 44.4416   2
  -1   1  23 189.750 42.2430   1
  -1  -1  23 136.255 44.1833   1
   1   1 -23 207.881 55.9316   3
  -1  -1  22 142.335 51.2867   1
   1  -1 -22 90.0102 34.6851   4
  -1   1  22 97.9486 45.2212   2
  -1  -1  22 123.007 40.7312   2
   1   1 -22 103.969 49.1806   3
   1  -1 -22 196.593 58.2394   3
   1   1 -22 139.076 33.9518   4
  -1   1  22 122.459 35.9490   1
  -1  -1  21 129.771 49.3812   1
  -1   1  21 147.560 49.3977   2
   1   1 -21 142.721 35.6798   4
   1  -1 -21 145.911 51.1262   3
  -1  -1  21 143.769 41.5449   2
   1   1 -21 99.0849 46.2141   3
   1  -1 -21 109.007 32.0260   4
  -1   1  21 87.9706 34.1386   1
   1  -1 -20 270.304 59.3290   3
   1  -1 -20 268.944 43.4951   4
  -1   1  20 223.494 51.7006   2
   1   1 -20 285.630 42.4034   4
  -1  -1  20 224.183 52.1530   1
  -1   1  20 311.419 46.7168   1
   1   1 -20 290.283 59.6070   3
  -1  -1  20 295.738 51.8851   2
   1  -1 -19 1007.58 96.5231   3
  -1   1  19 1049.57 69.1220   1
  -1  -1  19 1128.47 86.8379   1
  -1   1  19 1208.97 94.0375   2
   1   1 -19 1132.45 92.8301   3
  -1  -1  19 1165.88 81.6792   2
   1   1 -19 1108.03 67.8059   4
   1  -1 -19 1161.11 68.4244   4
   1   1 -18 7793.80 165.763   4
   1  -1 -18 8092.36 227.223   3
   1  -1 -18 7960.95 164.835   4
  -1  -1  18 7791.15 208.465   1
  -1   1  18 8043.06 219.885   2
  -1  -1  18 7995.91 196.147   2
   1   1 -18 7802.29 213.925   3
  -1   1  18 7865.69 172.330   1
   1   1 -17 1822.24 107.823   3
  -1  -1  17 1989.90 99.4954   2
   1   1 -17 1848.26 80.5151   4
  -1  -1  17 1826.82 104.069   1
  -1   1  17 2051.25 112.924   2
  -1   1  17 1897.42 84.3059   1
   1  -1 -17 1933.49 81.6583   4
   1  -1 -17 1939.44 114.228   3
  -1  -1  16 815.505 70.3990   1
  -1   1  16 813.739 56.6908   1
   1   1 -16 972.518 81.1145   3
  -1  -1  16 769.674 65.6159   2
   1   1 -16 835.725 55.3117   4
   1  -1 -16 840.201 83.2983   3
   1  -1 -16 859.677 55.3484   4
  -1   1  16 760.654 71.8478   2
   1  -1 -15 165.967 48.8839   3
  -1   1  15 133.251 26.9579   1
   1  -1 -15 136.973 31.1096   4
  -1   1  15 132.999 42.1505   2
  -1  -1  15 177.954 42.8804   2
   1   1 -15 94.4551 41.6276   3
  -1  -1  15 115.442 38.0693   1
   1   1 -15 162.470 31.8893   4
   1   1 -14 440.875 40.2823   4
  -1  -1  14 454.123 49.1210   2
   1  -1 -14 497.282 41.0148   4
  -1   1  14 456.966 41.6141   1
  -1  -1  14 455.837 55.4887   1
   1  -1 -14 259.767 54.0060   3
   1   1 -14 390.768 56.0465   3
  -1   1  14 414.011 57.4665   2
  -1  -1  13 211.700 43.8461   1
   1   1 -13 236.827 32.3192   4
  -1   1  13 284.226 34.6169   1
   1   1 -13 142.085 44.3866   3
   1  -1 -13 204.232 52.6523   3
  -1   1  13 175.664 37.6449   2
   1  -1 -13 235.365 31.1572   4
  -1  -1  13 224.490 37.9147   2
   1   1 -12 92.5078 28.1089   4
  -1  -1  12 37.5437 31.8773   1
  -1   1  12 77.0531 25.9849   4
   1   1 -12 91.4307 41.9237   3
  -1   1  12 88.8130 37.7041   2
  -1   1  12 60.4226 22.7090   1
  -1  -1  12 80.8764 32.7621   2
   1  -1 -12 85.3697 43.2125   3
   1  -1 -12 71.0674 24.3643   4
   1   1 -11 382.851 52.3967   3
   1  -1 -11 483.355 37.3988   1
  -1   1  11 493.446 38.3078   1
   1  -1 -11 535.572 37.1157   4
  -1   1  11 422.766 35.0392   4
   1  -1 -11 468.695 62.8637   3
  -1  -1  11 505.743 53.9026   1
  -1   1  11 495.373 54.1922   2
   1   1 -11 508.572 38.5054   4
  -1  -1  11 438.955 45.4900   2
  -1  -1  10 945.273 65.1504   1
  -1   1  10 1072.31 72.6147   2
   1  -1 -10 770.724 69.4315   3
  -1  -1  10 995.870 61.4446   2
   1   1 -10 1025.81 68.6338   3
  -1   1  10 662.156 46.3119   4
   1  -1 -10 1062.78 45.6546   4
  -1   1  10 1107.66 50.3314   1
  -1  -1  10 825.078 49.9284   4
   1   1 -10 1033.58 48.2251   4
   1  -1 -10 1023.36 48.3911   1
   1   1  -9 801.972 42.1313   4
  -1  -1   9 582.501 41.6650   4
  -1   1   9 776.687 59.5795   2
  -1   1   9 937.538 46.2014   1
   1  -1  -9 822.420 38.9529   4
  -1  -1   9 707.432 52.8070   2
   1   1  -9 695.932 57.0967   3
  -1   1   9 534.501 39.9732   4
   1  -1  -9 846.340 42.3887   1
  -1  -1   9 739.766 59.8017   1
   1  -1  -9 540.920 57.0543   3
  -1   1   8 2072.93 59.3224   4
  -1  -1   8 2224.62 89.8379   1
   1   1  -8 2174.74 89.6203   3
  -1   1   8 2490.19 69.0301   1
   1  -1  -8 2384.72 62.6958   4
   1   1  -8 2281.82 65.6054   4
  -1  -1   8 1787.13 63.5278   4
  -1   1   8 2213.68 92.1550   2
   1  -1  -8 2353.39 64.4763   1
   1  -1  -8 2112.76 99.8674   3
  -1  -1   8 2259.72 82.0486   2
  -1  -1   7 113.309 30.3570   2
  -1  -1   7 147.361 28.6442   4
   1   1  -7 117.001 34.6907   3
  -1   1   7 156.622 25.1964   4
  -1   1   7 173.774 26.4015   1
  -1   1   7 172.184 35.5850   2
  -1  -1   7 73.1945 29.8669   1
   1  -1  -7 120.285 21.5914   4
   1  -1  -7 172.329 23.5046   1
  -1  -1   7 83.1551 25.7471   4
   1  -1  -7 142.914 38.3120   3
  -1   1   6 1686.56 56.2731   4
   1   1  -6 2216.48 85.2854   3
   1  -1  -6 2146.69 55.8981   4
  -1  -1   6 1795.26 61.6592   4
  -1  -1   6 2172.18 85.1888   1
   1  -1  -6 1814.70 85.7146   3
   1  -1  -6 2259.83 60.0482   1
  -1  -1   6 2002.46 67.3438   4
  -1  -1   6 2178.74 77.7695   2
  -1   1   6 2184.30 62.2162   1
  -1   1   6 2112.47 80.5060   2
   1  -1  -5 166.535 22.4379   1
  -1  -1   5 185.597 36.9641   1
  -1  -1   5 161.566 26.7316   4
   1  -1  -5 195.093 21.9645   4
  -1   1   5 201.232 32.8247   2
  -1  -1   5 194.236 29.0959   4
   1   1  -5 198.731 34.9124   2
  -1   1   5 131.634 24.7174   4
   1   1  -5 250.577 40.1637   3
   1  -1  -5 216.814 40.3608   3
  -1   1   5 182.817 25.2935   1
  -1   1   4 3661.84 94.9694   2
  -1  -1   4 3356.00 82.0059   4
  -1   1   4 3734.61 78.0435   1
  -1  -1   4 3645.50 101.835   1
  -1   1   4 3650.84 99.6052   3
   1  -1  -4 3709.50 75.8705   4
   1  -1  -4 3518.21 72.2556   4
   1   1  -4 3702.00 86.9935   4
   1   1  -4 3712.47 102.587   3
   1  -1  -4 3836.60 78.6789   1
   1   1  -4 2999.44 89.9337   2
   1   1  -3 145.961 36.4899   3
  -1   1   3 133.948 29.1922   2
   1  -1  -3 142.343 30.6626   3
  -1   1   3 119.233 21.8040   1
   1  -1  -3 122.314 21.2077   1
   1   1  -3 121.330 33.6635   2
   1  -1  -3 147.500 28.7217   2
  -1   1   3 156.610 30.4207   3
   1  -1  -3 185.778 25.3065   4
  -1  -1   3 230.910 39.0172   1
  -1  -1   3 75.3526 29.2647   3
   1  -1  -3 145.262 22.4559   4
   1   1  -3 138.517 25.4838   4
  -1  -1   3 124.496 27.7147   4
   1   1  -2 6032.52 129.156   2
  -1  -1   2 5574.42 125.769   1
  -1   1   2 5624.01 95.8748   4
  -1   1   2 5870.36 112.158   3
   1  -1  -2 5734.21 96.6452   1
  -1   1   2 5750.71 108.772   2
   1  -1  -2 5859.11 96.5904   4
  -1  -1   2 5837.59 107.627   4
   1  -1  -2 5676.19 107.699   2
  -1   1   2 5593.90 94.2377   1
   1   1  -2 6043.31 109.349   4
   1  -1  -2 5845.55 111.245   3
  -1  -1   2 4835.29 118.289   3
   1   1  -2 6112.41 119.364   3
   1   1  -1 930.109 59.7546   2
  -1  -1   1 993.338 54.9301   3
  -1   1   1 876.110 43.1301   4
   1   1  -1 951.774 50.0717   3
   1   1  -1 956.858 49.0251   4
  -1  -1   1 831.572 46.8074   4
  -1  -1   1 912.352 56.2799   1
  -1   1   1 966.387 47.1068   2
   1  -1  -1 987.944 47.5000   3
  -1   1   1 900.105 42.3348   1
   1  -1  -1 926.672 42.2469   1
   1  -1  -1 975.284 45.0686   2
   1  -1  -1 943.122 43.1144   4
  -1   1   1 987.950 47.0855   3
   1  -1   0 17574.6 175.557   3
   1   1   0 17434.2 181.987   3
  -1  -1   0 16890.4 188.866   4
  -1  -1   0 16716.9 192.237   3
  -1   1   0 17163.8 172.770   3
   1  -1   0 17537.8 175.144   4
   1   1   0 16945.2 188.126   4
  -1   1   0 17175.3 173.129   2
  -1   1   0 17348.6 174.100   1
   1   1   0 17825.5 215.988   2
   1  -1   0 17237.1 169.400   2
   1  -1   0 17178.1 172.830   1
  -1   1   0 17405.1 177.144   4
  -1  -1   0 16953.8 201.051   1
   1   1   1 29895.0 252.578   4
   1  -1   1 29656.6 240.079   4
   1  -1   1 29558.9 213.356   2
  -1  -1  -1 29237.2 245.481   3
  -1   1  -1 29439.2 218.307   3
   1   1   1 30263.3 279.555   2
   1   1   1 30012.7 227.687   3
  -1  -1  -1 29295.5 260.850   1
  -1   1  -1 29937.9 240.552   4
  -1   1  -1 29572.6 235.385   1
  -1   1  -1 29616.7 219.982   2
  -1  -1  -1 29214.8 252.442   4
   1  -1   1 29547.4 220.965   3
   1  -1   1 30058.1 234.027   1
  -1  -1  -2 43811.7 315.443   1
   1  -1   2 43495.9 300.364   1
   1   1   2 43133.3 265.497   3
   1  -1   2 44016.9 309.449   4
  -1  -1  -2 44786.0 316.422   4
   1  -1   2 48999.3 270.899   3
  -1   1  -2 44232.5 299.505   1
  -1  -1  -2 39024.6 270.443   3
   1  -1   2 44524.0 249.617   2
   1   1   2 44060.4 319.901   4
  -1   1  -2 44121.7 303.340   4
   1   1   2 45300.1 354.617   2
  -1   1  -2 44260.0 261.291   3
  -1   1  -3 8456.62 141.135   4
  -1   1  -3 8504.22 139.071   1
   1   1   3 8384.52 117.858   3
  -1  -1  -3 7685.98 118.832   3
   1  -1   3 8476.36 109.435   2
   1  -1   3 8735.97 113.643   3
   1   1   3 8376.00 161.513   2
   1  -1   3 9046.51 116.241   2
  -1  -1  -3 8233.74 141.316   4
  -1   1  -3 8868.20 116.169   3
  -1  -1  -3 8119.51 138.819   1
  -1   1  -4 3543.67 98.2175   4
  -1   1  -4 3798.52 74.3798   2
   1  -1   4 3265.18 77.4430   2
   1  -1   4 3829.06 76.8009   3
   1   1   4 3727.88 105.572   2
  -1  -1  -4 3329.52 91.4990   1
   1  -1   4 3645.15 99.2053   1
  -1  -1  -4 3542.22 96.3804   4
  -1  -1  -4 3335.13 76.1688   3
   1   1   4 3492.20 77.7385   3
  -1   1  -4 3788.51 78.2654   3
  -1   1  -5 143.192 24.1148   2
  -1  -1  -5 99.0981 31.0945   4
  -1  -1  -5 121.042 30.4584   1
   1   1   5 117.621 23.7845   3
  -1   1  -5 128.774 31.8612   4
   1  -1   5 106.265 33.1022   1
   1  -1   5 122.340 23.4875   3
  -1  -1  -5 79.3585 24.5534   3
  -1   1  -5 160.875 25.6636   3
   1  -1   5 131.259 23.7809   2
   1   1   5 178.185 41.7895   2
  -1   1  -6 435.072 45.3546   4
   1  -1   6 428.146 45.9193   1
  -1  -1  -6 382.557 39.3547   1
   1  -1   6 476.785 31.9762   2
   1  -1   6 446.592 34.9958   3
  -1   1  -6 525.822 35.5440   3
  -1  -1  -6 380.083 42.8900   4
   1   1   6 437.271 33.5298   3
  -1  -1  -6 391.300 36.9708   3
  -1   1  -6 527.276 37.0471   2
   1   1   6 406.021 45.0734   2
   1  -1   7 309.305 36.5359   3
  -1   1  -7 422.566 35.5254   2
   1  -1   7 346.862 43.8771   1
  -1   1  -7 377.677 43.6428   4
  -1  -1  -7 410.416 47.5653   4
   1   1   7 370.650 34.4649   3
  -1  -1  -7 300.536 36.3979   1
  -1   1  -7 410.827 37.6115   3
  -1  -1  -7 270.379 34.9906   3
   1  -1   7 405.057 29.3761   2
   1   1   7 353.230 47.0952   2
  -1  -1  -8 3897.99 105.613   1
  -1   1  -8 4193.49 122.229   4
   1   1   8 4005.41 121.729   2
  -1  -1  -8 3684.43 90.6000   3
  -1   1  -8 4830.18 104.494   3
  -1  -1  -8 3947.34 119.740   4
   1  -1   8 4378.93 95.7986   3
   1  -1   8 4243.94 120.036   1
  -1   1  -8 4150.38 96.3455   2
   1  -1   8 4492.28 85.8285   2
   1   1   8 4146.33 94.6705   3
  -1  -1  -9 182.130 31.2200   3
   1   1   9 250.692 32.9589   3
  -1   1  -9 258.884 33.5659   2
   1  -1   9 264.236 31.4072   3
  -1  -1  -9 209.663 39.6420   4
  -1  -1  -9 206.566 33.8915   1
   1  -1   9 311.797 44.2289   1
   1   1   9 211.214 42.2019   2
  -1   1  -9 176.929 41.6202   4
  -1   1  -9 332.477 37.0355   3
   1  -1   9 267.233 26.1698   2
   1  -1  10 1684.13 66.2165   3
   1  -1  10 1979.33 91.5480   1
  -1   1 -10 2426.62 83.1662   3
   1   1  10 2002.91 91.6041   2
  -1   1 -10 1820.31 90.4424   4
   1   1  10 1987.45 72.9163   3
  -1   1 -10 2075.11 74.8127   2
  -1  -1 -10 1868.29 80.8757   1
  -1  -1 -10 1996.19 94.4299   4
   1  -1  10 2251.89 66.3922   2
  -1   1 -11 918.566 70.7161   4
  -1  -1 -11 1185.04 77.8454   4
  -1  -1 -11 1560.05 73.9518   3
  -1   1 -11 1366.10 62.2309   2
   1  -1  11 1556.50 58.5904   2
  -1  -1 -11 1406.96 70.4226   1
  -1   1 -11 1755.72 74.3442   3
   1   1  11 1380.16 80.4941   2
   1  -1  11 1489.38 83.6847   1
  -1  -1 -12 1016.64 74.8341   4
  -1   1 -12 1136.14 64.3761   3
   1  -1  12 897.125 71.6110   1
  -1  -1 -12 1097.14 65.1326   3
   1   1  12 993.992 70.4131   2
   1  -1  12 1195.44 55.6353   2
  -1   1 -12 935.396 73.2144   4
  -1  -1 -13 75.5240 39.4848   4
  -1  -1 -13 59.6653 33.0666   3
   1  -1  13 17.9161 23.8663   2
   1   1  13-6.00761 34.2187   2
  -1   1 -13 44.3739 38.6601   4
   1  -1  13 1.57270 34.0834   1
  -1   1 -13 40.4751 32.5821   3
   1   1  13 38.3587 30.8346   1
  -1   1 -14 1427.07 89.7763   4
  -1   1 -14 1633.40 79.7011   3
   1  -1  14 1707.56 72.2255   2
   1   1  14 1458.12 89.8212   2
  -1  -1 -14 1492.27 90.2200   4
  -1  -1 -14 1735.15 90.4086   3
   1   1  14 1458.00 81.7990   1
   1  -1  14 1481.83 93.1710   1
   1   1  15 319.475 54.2029   2
  -1   1 -15 494.169 50.1831   3
   1  -1  15 422.834 46.1314   2
  -1   1 -15 362.059 51.3241   4
  -1  -1 -15 390.238 49.8984   3
   1   1  15 378.995 51.8256   1
   1  -1  15 364.408 54.7690   1
  -1  -1 -15 389.234 53.9243   4
   1  -1  16 1147.23 84.3678   1
  -1   1 -16 1116.88 83.2605   4
  -1   1 -16 1242.18 73.8295   3
   1  -1  16 1150.97 66.8470   2
  -1  -1 -16 1209.66 87.8712   4
   1   1  16 1095.22 82.6261   2
  -1  -1 -16 1174.73 80.2005   3
   1   1  16 1074.40 73.4184   1
   1   1  17 1545.61 99.1277   2
  -1  -1 -17 1654.05 102.127   4
  -1   1 -17 1601.91 87.2420   3
   1  -1  17 1780.62 83.6074   2
  -1  -1 -17 1738.19 95.9043   3
   1  -1  17 1710.13 105.496   1
  -1   1 -17 1620.98 101.641   4
   1   1  17 1510.09 87.7091   1
   1  -1  18 2257.47 124.743   1
   1   1  18 2507.24 128.726   2
  -1  -1 -18 2651.31 119.795   3
  -1   1 -18 2717.29 111.930   3
   1  -1  18 2700.50 105.083   2
  -1   1 -18 2611.54 126.997   4
   1   1  18 2277.42 108.342   1
  -1  -1 -18 2490.50 124.662   4
  -1   1 -19-21.9656 35.4080   4
   1  -1  19 56.4564 44.9877   1
   1   1  19 49.6988 46.6793   2
   1   1  19-11.6654 33.6034   1
  -1   1 -19-12.3118 31.9940   3
  -1  -1 -19 56.7158 37.5891   3
  -1  -1 -19 26.6209 36.8136   4
   1  -1  19-41.3257 31.9864   2
   1   1  20 377.930 56.1862   1
   1  -1  20 369.588 64.4763   1
  -1   1 -20 305.114 56.7656   4
   1   1  20 345.022 61.4763   2
  -1  -1 -20 461.840 66.9096   4
  -1   1 -20 350.514 50.8583   3
  -1  -1 -20 357.175 57.9259   3
   1  -1  20 425.779 54.1167   2
   1  -1  21 242.388 56.6499   1
  -1  -1 -21 215.572 53.8136   4
  -1  -1 -21 165.316 49.3519   3
  -1   1 -21 217.743 45.4213   3
   1   1  21 150.863 41.0781   1
   1  -1  21 141.322 38.0196   2
   1   1  21 212.973 54.1740   2
  -1   1 -21 175.046 48.9134   4
  -1   1 -22 201.937 52.7465   4
  -1  -1 -22 261.550 52.9581   3
   1  -1  22 229.530 55.1336   1
   1  -1  22 171.450 41.3192   2
  -1  -1 -22 172.717 53.1765   4
  -1   1 -22 191.484 42.5570   3
   1   1  22 249.436 60.9978   2
   1   1  22 222.323 49.4223   1
   1   1  23 1005.05 92.6303   2
   1   1  23 913.893 82.9308   1
  -1   1 -23 982.247 79.5689   3
  -1  -1 -23 957.884 88.5301   4
  -1  -1 -23 881.178 82.3228   3
  -1   1 -23 981.091 86.6795   4
   1  -1  23 1061.44 79.0311   2
   1  -1  23 946.348 93.1372   1
   1  -1  24 1196.81 86.7423   2
  -1   1 -24 1101.01 97.0479   4
  -1  -1 -24 1242.54 103.056   4
   1  -1  24 905.587 91.9070   1
  -1  -1 -24 1177.16 92.2958   3
  -1   1 -24 1173.49 88.6882   3
   1   1  24 1073.44 90.0453   1
   1   1  24 1281.65 105.042   2
  -1   1 -25 61.4321 40.7677   4
   1  -1  25 79.9346 39.8766   2
  -1   1 -25 74.6019 39.0641   3
   1  -1  25-13.5152 41.2121   1
   1   1  25 1.69897 43.4356   2
   1   1  25 59.0104 42.6709   1
  -1  -1 -25 66.6118 49.0888   4
  -1  -1 -25 7.73483 37.8636   3
   1   1  26 1145.28 98.6737   1
   1  -1  26 985.732 102.499   1
  -1  -1 -26 1158.42 102.450   4
  -1   1 -26 1229.93 92.5162   3
  -1  -1 -26 1280.43 101.848   3
  -1   1 -26 1220.64 102.508   4
   1   1  26 1286.44 109.620   2
   1  -1  26 1209.09 91.3769   2
  -1  -1 -27 321.189 66.0031   4
  -1   1 -27 173.643 45.2577   3
  -1   1 -27 216.044 52.9006   4
   1   1  27 276.991 66.2258   2
  -1  -1 -27 194.978 54.9815   3
   1  -1  27 250.890 51.2220   2
   1  -1  27 163.198 54.9094   1
   1   1  27 218.850 59.1281   1
  -1  -1 -28 42.2947 40.0307   3
   1  -1  28 171.016 58.8595   1
   1   1  28 152.416 54.4142   1
   1   1  28-21.0836 52.0070   2
  -1   1 -28 104.028 45.3961   3
   1  -1  28 105.852 40.9999   2
  -1   1 -28 21.8777 40.3738   4
  -1  -1 -28 120.598 53.5054   4
   1   1  29 83.3813 44.2689   1
  -1   1 -29 50.9321 56.1935   4
   1  -1  29-0.21975 50.4460   1
  -1   1 -29 90.4501 43.4241   3
   1  -1  29 153.843 48.2231   2
  -1  -1 -29 102.434 46.0060   3
  -1  -1 -29 93.4582 51.2058   4
   1   1  29 52.4708 46.3681   2
  -1   1 -30 280.305 66.2913   4
  -1  -1 -30 254.712 58.5674   4
   1   1  30 47.6301 44.6011   1
  -1  -1 -30 208.908 57.0133   3
  -1   1 -30 222.810 55.5427   3
   1   1  30 202.443 61.7864   2
   1  -1  30 224.069 52.6856   2
   1  -1  30 130.494 54.5423   1
   1   1  31 75.1778 51.1135   1
  -1  -1 -31 145.376 51.2257   3
   1   1  31 180.424 70.4484   2
   1  -1  31 103.475 54.5751   1
   1  -1  31 197.841 54.3098   2
  -1   1 -31 89.2663 50.8004   3
  -1  -1 -31 142.447 51.1593   4
  -1   1 -31 46.4830 45.8633   4
  -1   1 -32 1250.84 117.734   4
   1  -1  32 1057.08 97.9843   2
  -1  -1 -32 1200.46 116.211   4
   1  -1  32 897.231 112.658   1
   1   1  32 1238.49 124.285   2
  -1  -1 -32 1053.08 103.651   3
  -1   1 -32 920.229 94.6757   3
   1   1  32 1120.23 110.688   1
  -1  -1 -33 775.327 97.6327   3
  -1  -1 -33 725.524 95.8032   4
   1  -1  33 541.288 93.4051   1
   1  -1  33 675.317 84.8411   2
  -1   1 -33 641.025 82.4220   3
   1   1  33 623.228 88.7895   1
  -1   1 -33 763.662 98.2155   4
   1   1  33 767.951 102.797   2
   1  -1  34 1470.81 117.913   2
  -1  -1 -34 1386.27 128.694   4
   1  -1  34 1288.03 140.228   1
  -1   1 -34 1443.22 126.749   4
  -1   1 -34 1232.36 107.850   3
  -1  -1 -34 1343.93 121.039   3
   1   1  34 1245.21 126.337   2
   1   1  34 1138.31 117.083   1
   1  -1  35 35.3331 47.1501   2
  -1  -1 -35 93.7513 60.4881   3
  -1   1 -35 95.8776 53.7683   4
  -1  -1 -35-21.5296 51.5617   4
  -1   1 -35 83.3825 46.8895   3
   1   1  35-6.61547 55.9380   2
   1  -1  35-70.5612 63.4577   1
   1   1  35-99.8634 59.3342   1
  -1   1 -36 120.108 53.9625   4
  -1  -1 -36 28.5979 49.1459   4
  -1  -1 -36 156.022 63.8984   3
   1  -1  36 193.432 59.5117   2
   1   1  36 185.321 60.9440   1
   1   1  36 188.851 74.0862   2
   1  -1  36 160.237 66.5692   1
  -1   1 -36 180.976 58.6542   3
   1   1  37 361.372 83.3910   2
   1   1  37 382.158 86.3207   1
  -1   1 -37 346.173 71.3127   3
   1  -1  37 209.015 75.6216   1
  -1  -1 -37 334.304 75.6320   3
  -1  -1 -37 347.456 79.1509   4
  -1   1 -37 307.363 74.0432   4
   1  -1  37 261.697 65.8298   2
  -1  -1 -38 301.355 73.5105   4
  -1   1 -38 484.768 89.3395   4
  -1  -1 -38 538.140 92.2485   3
   1   1  38 316.228 87.2973   2
   1  -1  38 312.149 83.7237   1
   1   1  38 350.391 84.0806   1
  -1   1 -38 411.101 78.1027   3
   1  -1  38 263.235 65.1455   2
  -1   1 -39-25.8714 52.2814   4
   1   1  39-68.0683 66.2820   2
  -1  -1 -39 49.4316 56.7024   4
   1   1  39 63.8361 64.3295   1
   1  -1  39-87.1945 68.9693   1
  -1  -1 -39 145.724 63.0384   3
  -1   1 -39 151.060 62.1007   3
   1  -1  39 1.43453 50.1832   2
  -1  -1 -40 17.6977 60.7226   3
  -1   1 -40 28.0154 53.4356   3
  -1   1 -40 103.248 67.7440   4
   1   1  40 34.3495 59.2648   2
   1  -1  40-62.4538 59.8556   2
   1  -1  40-51.3159 60.0211   1
  -1  -1 -40-104.598 68.7691   4
   1   1  40 109.519 70.9509   1
   1   1  41 43.5764 57.2264   1
  -1   1 -41-10.0764 53.9069   4
   1   1  41 2.53399 66.9191   2
   1  -1  41-32.3945 67.3881   1
  -1  -1 -41 14.5153 57.6415   4
   1  -1  41-41.6641 57.3557   2
  -1   1 -41 82.0197 64.0889   3
  -1  -1 -41 65.4679 61.4630   3
  -1  -1 -42 12.9663 56.1188   3
   1  -1  42 11.7432 51.2980   2
  -1   1 -42 50.1606 62.2134   4
  -1   1 -42 127.806 60.9739   3
   1   1  42 49.3785 58.9239   1
   1  -1  42 32.7248 62.8914   1
   1   1  42-81.4208 69.8461   2
  -1  -1 -42 26.2607 59.0537   4
  -1   1 -43 120.827 61.4642   4
   1  -1  43-46.2507 73.3220   1
   1   1  43-55.5278 62.7821   1
   1  -1  43-94.7997 66.6142   2
  -1  -1 -43 29.8442 58.4340   4
  -1  -1 -43 60.5523 67.2220   3
  -1   1 -43 162.625 71.7533   3
   1   1  43-52.7565 61.4768   2
  -1  -1 -44 108.411 68.2745   4
  -1   1 -44 43.7044 63.2709   3
   1  -1  44-35.0534 69.7019   1
   1   1  44-25.2269 75.1755   2
  -1   1 -44 37.3093 61.5557   4
   1  -1  44 81.5420 72.6753   2
   1   1  44-5.61688 62.4700   1
  -1  -1 -44 20.6238 56.7528   3
  -1   1 -45 74.5579 64.8869   4
  -1  -1 -45 125.021 73.0115   4
   1  -1  45 11.5863 78.2433   1
   1  -1  45-55.7835 56.5090   2
  -1   1 -45 69.0955 65.0407   3
  -1  -1 -45-27.5847 59.2967   3
   1   1  45 64.6633 68.2107   1
   1   1  45-11.9660 68.8701   2
   1   1  46 178.536 78.6949   2
  -1   1 -46 54.3035 58.6611   3
  -1   1 -46-11.9585 60.0594   4
  -1  -1 -46 70.5516 63.2897   4
   1   1  46 44.8493 62.4348   1
  -1  -1 -46 119.596 73.6916   3
   1  -1  46 148.364 80.5532   1
   1  -1  46 169.387 79.2128   2
  -1  -1 -47 38.5288 62.4890   3
  -1   1 -47 93.5131 65.4614   4
   1   1  47 90.6279 79.6141   2
   1  -1  47 101.635 70.3868   2
  -1  -1 -47 13.0679 62.1866   4
  -1   1 -47 50.4489 57.3538   3
   1   1  47 59.8302 71.0825   1
   1  -1  47-14.2069 76.3229   1
  -1   1 -48 83.9306 70.6820   3
  -1  -1 -48 70.2789 66.1313   4
   1  -1  48 81.3411 67.4646   2
   1   1  48-37.7629 76.2302   2
  -1  -1 -48-174.957 78.9277   3
   1   1  48 102.168 76.3729   1
   1  -1  48-23.2392 71.3902   1
  -1   1 -48 81.7298 68.3056   4
  -1   1 -49 37.4492 69.2021   3
  -1   1 -49 20.5132 62.9612   4
  -1  -1 -49-108.102 75.5669   3
   1   1  49 91.3501 79.3611   1
   1   1  49-2.63264 69.5406   2
   1  -1  49-3.71999 72.3857   1
  -1  -1 -49-19.5127 63.3334   4
   1   1  50-79.8663 75.9787   2
  -1   1 -50 67.8856 70.8086   4
  -1  -1 -50-1.95685 61.9086   3
   1   1  50 150.691 75.9764   1
  -1   1 -50-44.4642 62.8115   3
   1  -1  50 27.3228 71.8220   1
  -1  -1 -50 25.4720 63.0799   4
  -1  -1 -51-54.8033 68.5641   4
   1   1  51-42.5587 72.2052   1
  -1   1 -51 78.5434 81.9717   3
  -1   1 -51 92.9660 70.7823   4
   1  -1  51 86.8373 91.2254   1
  -1  -1 -51 29.2869 71.3059   3
   1   1  51 70.8816 80.0434   2
  -1  -1 -52 51.1561 68.9776   3
  -1   1 -52 103.358 81.1284   4
   1   1  52 134.153 83.6995   1
   1   1  52 51.2928 85.2945   2
   1  -1  52 8.69584 77.6165   1
  -1  -1 -52-17.8670 65.9939   4
   1  -1  53 113.242 85.4905   1
  -1   1 -53 29.3684 66.0060   4
   1   1  53-10.0990 78.7266   2
  -1  -1 -53 178.059 93.5055   4
  -1   1 -54-114.516 84.5311   4
   1  -1  54 99.4134 86.3304   1
   1   1  54 159.189 100.792   2
  -1  -1 -54 97.8287 78.6543   4
   1  -1  55 94.5831 96.9865   1
   1   1  55-145.262 96.3972   2
  -1   1 -55 55.8696 81.7030   4
  -1  -1 -55-14.6931 72.4914   4
   1   1  56 56.0914 88.7310   2
  -1   1 -56 248.564 97.1510   4
   1  -1  56 27.2219 85.3406   1
  -1  -1 -56 272.700 102.650   4
   1  -1  57 3.31153 92.5735   1
  -1  -1 -57 61.8576 75.8027   4
  -1   1 -57-47.3640 79.9863   4
   1   1  57 162.620 108.059   2
  -1  -1 -58-46.2164 84.4707   4
  -1   1 -58 24.8170 74.9118   4
   1   1  58 202.249 111.878   2
  -1   2  56 468.765 139.774   2
   1   2 -56 122.533 92.3492   3
  -1  -2  56 205.643 107.589   1
   1  -2 -56 148.288 102.424   3
   1   2 -55 854.278 154.023   3
  -1   2  55 1054.48 176.520   2
   1  -2 -55 1021.63 171.290   3
  -1  -2  55 939.199 163.595   1
  -1  -2  54 183.933 96.8047   1
   1   2 -54 187.215 95.6014   3
   1  -2 -54 96.9135 96.5584   3
  -1   2  54 412.063 124.255   2
  -1   2  53 163.026 95.5753   2
  -1  -2  53 1.16965 78.9248   1
   1  -2 -53 8.69991 82.0293   3
   1   2 -53-33.7621 77.1007   3
  -1  -2  52-20.3197 79.0190   1
  -1   2  52 88.7043 96.8346   2
   1   2 -52-87.0795 80.0020   3
   1  -2 -52-0.33670 78.9254   3
  -1   2  51 47.5998 87.5654   2
  -1  -2  51 203.542 95.3907   1
   1  -2 -51 23.1958 77.5191   3
   1   2 -51 39.0983 74.6778   3
  -1  -2  50 193.622 100.206   1
  -1   2  50-33.9646 85.8432   2
   1  -2 -50-26.6687 73.5705   3
   1   2 -50 209.338 90.2015   3
   1  -2 -49-94.8730 78.8190   3
  -1   2  49-62.0703 88.5791   2
   1   2 -49 68.3018 78.2345   3
  -1  -2  48-5.60024 70.7938   1
   1  -2 -48 14.0501 74.4104   3
  -1   2  48 154.214 98.8901   2
   1   2 -48 101.068 79.5762   3
   1   2 -47 17.9337 71.8890   3
   1  -2 -47 52.0450 74.9428   3
  -1  -2  47-37.2693 68.1940   2
  -1  -2  47 130.334 85.9939   1
   1   2 -47-40.1995 52.1407   4
  -1   2  47-36.8261 76.8271   2
  -1  -2  46 81.2030 73.7628   2
  -1   2  46 52.0902 81.9548   2
   1   2 -46-40.1562 54.3896   4
   1  -2 -46-75.4796 70.4562   3
  -1  -2  46 154.127 85.4658   1
   1   2 -46 66.2457 66.8976   3
  -1  -2  45-4.28755 70.2415   1
   1  -2 -45 5.11815 49.5784   4
   1  -2 -45 68.8012 71.9930   3
   1   2 -45-25.9558 45.4725   4
   1   2 -45 115.208 70.3357   3
  -1  -2  45 16.0822 59.5844   2
  -1   2  45-57.8039 68.8879   2
   1  -2 -44 44.8277 67.2901   3
  -1  -2  44 175.644 73.0370   2
  -1  -2  44 78.1904 79.1513   1
   1   2 -44 5.65177 46.3933   4
   1  -2 -44 120.771 66.1357   4
   1   2 -44 3.20472 67.9668   3
  -1   2  44 166.334 88.3270   2
   1  -2 -43-0.17973 65.4429   3
   1  -2 -43-10.9262 46.8584   4
   1   2 -43-80.0028 74.8024   3
  -1  -2  43 94.5581 66.9442   2
  -1   2  43 34.2018 78.2380   2
  -1  -2  43 92.8676 82.1675   1
   1   2 -43 97.9454 57.3375   4
   1   2 -42 173.835 62.6945   4
  -1  -2  42-6.64052 58.9293   2
   1  -2 -42 30.8354 53.0528   4
   1  -2 -42 58.1638 72.6554   3
  -1   2  42 78.0895 75.4842   2
  -1  -2  42 129.810 74.8049   1
   1   2 -42-42.2323 66.2604   3
   1  -2 -41 51.6359 52.2205   4
  -1   2  41-86.3583 72.2351   2
   1   2 -41 56.0156 47.9797   4
   1   2 -41-1.51085 57.2105   3
  -1   2  41 37.0681 48.5103   1
   1  -2 -41-103.990 63.1319   3
  -1  -2  41 23.4433 60.0808   1
  -1  -2  41 11.2795 53.3487   2
   1  -2 -40 126.864 71.1128   3
  -1  -2  40 167.874 77.7321   1
   1   2 -40 113.281 56.7115   4
   1   2 -40 156.315 70.5205   3
  -1   2  40 30.8764 42.7293   1
  -1   2  40 120.410 72.7279   2
  -1  -2  40 237.087 70.0331   2
   1  -2 -40 110.730 53.5730   4
  -1   2  39 130.507 75.3207   2
   1  -2 -39-31.7816 47.6507   4
   1   2 -39 65.2885 46.2158   4
  -1   2  39-7.45476 44.9605   1
   1  -2 -39 48.1598 69.0818   3
  -1  -2  39 82.5334 62.5016   1
   1   2 -39 3.38129 62.4200   3
  -1  -2  39 83.5029 58.3731   2
   1  -2 -38 363.982 91.9308   3
  -1   2  38 308.542 64.2498   1
   1  -2 -38 278.949 68.5792   4
  -1  -2  38 302.070 72.2221   2
   1   2 -38 264.358 60.4382   4
  -1   2  38 321.717 92.0187   2
  -1  -2  38 391.956 93.0771   1
   1   2 -38 302.042 79.1534   3
   1  -2 -37 1850.75 134.314   4
   1  -2 -37 1672.53 160.166   3
  -1  -2  37 1898.15 164.343   1
   1   2 -37 2000.24 164.878   3
  -1   2  37 2167.15 180.901   2
  -1   2  37 1759.64 124.329   1
   1   2 -37 2043.99 136.284   4
  -1  -2  37 2428.79 158.423   2
   1   2 -36 355.358 66.7436   4
  -1  -2  36 241.617 76.4426   1
  -1   2  36 256.658 56.1725   1
  -1  -2  36 303.091 65.7280   2
   1  -2 -36 365.309 70.7927   4
   1  -2 -36 499.547 99.1377   3
   1   2 -36 239.175 72.3229   3
  -1   2  36 362.166 86.9999   2
  -1   2  35 1061.26 125.262   2
   1   2 -35 974.065 118.088   3
  -1  -2  35 949.069 118.039   1
   1  -2 -35 1283.17 139.048   3
  -1   2  35 987.532 91.6016   1
  -1  -2  35 1122.87 106.833   2
   1   2 -35 980.232 96.1096   4
   1  -2 -35 890.747 96.4762   4
   1   2 -34 314.753 78.4737   3
   1   2 -34 341.105 62.8791   4
   1  -2 -34 362.161 82.5042   3
   1  -2 -34 312.644 61.4436   4
  -1   2  34 361.431 59.6920   1
  -1  -2  34 392.903 86.2561   1
  -1   2  34 345.534 89.1839   2
  -1  -2  34 406.091 72.0555   2
  -1  -2  33 708.334 89.8720   2
  -1  -2  33 563.866 93.0289   1
  -1   2  33 479.029 65.7586   1
   1  -2 -33 569.669 98.6818   3
   1   2 -33 617.859 92.2314   3
   1   2 -33 502.697 70.9276   4
  -1   2  33 714.915 107.954   2
   1  -2 -33 581.654 75.9690   4
   1  -2 -32 425.314 86.0000   3
  -1  -2  32 485.608 72.5389   2
   1   2 -32 538.276 91.2310   3
   1   2 -32 378.615 59.6889   4
  -1   2  32 399.968 86.2122   2
  -1   2  32 444.533 62.7520   1
   1  -2 -32 354.151 64.8980   4
  -1  -2  32 388.469 82.9132   1
  -1   2  31 240.812 70.7401   2
   1   2 -31 244.960 51.5555   4
   1  -2 -31 209.130 69.0939   3
   1  -2 -31 282.868 57.6492   4
  -1  -2  31 236.042 69.7168   1
  -1   2  31 301.856 52.9119   1
   1   2 -31 182.586 63.0819   3
  -1  -2  31 294.370 60.2680   2
   1  -2 -30 211.769 63.5840   3
  -1   2  30 317.004 52.4410   1
   1   2 -30 266.450 68.5490   3
  -1   2  30 371.757 76.6778   2
  -1  -2  30 342.230 62.2725   2
   1   2 -30 362.029 58.1807   4
   1  -2 -30 405.395 64.6361   4
  -1  -2  30 321.064 70.0934   1
   1  -2 -29 895.970 84.0565   4
  -1   2  29 847.950 74.4501   1
  -1   2  29 1094.81 114.337   2
   1   2 -29 907.702 106.894   3
   1   2 -29 854.108 82.1088   4
   1  -2 -29 855.091 110.231   3
  -1  -2  29 862.604 100.350   1
  -1  -2  29 1001.97 93.0212   2
  -1   2  28 324.472 48.3910   1
   1   2 -28 341.796 71.5919   3
   1  -2 -28 185.854 64.8421   3
  -1  -2  28 256.023 66.0887   1
   1   2 -28 357.011 57.2722   4
  -1   2  28 311.355 75.5871   2
   1  -2 -28 242.611 50.5649   4
  -1  -2  28 384.776 63.0602   2
  -1  -2  27 351.632 73.1613   1
  -1   2  27 321.981 48.9287   1
   1   2 -27 369.834 56.4702   4
  -1  -2  27 359.310 58.5073   2
   1   2 -27 377.783 74.7598   3
   1  -2 -27 316.249 54.0962   4
   1  -2 -27 205.869 60.9590   3
  -1   2  27 268.572 66.3795   2
  -1   2  26 163.781 37.2766   1
   1   2 -26 155.948 54.7977   3
  -1  -2  26 165.137 44.1085   2
   1   2 -26 116.398 42.9059   4
   1  -2 -26 122.560 40.5003   4
  -1  -2  26 59.8840 46.4361   1
   1  -2 -26 145.859 56.8746   3
  -1   2  26 132.609 56.3504   2
   1   2 -25 269.135 64.0398   3
  -1   2  25 255.177 63.1845   2
   1  -2 -25 224.436 43.6072   4
  -1   2  25 241.361 40.5411   1
  -1  -2  25 300.932 52.0181   2
   1  -2 -25 142.392 60.3621   3
   1   2 -25 360.613 53.1730   4
  -1  -2  25 266.098 63.0814   1
   1  -2 -24 57.9721 50.1200   3
   1  -2 -24 65.6567 36.9147   4
  -1  -2  24 81.2429 40.3127   1
  -1   2  24 50.3257 45.5323   2
  -1   2  24 67.8861 30.7433   1
   1   2 -24 16.9517 40.0915   3
   1   2 -24 25.3600 31.1802   4
  -1  -2  24 56.5300 37.4445   2
   1  -2 -23 68.3740 33.0160   4
  -1   2  23 81.4272 28.0132   1
  -1   2  23 135.563 52.1480   2
   1   2 -23 117.820 32.9595   4
   1   2 -23 145.280 50.4270   3
  -1  -2  23 83.1150 36.7244   2
  -1  -2  23 79.0018 42.5994   1
   1  -2 -23 67.4475 51.8052   3
   1   2 -22 91.5751 42.0361   3
   1   2 -22 129.443 36.3148   4
   1  -2 -22 155.039 39.8796   4
   1  -2 -22 96.5235 53.8570   3
  -1   2  22 143.046 50.8354   2
  -1   2  22 125.517 27.3188   1
  -1  -2  22 121.629 41.4588   2
  -1  -2  22 107.343 50.1812   1
   1  -2 -21 15.8730 46.3950   3
   1   2 -21 86.6489 34.8537   4
   1  -2 -21 35.4972 32.0863   4
  -1   2  21 101.870 49.5984   2
   1   2 -21 17.5797 37.2504   3
  -1  -2  21 65.6100 29.0015   2
  -1   2  21 29.8892 23.6487   1
  -1  -2  21 35.8198 45.8630   1
  -1   2  20-10.2841 39.8063   2
  -1   2  20 35.3992 25.4937   1
   1   2 -20-54.2826 30.9787   4
   1   2 -20-5.56084 39.7299   3
  -1  -2  20 42.3608 33.1867   2
   1  -2 -20 69.1493 34.8433   4
   1  -2 -20 7.78206 45.8641   3
  -1  -2  20 10.0977 39.2152   1
   1   2 -19 232.489 42.3809   4
   1   2 -19 247.299 57.3355   3
   1  -2 -19 145.913 59.2797   3
  -1  -2  19 196.741 49.5621   1
  -1   2  19 207.312 31.2966   1
   1  -2 -19 258.709 43.6273   4
  -1   2  19 161.886 52.0697   2
  -1  -2  19 250.503 44.7926   2
  -1  -2  18 5.83261 30.6493   2
   1  -2 -18 24.6682 27.5953   4
  -1   2  18 154.095 50.3549   2
   1   2 -18 70.6190 47.0734   3
   1  -2 -18 73.3648 45.1604   3
  -1   2  18 42.9100 20.2686   1
   1   2 -18 52.2483 33.9142   4
  -1  -2  18 52.4673 39.7534   1
  -1   2  17 2026.23 119.062   2
   1  -2 -17 1871.71 126.703   3
   1  -2 -17 2249.81 97.8971   4
  -1   2  17 2365.13 77.1225   1
   1   2 -17 2315.95 128.449   3
  -1  -2  17 2063.83 116.868   1
   1   2 -17 2179.80 99.7604   4
  -1  -2  17 2137.39 97.5072   2
  -1   2  16 1677.18 108.156   2
  -1   2  16 1978.22 67.9455   1
   1   2 -16 1725.28 87.3996   4
  -1  -2  16 1838.14 87.5469   2
   1  -2 -16 1699.73 84.5600   4
   1   2 -16 1862.47 114.014   3
   1  -2 -16 1598.41 59.6524   1
  -1  -2  16 1703.97 106.566   1
   1  -2 -16 1771.97 116.321   3
   1  -2 -15 721.400 41.2302   1
  -1  -2  15 749.449 58.6724   2
   1  -2 -15 696.264 79.4128   3
   1  -2 -15 764.976 58.7719   4
  -1   2  15 782.819 75.4221   2
  -1   2  15 835.386 43.1450   1
   1   2 -15 714.492 76.7955   3
  -1  -2  15 746.855 74.4083   1
   1   2 -15 747.953 58.3264   4
  -1  -2  14 747.454 57.8060   2
   1   2 -14 939.580 82.4795   3
   1  -2 -14 834.723 42.7120   1
  -1   2  14 851.708 77.0353   2
  -1  -2  14 860.382 78.0867   1
   1  -2 -14 653.484 86.5554   3
   1   2 -14 834.989 62.1627   4
  -1   2  14 903.658 44.3605   1
   1  -2 -14 865.162 60.7465   4
  -1  -2  13 143.174 45.7300   1
  -1   2  13 119.420 20.3876   1
   1  -2 -13 115.320 32.6266   4
   1  -2 -13 132.416 51.3319   3
   1   2 -13 72.3798 39.4609   3
   1   2 -13 105.608 31.0364   4
   1  -2 -13 131.733 20.9749   1
  -1  -2  13 113.128 31.7836   2
  -1   2  13 125.124 50.2082   2
  -1  -2  12 623.170 65.4393   1
   1  -2 -12 675.175 55.0061   4
  -1   2  12 727.899 35.7703   1
   1   2 -12 599.940 64.8210   3
  -1   2  12 701.486 64.9406   2
   1   2 -12 745.509 57.7750   4
  -1  -2  12 648.948 53.2347   2
   1  -2 -12 571.337 32.3014   1
   1  -2 -12 506.781 72.1051   3
  -1  -2  11 113.566 36.9965   1
  -1   2  11 139.626 18.9877   1
   1  -2 -11 114.626 31.8680   4
   1   2 -11 156.067 45.9789   3
   1   2 -11 137.655 33.6628   4
  -1   2  11 218.836 47.1535   2
   1  -2 -11 134.841 17.7169   1
   1   2 -10 248.070 37.3926   2
  -1  -2  10 206.619 43.9891   1
  -1   2  10 177.841 40.3248   3
   1  -2 -10 231.734 20.0873   1
  -1   2  10 283.120 48.6689   2
   1  -2 -10 306.325 39.7934   4
  -1   2  10 212.620 19.8303   1
   1   2 -10 272.565 51.7578   3
  -1  -2   9 532.885 60.9802   1
   1   2  -9 633.309 65.8955   3
   1  -2  -9 580.132 26.3572   1
   1  -2  -9 599.205 50.9659   4
  -1   2   9 581.978 57.4739   2
  -1  -2   9 612.176 59.2155   4
  -1   2   9 572.299 63.2160   3
   1   2  -9 527.842 46.0118   2
  -1   2   9 509.983 26.2493   1
  -1  -2   8 548.827 55.8491   1
   1  -2  -8 499.873 45.8376   4
  -1  -2   8 505.589 54.0528   4
  -1   2   8 385.328 21.4929   1
   1  -2  -8 424.130 21.5419   1
   1   2  -8 456.997 45.9359   2
   1   2  -8 496.454 60.6085   3
  -1   2   8 382.535 47.4966   2
  -1   2   8 472.853 55.5932   3
  -1   2   7 177.664 43.8410   3
   1  -2  -7 145.593 32.2048   4
   1   2  -7 137.328 42.8482   3
   1   2  -7 121.565 33.7615   2
  -1   2   7 167.379 36.4961   2
  -1  -2   7 162.204 37.7936   1
  -1   2   7 132.777 15.0654   1
  -1  -2   7 156.450 39.2732   4
   1  -2  -7 135.975 15.7167   1
  -1   2   6 216.278 18.8307   1
  -1   2   6 266.529 46.1992   3
   1  -2  -6 244.698 37.7439   4
   1   2  -6 293.762 48.0560   3
  -1   2   6 277.198 42.0015   2
  -1  -2   6 198.721 38.3834   1
  -1  -2   6 320.612 46.0975   4
   1   2  -6 241.051 37.8588   2
   1  -2  -6 214.390 20.4624   1
   1  -2  -5 721.863 34.0959   1
   1  -2  -5 799.409 58.5122   4
  -1  -2   5 737.852 61.2335   1
   1   2  -5 740.972 57.8915   2
  -1  -2   5 744.924 60.5569   4
  -1   2   5 746.937 54.4229   2
  -1   2   5 751.181 32.6557   1
   1   2  -5 887.340 65.7255   3
  -1   2   5 872.398 65.0574   3
   1  -2  -4 15722.3 145.321   1
  -1  -2   4 15423.2 229.969   1
  -1   2   4 15673.4 216.612   2
  -1  -2   4 15668.3 235.301   4
   1   2  -4 15841.3 246.237   3
   1   2  -4 15109.3 223.672   2
   1  -2  -4 15544.2 223.592   4
  -1   2   4 15628.4 241.337   3
   1   2  -3 8419.89 168.512   2
  -1  -2   3 8819.62 171.840   1
   1  -2  -3 8882.41 113.887   1
  -1   2   3 8499.01 153.464   2
   1   2  -3 8555.73 181.410   3
   1  -2  -3 8464.01 166.049   4
  -1   2   3 8867.16 179.327   3
   1  -2  -3 8683.87 115.985   1
  -1  -2   3 8565.21 175.660   4
  -1   2   2 3921.20 118.544   3
  -1  -2   2 3951.61 121.425   4
  -1  -2   2 3929.11 115.714   1
  -1   2   2 3928.82 99.8311   2
   1  -2  -2 3858.72 117.274   4
   1  -2  -2 3866.79 80.8460   1
   1  -2  -2 4115.93 83.1448   1
   1   2  -2 3819.22 122.914   3
   1   2  -2 3818.49 114.794   2
   1  -2  -1 6631.47 156.344   4
   1   2  -1 6594.50 149.886   2
  -1   2   1 6653.11 121.273   2
  -1  -2   1 6607.88 145.284   1
  -1   2   1 6387.79 149.428   3
   1  -2  -1 6601.65 109.145   1
   1  -2  -1 6796.37 112.261   1
  -1  -2   1 6596.85 154.105   4
   1  -2  -1 6838.76 122.942   2
   1   2  -1 6315.92 155.531   3
   1   2   0 34460.4 344.960   2
  -1   2   0 34741.6 257.362   2
   1  -2   0 35268.5 257.997   1
   1  -2   0 34422.0 258.207   2
   1   2   0 34578.6 341.233   3
  -1  -2   0 34652.0 347.022   4
  -1   2   0 34770.7 335.149   3
  -1   2   0 34570.0 335.740   4
   1  -2   0 34742.3 267.030   1
  -1  -2   0 34571.1 319.433   1
   1   2   1 4530.83 125.828   3
  -1   2  -1 4422.14 126.056   4
   1  -2   1 4396.65 97.5799   1
  -1   2  -1 4337.87 121.803   3
   1  -2   1 4444.88 89.1644   2
   1   2   1 4694.35 129.625   2
  -1  -2  -1 4602.00 118.227   1
  -1  -2  -1 4764.98 135.188   4
  -1   2  -1 4285.37 88.0767   2
   1   2   2 34645.0 350.521   2
  -1   2  -2 35469.9 345.235   4
  -1   2  -2 35449.1 335.575   3
  -1  -2  -2 34375.7 313.376   1
   1  -2   2 35082.6 226.084   2
  -1  -2  -2 34900.1 354.475   4
   1  -2   2 35038.3 285.236   1
   1   2   2 33948.6 331.457   3
  -1   2  -2 34890.0 230.941   2
   1  -2   3 7261.88 137.263   1
   1   2   3 7472.90 166.682   2
  -1   2  -3 7639.91 159.071   3
  -1   2  -3 7212.08 99.5891   2
  -1   2  -3 7296.15 162.612   4
   1   2   3 7321.19 155.419   3
   1  -2   3 7302.08 98.1104   2
  -1  -2  -3 7596.55 145.702   1
  -1  -2  -3 7831.72 175.255   4
   1  -2   4 6618.81 87.7433   2
  -1   2  -4 7193.04 164.075   4
   1   2   4 6950.76 163.562   2
  -1   2  -4 7270.19 154.392   3
   1   2   4 6569.50 150.364   3
   1  -2   4 7160.30 142.955   1
  -1  -2  -4 7367.30 172.666   4
  -1  -2  -4 7188.60 139.987   1
  -1   2  -4 6691.45 91.7908   2
   1  -2   5 4925.76 70.6572   2
  -1  -2  -5 5858.59 126.822   1
   1  -2   5 5886.80 135.727   1
  -1  -2  -5 5975.07 157.752   4
   1  -2   5 4865.24 71.9830   2
   1   2   5 5820.29 155.808   2
  -1   2  -5 5826.08 150.906   4
  -1   2  -5 6141.65 144.733   3
   1   2   5 5636.82 137.572   3
  -1   2  -6 15041.0 244.277   4
  -1  -2  -6 15666.8 204.889   1
   1   2   6 14758.2 220.712   3
   1   2   6 15300.9 250.895   2
   1  -2   6 15079.2 224.415   1
  -1  -2  -6 15778.5 252.744   4
  -1   2  -6 16233.7 231.192   3
  -1  -2  -7 313.798 38.1167   1
  -1  -2  -7 372.496 54.8653   4
  -1   2  -7 351.470 47.6086   3
  -1   2  -7 268.961 45.3798   4
   1   2   7 344.967 45.7288   3
   1  -2   7 284.170 40.7990   1
   1   2   7 339.558 53.3940   2
  -1   2  -8 182.628 40.5294   4
   1   2   8 270.330 46.2956   2
  -1  -2  -8 246.735 33.6379   1
   1  -2   8 174.890 37.2375   1
  -1   2  -8 299.867 44.3163   3
   1   2   8 274.381 41.9930   3
  -1  -2  -8 266.075 47.9931   4
   1   2   9 103.885 29.7121   3
  -1  -2  -9 101.701 29.2731   1
   1   2   9 59.9146 38.0010   2
   1  -2   9 52.1953 30.8841   1
  -1  -2  -9 57.6767 35.9315   4
  -1   2  -9 70.1429 38.0594   4
  -1   2  -9 86.3399 31.9357   3
   1   2  10 348.468 45.9746   3
  -1  -2 -10 436.041 56.1054   4
  -1   2 -10 468.942 52.4326   3
   1   2  10 292.032 50.2518   2
   1  -2  10 370.436 20.7255   2
   1  -2  10 282.439 47.2802   1
  -1  -2 -10 374.835 40.1960   1
  -1   2 -10 323.726 21.0966   2
  -1   2 -10 365.308 52.9601   4
   1  -2  11 451.655 25.4039   2
  -1  -2 -11 394.772 41.9786   1
  -1   2 -11 516.435 54.7018   3
   1   2  11 449.934 59.7040   2
  -1   2 -11 315.307 49.2461   4
  -1  -2 -11 497.180 60.6733   4
  -1   2 -11 314.862 24.4031   2
   1   2  11 359.826 48.5801   3
   1  -2  11 439.058 56.6838   1
  -1   2 -12 806.470 40.5747   2
  -1   2 -12 1066.95 72.8360   3
   1   2  12 1048.68 82.7909   2
  -1   2 -12 831.631 73.0233   4
   1  -2  12 983.557 37.8067   2
   1  -2  12 929.084 73.4360   1
  -1  -2 -12 895.890 58.5500   1
   1   2  12 879.649 67.6300   3
  -1  -2 -12 954.107 77.2920   4
  -1   2 -13 316.844 51.0628   3
   1   2  13 261.427 45.7874   3
  -1   2 -13 276.408 51.3648   4
   1  -2  13 298.137 25.6432   2
  -1  -2 -13 245.950 48.3272   4
   1  -2  13 287.566 50.8804   1
  -1   2 -13 308.613 27.8392   2
   1   2  13 206.398 47.9385   2
  -1  -2 -13 186.672 33.9482   1
  -1   2 -14 805.608 68.6685   3
   1   2  14 711.968 72.7346   2
  -1   2 -14 806.188 43.2287   2
  -1   2 -14 681.872 70.6358   4
   1   2  14 691.906 64.4567   3
   1  -2  14 740.483 39.5482   2
  -1  -2 -14 685.485 52.8117   1
   1  -2  14 524.086 62.7334   1
  -1  -2 -14 757.518 72.2766   4
  -1   2 -15 535.298 60.4849   3
  -1   2 -15 286.707 33.6925   2
   1  -2  15 507.400 63.3844   1
   1   2  15 415.403 49.0587   1
   1   2  15 447.926 56.1655   3
  -1  -2 -15 472.392 65.0590   4
  -1   2 -15 449.809 58.2724   4
   1   2  15 397.941 58.2194   2
   1  -2  15 489.852 35.5636   2
   1   2  16 818.993 63.7497   1
   1   2  16 927.669 74.3294   3
  -1   2 -16 941.218 81.8372   4
   1  -2  16 965.509 50.8026   2
   1   2  16 894.733 83.8859   2
  -1   2 -16 831.795 45.9576   2
   1  -2  16 895.743 84.1637   1
  -1  -2 -16 862.489 79.7392   4
  -1   2 -16 1103.34 81.7938   3
   1  -2  17 19.8632 42.4018   1
  -1   2 -17 7.04089 34.4894   3
  -1   2 -17 31.5391 42.6668   4
  -1  -2 -17 12.6946 37.5887   4
   1  -2  17 44.7890 22.5951   2
  -1  -2 -17 30.6825 41.3048   3
   1   2  17 18.5571 39.6134   2
   1   2  17 10.8819 30.1786   1
   1   2  18-1.25588 41.1551   2
  -1  -2 -18 19.6593 41.3488   4
  -1   2 -18-19.5510 43.0770   4
  -1   2 -18 17.5175 37.5731   3
   1  -2  18-14.7983 22.8437   2
  -1  -2 -18 32.0376 38.6001   3
   1  -2  18-2.07821 38.7369   1
   1   2  18-24.2686 30.7049   1
  -1  -2 -19 65.8848 41.2639   3
  -1   2 -19 101.910 47.4131   4
   1  -2  19 24.8620 39.2025   1
   1   2  19 41.0307 41.5924   2
  -1   2 -19-11.3726 35.8947   3
   1   2  19 36.1850 28.7657   1
  -1  -2 -19-24.6797 42.8703   4
   1  -2  19 24.3322 24.4127   2
   1  -2  20 728.941 82.2340   1
  -1  -2 -20 1024.59 90.6445   3
  -1   2 -20 916.839 81.0501   3
  -1  -2 -20 857.906 86.4903   4
   1   2  20 1045.60 100.697   2
   1   2  20 731.650 64.3725   1
  -1   2 -20 881.809 87.4095   4
   1  -2  20 882.315 56.7576   2
  -1  -2 -21 327.856 63.3799   3
   1  -2  21 282.933 38.9753   2
   1   2  21 343.820 68.9382   2
   1  -2  21 231.290 53.3107   1
  -1   2 -21 344.519 62.2888   4
  -1  -2 -21 289.382 60.0815   4
   1   2  21 270.073 49.3432   1
  -1   2 -21 398.227 58.9993   3
  -1  -2 -22 333.813 63.5011   4
   1   2  22 211.818 45.1557   1
  -1  -2 -22 274.869 58.9242   3
   1  -2  22 195.392 52.5965   1
   1  -2  22 252.944 39.8156   2
  -1   2 -22 301.002 56.0358   3
  -1   2 -22 184.267 49.4998   4
   1   2  22 293.246 68.0333   2
   1   2  23 1.38239 32.9689   1
   1  -2  23 10.7654 43.9587   1
   1   2  23-36.9582 48.7028   2
   1  -2  23 95.7139 33.7983   2
  -1   2 -23 101.377 46.2126   3
  -1  -2 -23 66.7965 44.1119   4
  -1   2 -23 21.7206 40.5314   4
  -1  -2 -23 90.5863 48.5599   3
   1   2  24 319.562 71.7078   2
  -1   2 -24 478.035 70.0141   3
   1   2  24 393.098 56.0353   1
   1  -2  24 357.560 47.0286   2
   1  -2  24 255.777 62.9662   1
  -1   2 -24 365.152 69.2755   4
  -1  -2 -24 288.015 63.1915   3
  -1  -2 -24 284.389 60.8981   4
   1   2  25 1207.21 113.290   2
   1  -2  25 1117.39 75.4898   2
  -1   2 -25 1196.28 99.1677   3
  -1  -2 -25 1171.46 108.726   4
   1  -2  25 987.047 108.050   1
  -1  -2 -25 1124.78 104.049   3
  -1   2 -25 1130.89 104.069   4
   1   2  25 1109.29 87.9030   1
  -1  -2 -26 433.371 72.9900   4
   1  -2  26 422.003 79.5534   1
  -1   2 -26 400.936 70.7067   4
   1   2  26 391.961 77.4579   2
  -1   2 -26 419.809 66.0382   3
   1   2  26 254.663 51.4140   1
   1  -2  26 369.099 50.3605   2
  -1  -2 -26 347.401 70.9651   3
   1  -2  27 791.220 98.8606   1
  -1   2 -27 868.546 95.3008   4
  -1  -2 -27 901.827 96.3002   4
   1   2  27 746.744 95.0247   2
   1   2  27 826.491 81.0595   1
   1  -2  27 941.353 74.3704   2
  -1   2 -27 1249.40 107.279   3
  -1  -2 -27 749.185 90.9870   3
   1   2  28 69.1917 54.9581   2
  -1  -2 -28 111.793 56.6228   4
   1  -2  28 40.4680 51.7955   1
   1   2  28 98.2857 41.1407   1
   1  -2  28 60.8048 35.3456   2
  -1  -2 -28 88.3178 48.6177   3
  -1   2 -28 131.239 55.7244   4
  -1   2 -28 135.411 52.8312   3
  -1  -2 -29 308.467 66.0489   4
  -1  -2 -29 388.209 74.9671   3
   1   2  29 410.538 83.5616   2
   1  -2  29 352.752 53.1487   2
   1  -2  29 313.773 76.4286   1
  -1   2 -29 316.926 68.0610   4
  -1   2 -29 328.317 64.8600   3
   1   2  29 371.518 63.3262   1
   1   2  30 370.893 64.3507   1
  -1  -2 -30 384.117 69.8657   3
  -1   2 -30 446.795 74.9623   4
   1  -2  30 523.378 64.2815   2
  -1  -2 -30 489.284 80.1222   4
  -1   2 -30 535.498 77.5307   3
   1   2  30 484.573 87.1127   2
   1  -2  30 495.837 91.0114   1
   1  -2  31 402.885 88.6038   1
  -1  -2 -31 433.330 80.4831   4
  -1   2 -31 420.481 75.0329   4
   1  -2  31 316.763 56.2613   2
  -1  -2 -31 298.024 71.2478   3
  -1   2 -31 344.952 66.5975   3
   1   2  31 388.722 64.8639   1
   1   2  31 431.567 86.7430   2
  -1   2 -32 819.426 101.695   4
  -1  -2 -32 832.562 101.434   3
   1  -2  32 1006.51 86.2871   2
   1  -2  32 937.019 118.790   1
  -1   2 -32 826.141 95.8367   3
   1   2  32 908.988 94.3214   1
   1   2  32 978.500 118.696   2
  -1  -2 -32 886.600 104.116   4
  -1   2 -33 1839.54 145.411   4
   1   2  33 1758.69 131.414   1
   1  -2  33 1815.17 161.825   1
   1   2  33 1698.60 153.328   2
  -1  -2 -33 1730.98 142.620   4
   1  -2  33 1735.19 113.847   2
  -1   2 -33 1795.16 136.673   3
  -1  -2 -33 1638.85 135.629   3
   1  -2  34 337.496 61.1249   2
   1   2  34 455.745 77.0127   1
  -1  -2 -34 556.765 95.1086   4
   1  -2  34 478.750 101.030   1
  -1   2 -34 430.060 81.7816   4
  -1  -2 -34 318.853 73.7458   3
   1   2  34 421.706 90.7065   2
  -1   2 -34 442.927 78.0847   3
  -1  -2 -35 181.417 62.5075   3
  -1   2 -35 383.005 76.4972   4
  -1   2 -35 308.355 73.9609   3
   1   2  35 274.407 89.2860   2
   1   2  35 275.152 66.7815   1
   1  -2  35 199.272 53.1213   2
   1  -2  35 276.984 85.8144   1
  -1  -2 -35 262.044 74.3079   4
   1  -2  36 126.289 50.8365   2
  -1   2 -36 159.674 63.7646   4
  -1  -2 -36 203.801 67.5355   3
   1   2  36 49.9477 52.8096   1
   1  -2  36 127.505 71.6265   1
   1   2  36 67.9504 63.4011   2
  -1  -2 -36 40.5812 56.5666   4
  -1   2 -36 191.467 61.8852   3
   1   2  37 304.668 77.2545   1
  -1   2 -37 352.083 78.8894   4
  -1   2 -37 468.187 85.7485   3
   1  -2  37 277.213 63.2747   2
  -1  -2 -37 311.385 76.3662   3
   1   2  37 231.636 81.7804   2
   1  -2  37 325.996 90.8029   1
  -1  -2 -37 305.215 80.5306   4
  -1   2 -38 74.9893 48.8565   3
  -1  -2 -38 234.410 75.6195   4
   1  -2  38 34.7397 59.8200   1
   1  -2  38 151.462 52.4604   2
   1   2  38 105.527 60.5133   1
  -1  -2 -38 78.2523 54.6154   3
   1   2  38 175.253 67.7768   2
  -1   2 -38 104.870 56.7263   4
   1  -2  39 137.081 71.4062   1
   1   2  39 50.9431 55.0032   1
  -1  -2 -39 5.71474 53.6550   4
   1   2  39 99.5815 74.3267   2
  -1   2 -39 105.911 67.2809   3
  -1  -2 -39 28.0353 57.3366   3
   1  -2  39-23.6203 47.9831   2
  -1   2 -39 77.0863 57.6602   4
  -1  -2 -40 55.6004 65.3273   4
   1   2  40-23.4180 70.0834   2
   1   2  40 64.4376 62.0660   1
  -1  -2 -40 65.7188 55.7538   3
   1  -2  40 16.4935 54.1672   2
   1  -2  40-18.6795 65.8422   1
  -1   2 -40 163.732 67.0497   3
  -1   2 -40 177.263 64.6089   4
  -1   2 -41-80.0465 72.2764   4
  -1   2 -41-8.80638 51.9355   3
   1  -2  41 60.3523 74.0315   1
  -1  -2 -41 147.995 75.7742   4
   1   2  41 54.9367 70.7714   2
   1   2  41 27.2051 53.0938   1
  -1  -2 -41-72.1204 61.0094   3
   1  -2  42 127.451 85.4527   1
   1   2  42 163.083 76.2447   2
  -1  -2 -42 105.782 66.3159   3
  -1   2 -42-104.293 60.5693   3
  -1   2 -42 88.5564 57.2930   4
  -1  -2 -42-3.87768 58.9438   4
   1   2  42-165.253 78.3153   1
  -1   2 -43 101.216 65.0049   4
   1  -2  43-44.6304 73.9313   1
  -1   2 -43 27.4829 55.2914   3
  -1  -2 -43-40.3003 58.7265   4
   1   2  43 89.7242 78.4052   2
  -1  -2 -43 91.3803 66.5286   3
   1   2  43 3.78888 54.6494   1
  -1   2 -44 21.0553 65.0466   3
   1   2  44-112.684 90.7451   2
  -1  -2 -44-23.7070 70.0615   4
   1  -2  44-2.59293 73.8633   1
   1   2  44 175.632 69.5462   1
  -1  -2 -44 70.5834 61.8453   3
  -1   2 -44 70.3520 68.1708   4
  -1   2 -45 433.817 95.0099   3
   1  -2  45 406.806 111.413   1
  -1  -2 -45 329.940 88.7789   3
   1   2  45 362.069 88.9407   1
   1   2  45 436.743 110.680   2
  -1   2 -45 347.157 89.0175   4
  -1  -2 -45 472.522 100.801   4
  -1  -2 -46-52.3285 75.1403   3
  -1   2 -46 56.6842 69.6456   4
   1   2  46 70.8627 89.4365   2
   1  -2  46 143.526 82.1335   1
  -1   2 -46 87.9036 66.0947   3
  -1  -2 -46-23.6149 66.2329   4
  -1   2 -47 7.87855 58.5390   4
  -1  -2 -47 201.066 88.5556   3
  -1  -2 -47 50.5775 70.3979   4
   1  -2  47-11.6520 73.4728   1
   1   2  47 37.2109 81.4266   2
  -1   2 -47-65.6343 65.1933   3
   1   2  48 42.5346 74.7219   2
  -1   2 -48 31.0087 63.3952   4
   1  -2  48 11.9707 83.1497   1
  -1  -2 -48 155.282 77.5601   3
  -1  -2 -48-82.1624 72.0827   4
  -1   2 -48-0.83436 59.3288   3
  -1  -2 -49 219.499 89.7376   4
   1  -2  49 27.3331 76.4429   1
  -1   2 -49 190.743 81.4403   4
   1   2  49-50.5736 91.6224   2
  -1  -2 -49 21.8481 67.2782   3
  -1   2 -49 103.749 79.5289   3
  -1   2 -50-19.5617 66.6365   4
  -1  -2 -50 49.3026 72.1630   4
  -1   2 -50 119.767 76.6970   3
  -1  -2 -50-52.3060 78.5001   3
   1  -2  50 60.0318 86.8251   1
   1   2  50 53.7550 89.7748   2
  -1   2 -51 182.850 84.4647   4
   1   2  51 428.970 118.414   2
  -1  -2 -51 130.977 83.5881   4
  -1   2 -51 193.824 83.6683   3
   1  -2  51 236.442 101.936   1
  -1  -2 -51 102.751 78.7656   3
   1  -2  52 244.381 104.784   1
  -1  -2 -52 24.1613 71.0703   3
  -1   2 -52 125.438 79.8358   4
  -1  -2 -52 66.2332 73.4476   4
   1   2  52 99.6283 92.6225   2
   1  -2  53 310.970 116.130   1
  -1   2 -53 360.806 109.920   4
   1   2  53 213.330 99.7205   2
  -1  -2 -53 199.029 95.0690   4
   1   2  54-21.7543 87.6133   2
  -1   2 -54-26.8052 69.9980   4
  -1  -2 -54 163.666 89.1215   4
   1  -2  54 134.044 90.7165   1
  -1   2 -55 223.985 93.9066   4
   1  -2  55 208.611 117.473   1
  -1  -2 -55 131.924 90.8305   4
   1   2  55 48.8320 93.8630   2
  -1   2 -56-4.81126 77.1061   4
   1   2  56-119.286 101.659   2
  -1  -2 -56-187.292 103.696   4
  -1   2 -57 28.2186 80.2697   4
  -1  -2 -57-81.9278 92.8273   4
   1   3 -55-28.1216 86.0916   3
   1   3 -54 686.918 146.759   3
   1  -3 -54 431.714 130.211   3
  -1  -3  54 613.764 140.206   1
  -1   3  54 647.157 154.133   2
  -1  -3  53 273.975 113.920   1
  -1   3  53 244.528 113.328   2
   1  -3 -53 81.5181 91.3123   3
   1   3 -53-84.0503 81.4777   3
  -1  -3  52-28.6730 86.8739   1
   1  -3 -52 18.5477 86.4653   3
  -1   3  52 96.9693 96.6891   2
   1   3 -52 97.8314 84.8431   3
   1  -3 -51-20.9197 88.3047   3
   1   3 -51-108.498 81.0555   3
  -1   3  51 7.32071 85.3794   2
  -1  -3  51 83.5453 93.1273   1
  -1  -3  50 186.735 91.6254   1
   1   3 -50-12.4886 78.3396   3
   1  -3 -50 31.5974 84.5366   3
  -1   3  50 18.7134 83.3983   2
  -1  -3  49 116.658 86.9181   1
   1  -3 -49-48.6360 79.0746   3
   1   3 -49 121.269 77.9980   3
  -1   3  49 24.4023 86.4256   2
  -1   3  48-5.94265 80.1531   2
   1  -3 -48 3.58411 75.1085   3
   1   3 -48-131.738 88.0666   3
  -1  -3  48-62.0372 83.4114   1
  -1  -3  47 28.7079 72.6169   1
   1  -3 -47-12.3995 70.3723   3
   1   3 -47-45.1145 74.5075   3
  -1   3  47-102.455 82.0744   2
   1   3 -47-3.29976 63.6739   4
   1  -3 -46-24.4247 70.6263   3
   1   3 -46 66.9755 75.0225   3
  -1  -3  46 34.2545 79.8556   1
   1   3 -46 100.203 61.2338   4
  -1   3  46 15.0987 87.8743   2
  -1   3  45-88.2259 95.4645   2
  -1  -3  45-155.982 100.893   1
   1  -3 -45-77.6843 74.4812   3
   1   3 -45 76.6410 60.8326   4
   1   3 -45 83.4897 70.7969   3
   1   3 -44 40.4250 54.3381   4
   1  -3 -44 127.962 82.7818   3
   1  -3 -44-65.5969 66.4186   4
  -1   3  44 126.629 83.7946   2
  -1  -3  44-77.3704 73.9124   1
   1   3 -44 204.213 92.0610   3
  -1  -3  43 20.6915 72.0776   1
   1  -3 -43 62.5696 57.9432   4
   1   3 -43 34.1967 64.9350   3
   1   3 -43 34.3360 52.6942   4
   1  -3 -43-34.5906 72.4793   3
  -1   3  43 11.1978 72.8164   2
  -1  -3  42-60.3352 83.3133   1
   1  -3 -42 61.1036 76.5349   3
   1  -3 -42-47.3956 53.2778   4
  -1   3  42-66.3152 74.7090   2
   1   3 -42 20.0752 61.6583   3
   1   3 -42 6.70914 46.9904   4
   1   3 -41 49.3012 44.7090   4
   1  -3 -41 147.070 80.8183   3
   1   3 -41-46.6164 78.6449   3
   1  -3 -41-24.4655 52.8300   4
  -1   3  41 30.8995 67.1295   2
  -1  -3  41 5.05136 61.4979   1
   1  -3 -40-2.62462 53.7339   4
   1   3 -40 19.0099 45.2533   4
   1   3 -40-39.0693 65.5946   3
  -1   3  40 34.4248 67.0355   2
  -1  -3  40 33.8088 65.3720   1
   1  -3 -40-69.2056 79.8166   3
  -1  -3  39-25.5511 63.1899   1
  -1  -3  39-4.03402 51.7711   2
  -1   3  39 46.2570 71.9335   2
   1  -3 -39 31.0282 53.8205   4
   1  -3 -39-31.0342 68.4202   3
   1   3 -39 87.0678 72.3753   3
   1   3 -39-53.4488 52.6986   4
   1  -3 -38 149.791 87.0555   3
  -1   3  38 22.5785 66.5734   2
  -1  -3  38-38.2641 55.5427   2
   1   3 -38 1.40142 47.7377   4
   1   3 -38 98.0419 65.7730   3
   1  -3 -38-55.6662 53.8260   4
  -1  -3  38 86.2241 75.5190   1
  -1  -3  37-84.6959 58.1909   2
  -1   3  37-82.3061 70.9493   2
   1   3 -37-29.7296 56.6518   3
   1  -3 -37 85.0680 54.4333   4
   1  -3 -37 174.148 83.2621   3
   1   3 -37 41.3662 52.4015   4
  -1  -3  37-53.1715 64.2039   1
  -1  -3  36 307.272 65.2918   2
  -1   3  36 430.783 100.504   2
   1   3 -36 164.399 58.0275   4
   1  -3 -36 322.695 75.2458   4
   1  -3 -36 381.136 98.7076   3
   1   3 -36 388.898 90.7137   3
  -1  -3  36 299.307 91.1096   1
   1   3 -35-56.7812 49.4619   4
  -1  -3  35 56.5937 46.1846   2
   1  -3 -35 43.9906 61.5410   3
   1   3 -35-20.0116 54.8987   3
  -1   3  35-12.8647 60.7550   2
   1  -3 -35-39.0250 48.9543   4
  -1  -3  35 57.8818 56.6677   1
  -1  -3  34 163.899 52.8429   2
   1   3 -34 147.459 57.7868   4
   1  -3 -34 31.3074 47.3939   4
   1   3 -34 60.5016 57.5757   3
   1  -3 -34 64.4351 68.6081   3
  -1   3  34 40.0954 56.5680   2
  -1  -3  34 119.847 71.0139   1
  -1  -3  33-27.0777 43.1513   2
   1   3 -33 47.0021 50.1513   4
  -1   3  33 30.4055 61.7509   2
   1  -3 -33-4.32622 44.1548   4
   1  -3 -33 34.7556 65.3911   3
   1   3 -33 8.43334 52.4967   3
  -1  -3  33 71.4772 64.2929   1
  -1  -3  32 173.789 68.8356   1
  -1  -3  32 183.898 53.1182   2
   1  -3 -32 126.066 66.8180   3
   1   3 -32 92.6256 45.1819   4
   1   3 -32 156.718 63.5826   3
   1  -3 -32 142.685 55.0400   4
  -1   3  32 84.2360 58.8314   2
   1  -3 -31 41.6732 62.4529   3
  -1   3  31 22.1858 31.0630   1
   1  -3 -31 45.4953 44.2860   4
  -1  -3  31 75.7718 44.6573   2
   1   3 -31-26.3680 41.8863   4
  -1   3  31 61.9165 59.2005   2
  -1  -3  31-66.6382 56.5291   1
   1   3 -31-29.4549 55.4117   3
   1  -3 -30 62.7908 50.2260   4
  -1  -3  30 31.3397 38.4131   2
  -1   3  30 94.1898 63.2117   2
  -1   3  30-2.83210 25.9856   1
   1   3 -30 100.982 63.9475   3
   1  -3 -30 114.028 68.4327   3
   1   3 -30 80.5403 45.7658   4
  -1  -3  30 129.537 66.5271   1
   1  -3 -29-64.6760 46.5816   4
  -1   3  29 8.24566 24.7008   1
  -1  -3  29 11.7974 39.0556   2
   1   3 -29 90.3654 47.8847   4
   1   3 -29-2.19179 50.6285   3
   1  -3 -29-33.4259 59.7717   3
  -1   3  29 29.4108 50.9504   2
  -1  -3  29 20.9794 52.2124   1
  -1   3  28 54.2572 27.6110   1
   1  -3 -28 120.789 70.9838   3
   1  -3 -28 8.18291 37.9947   4
   1   3 -28-40.6475 52.4374   3
  -1  -3  28 93.2407 41.1634   2
   1   3 -28 36.7074 37.8107   4
  -1   3  28-0.67445 49.2974   2
  -1  -3  28 66.8626 55.8833   1
   1  -3 -27 354.813 63.6632   4
  -1  -3  27 413.469 56.9004   2
   1   3 -27 321.039 58.0996   4
   1  -3 -27 351.420 82.4774   3
  -1   3  27 377.249 75.5081   2
   1   3 -27 414.193 79.0870   3
  -1  -3  27 260.589 67.6639   1
  -1   3  27 329.334 41.6431   1
   1  -3 -26 122.615 69.4974   3
   1   3 -26 146.514 44.1213   4
   1  -3 -26 195.749 54.4289   4
   1   3 -26 130.577 60.8140   3
  -1  -3  26 96.2615 38.9382   2
  -1   3  26 149.217 58.6152   2
  -1   3  26 154.653 31.7286   1
  -1  -3  26 188.340 63.3092   1
   1  -3 -25 45.4076 39.8568   4
  -1  -3  25 77.3501 57.0386   1
   1  -3 -25 85.7588 55.5615   3
   1   3 -25 82.8007 39.5067   4
  -1   3  25 83.7286 51.9745   2
  -1  -3  25 85.4165 38.3592   2
   1   3 -25 97.9548 59.6373   3
  -1   3  25 32.6469 22.1248   1
   1   3 -24 226.669 49.5713   4
  -1  -3  24 181.079 43.0616   2
   1  -3 -24 153.519 46.4741   4
   1  -3 -24 177.129 65.2125   3
   1   3 -24 214.192 57.7220   3
  -1  -3  24 308.287 70.6457   1
  -1   3  24 162.334 51.7891   2
  -1   3  24 195.093 30.4277   1
  -1  -3  23 101.912 37.6105   2
   1  -3 -23 102.549 46.3994   4
   1   3 -23-19.4483 34.4665   4
   1  -3 -23 17.5673 51.4320   3
   1   3 -23 25.9736 46.0187   3
  -1  -3  23 39.4848 47.0659   1
  -1   3  23 45.3488 44.4745   2
  -1   3  23 29.1280 20.2732   1
   1  -3 -22 1384.94 98.0348   4
  -1   3  22 1358.06 112.496   2
  -1  -3  22 1378.25 116.735   1
  -1   3  22 1167.11 54.8839   1
   1   3 -22 1226.10 108.764   3
  -1  -3  22 1399.73 87.3799   2
   1  -3 -22 1203.70 122.841   3
   1   3 -22 1343.86 94.9883   4
   1  -3 -21 110.961 22.2243   1
  -1  -3  21 137.093 37.5227   2
   1  -3 -21 151.464 40.2328   4
   1   3 -21 113.720 48.5050   3
  -1   3  21 158.150 52.3678   2
  -1   3  21 154.709 23.6533   1
   1  -3 -21 265.400 71.3826   3
   1   3 -21 164.126 40.8239   4
  -1  -3  21 132.135 56.5860   1
  -1  -3  20 206.545 55.7650   1
   1   3 -20 280.293 62.9086   3
   1  -3 -20 156.981 22.2536   1
  -1   3  20 218.281 23.3680   1
   1   3 -20 246.956 46.2998   4
  -1   3  20 188.555 52.8119   2
   1  -3 -20 227.524 45.7058   4
   1  -3 -20 236.684 66.8519   3
  -1  -3  20 239.263 42.1707   2
   1   3 -19 474.184 62.0529   4
  -1  -3  19 628.478 78.6275   1
  -1   3  19 476.285 70.0137   2
   1   3 -19 498.650 75.2549   3
   1  -3 -19 383.576 80.4234   3
   1  -3 -19 511.413 62.2612   4
   1  -3 -19 293.987 25.3879   1
  -1  -3  19 519.570 53.4104   2
  -1   3  19 398.977 27.9480   1
   1   3 -18 167.271 44.3190   4
  -1  -3  18 219.953 54.6167   1
   1  -3 -18 162.344 41.9393   4
  -1   3  18 122.523 46.4635   2
   1  -3 -18 57.6465 47.7317   3
  -1   3  18 106.375 14.3030   1
   1   3 -18 162.998 54.8544   3
   1  -3 -17 1236.54 86.1146   4
  -1  -3  17 1164.53 100.043   1
  -1   3  17 1227.60 102.760   2
   1   3 -17 1135.48 73.2027   2
   1  -3 -17 940.604 105.937   3
   1   3 -17 1155.25 85.0163   4
   1   3 -17 1128.08 100.192   3
  -1  -3  16 128.781 48.5619   1
   1   3 -16 130.434 36.3398   2
   1  -3 -16 208.402 43.7776   4
   1   3 -16 165.512 49.4039   3
  -1   3  16 231.954 58.5010   2
   1   3 -16 234.868 46.4158   4
  -1  -3  15 250.836 53.0633   1
   1   3 -15 262.463 50.5139   4
   1   3 -15 278.778 59.4290   3
  -1   3  15 225.268 56.7197   3
  -1   3  15 206.413 51.4603   2
   1   3 -15 263.558 40.8777   2
   1  -3 -15 312.162 53.1461   4
   1   3 -14 551.402 55.9099   2
  -1   3  14 650.748 80.0127   3
   1   3 -14 615.674 78.3606   3
  -1   3  14 586.085 67.3469   2
   1   3 -14 691.033 66.9658   4
  -1  -3  14 747.663 77.1155   1
   1  -3 -14 639.232 65.6571   4
   1  -3 -13 249.694 48.3378   4
  -1  -3  13 245.942 50.2044   1
   1   3 -13 257.835 51.4265   3
   1   3 -13 159.432 38.0969   2
  -1  -3  13 254.821 53.9742   4
  -1   3  13 294.705 54.1415   2
  -1   3  13 292.993 58.3419   3
   1  -3 -12 417.621 53.3590   4
  -1  -3  12 390.291 60.8387   1
  -1  -3  12 407.569 64.3399   4
   1   3 -12 408.358 62.6556   3
  -1   3  12 389.565 64.6605   3
   1   3 -12 322.911 47.7821   2
  -1   3  12 370.116 54.8374   2
  -1  -3  11 186.593 45.0507   1
  -1  -3  11 187.403 50.3117   4
   1   3 -11 192.724 50.1284   3
   1  -3 -11 279.803 47.9446   4
   1   3 -11 128.379 40.7353   2
  -1   3  11 226.512 53.5734   3
  -1   3  11 243.775 48.3340   2
   1  -3 -10 15.4795 31.2446   4
  -1  -3  10 48.2803 37.9929   1
   1   3 -10 15.6625 30.3423   2
  -1  -3  10 45.4156 39.6791   4
  -1   3  10 15.3555 36.7587   3
   1   3 -10 79.6195 39.2070   3
  -1   3  10 35.8504 35.0545   2
  -1   3   9 713.336 67.6267   2
  -1  -3   9 905.571 79.5232   4
   1   3  -9 717.969 61.5371   2
  -1  -3   9 838.969 72.2060   1
   1   3  -9 790.596 75.0984   3
  -1   3   9 813.021 82.4222   3
   1  -3  -9 789.366 67.1126   4
   1  -3  -8 30.0927 32.1706   4
  -1   3   8 4.98352 34.8828   3
  -1  -3   8 8.39545 38.0700   4
   1   3  -8-5.66919 29.3534   2
  -1  -3   8 30.9214 32.3048   1
   1   3  -8 25.1051 37.5398   3
  -1   3   8 21.1906 29.5815   2
  -1   3   7-5.83734 33.6197   3
  -1  -3   7 10.4308 35.5299   4
   1  -3  -7-17.7334 33.1346   4
  -1  -3   7 31.4288 32.1288   1
   1   3  -7 45.0303 41.8898   3
   1   3  -7-3.60631 29.1810   2
  -1   3   7-6.01759 32.1867   2
  -1  -3   6 417.135 53.9214   1
   1   3  -6 432.897 59.8790   3
   1   3  -6 416.674 49.5621   2
  -1   3   6 417.735 49.6433   2
   1  -3  -6 383.889 21.3754   1
  -1   3   6 474.067 59.7723   3
   1  -3  -6 469.849 53.4229   4
   1  -3  -6 306.746 21.6787   1
  -1  -3   6 414.879 57.0890   4
   1  -3  -5 16.4448 12.2799   1
  -1   3   5 58.7226 33.5344   2
  -1  -3   5 110.246 43.7952   4
  -1  -3   5 35.5760 29.0146   1
   1   3  -5 17.6204 38.2975   3
   1   3  -5 36.1172 33.7354   2
   1  -3  -5 36.2901 14.1156   1
   1  -3  -5 41.0959 38.0241   4
  -1   3   5 28.0795 40.6026   3
  -1  -3   4 1359.56 78.5273   1
   1   3  -4 1390.83 79.3283   2
  -1  -3   4 1353.12 90.0146   4
   1  -3  -4 1346.14 45.6357   1
  -1   3   4 1365.82 72.2411   2
   1   3  -4 1341.62 92.1019   3
   1  -3  -4 1309.43 84.4644   4
   1  -3  -4 1184.31 45.4121   1
  -1   3   4 1402.01 90.4313   3
   1   3  -3 94.8556 34.2563   2
   1  -3  -3 48.4840 17.8459   1
  -1   3   3 67.0728 28.9457   2
  -1   3   3 60.1621 37.8592   3
   1  -3  -3 24.1439 35.2662   4
  -1  -3   3 75.3701 31.2981   1
   1  -3  -3 61.6513 19.9591   1
   1   3  -3 159.806 48.2454   3
  -1  -3   3 171.329 49.1307   4
  -1   3   2 435.833 42.4374   2
   1   3  -2 468.033 60.4782   3
   1   3  -2 503.882 54.8358   2
   1  -3  -2 528.535 61.0809   4
  -1  -3   2 444.270 49.9061   1
  -1   3   2 410.875 51.0895   3
  -1  -3   2 466.569 59.1575   4
   1  -3  -2 452.544 34.2609   1
   1  -3  -2 455.379 33.9627   1
   1  -3  -1 336.320 34.5325   1
  -1  -3   1 182.653 38.7718   1
  -1   3   1 254.839 49.0273   3
   1   3  -1 177.423 40.7580   2
   1   3  -1 232.558 49.9169   3
  -1   3   1 251.046 36.8563   2
  -1  -3   1 254.448 53.0822   4
   1  -3  -1 313.712 56.2524   4
   1  -3   0 4748.23 167.569   4
   1   3   0 4726.13 155.000   3
  -1  -3   0 4513.70 132.973   1
  -1  -3   0 4694.81 156.804   4
  -1   3   0 5064.93 115.455   2
  -1   3   0 4931.61 163.417   3
   1  -3   0 4987.05 112.175   1
   1   3   0 4820.51 142.152   2
   1  -3   1 13957.7 192.890   1
  -1  -3  -1 13521.3 221.696   1
  -1  -3  -1 14013.0 267.651   4
  -1   3  -1 13471.2 256.635   3
   1  -3   1 13650.4 270.784   4
  -1   3  -1 13782.2 175.094   2
   1   3   1 14094.9 242.946   2
   1   3   1 13947.8 261.556   3
   1  -3   1 13458.2 175.555   2
   1  -3   2 4470.25 117.548   1
  -1   3  -2 4605.30 95.9655   2
   1  -3   2 4540.82 96.1624   2
  -1  -3  -2 5091.48 166.954   4
   1   3   2 4983.82 151.905   2
  -1   3  -2 4560.80 152.968   3
  -1  -3  -2 4643.11 129.545   1
   1   3   2 4813.25 155.090   3
  -1   3  -3 1788.00 56.9185   2
  -1  -3  -3 1952.40 106.280   4
   1   3   3 1875.13 98.6145   2
   1  -3   3 1777.95 56.2339   2
   1  -3   3 1803.69 78.4274   1
  -1   3  -3 1692.67 100.367   4
  -1  -3  -3 1751.19 82.9335   1
   1   3   3 1696.83 96.6790   3
  -1   3  -3 1713.01 99.0783   3
   1   3   4 2478.44 110.627   2
  -1   3  -4 2150.16 56.2165   2
  -1  -3  -4 2307.16 89.3503   1
  -1   3  -4 2478.37 115.315   4
   1  -3   4 2300.70 92.1098   1
  -1   3  -4 2395.56 113.014   3
   1   3   4 2221.20 109.708   3
   1  -3   4 2187.82 56.1707   2
  -1  -3  -4 2459.17 120.122   4
   1  -3   5 505.052 25.2920   2
  -1  -3  -5 524.795 64.1795   4
  -1   3  -5 461.821 25.3412   2
   1   3   5 574.601 59.4712   3
   1  -3   5 580.154 52.6247   1
  -1   3  -5 535.959 63.1913   3
  -1   3  -5 604.174 65.3674   4
  -1  -3  -5 606.079 49.9390   1
   1   3   5 630.395 67.7811   2
  -1   3  -6 441.320 59.4386   4
   1  -3   6 366.050 45.9078   1
  -1  -3  -6 315.929 38.1751   1
  -1   3  -6 373.863 56.7610   3
   1   3   6 283.677 48.4797   3
  -1  -3  -6 376.936 59.6672   4
   1   3   6 357.980 52.6508   2
  -1  -3  -7 746.212 72.1780   4
   1   3   7 784.115 69.4293   3
  -1   3  -7 753.527 68.4142   3
  -1   3  -7 752.122 71.0275   4
  -1  -3  -7 809.475 55.4358   1
   1   3   7 705.226 70.7757   2
   1  -3   7 780.024 63.3091   1
   1   3   8 9.02739 31.6993   3
   1  -3   8 12.5784 30.6290   1
  -1   3  -8 45.5524 37.7316   4
  -1  -3  -8 67.7153 25.2743   1
   1   3   8-15.7790 39.7241   2
  -1  -3  -8 29.0673 37.8663   4
  -1   3  -8 30.2775 36.2702   3
   1   3   9 428.190 60.3198   2
  -1   3  -9 400.656 57.7794   4
  -1  -3  -9 498.927 45.0556   1
   1   3   9 500.647 58.3830   3
  -1  -3  -9 471.560 64.0185   4
   1  -3   9 442.267 54.4624   1
  -1   3  -9 462.475 61.7200   3
  -1   3 -10 396.543 58.3922   3
   1   3  10 393.272 64.1014   2
   1   3  10 346.650 51.2952   3
  -1   3 -10 326.766 57.0230   4
  -1  -3 -10 373.152 40.0251   1
   1  -3  10 365.912 55.5119   1
  -1  -3 -10 347.155 57.2362   4
  -1  -3 -11 604.824 69.9237   4
  -1   3 -11 534.473 67.8205   4
  -1   3 -11 607.547 67.0651   3
  -1  -3 -11 537.816 45.2578   1
   1   3  11 582.520 63.3160   3
   1   3  11 498.206 65.2047   2
   1  -3  11 524.307 62.4023   1
   1   3  12 105.417 41.4593   2
   1  -3  12 163.125 45.9380   1
   1   3  12 157.103 44.3746   3
  -1   3 -12 194.112 50.1323   3
  -1  -3 -12 216.733 55.1662   4
  -1   3 -12 108.865 41.9152   4
  -1  -3 -12 103.461 27.3729   1
   1  -3  13 454.640 58.7703   1
   1   3  13 492.515 69.4044   2
  -1  -3 -13 482.270 43.1801   1
  -1  -3 -13 453.470 64.9361   4
   1   3  13 464.394 60.7097   3
  -1   3 -13 424.746 62.1212   4
  -1   3 -13 435.300 61.4999   3
   1   3  14 92.8774 43.5456   3
  -1   3 -14 15.7178 38.5993   3
  -1   3 -14 83.4533 43.4133   4
   1  -3  14 116.989 45.7727   1
   1   3  14 116.958 57.7438   2
  -1  -3 -14 57.9245 43.5945   4
  -1  -3 -14 46.2509 23.6149   1
   1  -3  15 1216.31 99.5794   1
  -1  -3 -15 925.457 58.5829   1
  -1   3 -15 1202.30 96.8670   4
   1   3  15 1023.12 86.0332   3
  -1   3 -15 1291.95 99.6198   3
   1   3  15 997.985 94.2634   2
  -1  -3 -15 916.134 86.3902   4
  -1  -3 -16 589.635 72.6529   4
   1   3  16 579.070 74.8517   2
   1  -3  16 503.204 74.5026   1
  -1   3 -16 423.011 61.9331   4
  -1   3 -16 633.520 73.8844   3
  -1  -3 -16 516.841 46.3111   1
   1   3  16 531.215 68.0117   3
   1  -3  17 486.485 71.3220   1
   1   3  17 504.435 73.2320   2
  -1   3 -17 528.370 70.6409   3
   1   3  17 457.253 46.8793   1
  -1  -3 -17 577.491 75.6046   4
   1   3  17 508.679 67.7149   3
  -1   3 -17 435.472 64.8590   4
   1  -3  18 505.655 73.6853   1
   1  -3  18 345.958 21.8976   2
   1   3  18 483.238 52.4297   1
  -1   3 -18 524.648 69.6937   3
  -1   3 -18 254.355 20.1740   2
  -1   3 -18 484.510 70.8665   4
  -1  -3 -18 503.095 72.1596   4
   1   3  18 474.163 67.9151   3
   1   3  18 471.058 73.0064   2
   1   3  19 216.760 51.4620   3
  -1  -3 -19 160.661 51.3880   4
  -1   3 -19 113.466 17.5851   2
   1   3  19 190.048 36.5938   1
  -1   3 -19 233.458 54.6180   3
   1   3  19 201.201 63.2362   2
   1  -3  19 168.501 19.4183   2
  -1   3 -19 146.548 50.1227   4
   1  -3  19 206.933 56.4959   1
   1   3  20 96.8164 44.4633   3
   1   3  20 71.3690 27.5447   1
  -1   3 -20 115.233 50.1570   4
   1  -3  20 83.5838 17.9272   2
   1   3  20 81.3204 52.0937   2
   1  -3  20 55.9193 50.0383   1
  -1   3 -20 35.4652 14.5148   2
  -1   3 -20 161.284 53.3047   3
  -1  -3 -20 78.1199 46.8499   4
  -1   3 -21 98.4787 53.0579   4
   1   3  21 23.9469 46.2998   2
  -1  -3 -21 24.1225 44.3294   4
   1  -3  21 55.0746 18.2507   2
  -1   3 -21-21.2686 43.6125   3
   1  -3  21 6.48119 44.4370   1
  -1   3 -21 10.5464 15.7633   2
   1   3  21 19.4363 26.5927   1
   1   3  22 1380.47 124.975   2
  -1   3 -22 1429.74 113.766   3
   1  -3  22 1313.54 119.488   1
   1   3  22 1221.33 78.9581   1
  -1   3 -22 1207.31 104.402   4
  -1  -3 -22 1325.38 114.020   3
   1  -3  22 1160.88 56.1141   2
  -1  -3 -22 1444.12 115.292   4
  -1   3 -23 136.119 46.1973   4
   1  -3  23 128.796 27.4202   2
   1   3  23 155.479 37.6268   1
  -1  -3 -23 74.9053 54.0856   3
  -1  -3 -23 124.130 55.5789   4
  -1   3 -23 57.1237 45.1399   3
   1   3  23 83.5766 57.2724   2
   1  -3  23 112.854 57.2930   1
  -1  -3 -24 90.0970 54.6637   3
   1   3  24-10.5759 55.2045   2
   1  -3  24 11.8256 45.6847   1
  -1  -3 -24-21.5909 48.7325   4
   1   3  24 18.9360 30.7405   1
  -1   3 -24 7.65952 40.1945   3
   1  -3  24 78.7764 27.2792   2
  -1   3 -24 16.4282 42.0666   4
  -1  -3 -25 310.375 67.1383   4
  -1   3 -25 231.499 60.2710   4
   1   3  25 228.908 67.9267   2
   1   3  25 229.766 47.5076   1
   1  -3  25 242.902 69.8221   1
  -1   3 -25 171.325 54.6898   3
   1  -3  25 258.938 36.3351   2
  -1  -3 -25 148.417 52.9246   3
  -1   3 -26 43.0417 43.8118   3
   1   3  26 39.4771 35.4821   1
  -1   3 -26 93.5930 54.0323   4
   1  -3  26-2.36863 51.4245   1
  -1  -3 -26 42.6649 52.3093   3
   1   3  26 85.8580 62.0523   2
   1  -3  26 87.9071 29.7607   2
  -1  -3 -26 121.301 55.5205   4
   1   3  27 2204.85 165.281   2
   1   3  27 1984.54 111.409   1
  -1   3 -27 1856.51 136.657   4
   1  -3  27 2115.14 161.108   1
  -1  -3 -27 2100.53 146.000   4
  -1   3 -27 2159.26 143.749   3
  -1  -3 -27 1797.00 143.332   3
   1  -3  27 1920.68 88.9117   2
   1  -3  28 354.635 46.4325   2
  -1   3 -28 231.620 63.8040   4
  -1  -3 -28 258.379 69.2269   4
   1  -3  28 288.465 79.2120   1
  -1  -3 -28 232.069 72.2163   3
   1   3  28 259.669 51.8562   1
   1   3  28 266.267 73.4754   2
  -1   3 -28 223.141 62.5071   3
  -1  -3 -29 153.001 60.1688   4
  -1  -3 -29 137.855 59.5596   3
  -1   3 -29 140.104 57.2987   3
   1   3  29 167.790 42.1554   1
   1  -3  29 62.8705 33.1040   2
  -1   3 -29 73.3359 49.4417   4
   1  -3  29 137.891 62.8728   1
   1   3  29 236.456 76.5464   2
   1  -3  30 109.399 38.8063   2
  -1   3 -30 126.353 60.7803   4
   1   3  30 69.1482 40.9059   1
   1  -3  30 226.023 86.7665   1
   1   3  30 72.7776 58.3835   2
  -1  -3 -30 59.2460 53.5807   3
  -1  -3 -30 6.31096 50.4960   4
  -1   3 -30 79.4157 55.1886   3
  -1  -3 -31 84.2349 61.3782   4
  -1   3 -31 96.7493 60.0516   4
   1  -3  31-5.15295 35.4347   2
  -1  -3 -31 55.0814 56.9622   3
   1   3  31 80.2600 67.0170   2
   1  -3  31 168.037 71.4119   1
  -1   3 -31 49.2970 53.1109   3
   1   3  31 76.5364 42.4124   1
   1   3  32 296.264 90.9962   2
  -1  -3 -32 306.070 77.5626   4
   1   3  32 355.193 65.5384   1
   1  -3  32 395.309 87.7450   1
  -1   3 -32 377.225 82.3988   4
  -1  -3 -32 332.680 85.9454   3
  -1   3 -32 382.374 75.0350   3
   1   3  33 1621.18 119.262   1
   1  -3  33 1412.73 148.962   1
  -1   3 -33 1639.59 142.040   4
   1   3  33 1703.46 162.469   2
  -1  -3 -33 1621.29 148.898   3
  -1  -3 -33 1698.75 147.389   4
  -1   3 -33 1638.77 137.833   3
   1   3  34 266.419 83.9518   2
  -1   3 -34 232.580 71.8438   4
   1   3  34 143.818 51.9030   1
  -1  -3 -34 270.189 77.9414   4
  -1  -3 -34 191.990 70.1022   3
   1  -3  34 156.931 72.5452   1
  -1   3 -34 206.516 65.1498   3
  -1  -3 -35 123.890 70.6188   3
   1   3  35 316.936 92.6326   2
  -1   3 -35 84.5905 61.8335   4
   1  -3  35 167.226 76.4290   1
   1   3  35 35.8103 45.7099   1
  -1   3 -35 184.966 70.5056   3
  -1  -3 -35 112.044 62.9363   4
  -1   3 -36 97.8701 61.8822   3
   1   3  36 103.569 69.2661   2
  -1  -3 -36 107.370 69.9767   3
  -1   3 -36 44.0496 51.0804   4
   1  -3  36 116.548 72.8493   1
   1   3  36 72.4016 53.0810   1
  -1  -3 -36 19.2057 55.7787   4
  -1   3 -37 52.8151 53.9920   3
   1  -3  37 51.7651 68.0405   1
  -1  -3 -37 136.585 75.8210   3
  -1  -3 -37-64.1973 66.3172   4
   1   3  37 3.14147 66.9812   2
   1   3  37 102.931 59.6476   1
  -1   3 -37 97.2636 59.5382   4
  -1  -3 -38 1471.51 147.204   4
   1  -3  38 1139.21 145.873   1
  -1  -3 -38 1253.80 140.010   3
  -1   3 -38 1102.31 124.257   3
  -1   3 -38 1121.92 128.404   4
   1   3  38 1483.43 166.622   2
  -1   3 -39 445.879 86.1217   3
   1  -3  39 420.697 103.787   1
  -1  -3 -39 468.314 98.3275   4
  -1  -3 -39 450.588 99.1436   3
   1   3  39 392.251 100.860   2
  -1   3 -39 475.833 92.6256   4
  -1  -3 -40-89.2371 68.0958   3
  -1  -3 -40-29.6396 63.3897   4
  -1   3 -40 44.7429 55.6299   3
  -1   3 -40-146.958 71.9289   4
   1   3  40 24.9090 77.1287   2
   1  -3  40-28.2972 70.0893   1
   1   3  41 25.0308 74.0432   2
  -1   3 -41 102.240 68.6943   4
  -1  -3 -41 144.438 71.0888   4
  -1  -3 -41-117.617 74.6142   3
   1  -3  41 27.4288 67.1665   1
  -1   3 -41 19.9671 58.8852   3
  -1   3 -42 29.5104 59.9790   3
   1  -3  42 83.9269 73.4926   1
  -1  -3 -42 75.7047 78.4984   4
  -1   3 -42-0.87442 55.8862   4
  -1  -3 -42 227.889 89.7723   3
   1   3  42-98.9737 85.2743   2
  -1  -3 -43 232.721 90.7718   3
   1   3  43 196.983 94.3473   2
  -1   3 -43 125.314 67.3939   4
  -1  -3 -43 67.2124 61.4503   4
   1  -3  43 236.614 100.349   1
  -1   3 -43 150.517 69.5787   3
   1  -3  44 101.025 82.2096   1
  -1   3 -44 94.3920 64.5816   4
  -1  -3 -44 43.5837 66.3050   3
   1   3  44 237.012 106.467   2
  -1   3 -44 13.5448 57.6679   3
  -1  -3 -44 22.6622 68.7278   4
  -1   3 -45 56.8450 62.4232   3
   1   3  45 63.4979 91.6186   2
  -1   3 -45 21.4306 59.6219   4
  -1  -3 -45 8.46562 67.4495   3
  -1  -3 -45-3.55600 64.5977   4
   1  -3  45 119.679 86.5500   1
  -1  -3 -46 84.3236 69.7748   4
  -1   3 -46 54.9454 64.6009   3
   1   3  46 109.817 91.3554   2
  -1  -3 -46 63.6912 75.8771   3
   1  -3  46-26.4945 82.7010   1
  -1   3 -46-18.8822 62.8277   4
  -1   3 -47 13.1422 68.9186   4
  -1  -3 -47 22.7896 67.2574   4
   1   3  47 79.2125 95.6204   2
   1  -3  47 218.598 103.713   1
  -1   3 -47 27.1658 64.8755   3
  -1  -3 -47 73.9141 73.8520   3
   1   3  48 118.871 99.8876   2
   1  -3  48-20.3305 77.3278   1
  -1  -3 -48 30.9583 71.1120   4
  -1  -3 -48 48.1783 69.9868   3
  -1   3 -48-4.02125 63.2856   3
  -1   3 -48 34.7647 63.5603   4
   1  -3  49-14.8541 82.7010   1
  -1   3 -49-40.2484 64.1600   3
  -1  -3 -49 192.143 89.2605   3
  -1   3 -49 123.351 72.3969   4
  -1  -3 -49 23.5017 76.6757   4
   1   3  50-34.6994 83.8077   2
  -1  -3 -50 113.434 85.4905   4
  -1   3 -50 59.5820 70.8897   4
  -1  -3 -50 14.3425 72.0057   3
   1  -3  50 50.3120 90.6522   1
  -1   3 -50 4.92293 64.3058   3
  -1  -3 -51 197.190 88.8655   4
  -1  -3 -51 111.996 83.4588   3
  -1   3 -51-33.4387 67.8978   4
   1   3  51 82.6472 84.0746   2
   1  -3  52 104.869 111.107   1
  -1  -3 -52-48.0273 86.5398   4
  -1  -3 -52 78.7116 90.3764   3
   1   3  52 24.9844 89.9606   2
  -1   3 -52-208.452 92.1073   4
  -1  -3 -53-35.3338 79.0835   4
  -1   3 -53 91.2723 82.3823   4
   1   3  53 19.0721 99.4362   2
   1  -3  53 64.7994 84.3627   1
  -1  -3 -54 248.340 104.870   4
  -1   3 -54 412.110 109.945   4
   1   3  54 170.599 104.918   2
  -1  -3 -55 251.872 105.894   4
  -1   3 -55 182.600 90.2770   4
  -1  -3 -56 20.1239 82.9282   4
  -1   3 -56-5.29829 69.8231   4
   1   4 -53 186.185 105.946   3
   1  -4 -52 118.675 96.2027   3
   1   4 -52 123.072 90.1916   3
  -1  -4  51-43.3048 99.0426   1
  -1   4  51-24.6704 85.9986   2
   1  -4 -51 72.4229 87.3327   3
   1   4 -51 15.5741 78.5130   3
  -1  -4  50 28.8531 96.9585   1
  -1   4  50-6.89515 94.2336   2
   1  -4 -50-8.92471 91.5807   3
   1   4 -50 118.522 89.8692   3
  -1  -4  49 53.1031 88.8158   1
   1  -4 -49 192.722 111.101   3
  -1   4  49 16.9023 87.0554   2
   1   4 -49-86.7743 75.6088   3
   1  -4 -48 156.723 96.1961   3
  -1  -4  48 156.066 92.2757   1
   1   4 -48-27.0645 72.5183   3
  -1   4  48 2.13850 86.4024   2
  -1  -4  47-46.4656 85.3776   1
   1   4 -47-2.46142 71.5726   3
   1  -4 -47-37.9915 78.7665   3
   1   4 -47 63.1095 61.3579   4
  -1   4  47 191.067 94.8953   2
  -1  -4  46-19.2678 76.8486   1
   1   4 -46 12.1617 57.2050   4
   1   4 -46-22.4558 68.2380   3
   1  -4 -46 132.642 94.1785   3
  -1   4  46 1.78670 91.2338   2
   1   4 -45 113.538 78.7787   3
  -1  -4  45 40.1472 82.3075   1
   1  -4 -45 21.0178 74.0016   3
  -1   4  45 87.4360 94.5517   2
   1   4 -45 141.304 66.4595   4
   1  -4 -44 224.784 106.155   3
   1   4 -44 177.249 88.8350   3
  -1   4  44 190.223 98.6307   2
   1   4 -44 212.137 75.2900   4
  -1  -4  44 64.7895 73.0756   1
  -1  -4  43 38.7551 72.7522   1
   1   4 -43 107.417 77.4082   3
   1  -4 -43 92.0945 68.2100   4
   1  -4 -43 236.576 100.455   3
  -1   4  43-60.3351 89.3188   2
   1   4 -43-35.8834 57.7722   4
   1  -4 -42 32.5525 61.8904   4
   1   4 -42-3.16628 50.1745   4
  -1   4  42 43.3322 76.9025   2
   1   4 -42 25.1083 67.2084   3
   1  -4 -42 18.4651 75.1596   3
  -1  -4  42 15.3452 72.3577   1
  -1  -4  41 153.097 83.0204   1
   1  -4 -41-62.6912 61.6972   4
   1  -4 -41 40.7236 76.2983   3
   1   4 -41 44.6389 54.8301   4
  -1   4  41-54.2204 76.9927   2
   1   4 -41 88.2621 75.7456   3
  -1  -4  40 153.768 82.2597   1
   1  -4 -40 36.5824 77.2895   3
   1  -4 -40-27.4807 68.1760   4
  -1   4  40 91.8531 83.5801   2
   1   4 -40 19.4258 51.5909   4
   1   4 -40 199.237 77.6509   3
  -1  -4  39 181.612 92.8791   1
   1  -4 -39 40.2589 60.2656   4
   1  -4 -39 172.759 82.7708   3
   1   4 -39 113.938 70.7012   3
  -1   4  39 232.706 94.0340   2
   1   4 -39 8.24293 50.5348   4
   1  -4 -38 54.3998 72.2968   3
  -1   4  38 26.7964 63.0869   2
   1  -4 -38-47.3069 58.0456   4
   1   4 -38 33.9181 63.8008   3
  -1  -4  38-4.86378 67.7861   1
   1   4 -38-38.7909 53.7617   4
   1  -4 -37 92.8731 53.6857   4
   1   4 -37 61.9794 45.0232   4
   1  -4 -37 187.756 88.7631   3
  -1   4  37 76.6780 70.0786   2
   1   4 -37 53.0894 58.6970   3
  -1  -4  37 47.8326 63.5245   1
   1   4 -36-0.96099 47.3082   4
   1  -4 -36 88.5702 59.6208   4
   1  -4 -36 140.125 84.1719   3
  -1   4  36 139.116 81.5862   2
   1   4 -36 109.607 74.4347   3
  -1  -4  36 17.0634 63.6438   1
   1  -4 -35 52.2231 82.5637   3
  -1  -4  35 21.4727 63.6512   1
   1   4 -35 3.54186 54.2021   3
  -1   4  35 156.387 77.5982   2
   1  -4 -35 68.6135 53.5380   4
   1   4 -35 40.4026 49.6266   4
   1   4 -34 74.1466 57.7526   3
  -1  -4  34 135.462 79.5764   1
   1   4 -34 174.898 58.2777   4
   1  -4 -34 300.344 77.9548   4
   1  -4 -34 199.382 82.9485   3
  -1   4  34 127.268 70.4197   2
   1   4 -33 267.222 58.3791   4
  -1   4  33 373.645 93.9501   2
  -1  -4  33 405.371 97.8400   1
   1  -4 -33 422.335 78.2989   4
   1  -4 -33 234.725 88.4407   3
   1   4 -33 175.474 70.7861   3
   1  -4 -32 1522.87 130.096   4
   1   4 -32 1492.71 124.612   4
   1   4 -32 1491.82 144.125   3
   1  -4 -32 1454.02 166.182   3
  -1  -4  32 1598.34 155.176   1
  -1   4  32 1390.89 147.560   2
   1  -4 -31 219.013 64.7389   4
   1  -4 -31 223.284 88.2203   3
   1   4 -31 293.242 67.5171   4
  -1   4  31 245.157 81.2624   2
   1   4 -31 294.733 80.4284   3
  -1  -4  31 151.661 70.8428   1
  -1  -4  30 288.442 80.7792   1
   1   4 -30 372.566 73.7510   4
   1  -4 -30 448.919 103.764   3
  -1   4  30 405.491 88.1466   2
   1  -4 -30 492.965 80.3243   4
   1   4 -30 338.076 82.3170   3
  -1   4  29 218.634 75.6031   2
  -1  -4  29 68.9810 63.6898   1
   1  -4 -29 70.3165 52.8496   4
   1   4 -29 128.292 50.8146   4
   1  -4 -29 54.2183 65.7220   3
   1   4 -29 108.966 59.0308   3
   1  -4 -28 155.133 81.2474   3
  -1  -4  28 160.579 72.9765   1
   1  -4 -28 15.1744 43.5126   4
   1   4 -28 51.1023 35.3964   2
   1   4 -28 40.9077 49.4924   4
   1   4 -28 67.2789 55.5093   3
  -1   4  28 35.0408 54.8111   2
  -1  -4  27 218.772 69.5065   1
  -1   4  27 367.764 80.3343   2
   1   4 -27 289.342 49.1924   2
   1  -4 -27 81.5516 62.0156   3
   1   4 -27 324.786 63.9687   4
   1   4 -27 274.224 71.9309   3
   1  -4 -27 240.693 53.7800   4
  -1  -4  26 51.6782 55.2977   1
  -1   4  26-8.32439 51.2914   2
   1  -4 -26 46.2164 43.7989   4
   1   4 -26 30.0829 31.5298   2
   1   4 -26-41.7211 41.5021   4
   1  -4 -26-66.5948 63.6130   3
   1   4 -26 1.48579 51.4848   3
  -1  -4  25 113.066 61.0789   1
   1   4 -25 51.0631 41.8824   4
   1  -4 -25-22.1397 64.9316   3
   1  -4 -25-4.30649 40.3615   4
  -1   4  25 23.7894 58.0470   2
   1   4 -25 133.286 55.3972   3
   1   4 -25 41.2356 33.7022   2
   1   4 -24 105.434 34.7958   2
   1   4 -24 131.434 49.4237   4
   1  -4 -24 55.9580 67.9787   3
   1  -4 -24 118.763 47.8543   4
  -1   4  24 151.024 57.6046   2
  -1  -4  24 121.215 52.3009   1
   1   4 -24 137.056 55.8867   3
   1   4 -23 54.6450 31.7551   2
  -1  -4  23-24.9155 54.7822   1
  -1   4  23 24.2698 45.5615   2
   1   4 -23 87.6030 52.0448   3
   1   4 -23 93.6515 48.0752   4
   1  -4 -23 57.2413 40.9280   4
   1  -4 -23 99.4873 66.9159   3
  -1  -4  22 335.081 69.6528   1
   1  -4 -22 389.931 64.4686   4
   1   4 -22 336.143 64.5788   4
  -1   4  22 283.796 66.0599   2
   1  -4 -22 353.224 81.9553   3
   1   4 -22 268.668 65.3231   3
   1   4 -22 412.024 50.4770   2
  -1   4  21 6.87925 43.4101   2
   1  -4 -21 169.803 50.4092   4
   1   4 -21 121.162 54.5503   3
   1  -4 -21 130.905 62.8103   3
  -1  -4  21 201.931 65.5119   1
   1   4 -21 181.671 40.9172   2
   1   4 -21 230.725 53.8068   4
   1  -4 -20 581.304 71.8810   4
   1   4 -20 468.988 69.1292   4
   1   4 -20 481.719 74.3450   3
  -1   4  20 427.016 72.0388   2
  -1  -4  20 598.857 85.2741   1
   1   4 -20 563.173 58.4521   2
  -1   4  19 223.710 64.6104   2
   1   4 -19 249.770 43.9611   2
   1   4 -19 215.947 57.4336   3
   1  -4 -19 310.130 58.2702   4
  -1   4  19 317.328 71.0538   3
  -1  -4  19 295.497 64.3892   1
  -1   4  18 152.459 54.9868   2
  -1  -4  18 195.655 58.9802   1
   1   4 -18 152.585 41.3454   2
   1  -4 -18 179.913 45.3217   4
  -1   4  18 234.258 61.3080   3
   1   4 -18 193.727 55.8473   3
  -1  -4  17 19.8616 50.7206   1
  -1   4  17 13.6574 48.3173   3
   1   4 -17 55.9306 33.3835   2
  -1  -4  17-24.3896 44.2465   4
   1  -4 -17 29.5250 39.8132   4
  -1   4  17-28.7367 40.5154   2
   1   4 -17 7.63543 41.0263   3
   1  -4 -16 108.128 40.2365   4
   1   4 -16 84.6495 33.5489   2
  -1  -4  16 130.648 52.6849   1
  -1  -4  16 41.0912 43.9458   4
  -1   4  16 112.791 55.5846   3
   1   4 -16 46.5506 43.4187   3
  -1   4  16 44.7485 41.7662   2
  -1   4  15 489.078 69.8143   2
  -1  -4  15 527.310 76.0944   4
  -1  -4  15 563.003 76.1081   1
  -1   4  15 586.450 81.1121   3
   1   4 -15 533.710 78.9756   3
   1  -4 -15 545.526 66.5214   4
   1   4 -15 506.566 56.3575   2
   1  -4 -14 621.437 70.7596   4
   1   4 -14 451.987 56.6487   2
  -1  -4  14 553.827 81.6551   4
  -1  -4  14 621.783 74.8201   1
  -1   4  14 660.461 84.4804   3
   1   4 -14 634.560 81.2234   3
  -1   4  14 726.233 83.3364   2
  -1   4  13 94.5834 45.9540   3
  -1   4  13 35.5120 42.0059   2
   1   4 -13-25.6537 44.7501   3
   1   4 -13 9.06597 28.1912   2
   1  -4 -13 20.4091 34.1961   4
  -1  -4  13 39.1570 37.5342   1
  -1  -4  13 136.615 51.8547   4
  -1   4  12 279.182 65.5295   3
  -1   4  12 252.758 52.9102   2
   1   4 -12 168.483 37.3158   2
  -1  -4  12 208.464 48.0925   1
   1  -4 -12 211.191 50.0013   4
   1   4 -12 242.355 53.2543   3
  -1  -4  12 227.083 56.7130   4
  -1  -4  11 1400.66 113.260   4
  -1  -4  11 1323.64 97.6628   1
   1  -4 -11 1311.97 97.4134   4
  -1   4  11 1370.02 98.0753   2
   1   4 -11 1178.14 74.2781   2
  -1   4  11 1242.74 105.888   3
   1   4 -11 1011.31 93.8821   3
   1  -4 -10 106.068 38.6376   4
  -1   4  10 33.6853 37.8662   3
   1   4 -10 104.731 34.8828   2
  -1  -4  10 58.5351 39.8854   1
  -1  -4  10 93.6884 47.4639   4
  -1   4  10 131.635 43.6495   2
   1   4 -10 170.138 57.9549   3
   1  -4  -9 14.4967 36.8613   4
   1   4  -9-11.4091 38.0005   3
  -1   4   9-17.0121 44.1433   3
  -1   4   9-16.8672 33.3057   2
  -1  -4   9 19.9888 40.0469   4
  -1  -4   9 0.45043 33.7825   1
   1   4  -9-18.0347 30.6426   2
   1   4  -8 84.1211 33.9580   2
  -1   4   8 29.9251 31.7893   2
  -1   4   8 83.5269 42.8550   3
   1  -4  -8 111.847 42.6332   4
  -1  -4   8 64.4877 36.6258   1
  -1  -4   8 109.131 51.7531   4
   1   4  -8 116.879 48.0188   3
  -1   4   7 335.117 59.9730   3
   1   4  -7 337.624 46.7856   2
  -1  -4   7 316.981 62.1579   4
  -1  -4   7 308.876 50.2026   1
  -1   4   7 264.169 46.4227   2
   1  -4  -7 249.079 52.3327   4
   1   4  -7 146.896 47.2572   3
  -1   4   6 895.870 71.6730   2
  -1  -4   6 938.941 89.1017   4
   1  -4  -6 814.089 33.5020   1
   1   4  -6 1050.56 72.2659   2
  -1  -4   6 952.837 76.4614   1
   1  -4  -6 1077.98 90.7163   4
   1   4  -6 954.366 94.0984   3
   1  -4  -6 670.305 32.2347   1
  -1   4   6 944.854 87.1638   3
  -1  -4   5 2482.22 135.463   4
   1   4  -5 2520.14 108.123   2
   1   4  -5 2605.39 140.762   3
   1  -4  -5 2667.16 136.740   4
  -1  -4   5 2525.25 118.151   1
   1  -4  -5 2315.94 62.4142   1
  -1   4   5 2658.82 111.893   2
   1  -4  -5 2308.34 62.4971   1
  -1   4   5 2576.86 136.757   3
   1  -4  -4 2145.23 65.1170   1
   1  -4  -4 2276.00 127.748   4
  -1   4   4 2366.68 129.600   3
  -1   4   4 2162.00 97.3932   2
  -1  -4   4 2088.40 106.711   1
   1   4  -4 2138.51 101.093   2
  -1  -4   4 2155.71 124.110   4
   1  -4  -4 1947.88 64.3224   1
   1   4  -4 2204.15 126.511   3
  -1  -4   3 1488.96 109.460   4
  -1   4   3 1330.79 75.5089   2
   1   4  -3 1162.11 100.750   3
   1   4  -3 1256.65 81.4199   2
  -1   4   3 1313.44 104.474   3
   1  -4  -3 1272.11 54.6656   1
  -1  -4   3 1264.69 83.2844   1
   1  -4  -3 1400.73 104.151   4
  -1   4   2 2491.77 97.1701   2
   1  -4  -2 2466.28 78.8428   1
   1   4  -2 2736.55 117.118   2
  -1  -4   2 2447.78 132.940   4
  -1   4   2 2587.21 135.055   3
  -1  -4   2 2464.74 109.404   1
   1   4  -2 2496.27 134.448   3
   1  -4  -2 2520.52 134.038   4
   1   4  -1 578.122 63.2886   2
  -1   4   1 707.540 55.0134   2
  -1  -4   1 632.995 61.6707   1
   1   4  -1 607.406 75.5189   3
   1  -4  -1 817.268 89.0710   4
  -1   4   1 631.742 73.3601   3
   1  -4  -1 710.695 49.4653   1
  -1  -4   1 720.583 80.3420   4
  -1   4   0 4814.18 125.302   2
   1   4   0 3820.61 142.752   2
   1   4   0 3589.33 160.759   3
  -1  -4   0 4207.37 171.603   4
  -1  -4   0 3811.01 132.492   1
   1  -4   0 4693.19 122.662   1
  -1   4   0 4608.74 185.640   3
   1  -4   0 5040.74 193.629   4
   1  -4   1 23167.4 275.976   1
   1   4   1 22627.2 386.863   3
   1   4   1 23597.4 345.199   2
   1  -4   1 24002.8 407.168   4
  -1  -4  -1 23587.8 397.317   4
  -1  -4  -1 23538.7 316.716   1
  -1   4  -1 23685.6 258.523   2
  -1   4  -1 24075.9 397.117   3
   1  -4   2 2052.11 133.220   4
   1   4   2 2661.19 127.331   2
  -1   4  -2 1919.05 119.275   3
  -1  -4  -2 2575.49 107.214   1
   1  -4   2 1954.50 87.2139   1
  -1  -4  -2 2757.28 144.478   4
  -1   4  -2 1899.17 72.4381   2
   1   4   2 2564.36 136.716   3
   1   4   3 3804.59 145.305   2
  -1   4  -3 3694.26 91.8233   2
   1  -4   3 3751.20 121.507   1
  -1  -4  -3 3813.07 165.365   4
   1   4   3 3566.58 161.653   3
  -1   4  -3 3753.27 161.866   3
   1  -4   3 3628.67 169.598   4
  -1  -4  -3 3718.75 123.578   1
  -1  -4  -4 1154.70 71.1494   1
   1   4   4 1211.69 91.0370   2
  -1  -4  -4 1350.43 104.396   4
   1  -4   4 1203.67 103.141   4
   1  -4   4 1052.74 70.4187   1
  -1   4  -4 1144.30 94.8718   3
   1   4   4 1197.84 95.8393   3
   1  -4   4 888.664 47.1363   2
  -1   4  -4 1029.17 46.3712   2
  -1  -4  -5 60.2968 28.2220   1
   1   4   5 95.7302 46.4194   3
  -1  -4  -5 160.211 53.7234   4
   1  -4   5 121.553 58.3733   4
   1  -4   5 78.8199 19.8096   2
  -1   4  -5 86.3056 19.9524   2
   1  -4   5 96.2544 36.0532   1
  -1   4  -5 143.664 53.5376   3
   1   4   5 114.987 48.3312   2
   1  -4   6 3659.36 135.037   1
   1   4   6 3547.38 148.210   2
  -1  -4  -6 3589.30 161.985   4
  -1  -4  -6 3728.24 117.120   1
  -1   4  -6 3838.80 164.567   3
   1   4   6 3496.98 154.009   3
   1   4   7 3682.44 153.660   2
  -1   4  -7 3795.66 162.815   4
  -1  -4  -7 3698.79 167.490   4
  -1   4  -7 3782.97 163.366   3
  -1  -4  -7 3775.16 117.439   1
   1   4   7 3707.32 159.986   3
   1  -4   7 3663.41 137.920   1
  -1   4  -8 248.952 55.6675   3
  -1  -4  -8 267.530 62.6498   4
   1  -4   8 297.901 52.0032   1
   1   4   8 268.852 60.7895   3
   1   4   8 308.385 59.4541   2
  -1  -4  -8 256.435 38.2261   1
  -1   4  -8 252.943 55.2000   4
   1   4   9 77.8332 40.6797   3
  -1   4  -9 0.08250 36.9325   4
  -1  -4  -9 49.3808 43.8159   4
   1  -4   9 96.2742 42.3226   1
  -1  -4  -9 93.0025 27.4313   1
  -1   4  -9 83.9621 43.2078   3
   1   4   9 80.4637 42.3431   2
  -1  -4 -10 185.188 49.6852   4
  -1   4 -10 202.817 51.4232   4
  -1  -4 -10 179.421 32.2925   1
  -1   4 -10 289.581 61.4893   3
   1   4  10 217.886 55.7128   2
   1   4  10 215.641 48.5995   3
   1  -4  10 141.893 40.6521   1
   1  -4  11 494.738 64.2381   1
  -1  -4 -11 724.297 84.4020   4
  -1   4 -11 581.277 76.8787   4
  -1   4 -11 663.716 78.7618   3
   1   4  11 628.678 76.8682   2
  -1  -4 -11 631.924 49.8583   1
   1   4  11 612.405 71.3420   3
  -1  -4 -12 155.281 54.4956   4
   1   4  12 55.5251 45.3433   2
  -1   4 -12 118.729 46.0750   3
   1  -4  12 127.724 46.7574   1
  -1  -4 -12 65.0755 26.4331   1
  -1   4 -12 27.7877 39.5537   4
   1   4  12 63.4884 43.5556   3
   1  -4  13 773.510 78.4768   1
   1   4  13 788.657 82.5058   3
  -1  -4 -13 774.103 82.9212   4
   1   4  13 788.307 84.5212   2
  -1  -4 -13 971.676 59.0474   1
  -1   4 -13 921.409 90.4051   3
  -1   4 -13 615.313 75.8577   4
  -1   4 -14 124.601 51.8787   3
  -1  -4 -14 109.479 27.0171   1
   1   4  14 119.488 45.1113   3
  -1  -4 -14 145.780 47.9128   4
   1   4  14 82.5359 42.7863   2
  -1   4 -14 108.688 52.5835   4
   1  -4  14 107.783 46.4425   1
   1   4  15 75.3009 43.5670   3
   1   4  15 72.4413 45.2077   2
  -1  -4 -15 52.0553 40.9019   4
  -1   4 -15 18.1992 40.5516   4
  -1   4 -15 125.900 51.7880   3
  -1  -4 -15 44.1391 26.6031   1
   1  -4  15 51.6315 46.1851   1
   1   4  16 85.0999 43.5679   3
  -1   4 -16 153.044 53.4972   4
  -1  -4 -16 143.915 48.2341   4
   1   4  16 142.476 53.1873   2
   1  -4  16 160.612 54.3550   1
  -1  -4 -16 112.685 28.2652   1
  -1   4 -16 141.848 52.9986   3
  -1  -4 -17 55.2179 45.8460   4
   1   4  17 22.4032 37.4573   3
  -1   4 -17-7.51769 39.8488   4
  -1  -4 -17-3.73913 23.1764   1
   1   4  17 113.614 59.6695   2
   1  -4  17 50.4356 44.7587   1
  -1   4 -17 19.0304 39.8105   3
  -1  -4 -18 354.337 69.0717   4
  -1   4 -18 273.126 60.2915   4
   1  -4  18 417.507 73.0998   1
   1   4  18 433.278 77.1680   2
   1   4  18 279.702 40.0830   1
  -1   4 -18 370.844 64.7072   3
   1   4  18 351.586 70.5749   3
  -1   4 -19 102.555 50.0894   3
   1   4  19 20.3351 27.4422   1
   1  -4  19 33.1009 51.9599   1
  -1  -4 -19 47.1526 41.5627   4
  -1   4 -19-19.3471 46.1288   4
   1   4  19-24.1507 46.3129   2
   1   4  19 42.8088 41.9004   3
   1   4  20 189.449 35.2862   1
   1  -4  20 153.277 52.8240   1
   1   4  20 214.324 59.1345   3
   1   4  20 190.628 65.4741   2
  -1   4 -20 182.481 61.6670   4
  -1  -4 -20 238.927 60.9820   4
  -1   4 -20 161.107 51.6463   3
   1   4  21 1078.18 66.6556   1
  -1  -4 -21 1278.98 115.495   4
  -1   4 -21 1123.41 107.024   4
   1  -4  21 1039.86 107.018   1
   1   4  21 1222.02 121.470   2
  -1   4 -21 1289.63 113.208   3
   1   4  21 1206.37 111.313   3
  -1   4 -22 481.392 81.6373   4
   1   4  22 294.255 68.5263   3
  -1  -4 -22 297.448 67.8870   4
  -1   4 -22 421.454 75.0555   3
   1  -4  22 402.701 81.8637   1
   1   4  22 295.505 42.5097   1
   1   4  22 294.949 70.1456   2
   1   4  23 106.428 50.2116   3
  -1  -4 -23 52.8357 47.6046   4
  -1   4 -23 17.2306 48.9304   4
   1   4  23 170.015 68.8833   2
  -1   4 -23 128.870 57.2568   3
   1  -4  23 52.1858 52.9329   1
   1   4  23 96.0534 36.4982   1
   1   4  24 174.111 40.0847   1
   1   4  24 179.538 62.4503   2
   1  -4  24 147.421 62.5172   1
  -1   4 -24 287.480 71.2074   4
  -1   4 -24 184.123 61.2037   3
  -1  -4 -24 168.336 57.3755   4
   1   4  25 318.478 48.9711   1
  -1   4 -25 413.634 76.0130   4
  -1  -4 -25 219.818 70.3155   3
   1  -4  25 255.109 71.3953   1
   1   4  25 288.078 75.0778   2
  -1   4 -25 346.966 73.0070   3
  -1  -4 -25 429.216 83.6407   4
  -1  -4 -26 671.182 98.7843   4
   1   4  26 602.839 99.1289   2
  -1   4 -26 754.017 97.7930   4
   1   4  26 547.493 59.1400   1
  -1  -4 -26 505.852 87.2788   3
  -1   4 -26 626.529 85.9447   3
   1  -4  26 460.737 83.9637   1
  -1   4 -27 75.9087 56.7231   3
  -1   4 -27 107.151 58.0805   4
   1   4  27 54.2168 56.1699   2
   1   4  27 26.7718 30.8046   1
  -1  -4 -27 117.840 59.7774   4
  -1  -4 -27 118.846 67.3022   3
   1  -4  27 101.890 63.1766   1
  -1   4 -28 418.265 81.4685   3
   1   4  28 352.523 92.9589   2
  -1  -4 -28 473.843 87.5041   4
  -1   4 -28 445.697 79.7016   4
  -1  -4 -28 636.897 97.9357   3
   1  -4  28 413.924 87.8016   1
   1   4  29 527.354 107.783   2
  -1   4 -29 590.739 92.1335   4
   1  -4  29 426.695 91.8932   1
  -1  -4 -29 556.509 101.873   3
  -1   4 -29 548.461 90.2166   3
  -1  -4 -29 579.174 96.5584   4
  -1  -4 -30 47.3638 62.9946   3
  -1   4 -30 68.9586 57.2587   4
   1   4  30 42.9803 69.3423   2
  -1  -4 -30-12.9134 53.2108   4
   1  -4  30-18.1520 63.8087   1
  -1   4 -30 31.2628 49.3036   3
  -1   4 -31 540.893 89.6818   4
   1  -4  31 479.918 103.196   1
  -1  -4 -31 472.449 96.7408   3
  -1  -4 -31 472.357 85.3182   4
   1   4  31 522.750 108.920   2
  -1   4 -31 518.687 85.4966   3
  -1  -4 -32 94.4633 63.8215   4
   1   4  32 56.1667 66.8885   2
   1  -4  32 169.060 79.3790   1
  -1   4 -32 70.0718 54.0931   4
  -1  -4 -32 128.726 70.2918   3
  -1   4 -32 179.859 68.9247   3
   1  -4  33 1025.55 131.918   1
  -1  -4 -33 899.504 131.017   3
  -1   4 -33 1010.82 118.672   3
   1   4  33 885.816 132.820   2
  -1   4 -33 954.371 120.050   4
  -1  -4 -33 799.903 110.093   4
  -1  -4 -34 78.0017 68.5534   4
  -1  -4 -34 86.2728 75.3016   3
  -1   4 -34 116.839 66.8841   4
   1   4  34 201.074 95.4897   2
   1  -4  34 12.0178 62.6269   1
  -1   4 -34 129.997 70.4576   3
  -1  -4 -35-4.67319 58.1003   4
  -1  -4 -35-89.4919 77.3697   3
   1   4  35 131.803 79.8898   2
   1  -4  35-80.6896 68.2185   1
  -1   4 -35 106.018 61.5259   3
  -1   4 -35 55.0527 55.9870   4
  -1   4 -36 42.9322 61.4122   4
  -1  -4 -36-30.6557 63.3302   4
  -1  -4 -36-19.0416 64.7138   3
   1   4  36-92.9694 85.3755   2
   1  -4  36 140.781 79.9361   1
  -1   4 -36-40.3505 60.6450   3
  -1  -4 -37 29.2637 65.7138   3
  -1  -4 -37 40.2614 68.3805   4
   1   4  37 130.530 77.7441   2
   1  -4  37-48.6525 67.3247   1
  -1   4 -37 44.6976 62.2029   4
  -1   4 -37-93.0129 64.0246   3
  -1   4 -38 113.039 67.4193   3
   1   4  38 226.426 96.1131   2
  -1  -4 -38 49.7644 65.4197   4
  -1   4 -38 86.0219 61.7490   4
  -1  -4 -38-24.6853 66.8105   3
   1  -4  38 189.768 83.9611   1
   1   4  39 492.455 118.680   2
  -1  -4 -39 578.056 109.917   4
  -1   4 -39 434.312 94.6919   4
  -1  -4 -39 448.320 101.276   3
   1  -4  39 564.532 119.886   1
  -1   4 -39 378.012 89.2382   3
   1   4  40 437.472 118.407   2
  -1  -4 -40 428.830 106.620   3
  -1  -4 -40 405.904 99.5718   4
  -1   4 -40 360.300 92.1504   4
  -1   4 -40 297.405 86.3458   3
   1  -4  40 351.836 101.860   1
  -1  -4 -41 43.4846 77.5983   4
   1   4  41 233.190 94.6546   2
  -1   4 -41 193.598 79.0527   4
  -1  -4 -41-71.8235 82.6696   3
   1  -4  41 73.3446 73.0138   1
  -1   4 -41 16.0263 61.7828   3
  -1  -4 -42 135.358 84.9813   4
  -1   4 -42 41.8302 69.7651   4
  -1   4 -42 68.4721 64.4017   3
  -1  -4 -42 70.5585 83.0084   3
   1  -4  42 44.1503 74.0840   1
   1   4  42 9.00960 78.7315   2
   1  -4  43-16.0466 79.0899   1
  -1  -4 -43-41.2225 72.6726   4
  -1   4 -43-13.9289 64.1673   4
   1   4  43 87.7253 90.7323   2
  -1   4 -43 7.08712 59.2828   3
  -1  -4 -43 132.474 83.4217   3
  -1   4 -44 69.4678 68.3566   4
  -1   4 -44 60.6935 60.3607   3
  -1  -4 -44 316.911 100.122   4
   1   4  44 93.3390 99.2833   2
  -1  -4 -44 142.824 88.3390   3
   1  -4  44 195.221 100.630   1
  -1  -4 -45 181.647 89.9813   4
  -1   4 -45-22.2831 64.6966   4
  -1  -4 -45 155.563 89.3372   3
  -1   4 -45 41.4885 70.2482   3
   1   4  45 74.7348 93.4188   2
   1  -4  45-8.05152 77.4227   1
  -1  -4 -46-3.02982 70.8819   3
  -1   4 -46 26.8131 63.6300   4
   1   4  46 169.968 99.3098   2
   1  -4  46 36.2853 85.2243   1
  -1  -4 -46 93.9524 78.0751   4
  -1   4 -46-70.1211 63.2809   3
  -1  -4 -47-59.1113 89.9523   4
  -1   4 -47-70.4538 67.7207   4
   1  -4  47 207.180 106.852   1
  -1   4 -47 9.97932 67.2705   3
  -1  -4 -47 88.8812 79.9471   3
   1   4  47 115.468 105.909   2
  -1   4 -48 65.2855 78.6226   4
  -1  -4 -48 276.221 103.225   4
  -1  -4 -48 141.123 88.8144   3
   1   4  48 214.896 113.420   2
   1  -4  48 84.4235 81.0673   1
  -1   4 -48 167.098 86.2746   3
   1   4  49-6.26584 92.7239   2
  -1  -4 -49 108.246 92.2640   4
   1  -4  49 144.451 95.4101   1
  -1   4 -49-41.1011 69.8249   4
  -1  -4 -49 86.3647 91.7002   3
  -1   4 -49-28.1092 63.5581   3
  -1   4 -50 53.9291 76.6750   4
  -1  -4 -50 118.212 92.4411   4
   1   4  50 87.5462 104.796   2
  -1  -4 -50-6.74654 85.2975   3
   1  -4  50 65.8022 92.3575   1
   1  -4  51-2.63724 90.0180   1
  -1   4 -51-39.7891 74.8704   4
  -1  -4 -51-24.2663 79.9192   3
  -1  -4 -51-14.2926 77.2857   4
   1   4  51-38.3785 91.1851   2
  -1   4 -52 51.5711 78.5838   4
  -1  -4 -52 52.7935 90.0232   4
  -1   4 -53 45.1111 76.2877   4
  -1  -4 -53 144.232 97.5627   4
  -1  -4 -54-21.9026 85.6284   4
   1   5 -50-112.180 97.2567   3
   1  -5 -49-130.805 103.665   3
   1   5 -49 97.0557 86.4790   3
  -1  -5  48 125.016 107.888   1
   1  -5 -48 91.8628 89.1021   3
   1   5 -48-30.4388 71.8825   3
  -1   5  48 151.801 110.301   2
   1   5 -47-39.2883 62.8650   4
   1   5 -47-13.3073 73.3246   3
   1  -5 -47-93.0279 93.3534   3
  -1  -5  47 51.7101 92.7424   1
  -1   5  47-42.3505 87.4621   2
   1  -5 -46-20.7430 92.4796   3
   1   5 -46 17.8148 60.1007   4
  -1  -5  46 88.0702 89.1432   1
  -1   5  46 63.1713 91.9220   2
   1   5 -46-93.3797 76.4306   3
   1  -5 -45 19.0755 81.3688   3
   1   5 -45 112.753 72.5377   4
  -1  -5  45 45.1374 95.3798   1
  -1   5  45 157.654 109.062   2
   1   5 -45-116.616 80.1037   3
  -1   5  44-73.9586 96.8092   2
   1  -5 -44 3.24251 83.1798   3
   1   5 -44-74.7990 65.2899   4
  -1  -5  44 36.5470 86.6878   1
   1   5 -44 16.3461 71.5786   3
  -1  -5  43 28.8289 90.6281   1
  -1   5  43 58.1699 78.9114   2
   1   5 -43 32.4100 57.2924   4
   1   5 -43 30.6327 68.3226   3
   1  -5 -43 188.863 99.4386   3
  -1  -5  42-69.0807 77.5205   1
   1  -5 -42 100.899 83.9137   3
  -1   5  42 16.3349 76.7143   2
   1   5 -42 159.351 86.9155   3
   1   5 -42-34.4698 61.6391   4
   1  -5 -42-12.5715 62.8586   4
  -1  -5  41 60.0811 89.2984   1
   1  -5 -41-174.977 101.208   3
   1   5 -41-29.0863 63.1642   4
   1  -5 -41 36.6297 62.9833   4
  -1   5  41 51.4180 69.1970   2
   1   5 -41-85.4419 68.0989   3
   1  -5 -40-116.917 92.3468   3
   1  -5 -40 114.039 66.2698   4
  -1  -5  40 28.7015 75.8979   1
   1   5 -40 154.488 82.1308   3
  -1   5  40-60.9870 78.1412   2
   1   5 -40 37.6735 60.3784   4
  -1  -5  39 122.771 77.5965   1
   1   5 -39 133.700 80.3648   3
   1  -5 -39 91.3657 94.3590   3
   1   5 -39 39.6047 54.1753   4
   1  -5 -39 48.6998 70.7077   4
  -1   5  39-130.046 92.6717   2
   1  -5 -38 68.2384 64.1198   4
   1   5 -38 28.5459 52.7009   4
  -1  -5  38-25.5601 71.7070   1
  -1   5  38-33.3765 69.5258   2
   1  -5 -38 146.014 90.7234   3
   1   5 -38 47.8223 68.1457   3
   1  -5 -37 19.6783 78.9460   3
   1  -5 -37-100.294 67.2238   4
  -1   5  37 4.90164 68.1529   2
  -1  -5  37 120.534 82.2449   1
   1   5 -37 201.927 87.7456   3
   1   5 -37 91.3170 55.4556   4
   1  -5 -36-20.1770 54.7655   4
   1  -5 -36 116.437 94.8590   3
   1   5 -36 11.1205 50.5364   4
   1   5 -36 57.3233 67.4401   3
  -1  -5  36 14.0687 64.6861   1
  -1   5  36 142.235 80.6181   2
   1   5 -35-71.0186 72.5389   3
   1   5 -35-27.5495 51.5403   4
   1  -5 -35-23.6007 77.6969   3
  -1   5  35 75.2514 82.5921   2
  -1  -5  35 34.3663 71.6869   1
   1  -5 -35-36.9962 53.9931   4
  -1  -5  34 500.082 106.811   1
   1   5 -34 363.346 80.8569   4
   1  -5 -34 309.208 76.5316   4
   1  -5 -34 232.613 96.1940   3
  -1   5  34 351.910 96.8465   2
   1   5 -34 354.319 87.7820   3
  -1  -5  33 230.640 88.1925   1
   1   5 -33 173.009 72.3890   3
   1  -5 -33 221.906 92.3537   3
   1  -5 -33 247.512 75.0672   4
  -1   5  33 142.334 72.6390   2
   1   5 -33 197.920 68.9936   4
  -1  -5  32 154.837 75.6644   1
   1   5 -32 195.031 70.1084   4
   1  -5 -32-3.98506 78.3796   3
   1  -5 -32 143.443 62.9271   4
   1   5 -32 267.179 82.7906   3
   1   5 -31 152.389 67.2984   4
  -1  -5  31 130.561 74.6677   1
  -1   5  31-12.8473 65.4414   2
   1  -5 -31 206.343 75.1296   4
   1   5 -31 17.6098 54.7906   3
   1  -5 -31-124.028 81.6943   3
  -1  -5  30 474.767 98.4624   1
   1   5 -30 674.976 100.160   4
   1   5 -30 600.197 103.165   3
   1  -5 -30 562.256 115.675   3
   1  -5 -30 571.322 92.8547   4
  -1   5  30 659.343 112.290   2
  -1  -5  29 203.471 73.7254   1
   1  -5 -29 153.030 60.9106   4
   1  -5 -29 252.402 93.1755   3
   1   5 -29 178.324 63.2629   4
  -1   5  29 233.052 71.2680   2
   1   5 -29 150.861 65.5524   3
  -1  -5  28 21.6332 56.4743   1
   1  -5 -28 212.143 89.5383   3
  -1   5  28 57.3879 54.5051   2
   1  -5 -28 70.3811 60.7941   4
   1   5 -28 93.7461 60.1560   3
   1   5 -28 118.522 56.0912   4
   1  -5 -27 171.010 81.7810   3
   1  -5 -27 250.476 62.6832   4
  -1   5  27 334.440 81.6421   2
  -1  -5  27 298.255 89.0507   1
   1   5 -27 313.042 81.4753   3
   1   5 -26 131.872 68.0424   3
  -1  -5  26 338.715 81.4873   1
   1  -5 -26 173.129 85.6283   3
  -1   5  26 305.351 75.0921   2
   1  -5 -26 267.733 70.2145   4
  -1  -5  25 122.824 65.0061   1
  -1  -5  25 67.0849 61.6486   4
   1  -5 -25 93.5596 55.3517   4
   1  -5 -25 32.1689 63.1835   3
  -1   5  25 79.9704 65.2424   2
   1   5 -25 111.880 64.1630   3
  -1  -5  24 71.7001 54.4948   1
  -1  -5  24 37.8559 55.0945   4
   1  -5 -24 22.1942 48.4341   4
   1  -5 -24 138.178 84.3886   3
   1   5 -24 110.031 60.0531   3
  -1   5  24 111.187 62.8176   2
  -1   5  23 1051.89 117.925   2
   1   5 -23 881.084 110.442   3
  -1  -5  23 926.768 120.132   4
   1  -5 -23 1026.33 102.580   4
  -1  -5  23 981.285 113.173   1
   1  -5 -22 1083.09 104.517   4
  -1   5  22 1055.92 122.243   3
  -1  -5  22 986.697 122.408   4
  -1   5  22 950.306 111.013   2
   1   5 -22 1028.13 114.236   3
  -1  -5  22 965.251 111.429   1
  -1  -5  21 21.3526 46.9596   1
  -1   5  21 63.7265 56.0324   3
  -1  -5  21 5.38980 57.0387   4
  -1   5  21 70.1280 51.9002   2
   1   5 -21 61.5201 59.6001   3
   1  -5 -21 24.8373 42.6467   4
  -1  -5  20 27.9984 48.1720   1
  -1  -5  20 97.6255 57.7658   4
  -1   5  20 85.6212 53.0550   2
   1  -5 -20 79.0935 48.5004   4
  -1   5  20 128.568 65.8238   3
   1   5 -20 68.1064 49.8850   3
  -1  -5  19 232.234 75.8792   4
  -1  -5  19 95.5354 53.5682   1
  -1   5  19 88.3452 64.1200   3
   1  -5 -19 56.0655 46.4186   4
   1   5 -19 78.5656 47.9464   3
  -1   5  19 40.6951 51.8694   2
   1   5 -19 74.7479 33.3071   2
   1   5 -18 143.161 37.0797   2
  -1   5  18 188.773 70.5634   3
  -1  -5  18 110.929 47.0886   1
   1  -5 -18 184.542 53.8423   4
  -1  -5  18 168.798 64.0896   4
  -1   5  18 225.068 65.4188   2
   1   5 -18 130.052 56.5056   3
  -1  -5  17 132.789 60.1441   4
  -1   5  17 97.7817 60.4566   3
   1  -5 -17 143.587 47.6497   4
   1   5 -17 133.137 35.5763   2
  -1  -5  17 199.350 61.0579   1
  -1   5  17 252.022 64.6397   2
   1   5 -17 86.6705 55.0246   3
   1  -5 -16 24.2277 40.7338   4
  -1   5  16 62.1187 50.8804   3
  -1  -5  16 72.1931 51.0997   1
  -1  -5  16 199.761 67.4785   4
  -1   5  16 20.8972 40.0308   2
   1   5 -16 39.4197 27.2615   2
   1   5 -16 72.1621 52.7682   3
  -1   5  15 23.0346 47.2059   3
  -1  -5  15-10.0377 39.6389   1
   1  -5 -15 30.6891 45.0822   4
  -1  -5  15 43.6821 50.8500   4
   1   5 -15 32.7096 48.3894   3
   1   5 -15 25.4377 28.8966   2
  -1   5  15 62.7125 41.8038   2
  -1   5  14 402.566 78.3568   3
   1   5 -14 335.761 73.4049   3
   1  -5 -14 336.076 63.6779   4
  -1  -5  14 215.505 65.3875   4
   1   5 -14 371.277 46.7267   2
  -1   5  14 400.077 69.7879   2
  -1  -5  14 330.013 67.9329   1
   1  -5 -13 620.141 84.1254   4
  -1   5  13 541.976 70.9601   2
  -1  -5  13 472.864 70.7594   1
  -1  -5  13 599.213 89.2917   4
  -1   5  13 660.099 96.9311   3
   1   5 -13 599.981 88.4691   3
   1   5 -13 512.016 54.1632   2
  -1   5  12 225.421 66.0978   3
  -1   5  12 272.710 58.0453   2
  -1  -5  12 253.310 67.9676   4
   1  -5 -12 265.052 64.5132   4
   1   5 -12 273.845 45.5054   2
  -1  -5  12 319.446 63.0129   1
   1   5 -12 243.206 65.5312   3
   1   5 -11 156.078 35.8146   2
  -1   5  11 116.465 53.2314   3
  -1  -5  11 108.846 47.0232   1
   1  -5 -11 146.553 50.5374   4
   1   5 -11 26.7776 48.2364   3
  -1  -5  11 180.578 62.5896   4
  -1   5  11 161.054 52.2660   2
  -1  -5  10 19.7092 42.8582   1
   1   5 -10 70.5472 32.9659   2
   1  -5 -10 45.2062 47.9751   4
  -1   5  10 38.8901 43.6289   3
  -1  -5  10 9.00081 48.0447   4
   1   5 -10 62.7463 45.7601   3
  -1   5  10-27.8639 36.5654   2
  -1  -5   9 409.743 75.2991   4
  -1  -5   9 352.845 62.8337   1
  -1   5   9 369.385 62.6579   2
   1   5  -9 478.812 55.0745   2
  -1   5   9 346.492 64.6112   3
   1  -5  -9 473.853 73.5497   4
   1   5  -9 393.588 73.2068   3
  -1  -5   8 625.713 72.2648   1
  -1  -5   8 623.697 86.1230   4
   1  -5  -8 644.786 81.2833   4
   1   5  -8 709.448 89.9792   3
   1   5  -8 665.667 60.8536   2
  -1   5   8 523.596 64.5762   2
  -1   5   8 558.811 77.7761   3
  -1  -5   7 112.899 52.4531   4
   1  -5  -7 123.172 54.7653   4
   1  -5  -7 52.8870 11.6039   1
  -1   5   7 28.3350 35.7853   2
   1   5  -7 94.9694 48.5845   3
  -1  -5   7 124.796 46.8085   1
   1   5  -7 46.1937 33.1128   2
  -1   5   7 37.1171 44.1686   3
   1  -5  -6 62.6983 44.1692   4
  -1  -5   6 18.6799 44.9061   4
   1   5  -6 7.33999 29.4600   2
  -1   5   6 64.9901 40.8971   3
  -1   5   6 45.8127 32.2176   2
   1  -5  -6 29.9247 13.5844   1
  -1  -5   6 37.3277 36.2544   1
   1   5  -6 26.2465 44.9753   3
  -1   5   5 92.0099 50.7738   3
   1  -5  -5 67.4992 47.7799   4
  -1  -5   5 69.2097 36.8725   1
  -1  -5   5 40.3741 41.3503   4
   1   5  -5 169.208 62.9873   3
  -1   5   5 71.7849 32.1172   2
   1  -5  -5 88.5469 19.9509   1
   1   5  -5 66.4422 31.4737   2
   1  -5  -4 431.584 71.6992   4
  -1  -5   4 320.366 53.2218   1
   1   5  -4 307.886 49.7844   2
   1   5  -4 320.321 62.6851   3
   1  -5  -4 335.708 33.3220   1
  -1   5   4 347.728 48.1222   2
  -1   5   4 381.171 71.5870   3
  -1  -5   4 339.970 66.8231   4
   1  -5  -3 132.288 26.1833   1
  -1   5   3 131.170 52.8205   3
   1   5  -3 116.590 38.3625   2
  -1  -5   3 159.344 57.4326   4
   1  -5  -3 44.3961 40.6223   4
  -1   5   3 163.111 39.0514   2
  -1  -5   3 230.375 50.3070   1
   1   5  -3 149.588 55.3318   3
  -1   5   2 165.813 54.4391   3
   1  -5  -2 25.1743 44.2352   4
  -1   5   2 120.460 36.4218   2
   1  -5  -2 79.5523 24.7863   1
  -1  -5   2 123.203 39.3505   1
   1   5  -2 138.867 37.6180   2
  -1  -5   2 97.0005 51.0514   4
   1   5  -2 128.413 56.1647   3
  -1   5   1 110.625 51.2984   3
   1   5  -1 183.054 43.2077   2
  -1  -5   1 219.338 44.5737   1
   1  -5  -1 111.930 49.6748   4
  -1   5   1 191.226 37.7361   2
  -1  -5   1 184.073 56.7322   4
   1  -5  -1 196.536 33.6545   1
   1   5  -1 144.273 50.0617   3
  -1   5   0 115.721 52.9131   3
  -1  -5   0 77.8285 45.4347   4
   1   5   0 85.2491 37.3792   2
   1  -5   0 141.616 58.3238   4
   1  -5   0 109.912 31.1951   1
  -1   5   0 122.179 33.5785   2
  -1  -5   0 109.948 36.9248   1
   1   5   0 146.088 53.7593   3
  -1  -5  -1 49.3719 45.9555   4
   1   5   1 89.6504 51.4537   3
   1   5   1 32.5739 38.4964   2
   1  -5   1-6.64733 42.2311   4
  -1   5  -1 43.3172 26.1893   2
  -1  -5  -1 50.4632 30.6375   1
   1  -5   1 44.1409 26.7409   1
  -1   5  -1 22.2952 43.3563   3
  -1   5  -2 494.968 44.3492   2
   1   5   2 534.689 65.7644   2
   1  -5   2 595.430 86.0732   4
  -1  -5  -2 491.181 77.3750   4
   1  -5   2 553.213 54.5755   1
  -1  -5  -2 601.094 60.0703   1
   1   5   2 461.842 73.1970   3
  -1   5  -2 542.677 77.5540   3
   1  -5   3 260.020 65.8597   4
   1   5   3 289.564 57.5092   2
  -1   5  -3 265.253 64.4240   3
  -1   5  -3 210.875 30.9392   2
  -1  -5  -3 257.884 62.4666   4
  -1  -5  -3 227.135 41.9054   1
   1   5   3 296.770 70.4757   3
   1  -5   3 158.119 35.9714   1
  -1   5  -4 227.172 58.1522   3
  -1  -5  -4 207.768 58.9887   4
   1  -5   4 266.310 70.5410   4
  -1   5  -4 195.932 29.0686   2
   1  -5   4 225.067 42.2944   1
  -1  -5  -4 226.060 42.4788   1
   1   5   4 248.670 55.9314   2
   1   5   4 151.917 49.8822   3
   1   5   5 291.262 60.5963   3
   1  -5   5 310.807 50.2117   1
   1   5   5 412.891 65.1813   2
  -1  -5  -5 275.576 62.3690   4
  -1   5  -5 270.805 60.3387   3
  -1   5  -5 246.363 24.9385   2
   1  -5   5 375.329 72.1441   4
  -1  -5  -5 394.098 48.9650   1
   1   5   6 125.150 50.0661   2
  -1   5  -6 164.866 56.9563   3
   1  -5   6 125.893 51.7766   4
  -1   5  -6 127.476 18.1310   2
  -1  -5  -6 173.778 55.9084   4
  -1  -5  -6 291.646 44.9590   1
   1   5   6 202.321 60.8495   3
   1  -5   6 262.851 50.5926   1
   1   5   7 40.8234 43.1530   3
  -1   5  -7-21.9963 48.3139   3
  -1  -5  -7 8.53190 43.0459   4
   1  -5   7 37.8280 54.6196   4
   1   5   7 107.359 50.5540   2
  -1  -5  -7 7.23835 24.8211   1
   1  -5   7 17.5513 29.6149   1
  -1   5  -7-4.12271 7.37697   2
   1   5   8 155.834 49.5714   3
  -1  -5  -8 361.559 46.9917   1
   1   5   8 329.074 64.1919   2
   1  -5   8 485.330 83.6291   4
  -1  -5  -8 314.994 70.8735   4
  -1   5  -8 349.047 69.4730   3
   1  -5   8 319.303 51.7508   1
  -1  -5  -9 145.894 34.4718   1
   1   5   9 120.955 51.4855   3
  -1  -5  -9 184.647 54.8241   4
   1   5   9 155.004 53.0092   2
   1  -5   9 166.978 48.1237   1
  -1   5  -9 141.678 53.2272   3
   1  -5   9 90.7875 56.8517   4
   1   5  10 120.601 51.1097   3
  -1  -5 -10 270.974 37.8144   1
   1  -5  10 280.226 71.5859   4
   1   5  10 199.461 57.7053   2
   1  -5  10 289.397 56.6152   1
  -1   5 -10 135.205 47.5472   3
  -1  -5 -10 267.868 63.1682   4
   1   5  11-1.58401 47.1831   3
  -1  -5 -11 71.0483 52.7244   4
   1   5  11 64.8189 47.6119   2
   1  -5  11-2.69881 42.2770   1
  -1  -5 -11-14.4990 26.0577   1
  -1   5 -11 39.8316 44.8195   3
   1   5  12 213.650 56.1880   3
  -1  -5 -12 240.913 66.0943   4
  -1  -5 -12 273.314 37.8854   1
   1   5  12 262.684 62.5766   2
  -1   5 -12 224.003 59.8247   4
   1  -5  12 160.949 52.0663   1
  -1   5 -12 313.465 68.0398   3
   1   5  13-4.07414 46.5176   2
  -1  -5 -13 42.9009 49.3123   4
  -1   5 -13-15.7025 48.4930   3
  -1  -5 -13-5.79561 22.0305   1
   1  -5  13-7.55543 45.3565   1
  -1   5 -13 15.7319 43.0074   4
   1   5  13 45.3701 45.4274   3
   1   5  14 216.546 57.3737   3
   1  -5  14 209.049 54.6831   1
  -1  -5 -14 308.036 38.2518   1
   1   5  14 187.429 59.6956   2
  -1   5 -14 235.916 60.6528   4
  -1  -5 -14 239.834 62.1489   4
  -1   5 -14 238.188 65.1706   3
   1   5  15 32.7258 50.5851   3
  -1  -5 -15 54.5660 24.9617   1
  -1  -5 -15 136.618 54.2414   4
   1   5  15 21.5455 52.9020   2
  -1   5 -15 42.7866 45.6428   4
   1  -5  15 39.4731 46.0252   1
  -1   5 -15 56.6184 46.1706   3
   1   5  16 158.391 58.8851   3
   1   5  16 177.443 63.1870   2
  -1   5 -16 154.241 62.0036   4
  -1  -5 -16 158.769 29.3070   1
  -1   5 -16 151.418 57.0375   3
   1  -5  16 128.842 56.3792   1
  -1  -5 -16 219.059 62.4223   4
   1   5  17 194.735 59.7588   3
   1  -5  17 115.913 51.5772   1
   1   5  17 102.202 60.8818   2
  -1  -5 -17 133.003 58.1812   4
  -1   5 -17 111.912 54.6287   4
  -1  -5 -17 69.2055 25.5268   1
  -1   5 -17 108.946 49.5940   3
   1   5  18 443.969 76.5285   3
  -1  -5 -18 348.604 78.6450   4
  -1   5 -18 501.170 83.9151   4
  -1   5 -18 392.164 77.9599   3
   1   5  18 356.215 80.7941   2
   1  -5  18 397.453 74.8580   1
   1   5  19 186.988 58.1119   3
  -1   5 -19 116.178 54.9026   4
   1   5  19 125.084 62.4667   2
   1  -5  19 210.345 59.9633   1
  -1   5 -19 262.327 72.7231   3
  -1  -5 -19 209.936 64.6877   4
   1   5  20 50.0345 48.7474   3
  -1  -5 -20-10.7315 46.7026   4
  -1   5 -20 102.908 58.1530   4
   1   5  20-6.45608 58.4906   2
   1  -5  20 62.0448 53.5055   1
  -1   5 -20 78.9800 53.4479   3
   1   5  21 156.894 62.3041   3
   1   5  21 144.941 66.6928   2
  -1   5 -21 218.531 66.4287   4
  -1  -5 -21 282.182 72.0004   4
   1  -5  21 252.070 66.9706   1
  -1   5 -21 194.206 67.0219   3
   1   5  22-8.02751 49.5682   3
   1   5  22-108.104 72.5899   2
  -1   5 -22 35.3721 52.4034   4
  -1  -5 -22 97.1725 56.6907   4
   1  -5  22 12.0633 50.9999   1
  -1   5 -22-53.2444 56.7379   3
   1   5  23 313.947 75.2609   3
  -1   5 -23 293.817 71.2497   4
   1   5  23 319.904 80.6511   2
  -1  -5 -23 239.726 66.2047   4
   1  -5  23 328.547 82.1142   1
  -1   5 -23 307.919 75.4299   3
  -1   5 -24 752.356 103.270   4
   1   5  24 805.619 119.240   2
  -1   5 -24 847.956 108.086   3
  -1  -5 -24 887.006 109.672   4
   1  -5  24 626.461 97.2709   1
   1   5  24 852.792 109.743   3
   1   5  25 64.0594 63.6924   2
  -1   5 -25 185.318 66.1822   4
  -1  -5 -25 103.180 63.7483   4
   1  -5  25 83.5920 61.1083   1
  -1   5 -25 106.189 57.3559   3
   1   5  25 142.946 62.5843   3
   1   5  26 477.691 94.6350   3
  -1  -5 -26 456.336 92.1656   4
   1   5  26 386.276 92.1620   2
  -1   5 -26 500.460 93.8239   4
   1  -5  26 548.769 97.2850   1
  -1   5 -26 332.023 78.7178   3
  -1   5 -27 234.289 69.7758   3
   1   5  27 228.270 79.9029   2
  -1   5 -27 352.694 75.0487   4
   1  -5  27 221.193 74.3522   1
  -1  -5 -27 250.406 72.8958   4
   1  -5  28 734.482 109.730   1
   1   5  28 908.541 127.726   2
  -1   5 -28 777.132 105.792   3
  -1   5 -28 763.306 106.216   4
  -1  -5 -28 950.305 123.232   4
  -1  -5 -28 704.975 120.915   3
  -1  -5 -29 313.745 80.2656   4
  -1  -5 -29 134.709 76.3223   3
  -1   5 -29 291.917 79.3518   3
   1   5  29 198.385 78.9683   2
   1  -5  29 228.452 77.8122   1
  -1   5 -29 266.040 82.0733   4
   1  -5  30 479.911 98.2376   1
  -1  -5 -30 313.359 85.9369   3
   1   5  30 362.510 98.9982   2
  -1   5 -30 423.057 90.1841   4
  -1  -5 -30 538.775 99.0859   4
  -1   5 -30 367.937 80.8218   3
   1   5  31 298.399 93.1431   2
  -1   5 -31 236.187 71.9706   4
  -1  -5 -31 509.563 104.301   4
  -1  -5 -31 436.655 101.013   3
  -1   5 -31 205.593 68.5224   3
   1  -5  31 456.486 103.938   1
  -1  -5 -32 269.181 76.9422   4
  -1   5 -32 138.972 65.6864   4
   1   5  32 110.532 80.0562   2
   1  -5  32 296.155 88.6451   1
  -1  -5 -32 176.264 82.7327   3
  -1   5 -32 233.758 75.3233   3
  -1  -5 -33 642.993 110.889   4
   1   5  33 381.480 106.579   2
  -1   5 -33 510.988 100.572   4
  -1  -5 -33 503.621 106.156   3
   1  -5  33 345.793 100.037   1
  -1   5 -33 553.646 94.4615   3
  -1  -5 -34 175.839 88.5508   3
  -1  -5 -34 82.4157 66.3256   4
   1   5  34 213.589 98.6641   2
  -1   5 -34 187.246 77.9851   3
  -1   5 -34 329.987 87.9394   4
   1  -5  34 282.801 85.4005   1
  -1   5 -35 198.402 78.0526   4
   1  -5  35 291.001 97.6134   1
  -1  -5 -35 75.9163 61.3419   4
   1   5  35 287.124 103.980   2
  -1  -5 -35 218.625 83.4668   3
  -1   5 -35 88.4693 63.5900   3
  -1  -5 -36 178.286 73.5479   4
  -1  -5 -36 249.724 99.2789   3
  -1   5 -36 175.939 80.9248   4
   1   5  36 321.627 108.339   2
   1  -5  36 144.411 75.9989   1
  -1   5 -36 208.672 77.6938   3
  -1  -5 -37 290.316 92.8381   4
  -1   5 -37 330.724 90.5639   3
  -1  -5 -37 146.353 92.5093   3
  -1   5 -37 393.158 95.9624   4
   1   5  37 269.775 106.485   2
   1  -5  37 321.614 100.310   1
   1   5  38 3.51750 81.1295   2
  -1   5 -38 15.5533 63.8771   4
  -1  -5 -38-169.971 96.9904   4
  -1  -5 -38-9.68008 82.1708   3
   1  -5  38-10.4361 72.3414   1
  -1   5 -39 855.721 130.228   4
  -1   5 -39 631.900 110.813   3
  -1  -5 -39 850.073 142.253   3
  -1  -5 -39 877.677 132.703   4
   1   5  39 842.268 148.964   2
   1  -5  39 721.766 128.571   1
  -1  -5 -40 174.805 78.1315   4
  -1   5 -40 79.1921 70.0129   4
  -1  -5 -40 232.572 102.918   3
   1   5  40 300.388 110.233   2
   1  -5  40 121.112 79.1784   1
  -1   5 -40 106.036 66.7516   3
  -1   5 -41-57.4560 69.0855   3
  -1   5 -41-27.2058 65.5451   4
  -1  -5 -41 247.066 107.240   3
   1  -5  41-98.9747 92.1833   1
   1   5  41 172.667 106.533   2
  -1  -5 -41-76.4152 85.7455   4
  -1   5 -42 32.5405 61.6173   3
   1   5  42 230.487 110.925   2
  -1  -5 -42 33.9057 79.2103   4
  -1   5 -42 198.749 84.7102   4
   1  -5  42 94.4789 85.2919   1
  -1  -5 -42 62.9051 81.9886   3
  -1   5 -43 190.743 82.2017   4
   1   5  43 184.117 96.4365   2
  -1   5 -43 53.9464 62.1289   3
   1  -5  43 97.0962 91.3527   1
  -1  -5 -43 57.8242 76.2735   4
  -1  -5 -43 59.0573 80.6640   3
   1   5  44 48.0491 98.1628   2
  -1  -5 -44 18.4617 85.9613   4
  -1   5 -44 94.2609 84.6051   4
   1  -5  44 22.1044 80.6317   1
  -1  -5 -44-49.2664 81.8824   3
  -1   5 -44 194.277 83.0385   3
  -1  -5 -45 41.0857 82.3584   4
  -1   5 -45-57.3970 64.7535   4
  -1  -5 -45 14.7658 78.3811   3
   1   5  45-72.5027 94.2333   2
   1  -5  45 198.225 115.142   1
  -1   5 -45 25.4710 63.8379   3
   1   5  46 184.677 110.145   2
  -1  -5 -46 194.275 100.995   4
   1  -5  46-61.4542 83.1169   1
  -1   5 -46 105.071 74.8630   4
  -1  -5 -46 44.5723 81.4625   3
  -1   5 -46-3.87162 66.8561   3
  -1  -5 -47 108.305 88.1466   4
  -1  -5 -47 54.1164 80.3755   3
  -1   5 -47 56.7920 76.7044   4
   1  -5  47 160.337 100.078   1
   1   5  47-164.159 99.9334   2
  -1   5 -47-55.7702 67.4001   3
  -1   5 -48 32.5530 72.2455   4
   1  -5  48 32.3949 93.5976   1
   1   5  48 17.4463 95.1449   2
  -1  -5 -48 95.9180 94.4755   4
  -1  -5 -48 0.11638 85.9807   3
  -1  -5 -49 45.8031 82.5169   4
  -1  -5 -49-2.00846 84.9017   3
  -1   5 -49-24.2181 75.6644   4
  -1  -5 -50 171.507 97.3355   4
  -1   5 -50 27.3867 75.9064   4
  -1  -5 -50 102.205 81.2760   3
  -1  -5 -51-19.6623 79.6490   4
   1   6 -46 178.971 87.5011   3
  -1   6  45 138.776 106.252   2
   1   6 -45 71.0982 75.9392   3
   1  -6 -45 281.157 125.770   3
  -1  -6  44 39.7384 85.6603   1
   1  -6 -44 37.8186 96.9618   3
  -1   6  44 57.8622 98.9942   2
   1   6 -44-3.73655 75.7558   3
   1  -6 -43-0.53562 91.3903   3
  -1  -6  43 88.4510 86.1846   1
  -1   6  43 64.1151 92.1090   2
   1   6 -43 56.6043 75.2116   3
   1  -6 -42 209.208 106.372   3
  -1  -6  42 62.3561 88.3400   1
  -1   6  42 203.389 107.991   2
   1   6 -42-34.8853 79.4594   3
   1  -6 -41-110.983 105.346   3
  -1   6  41 21.1805 83.8099   2
   1   6 -41-123.445 83.5213   3
   1  -6 -40 217.183 106.375   3
  -1   6  40 201.462 101.038   2
   1   6 -40 85.4706 74.5022   3
  -1  -6  40 275.939 99.2469   4
   1  -6 -40 179.293 82.8770   4
  -1  -6  40 281.826 98.6852   1
   1  -6 -39 40.6907 66.8446   4
  -1  -6  39 105.487 88.4817   1
   1  -6 -39 93.2450 99.5948   3
  -1   6  39 108.513 88.0496   2
   1   6 -39-2.72388 67.4681   3
  -1  -6  39 19.0882 78.7964   4
  -1  -6  38 144.789 89.3693   1
   1  -6 -38 30.6907 76.9605   4
  -1  -6  38 6.05873 72.8786   4
   1  -6 -38-106.508 89.5248   3
  -1   6  38 111.213 88.0997   2
   1   6 -38-31.9847 68.1588   3
  -1  -6  37 178.931 89.0620   1
   1  -6 -37-26.2536 72.0914   4
   1  -6 -37-22.7809 86.5831   3
  -1  -6  37 253.260 104.976   4
  -1   6  37 39.2891 69.8580   2
   1   6 -37-26.0509 64.4486   3
  -1  -6  36 3.92731 73.7524   1
  -1  -6  36 44.9531 79.2963   4
   1  -6 -36 156.829 102.169   3
   1  -6 -36 62.9199 68.2723   4
  -1   6  36 45.0917 69.2558   2
   1   6 -36-55.0926 69.0023   3
  -1  -6  35 1215.36 157.107   1
   1   6 -35 1168.98 147.474   3
  -1   6  35 1138.18 152.611   2
   1  -6 -35 1017.97 166.804   3
  -1  -6  35 912.910 146.505   4
   1  -6 -35 972.121 129.813   4
  -1  -6  34 747.414 125.353   1
   1  -6 -34 861.236 156.599   3
   1   6 -34 831.850 128.537   3
   1  -6 -34 713.656 112.009   4
  -1  -6  34 848.085 134.249   4
  -1   6  34 836.410 139.410   2
  -1  -6  33 454.529 108.487   1
  -1  -6  33 567.552 120.264   4
   1  -6 -33 443.020 90.2741   4
   1   6 -33 412.513 91.7555   3
   1  -6 -33 393.119 116.297   3
  -1   6  33 468.609 114.194   2
   1  -6 -32 188.516 78.3413   4
  -1  -6  32 240.066 95.4602   1
  -1   6  32 288.312 94.7274   2
   1   6 -32 225.092 82.6300   3
  -1  -6  32 126.407 75.3440   4
   1  -6 -32 166.751 108.060   3
  -1  -6  31 1247.22 147.935   1
   1   6 -31 1060.46 135.502   3
   1  -6 -31 1184.26 170.680   3
  -1   6  31 1233.93 152.779   2
   1  -6 -31 1200.26 132.261   4
  -1  -6  31 1044.06 145.146   4
  -1  -6  30 864.174 129.240   1
  -1  -6  30 955.884 142.635   4
  -1   6  30 854.092 126.207   2
   1  -6 -30 878.066 152.780   3
   1   6 -30 844.276 126.697   3
   1  -6 -30 755.834 109.401   4
  -1  -6  29 1258.10 160.385   4
  -1   6  29 1217.38 149.321   2
   1  -6 -29 883.087 142.192   3
  -1  -6  29 1008.95 132.176   1
   1   6 -29 1098.85 134.076   3
   1  -6 -29 952.495 119.291   4
  -1  -6  28 738.133 119.612   1
  -1   6  28 649.971 114.425   2
  -1  -6  28 875.437 135.668   4
   1  -6 -28 854.130 143.168   3
   1   6 -28 625.651 104.948   3
   1  -6 -28 757.374 106.613   4
  -1  -6  27 264.014 89.7883   4
  -1   6  27-64.0784 66.3313   2
   1  -6 -27 194.169 75.6413   4
  -1  -6  27 71.5425 64.6418   1
   1  -6 -27 69.0165 77.3568   3
   1   6 -27 22.6561 58.0947   3
  -1  -6  26 285.255 94.2997   4
   1  -6 -26 176.684 66.0707   4
   1  -6 -26 200.544 90.7354   3
  -1  -6  26 210.291 67.7308   1
  -1   6  26 192.045 71.2185   2
   1   6 -26 392.855 87.4335   3
  -1  -6  25 96.0633 72.8951   1
  -1  -6  25 114.188 77.8923   4
   1  -6 -25 15.0152 51.3614   4
  -1   6  25 133.853 73.6848   2
   1   6 -25 143.242 70.1708   3
  -1  -6  24 39.4043 54.2486   1
  -1   6  24 65.8583 60.9480   3
   1  -6 -24 57.2006 62.4484   4
  -1  -6  24 83.0437 70.1737   4
  -1   6  24 26.8015 52.2853   2
   1   6 -24 190.445 67.7051   3
  -1  -6  23 395.867 92.2775   1
  -1   6  23 210.590 72.0327   3
   1  -6 -23 229.002 72.4751   4
  -1   6  23 242.057 76.1806   2
  -1  -6  23 327.965 93.1462   4
   1   6 -23 138.794 66.0685   3
  -1  -6  22-42.5588 52.3872   1
   1  -6 -22 98.4129 57.5695   4
  -1   6  22 7.30821 55.2968   2
  -1  -6  22 70.7316 63.3707   4
   1   6 -22-9.37376 53.1351   3
  -1   6  22 106.534 71.3895   3
  -1   6  21 301.419 88.4141   3
  -1  -6  21 302.688 81.0939   1
  -1  -6  21 121.650 66.9110   4
   1  -6 -21 245.370 69.3858   4
  -1   6  21 251.175 67.9753   2
   1   6 -21 200.979 70.7963   3
  -1   6  20 270.161 81.3260   3
  -1  -6  20 114.953 61.9926   1
  -1  -6  20 253.281 81.8667   4
   1  -6 -20 200.870 65.8931   4
  -1   6  20 98.5275 53.9163   2
   1   6 -20 144.637 70.4906   3
  -1   6  19 183.417 64.4098   3
  -1  -6  19 267.394 76.3807   1
   1  -6 -19 239.504 67.3580   4
  -1   6  19 101.951 55.9271   2
  -1  -6  19 111.078 61.3572   4
   1   6 -19 181.501 72.3766   3
  -1  -6  18 376.024 77.5913   1
  -1   6  18 382.103 75.9372   2
  -1   6  18 582.719 103.968   3
  -1  -6  18 498.441 96.3839   4
   1  -6 -18 595.661 91.4768   4
   1   6 -18 308.048 79.9464   3
  -1  -6  17 3.90699 49.7924   1
   1  -6 -17 51.9109 52.0161   4
  -1   6  17 89.8474 61.1724   3
  -1  -6  17 121.073 71.0836   4
  -1   6  17 70.4008 55.7814   2
   1   6 -17 32.1414 52.2517   3
  -1   6  16 124.023 59.6745   3
   1  -6 -16 232.420 70.0735   4
  -1   6  16 309.617 74.8643   2
  -1  -6  16 141.327 66.3646   4
  -1  -6  16 159.618 60.6751   1
   1   6 -16 162.056 66.1726   3
  -1   6  15 37.8136 59.3427   3
  -1  -6  15-5.46221 53.8326   4
   1  -6 -15 62.5099 56.0895   4
  -1   6  15 22.0582 41.9455   2
   1   6 -15 181.968 68.6894   3
  -1  -6  15 9.55128 45.7299   1
  -1   6  14 397.971 88.2765   3
  -1  -6  14 265.695 76.9141   4
   1  -6 -14 264.064 70.0012   4
  -1  -6  14 193.694 61.6270   1
  -1   6  14 163.911 47.9267   2
   1   6 -14 311.223 78.7355   3
   1   6 -13 770.345 101.704   3
   1  -6 -13 781.774 98.3459   4
  -1  -6  13 898.583 118.035   4
  -1   6  13 846.592 113.542   3
  -1   6  13 830.690 91.5797   2
  -1  -6  13 661.590 90.1591   1
  -1  -6  12 102.216 69.6027   4
  -1  -6  12 76.4092 44.6872   1
  -1   6  12 44.7735 56.0295   3
  -1   6  12 83.1351 42.4430   2
   1  -6 -12 25.2623 48.8914   4
   1   6 -12 71.3335 54.3925   3
   1  -6 -11-38.5637 56.9288   4
  -1   6  11-15.3863 48.5637   3
  -1  -6  11-28.7192 56.2929   4
  -1  -6  11 62.2043 45.0041   1
   1   6 -11 87.4995 57.9840   3
  -1   6  11-13.7142 36.3343   2
  -1   6  10 113.867 61.8997   3
   1  -6 -10 70.2856 52.2337   4
   1   6 -10 106.511 37.7438   2
  -1  -6  10 76.9926 39.8449   1
  -1  -6  10 125.436 61.7036   4
  -1   6  10 106.503 46.8609   2
   1   6 -10 34.6671 48.0555   3
  -1   6   9-54.9997 47.9388   3
   1   6  -9 78.1947 66.2621   3
  -1  -6   9-10.3051 41.2150   1
  -1  -6   9-27.4009 53.6824   4
   1   6  -9-4.84408 32.7829   2
   1  -6  -9 62.5334 56.1084   4
  -1   6   9-11.3226 42.1437   2
  -1  -6   8 226.814 56.3257   1
   1  -6  -8 190.551 67.2565   4
   1   6  -8 227.168 46.0556   2
  -1  -6   8 162.616 61.7426   4
  -1   6   8 187.571 67.1607   3
  -1   6   8 131.817 44.9502   2
   1   6  -8 261.015 74.7139   3
  -1   6   7 117.468 55.9838   3
   1  -6  -7 208.696 67.9283   4
  -1  -6   7 168.319 67.3530   4
   1   6  -7 142.266 65.5560   3
  -1  -6   7 88.1755 45.1055   1
   1   6  -7 68.0443 33.5440   2
  -1   6   7 139.668 47.5209   2
  -1   6   6-8.23606 45.8879   3
  -1  -6   6 75.4792 48.0928   1
  -1   6   6-23.3106 37.2777   2
   1  -6  -6 54.1645 53.7193   4
   1   6  -6 53.4485 36.3529   2
   1   6  -6 46.0583 54.5312   3
  -1  -6   6-17.4722 55.4733   4
  -1   6   5 192.256 67.7042   3
  -1  -6   5 215.178 68.9894   4
   1   6  -5 248.610 48.6429   2
   1  -6  -5 238.541 70.1448   4
  -1  -6   5 195.125 51.5998   1
  -1   6   5 216.894 51.1377   2
   1   6  -5 207.256 66.7985   3
  -1   6   4 49.3551 54.0989   3
   1  -6  -4-50.2231 54.8875   4
  -1  -6   4 20.5077 35.3355   1
   1   6  -4 9.38171 34.7604   2
   1   6  -4 46.8514 49.0487   3
  -1   6   4 50.3477 38.7933   2
  -1  -6   4 75.3578 59.4309   4
  -1   6   3 120.718 50.4440   3
  -1  -6   3 152.043 62.6177   4
   1   6  -3 85.0757 58.8228   3
  -1  -6   3 96.6635 45.0135   1
   1  -6  -3 101.373 60.0894   4
  -1   6   3 66.5395 33.5361   2
   1   6  -3 120.632 45.2660   2
   1   6  -2 194.320 63.5494   3
   1  -6  -2 205.554 36.6616   1
   1  -6  -2 209.836 65.5455   4
   1   6  -2 291.756 56.4589   2
  -1   6   2 221.647 44.9005   2
  -1   6   2 170.834 63.1593   3
  -1  -6   2 165.573 49.2352   1
  -1  -6   2 224.010 69.2022   4
  -1   6   1 11.8585 53.4201   3
   1  -6  -1 17.2290 28.2471   1
   1   6  -1 54.4789 44.4489   2
   1   6  -1 52.4501 56.6529   3
  -1  -6   1 108.114 62.1568   4
  -1  -6   1 9.35685 35.2156   1
   1  -6  -1-28.5372 50.6277   4
  -1   6   1 33.1294 28.4699   2
   1   6   0 498.116 67.9731   2
  -1  -6   0 460.576 82.4961   4
  -1   6   0 489.588 55.2909   2
   1  -6   0 498.687 54.3361   1
  -1  -6   0 586.046 67.4686   1
   1  -6   0 446.262 84.0669   4
   1   6   0 567.075 86.2693   3
  -1   6   0 507.683 91.8811   3
   1  -6   1 66.7802 34.9227   1
   1   6   1 150.955 65.7671   3
  -1  -6  -1 32.4909 52.2431   4
   1  -6   1 71.1837 60.5302   4
  -1  -6  -1 105.400 43.0856   1
  -1   6  -1 43.2642 27.7574   2
   1   6   1 81.6664 45.9619   2
  -1   6  -1 193.553 73.4119   3
  -1  -6  -2 1212.10 126.475   4
   1   6   2 1183.82 98.7386   2
   1  -6   2 1043.71 76.4094   1
  -1   6  -2 941.573 65.9352   2
  -1   6  -2 1062.57 114.436   3
  -1  -6  -2 1136.59 86.2809   1
   1   6   2 1106.53 116.549   3
   1  -6   2 1028.82 115.009   4
   1   6   3 76.0814 52.7132   3
  -1   6  -3 7.56538 45.9889   3
   1   6   3 94.3953 48.3987   2
  -1  -6  -3 106.690 40.0149   1
  -1  -6  -3 144.084 70.9918   4
   1  -6   3 77.6066 60.1942   4
   1  -6   3 89.9953 35.4001   1
   1   6   4 139.871 57.9917   3
   1   6   4 40.3919 39.7768   2
  -1   6  -4 88.8662 60.8930   3
   1  -6   4 96.3863 55.3013   4
   1  -6   4 120.873 40.6539   1
  -1  -6  -4 171.062 62.7470   4
  -1  -6  -4 105.178 40.9340   1
  -1  -6  -5-1.50559 30.7875   1
   1   6   5 17.7716 50.9224   3
  -1   6  -5-26.5054 46.9512   3
  -1  -6  -5-1.34605 52.8877   4
   1  -6   5 93.7019 57.4067   4
   1   6   5 45.3197 41.4580   2
   1  -6   5 51.5281 36.5190   1
   1   6   6 108.967 49.1072   2
  -1  -6  -6 27.4487 29.8200   1
   1   6   6 76.2329 54.2609   3
  -1   6  -6 108.428 61.3312   3
   1  -6   6 29.1148 56.5086   4
  -1  -6  -6 35.9460 49.4953   4
   1  -6   6 21.6407 34.9807   1
   1   6   7-8.41108 45.1898   3
  -1  -6  -7 155.272 59.1955   4
   1  -6   7 114.663 62.0690   4
  -1   6  -7 65.8937 49.5410   3
  -1  -6  -7 117.626 39.7668   1
   1  -6   7 41.2499 38.4095   1
   1   6   7 2.12460 54.0603   2
   1   6   8 102.183 56.4961   3
  -1  -6  -8 74.3600 54.8107   4
  -1  -6  -8 120.049 37.0743   1
   1   6   8 137.792 57.9848   2
   1  -6   8 156.881 68.6053   4
   1  -6   8 113.769 46.1679   1
  -1   6  -8 77.3977 55.2577   3
   1   6   9 97.6069 56.5266   3
   1   6   9 17.8133 49.1438   2
  -1  -6  -9 57.3314 57.4757   4
   1  -6   9-37.8796 53.8125   4
   1  -6   9-35.6140 40.1786   1
  -1   6  -9-2.31052 50.9749   3
   1   6  10 719.817 96.1821   3
   1  -6  10 555.952 77.0920   1
  -1  -6 -10 736.797 102.985   4
   1   6  10 583.024 81.9011   2
  -1   6 -10 692.581 99.5903   3
   1  -6  10 595.836 100.757   4
   1  -6  11 119.383 71.8662   4
   1   6  11 127.774 61.5011   2
   1  -6  11 66.3773 47.3024   1
  -1  -6 -11 72.1212 59.6408   4
   1   6  11 113.119 52.0320   3
  -1   6 -11 174.438 64.3610   3
   1  -6  12 830.898 114.319   4
  -1  -6 -12 729.297 102.397   4
   1   6  12 712.465 94.5593   2
  -1   6 -12 753.021 105.236   3
   1   6  12 556.259 93.9808   3
   1  -6  12 663.211 86.3648   1
  -1  -6 -13 48.6961 59.6090   4
   1  -6  13 26.7495 55.7194   4
   1   6  13 55.8575 51.3146   3
   1   6  13 46.7435 50.8093   2
   1  -6  13 123.442 55.3208   1
  -1   6 -13 95.1465 60.0335   3
   1  -6  14 203.201 79.6281   4
   1   6  14 106.994 58.6808   2
   1   6  14 195.595 65.4791   3
   1  -6  14 156.085 59.4570   1
  -1  -6 -14 269.665 78.0292   4
  -1   6 -14 264.772 73.7955   3
   1  -6  15 30.8348 62.0063   4
   1   6  15 51.6988 59.6429   2
   1   6  15 46.4029 48.9124   3
  -1  -6 -15 243.771 74.6130   4
   1  -6  15 74.8355 55.7733   1
  -1   6 -15 62.5071 59.9462   3
   1   6  16 282.099 75.4439   3
  -1  -6 -16 336.207 85.1430   4
   1  -6  16 244.653 84.2799   4
   1   6  16 333.841 76.0682   2
   1  -6  16 432.471 81.9905   1
  -1   6 -16 418.663 91.6000   3
  -1  -6 -17 72.5046 62.9241   4
   1  -6  17 24.9210 61.4849   4
  -1   6 -17 148.406 72.1363   3
   1   6  17 89.5556 55.1738   3
   1  -6  17 110.163 54.8273   1
   1   6  17-41.7559 58.0234   2
   1   6  18 267.024 72.1292   3
  -1  -6 -18 275.214 72.4201   4
  -1   6 -18 339.303 87.5970   3
   1   6  18 363.026 88.1768   2
   1  -6  18 364.530 79.8282   1
   1   6  19 229.203 69.8450   3
   1   6  19 371.755 90.6788   2
  -1  -6 -19 208.295 65.8120   4
   1  -6  19 198.281 66.3233   1
  -1   6 -19 218.412 70.1413   4
  -1   6 -19 316.628 81.3674   3
   1   6  20 345.789 87.2288   3
   1   6  20 447.331 96.0805   2
  -1   6 -20 548.384 99.1141   4
  -1  -6 -20 389.631 83.3007   4
   1  -6  20 286.031 76.6330   1
  -1   6 -20 423.489 85.7625   3
   1   6  21 65.1263 59.1094   3
   1  -6  21 169.472 63.6138   1
  -1   6 -21 181.375 70.0276   4
  -1   6 -21 180.317 72.6792   3
  -1  -6 -21 253.678 83.5129   4
   1   6  21 225.958 83.0490   2
  -1  -6 -22 151.439 66.3354   4
  -1   6 -22 95.4484 62.0589   3
   1   6  22 199.593 79.5037   2
   1   6  22 91.2582 59.4879   3
   1  -6  22 214.852 71.8998   1
  -1   6 -22 111.134 64.3526   4
   1   6  23 251.896 75.1764   3
   1  -6  23 294.505 78.7780   1
  -1  -6 -23 239.335 74.0288   4
  -1   6 -23 235.273 74.0952   4
   1   6  23 243.146 86.9458   2
  -1   6 -23 233.549 73.5236   3
  -1  -6 -24 90.0988 64.7232   4
  -1   6 -24 30.3246 56.5085   4
   1   6  24 65.2817 63.2110   3
   1   6  24 33.4975 73.1198   2
   1  -6  24 4.09416 54.9118   1
  -1   6 -24-62.7357 56.3286   3
  -1  -6 -25-38.7090 59.7475   4
  -1   6 -25 81.5463 60.7180   4
   1   6  25-4.43135 63.2299   2
   1   6  25 58.9466 63.1380   3
   1  -6  25-136.410 72.8917   1
  -1   6 -25-12.5724 55.6898   3
  -1   6 -26 0.93182 60.2031   4
  -1   6 -26-7.14030 55.2760   3
   1   6  26-17.2857 60.3423   3
   1  -6  26 1.58172 60.3921   1
  -1  -6 -26 50.4647 62.2598   4
   1   6  26-99.0500 81.3499   2
   1   6  27-9.30207 57.6441   3
  -1  -6 -27 107.652 73.2246   4
   1  -6  27 218.669 79.9782   1
  -1   6 -27 146.839 74.7296   4
   1   6  27 198.198 92.5073   2
  -1   6 -27 254.341 81.0319   3
   1   6  28-43.5440 63.4188   3
  -1  -6 -28 77.2856 72.0178   4
   1   6  28 189.524 81.5665   2
  -1   6 -28 49.6705 56.5011   4
   1  -6  28 80.9985 64.3273   1
  -1   6 -28 222.828 83.6167   3
  -1  -6 -29 459.115 94.8256   4
  -1   6 -29 621.122 106.094   3
  -1   6 -29 388.561 89.6905   4
   1   6  29 406.934 106.590   2
   1  -6  29 565.517 105.904   1
  -1  -6 -30 408.950 99.7686   4
   1  -6  30 295.477 89.7748   1
  -1   6 -30 407.935 99.4863   4
  -1  -6 -30 481.797 120.474   3
   1   6  30 494.035 115.952   2
  -1   6 -30 421.439 101.330   3
  -1  -6 -31 196.495 81.3749   4
  -1   6 -31 16.4939 59.5622   4
   1  -6  31 104.163 77.0897   1
  -1  -6 -31-15.7189 74.5761   3
   1   6  31 2.34374 72.2717   2
  -1   6 -31 9.98711 63.3343   3
  -1  -6 -32 331.945 96.0334   3
   1  -6  32 329.101 92.1368   1
  -1  -6 -32 261.430 86.4868   4
  -1   6 -32 489.629 104.648   4
   1   6  32 364.921 107.297   2
  -1   6 -32 331.458 90.9734   3
  -1  -6 -33 37.4424 69.8940   4
   1   6  33-77.3824 83.4400   2
  -1  -6 -33 26.4356 78.3713   3
  -1   6 -33 101.946 69.9457   4
   1  -6  33 40.0741 73.8723   1
  -1   6 -33 11.3018 59.4720   3
  -1   6 -34 262.565 87.7545   4
  -1  -6 -34 332.712 104.014   3
  -1  -6 -34 302.320 90.6479   4
   1   6  34 352.547 112.184   2
   1  -6  34 327.562 93.4239   1
  -1   6 -34 402.206 97.0593   3
  -1   6 -35 80.6509 71.4801   4
  -1  -6 -35 157.547 87.4110   4
  -1  -6 -35 287.100 106.200   3
   1   6  35 77.4406 80.9796   2
   1  -6  35 261.666 98.8592   1
  -1   6 -35 327.390 93.9957   3
  -1   6 -36-75.8382 80.2526   4
  -1  -6 -36-36.9087 75.2183   4
  -1  -6 -36 30.5400 79.0308   3
   1   6  36 24.4150 84.2036   2
   1  -6  36 43.9234 72.1435   1
  -1   6 -36 116.970 79.9896   3
  -1   6 -37 628.787 119.120   4
  -1   6 -37 572.767 112.326   3
  -1  -6 -37 484.532 124.277   3
   1  -6  37 538.914 118.425   1
  -1  -6 -37 460.603 111.609   4
   1   6  37 503.184 134.099   2
  -1  -6 -38 73.2982 83.5656   3
  -1   6 -38 218.111 90.6422   4
  -1  -6 -38 77.6314 80.9584   4
   1   6  38 283.504 103.181   2
   1  -6  38 166.121 100.463   1
  -1   6 -38 228.778 87.4517   3
  -1   6 -39 251.098 86.5490   4
  -1   6 -39 250.286 94.1664   3
   1  -6  39 60.5769 82.6364   1
  -1  -6 -39 314.450 103.028   4
  -1  -6 -39 194.448 98.7541   3
   1   6  39 259.296 110.693   2
  -1  -6 -40 186.114 100.190   3
  -1  -6 -40 39.3162 76.0748   4
  -1   6 -40 57.5336 70.4849   4
   1   6  40 231.110 118.460   2
   1  -6  40 44.7320 85.1793   1
  -1   6 -40 141.676 84.0069   3
   1  -6  41 332.720 114.507   1
   1   6  41 215.377 108.172   2
  -1  -6 -41 322.178 120.811   3
  -1  -6 -41 470.823 123.409   4
  -1   6 -41 71.7503 77.9540   4
  -1   6 -41 253.229 93.8223   3
  -1   6 -42-9.42371 68.9533   4
  -1  -6 -42 162.743 110.422   3
  -1  -6 -42-91.2537 95.8456   4
   1  -6  42 39.9073 86.9460   1
   1   6  42 150.395 99.1636   2
  -1   6 -42 21.1277 65.8493   3
   1   6  43-92.8028 110.053   2
  -1  -6 -43 85.8544 96.4034   3
  -1   6 -43 8.96506 72.2068   4
  -1  -6 -43-2.05503 77.6037   4
  -1   6 -43-17.1941 66.5394   3
   1  -6  43 71.6914 94.5967   1
   1  -6  44-167.321 107.502   1
  -1  -6 -44-42.7694 83.2637   4
  -1   6 -44 56.8608 79.4012   4
   1   6  44 69.8320 96.3753   2
  -1   6 -44 9.24766 68.5937   3
  -1  -6 -45 107.061 89.7045   4
  -1   6 -45-38.2120 72.4856   4
  -1  -6 -45 99.7663 103.879   3
  -1   6 -45-111.148 86.0264   3
  -1  -6 -46 140.502 100.026   4
  -1   6 -46 30.2016 72.3567   4
  -1  -6 -46 106.147 100.123   3
  -1  -6 -47 254.845 107.820   4
  -1  -6 -47 220.723 110.476   3
  -1  -6 -48 104.395 102.840   3
  -1  -7  43 37.5886 90.4580   4
  -1  -7  42 11.5100 92.8589   4
  -1  -7  41-7.41898 88.6691   4
  -1   7  41-171.212 107.759   2
   1  -7 -40 13.2698 97.0825   3
  -1  -7  40-59.4666 89.0081   4
  -1  -7  40 62.9420 87.4722   1
  -1   7  40-165.926 111.966   2
   1   7 -40-66.3251 77.4092   3
  -1  -7  39-59.5612 95.6164   4
   1  -7 -39 23.3897 93.0391   3
  -1  -7  39-16.3556 84.4539   1
  -1   7  39 73.2131 97.6329   2
   1   7 -39-80.4392 82.0775   3
   1  -7 -38 131.411 87.3483   4
   1   7 -38 27.6673 76.5238   3
   1  -7 -38-101.888 99.4959   3
  -1  -7  38-1.79275 81.8267   4
  -1   7  38-4.57164 82.1010   2
  -1  -7  38-48.5448 90.3884   1
   1  -7 -37 18.6826 70.0939   4
  -1   7  37 135.724 97.0013   2
   1  -7 -37 159.185 109.490   3
  -1  -7  37-61.1094 88.4732   4
   1   7 -37 26.3770 72.0743   3
  -1  -7  37-120.045 80.2654   1
  -1  -7  36 104.311 84.6716   4
   1  -7 -36 132.139 81.1615   4
   1  -7 -36-14.1333 93.6763   3
  -1   7  36-83.6031 90.9068   2
   1   7 -36 65.3080 71.3568   3
  -1  -7  36 120.685 88.7229   1
  -1  -7  35 470.595 119.138   1
  -1   7  35 334.587 101.524   2
   1  -7 -35 465.431 110.086   4
   1  -7 -35 344.366 125.699   3
  -1  -7  35 273.493 101.498   4
   1   7 -35 329.634 102.795   3
   1  -7 -34-44.9113 77.4393   4
  -1  -7  34 187.498 98.1773   4
  -1  -7  34 49.7344 80.3277   1
  -1   7  34 257.950 92.5898   2
   1   7 -34 123.132 72.6169   3
   1  -7 -34 63.5955 92.5578   3
  -1  -7  33 179.381 95.0554   4
  -1  -7  33 105.634 72.7793   1
   1  -7 -33 231.537 90.4256   4
   1  -7 -33 30.1306 86.4296   3
  -1   7  33-11.0026 74.2984   2
   1   7 -33-136.849 78.9234   3
  -1  -7  32 73.6600 82.9831   1
  -1  -7  32-34.4558 76.9715   4
   1  -7 -32 128.418 79.9207   4
   1   7 -32 14.7059 66.3812   3
   1  -7 -32 76.7455 84.5629   3
  -1   7  32 29.9879 82.5520   2
   1  -7 -31 157.604 97.6949   3
  -1  -7  31 259.627 97.3154   1
  -1  -7  31 185.183 91.8713   4
  -1   7  31 81.2108 76.0146   2
   1  -7 -31 267.169 86.0288   4
   1   7 -31 449.934 105.463   3
  -1  -7  30 11.6653 71.5128   1
  -1  -7  30-77.7733 82.1471   4
   1  -7 -30 79.0760 68.0054   4
   1  -7 -30 191.942 109.109   3
  -1   7  30 104.916 77.6256   2
   1   7 -30-126.494 80.5450   3
  -1  -7  29 453.897 104.280   1
   1  -7 -29 597.348 141.813   3
  -1  -7  29 310.067 91.8063   4
   1  -7 -29 331.630 91.6820   4
  -1   7  29 426.814 99.3555   2
   1   7 -29 435.907 108.700   3
  -1   7  28 1058.12 138.170   2
   1  -7 -28 1166.46 142.180   4
  -1  -7  28 1011.48 140.513   1
  -1  -7  28 967.851 146.652   4
   1   7 -28 1028.95 144.879   3
   1  -7 -28 1183.71 174.020   3
  -1  -7  27 101.222 69.1418   1
  -1  -7  27 179.370 90.5664   4
   1  -7 -27 174.872 75.3453   4
   1   7 -27 350.266 96.9191   3
   1  -7 -27 286.134 124.742   3
  -1   7  27 112.023 75.4221   2
  -1  -7  26 438.967 100.923   1
   1  -7 -26 501.461 98.7439   4
  -1   7  26 375.054 92.7233   2
   1   7 -26 363.708 93.3970   3
  -1  -7  26 449.818 107.204   4
  -1   7  25-37.2661 75.7734   3
   1  -7 -25-93.4918 77.0074   4
  -1   7  25 153.617 83.0983   2
  -1  -7  25-16.7875 59.6027   1
  -1  -7  25 27.2138 67.9017   4
   1   7 -25 42.4809 71.3278   3
  -1   7  24 504.851 111.261   3
  -1  -7  24 137.942 86.7175   4
   1  -7 -24 334.552 85.4620   4
  -1  -7  24 304.758 89.1362   1
   1   7 -24 415.249 109.119   3
  -1   7  24 306.531 81.7004   2
  -1  -7  23 854.029 133.822   4
   1  -7 -23 801.170 111.765   4
   1   7 -23 828.832 125.001   3
  -1  -7  23 703.333 114.441   1
  -1   7  23 560.328 97.2782   2
  -1   7  23 677.266 119.786   3
  -1   7  22 248.019 91.0962   3
  -1  -7  22 32.0188 63.6053   1
  -1  -7  22 220.343 95.9900   4
   1  -7 -22 52.3805 55.2687   4
  -1   7  22 10.7132 61.2935   2
   1   7 -22 48.7064 64.4904   3
  -1   7  21 63.2451 66.2263   3
  -1  -7  21 82.4605 59.8686   1
   1  -7 -21 1.20484 62.6389   4
  -1  -7  21 109.414 76.5458   4
  -1   7  21-1.71823 56.5691   2
   1   7 -21 55.9472 61.0251   3
  -1  -7  20 60.9432 55.8415   1
  -1   7  20 21.7264 66.8208   3
  -1  -7  20 26.7798 60.3704   4
   1  -7 -20 69.5405 57.7038   4
  -1   7  20-19.6245 52.1543   2
   1   7 -20-5.88203 65.1651   3
   1  -7 -19 60.0795 62.7344   4
  -1   7  19-55.2253 64.4174   3
  -1  -7  19 148.310 76.0007   4
  -1  -7  19 2.95344 54.5096   1
   1   7 -19 23.4966 56.5820   3
  -1   7  19-88.6175 59.4552   2
  -1   7  18 33.3490 63.2623   3
  -1   7  18-16.5655 49.7801   2
  -1  -7  18 76.9527 76.7372   4
   1   7 -18 115.292 71.3259   3
   1  -7 -18-25.0501 59.7216   4
  -1  -7  18 115.692 57.0231   1
  -1   7  17-7.50208 58.0791   3
   1  -7 -17-1.88141 57.4501   4
  -1  -7  17 56.1379 62.4002   4
   1   7 -17-20.5078 58.6114   3
  -1   7  17 34.3649 54.4524   2
  -1  -7  17 18.1531 53.2439   1
  -1   7  16 5.23267 58.1814   3
  -1  -7  16 41.1334 61.1511   4
   1  -7 -16 65.9766 63.4451   4
  -1  -7  16-91.9544 68.6478   1
  -1   7  16 83.0108 55.9085   2
   1   7 -16 54.6016 61.7311   3
  -1   7  15 22.7612 61.9282   3
   1  -7 -15 7.93112 55.6830   4
  -1  -7  15-33.9229 62.9403   4
  -1  -7  15 45.9893 55.0115   1
  -1   7  15 49.6177 49.6369   2
   1   7 -15 18.3421 56.9271   3
  -1   7  14 0.89403 60.2206   3
  -1   7  14-53.3199 55.1628   2
   1  -7 -14 110.400 68.6715   4
  -1  -7  14 16.8806 65.6201   4
  -1  -7  14-7.33785 51.6879   1
   1   7 -14 31.1756 62.7925   3
  -1  -7  13 167.624 62.6981   1
  -1  -7  13 74.0393 68.1763   4
  -1   7  13 180.527 75.2136   3
   1  -7 -13-8.87277 61.3599   4
  -1   7  13 151.591 44.2737   2
   1   7 -13 248.218 82.1566   3
  -1   7  12 79.4106 49.6550   2
  -1   7  12-0.15805 63.6710   3
  -1  -7  12 129.796 74.3188   4
  -1  -7  12 89.5962 55.6700   1
   1   7 -12 24.8395 55.5613   3
   1  -7 -12 238.489 76.1180   4
  -1   7  11 261.366 78.2409   3
  -1  -7  11 160.886 62.5907   4
   1  -7 -11 427.947 91.2209   4
  -1  -7  11 263.800 71.8757   1
  -1   7  11 318.386 67.5934   2
   1   7 -11 361.814 87.0016   3
  -1   7  10-13.6328 58.8097   3
  -1  -7  10 163.096 71.7703   4
   1  -7 -10 66.9705 59.7547   4
  -1  -7  10 62.4195 48.5698   1
  -1   7  10 9.75217 42.3169   2
   1   7 -10 9.61626 55.6073   3
   1  -7  -9 170.238 81.3640   4
  -1   7   9 47.6160 58.9990   3
  -1  -7   9-14.7281 42.6834   1
  -1   7   9 33.6399 49.6444   2
  -1  -7   9 42.3260 62.6550   4
   1   7  -9 17.5380 64.9349   3
   1  -7  -8 1208.17 133.987   4
  -1  -7   8 1083.03 104.574   1
  -1   7   8 1041.67 99.0147   2
  -1  -7   8 1230.96 139.716   4
   1   7  -8 1268.96 138.096   3
  -1   7   8 952.163 120.377   3
  -1   7   7 127.581 66.9584   3
  -1  -7   7 123.009 48.2119   1
   1   7  -7 128.111 74.6361   3
   1  -7  -7 85.1619 65.6455   4
  -1  -7   7 196.581 83.4240   4
  -1   7   7 42.0070 41.8651   2
  -1   7   6-5.47233 54.7259   3
  -1  -7   6 147.799 75.7912   4
  -1  -7   6 3.79528 43.0057   1
   1  -7  -6 42.8457 68.5156   4
   1   7  -6 89.0459 69.2992   3
  -1   7   5 212.683 78.9325   3
  -1  -7   5 183.035 73.3809   4
  -1  -7   5 161.999 51.7439   1
   1  -7  -5 247.079 77.7791   4
   1   7  -5 145.799 64.9114   3
  -1  -7   4 95.7318 68.0726   4
  -1   7   4 35.1140 60.9918   3
   1  -7  -4 33.3892 56.2113   4
  -1  -7   4 79.9023 45.8949   1
   1   7  -4 50.2475 60.6438   3
  -1   7   3 53.4960 53.7543   3
   1  -7  -3 81.7342 62.5734   4
  -1  -7   3 6.09738 43.1014   1
  -1  -7   3 162.455 62.3496   4
   1   7  -2 140.954 68.0954   3
  -1   7   2 92.6530 67.0123   3
   1  -7  -2-48.8531 58.5513   4
  -1  -7   2-5.46666 42.4765   1
  -1  -7   2 101.059 63.3492   4
  -1   7   1 147.006 67.3843   3
   1   7  -1 23.8900 39.1243   2
   1   7  -1 153.317 65.7691   3
  -1  -7   1 89.0809 68.0063   4
  -1  -7   1 74.4160 39.5037   1
   1  -7  -1 215.833 80.6325   4
   1   7   0-11.4873 57.5012   3
  -1   7   0 76.3517 66.9462   3
  -1  -7   0-59.8226 60.6248   4
   1   7   0 74.6540 52.2085   2
   1  -7   0 11.5243 62.6799   4
   1   7   1 43.7991 63.0069   3
  -1   7  -1 110.383 64.7164   3
   1  -7   1 106.600 72.7350   4
   1   7   1-16.5447 41.3747   2
  -1  -7  -1 36.5249 56.3720   4
  -1   7  -2-26.7823 55.7015   3
   1  -7   2 110.891 75.0122   4
   1   7   2 86.7654 51.6988   2
   1   7   2-1.09422 54.3566   3
  -1  -7  -2 70.6045 57.5465   4
   1   7   3 97.3650 64.8423   3
  -1   7  -3 160.700 72.9911   3
   1  -7   3 67.4742 66.0842   4
  -1  -7  -3 142.040 75.0373   4
   1   7   3 167.968 53.3678   2
   1   7   4 96.4773 60.7107   3
   1  -7   4 177.614 77.9785   4
  -1  -7  -4 86.0952 67.0785   4
  -1   7  -4 70.0101 67.7720   3
   1   7   4 8.86360 42.7408   2
   1   7   5 182.159 75.4500   3
   1  -7   5-49.2760 68.3295   4
  -1  -7  -5 73.8835 66.7250   4
  -1   7  -5 43.0599 61.8892   3
   1   7   5 43.3032 44.9832   2
  -1   7  -6 81.6348 64.3359   3
   1   7   6 91.8005 61.5002   3
   1  -7   6 15.1770 41.8534   1
   1  -7   6 156.813 83.0615   4
   1   7   6 143.458 58.8575   2
  -1  -7  -6 218.375 82.4101   4
  -1   7  -7 145.390 73.2220   3
   1  -7   7 118.347 51.8220   1
   1   7   7 190.992 65.8038   2
   1   7   7 45.2703 58.9922   3
   1  -7   7 143.307 73.1961   4
  -1  -7  -7 143.055 77.6684   4
   1  -7   8 102.572 45.7203   1
   1   7   8 144.689 67.0387   3
  -1  -7  -8 95.2932 65.3017   4
   1  -7   8 96.4424 71.3861   4
   1   7   8-36.7626 53.4350   2
  -1   7  -8 126.712 71.2433   3
   1  -7   9 227.801 60.6201   1
   1  -7   9 421.031 99.6485   4
   1   7   9 449.992 94.5232   3
  -1  -7  -9 430.545 95.6412   4
  -1   7  -9 423.874 95.1011   3
   1   7   9 396.289 84.1667   2
   1  -7  10-26.1690 62.8875   4
   1   7  10 30.9318 57.3116   3
   1   7  10-22.9831 49.3304   2
  -1  -7 -10-18.2612 57.0435   4
   1  -7  10 85.0436 50.4830   1
  -1   7 -10-4.71529 61.5345   3
  -1  -7 -11-11.9070 57.0759   4
   1   7  11 21.1451 53.0862   3
   1  -7  11 133.760 78.1366   4
   1  -7  11 16.1149 42.6020   1
  -1   7 -11 0.62260 65.9813   3
   1   7  11 4.20738 56.4990   2
   1   7  12-3.87553 56.1212   3
   1   7  12-10.7417 56.1744   2
  -1  -7 -12 52.8989 64.0286   4
   1  -7  12 9.17336 62.4812   4
   1  -7  12-82.9474 55.5502   1
  -1   7 -12 13.6409 54.6828   3
  -1  -7 -13-30.0356 66.3659   4
   1  -7  13 42.9714 52.4232   1
   1  -7  13 34.1102 71.3556   4
   1   7  13 78.5727 63.5747   2
   1   7  13-116.528 69.0515   3
  -1   7 -13 38.9465 66.5915   3
   1   7  14 2.00222 54.9397   3
  -1  -7 -14-0.85781 61.7216   4
   1  -7  14-5.45659 47.8523   1
   1  -7  14 279.202 94.1062   4
   1   7  14 221.358 80.6795   2
  -1   7 -14 92.9782 73.6186   3
   1   7  15 102.140 69.1829   3
   1  -7  15-90.8431 75.3360   4
  -1  -7 -15 82.1267 64.2954   4
   1   7  15 5.63168 55.9677   2
   1  -7  15 19.1329 48.1948   1
  -1   7 -15 93.9193 71.9754   3
   1   7  16-9.46235 60.4727   3
  -1  -7 -16 52.4253 66.9066   4
   1  -7  16 7.31252 60.7602   4
   1   7  16 51.7433 64.6309   2
   1  -7  16 138.424 65.0886   1
  -1   7 -16-30.1507 59.8063   3
   1   7  17 58.0516 60.2574   3
   1   7  17 155.867 79.2208   2
  -1  -7 -17 12.0220 58.5774   4
   1  -7  17 53.8405 68.2321   4
  -1   7 -17 51.3856 66.4342   3
   1  -7  17 79.5526 60.0434   1
   1   7  18 134.478 73.5236   3
   1   7  18 156.592 82.1789   2
   1  -7  18 64.2964 72.1965   4
  -1   7 -18 9.82187 61.9169   3
  -1  -7 -18 160.899 67.8050   4
   1  -7  18 68.8850 60.6573   1
  -1  -7 -19 135.971 76.9248   4
   1   7  19 191.074 80.0233   2
   1   7  19 151.688 73.6877   3
   1  -7  19 200.375 89.5468   4
   1  -7  19 87.0760 55.5117   1
  -1   7 -19 97.6295 71.3061   3
   1   7  20 143.122 62.3001   3
  -1  -7 -20 23.4010 58.4324   4
   1  -7  20 183.366 80.4270   4
   1   7  20 241.525 86.3929   2
   1  -7  20-23.7216 56.9046   1
  -1   7 -20 112.020 73.4909   3
  -1   7 -21 158.123 76.5992   3
   1   7  21 69.5240 70.9949   3
  -1  -7 -21 38.3536 60.7200   4
   1   7  21-79.9271 76.3529   2
   1  -7  21-54.2745 76.2600   4
   1  -7  21 30.2741 57.4491   1
   1  -7  22 199.052 96.2960   4
   1   7  22 60.6908 65.4841   3
  -1  -7 -22 141.331 64.4054   4
   1  -7  22 98.1036 71.8594   1
   1   7  22 70.3374 72.4549   2
  -1   7 -22 52.2479 59.3116   3
   1  -7  23 536.070 124.841   4
   1   7  23 283.735 90.5088   3
  -1   7 -23 370.036 98.9446   3
   1   7  23 358.287 106.519   2
  -1  -7 -23 476.220 104.313   4
   1  -7  23 255.243 79.5851   1
  -1  -7 -24 664.450 110.472   4
   1  -7  24 934.456 125.632   1
   1  -7  24 979.546 155.689   4
   1   7  24 752.154 120.253   3
  -1   7 -24 966.030 132.473   3
   1   7  24 828.506 137.557   2
   1   7  25-4.79456 60.3032   3
  -1  -7 -25 14.1159 66.0287   4
  -1   7 -25 10.8376 67.4482   3
   1   7  25 149.256 89.6287   2
   1  -7  25 12.9162 73.7916   4
   1  -7  25 38.9426 70.4328   1
   1   7  26-46.1828 71.4479   3
   1  -7  26 21.0491 73.7192   1
   1   7  26-38.8492 70.3251   2
  -1  -7 -26 75.7344 68.1837   4
  -1   7 -26 77.3646 76.8142   3
   1   7  27 74.2853 79.2137   3
  -1  -7 -27 90.3493 69.1633   4
   1  -7  27-20.0294 76.5351   4
   1   7  27 57.2253 79.9867   2
   1  -7  27 190.740 88.9177   1
  -1   7 -27 92.7216 67.5916   3
   1   7  28-2.25414 65.8191   3
  -1   7 -28 116.349 76.5833   3
  -1  -7 -28 21.3450 70.5067   4
   1   7  28 9.34704 76.9530   2
   1  -7  28 57.2946 68.7501   1
  -1  -7 -29 416.785 101.404   4
   1   7  29 425.623 101.666   3
  -1   7 -29 373.982 97.4314   3
   1   7  29 321.751 107.971   2
   1  -7  29 305.895 92.7797   1
  -1  -7 -30 438.931 105.034   4
   1   7  30 405.462 121.535   2
   1  -7  30 545.887 112.731   1
  -1   7 -30 226.334 87.6375   3
  -1  -7 -31-45.7931 86.4039   3
  -1   7 -31 42.3995 68.3667   4
   1   7  31 24.1275 84.1864   2
  -1  -7 -31 125.492 86.7006   4
   1  -7  31 102.063 70.5691   1
  -1   7 -31 34.1715 63.4915   3
  -1  -7 -32 44.6465 80.3788   3
  -1  -7 -32-0.19366 68.6196   4
  -1   7 -32 22.7567 68.0340   4
   1   7  32 68.1577 79.9265   2
  -1   7 -32 3.27068 71.4516   3
   1  -7  32-46.5475 71.7165   1
   1  -7  33 139.578 89.9236   1
   1   7  33 34.8548 84.7940   2
  -1  -7 -33 153.710 97.7517   3
  -1  -7 -33 33.3775 70.4558   4
  -1   7 -33 146.447 80.4341   4
  -1   7 -33-12.3781 71.1579   3
  -1   7 -34 72.1506 71.2044   4
  -1  -7 -34 1.51187 91.0995   3
  -1  -7 -34 248.251 97.6883   4
   1   7  34 189.762 111.468   2
   1  -7  34 147.818 90.3316   1
  -1   7 -34 85.4194 74.9957   3
  -1  -7 -35 235.562 96.1083   4
   1   7  35 26.2013 94.0200   2
  -1   7 -35-85.5016 73.6199   4
  -1  -7 -35 173.188 106.005   3
   1  -7  35 21.8328 76.9014   1
  -1   7 -35-77.7883 73.0655   3
  -1  -7 -36 43.5961 72.6849   4
  -1   7 -36 95.8941 79.5911   3
   1   7  36 114.526 86.2524   2
  -1  -7 -36-108.136 105.918   3
  -1   7 -36-18.3958 69.3157   4
   1  -7  36 150.281 93.9643   1
  -1  -7 -37 115.542 85.8219   4
  -1  -7 -37-47.4663 92.3394   3
  -1   7 -37-135.805 88.5565   4
   1   7  37 99.7075 92.9578   2
  -1   7 -37 134.535 80.3128   3
   1  -7  37 22.8090 74.8524   1
  -1  -7 -38 166.848 95.0252   4
  -1   7 -38 57.8167 70.6873   4
   1   7  38 52.5938 92.1080   2
  -1   7 -38 138.590 93.2380   3
   1  -7  38 213.827 102.970   1
  -1  -7 -38 99.5931 100.082   3
  -1   7 -39 122.710 78.7430   3
  -1   7 -39 5.35564 73.3124   4
   1   7  39-63.5797 102.677   2
  -1  -7 -39-91.0019 85.9987   4
  -1  -7 -39-70.1415 93.1042   3
   1  -7  39 23.4800 83.2104   1
  -1  -7 -40-10.3226 80.9418   4
  -1   7 -40 247.918 99.9798   4
  -1  -7 -40 90.6951 103.815   3
  -1   7 -40 178.905 91.7646   3
   1   7  40 57.2579 93.8442   2
   1  -7  40 229.748 110.205   1
  -1  -7 -41 70.8240 99.5591   3
  -1  -7 -41 17.7273 87.0441   4
  -1   7 -41 26.1007 73.0339   3
  -1   7 -42 103.959 79.9932   3
  -1  -7 -42-50.9368 89.5877   4
  -1  -7 -42-87.5472 102.425   3
  -1  -7 -43 282.749 125.694   3
  -1   7 -43 146.265 92.9067   3
  -1  -8  37 49.5924 96.5869   4
  -1  -8  36 401.655 129.230   4
  -1  -8  36 692.894 144.261   1
   1  -8 -36 356.284 113.229   4
  -1   8  36 397.072 124.508   2
  -1  -8  35 428.403 125.343   4
  -1  -8  35 243.770 102.057   1
   1  -8 -35 297.236 108.759   4
  -1   8  35 213.751 104.881   2
   1  -8 -34 122.576 88.2262   4
  -1  -8  34 24.6514 80.4222   1
  -1   8  34 4.20572 83.7958   2
   1   8 -34 58.5538 77.5427   3
  -1  -8  34 176.900 108.181   4
  -1  -8  33-81.8299 91.2387   4
   1  -8 -33-45.1354 106.916   3
  -1   8  33-7.50710 76.3387   2
   1   8 -33-18.8672 74.0956   3
   1  -8 -33 222.088 93.4628   4
  -1  -8  33-108.328 88.6852   1
   1  -8 -32 263.746 98.4422   4
  -1  -8  32 157.039 90.1063   1
   1  -8 -32 225.665 116.247   3
  -1   8  32 184.443 103.286   2
  -1  -8  32 196.115 103.199   4
   1   8 -32 141.249 86.0908   3
   1  -8 -31 273.306 100.921   4
  -1  -8  31 23.1026 72.2148   1
  -1  -8  31 35.9361 88.3301   4
  -1   8  31 195.761 90.9629   2
   1   8 -31 47.0311 74.8050   3
  -1  -8  30 181.962 102.676   4
  -1   8  30 120.315 86.4858   2
   1  -8 -30 306.133 98.6740   4
   1  -8 -30 260.559 125.919   3
  -1  -8  30 202.169 100.176   1
   1   8 -30 93.2301 74.6886   3
  -1   8  29 203.228 85.2122   2
   1  -8 -29 388.488 134.702   3
   1  -8 -29 217.387 98.3120   4
  -1  -8  29 295.451 107.636   1
  -1  -8  29-37.6790 90.3046   4
   1   8 -29 206.079 93.5135   3
   1  -8 -28 910.123 142.425   4
  -1  -8  28 822.745 137.143   1
  -1  -8  28 722.027 140.670   4
   1  -8 -28 1271.39 195.275   3
   1   8 -28 933.660 148.147   3
  -1   8  28 1107.18 159.841   2
   1  -8 -27 685.009 122.802   4
  -1  -8  27 883.724 156.047   4
  -1   8  27 692.955 125.602   2
   1   8 -27 761.603 132.661   3
  -1  -8  27 652.397 122.889   1
  -1   8  26 271.142 110.518   3
  -1  -8  26 97.6672 78.9774   1
   1  -8 -26 72.8514 71.2949   4
  -1   8  26 97.5948 67.6881   2
   1   8 -26 223.862 93.4495   3
  -1   8  25 165.230 89.5927   3
  -1  -8  25-19.9124 83.0527   4
  -1  -8  25-42.7687 65.6102   1
  -1   8  25-92.8088 78.2544   2
   1  -8 -25 44.2478 76.0787   4
   1   8 -25 141.025 80.1639   3
  -1  -8  24 250.101 90.1784   1
  -1   8  24 183.227 98.1982   3
  -1  -8  24 263.303 102.656   4
   1  -8 -24 266.056 91.8047   4
  -1   8  24 277.419 94.2110   2
   1   8 -24 201.543 79.6431   3
  -1  -8  23 64.5188 75.1784   1
  -1  -8  23 107.231 91.3237   4
  -1   8  23 39.4963 64.0180   2
   1  -8 -23 172.520 84.0351   4
  -1   8  23-39.9585 80.5831   3
   1   8 -23 22.2202 71.3242   3
  -1   8  22 88.4097 80.7300   3
  -1  -8  22 69.4926 75.4613   4
  -1  -8  22 120.396 73.9960   1
   1   8 -22 145.303 83.9639   3
   1  -8 -22-79.3076 74.1725   4
  -1   8  22 73.2698 63.7445   2
  -1   8  21 64.3661 86.3207   3
   1  -8 -21 180.863 83.1615   4
  -1  -8  21 184.044 81.9349   1
  -1  -8  21 232.234 98.9576   4
  -1   8  21-13.2563 60.0370   2
   1   8 -21 133.382 80.5653   3
  -1  -8  20 271.585 103.688   4
  -1   8  20 42.3797 75.7840   3
   1  -8 -20 149.173 80.9951   4
  -1  -8  20 163.631 80.2092   1
  -1   8  20 111.951 68.4348   2
   1   8 -20 116.916 79.4621   3
  -1  -8  19 313.696 103.190   4
   1   8 -19 335.015 100.750   3
  -1  -8  19 399.018 92.1041   1
  -1   8  19 226.469 91.6506   3
  -1   8  19 238.773 79.6359   2
   1  -8 -19 516.641 115.565   4
  -1   8  18 220.427 90.8110   3
  -1  -8  18-7.12777 72.2624   4
   1  -8 -18 156.935 83.3364   4
  -1  -8  18 252.933 73.6346   1
  -1   8  18 162.931 72.2993   2
   1   8 -18 226.120 78.7644   3
  -1  -8  17-56.2733 84.9054   4
  -1   8  17 6.69733 66.2108   3
  -1  -8  17 13.6616 57.3692   1
   1  -8 -17-21.7458 69.6593   4
   1   8 -17 90.1764 77.8086   3
  -1  -8  16 184.071 89.1976   4
  -1  -8  16 52.5949 61.7754   1
  -1   8  16 110.205 81.2155   3
   1  -8 -16 285.001 94.1334   4
   1   8 -16 375.274 108.315   3
  -1   8  15 478.977 105.657   3
   1  -8 -15 500.453 104.994   4
  -1  -8  15 515.060 96.1229   1
  -1  -8  15 570.021 117.547   4
   1   8 -15 669.573 114.499   3
  -1   8  14 79.4007 76.3751   3
  -1  -8  14 109.184 77.5466   4
  -1  -8  14-6.23796 55.4864   1
   1  -8 -14 129.365 79.9170   4
   1   8 -14-54.9270 66.7267   3
  -1  -8  13 95.0146 81.7661   4
  -1   8  13 92.7294 82.3303   3
   1  -8 -13 47.5993 64.2712   4
  -1  -8  13 100.311 59.5539   1
   1   8 -13 86.6635 73.1479   3
  -1   8  12 87.1883 77.9950   3
  -1  -8  12 149.650 78.4016   4
   1  -8 -12-3.13523 66.7503   4
  -1  -8  12 10.8257 53.4332   1
   1   8 -12-3.50840 63.4990   3
  -1   8  11 7.60332 67.1582   3
  -1  -8  11 43.4887 67.8245   4
   1  -8 -11 46.7994 68.4861   4
  -1  -8  11 67.8587 56.0358   1
   1   8 -11 68.3733 66.7391   3
  -1   8  10-1.56234 75.3346   3
   1  -8 -10-24.2606 66.2856   4
  -1  -8  10 18.8693 68.5292   4
   1   8 -10 7.59853 69.2876   3
  -1  -8   9 215.299 90.4143   4
  -1   8   9 294.335 98.7538   3
   1  -8  -9 169.272 86.5122   4
   1   8  -9 88.8132 64.1395   3
  -1   8   8 102.784 69.4497   3
   1  -8  -8 92.9697 73.8666   4
  -1  -8   8 6.74880 67.1259   4
   1   8  -8-45.4075 64.6694   3
  -1  -8   7 209.736 88.1597   4
   1  -8  -7 124.205 76.0353   4
   1   8  -7 175.744 85.8225   3
  -1   8   7 141.542 74.1807   3
  -1   8   6-16.7631 66.8848   3
   1  -8  -6 179.930 76.4052   4
  -1  -8   6 66.0719 69.4222   4
   1   8  -6-11.0120 68.6916   3
   1   8  -5 70.9805 67.7161   3
  -1  -8   5-103.036 81.2039   4
   1  -8  -5-21.1259 71.1580   4
  -1   8   5 152.706 84.7897   3
  -1  -8   4 63.5572 72.8874   4
   1  -8  -4-19.2809 65.9300   4
   1   8  -4 150.764 75.9643   3
  -1   8   4 150.544 72.5554   3
   1   8  -3 61.9160 67.0785   3
  -1  -8   3 68.5042 65.5951   4
   1  -8  -3 262.109 99.2965   4
  -1   8   3 13.2622 68.6254   3
   1   8  -2 141.003 76.2197   3
  -1   8   2 269.207 90.7856   3
   1  -8  -2 169.588 78.8534   4
  -1  -8   2 298.728 101.093   4
  -1   8   1 239.599 83.9814   3
  -1  -8   1 92.6860 69.7934   4
   1  -8  -1 234.335 82.2166   4
   1   8  -1 295.086 93.9263   3
  -1   8   0 168.606 78.3999   3
  -1  -8   0 6.42101 64.4534   4
   1   8   0 95.9580 73.0235   3
   1  -8   0 113.390 74.3470   4
   1   8   1 302.097 82.3545   3
  -1   8  -1 463.594 108.951   3
   1  -8   1 520.907 112.356   4
  -1  -8  -1 333.969 90.1893   4
  -1   8  -2 355.356 100.591   3
  -1  -8  -2 314.942 92.4303   4
   1   8   2 288.641 88.1211   3
   1  -8   2 142.118 73.3226   4
  -1   8  -3 129.423 78.1375   3
   1   8   3 122.194 77.8658   3
   1  -8   3 178.153 89.9453   4
  -1  -8  -3 20.7196 63.6573   4
  -1   8  -4 96.8082 76.2871   3
   1   8   4-1.81642 63.0923   3
  -1  -8  -4-45.4015 70.7649   4
   1  -8   4 85.3272 83.9570   4
  -1   8  -5 84.7746 69.9166   3
   1   8   5 258.095 89.9107   3
   1  -8   5 155.693 73.9634   4
  -1  -8  -5 105.195 74.6801   4
  -1   8  -6 407.349 102.469   3
   1   8   6 362.581 100.264   3
  -1  -8  -6 487.378 110.663   4
   1  -8   6 258.897 92.8883   4
  -1   8  -7-20.6658 73.8341   3
   1   8   7 78.3721 73.7009   3
   1  -8   7 110.911 75.9863   4
  -1  -8  -7 135.536 78.6936   4
  -1   8  -8 81.9501 79.8879   3
   1   8   8-80.2749 64.8840   3
  -1  -8  -8-82.7736 77.0443   4
   1  -8   8 118.125 73.0965   4
  -1   8  -9-11.4991 64.4611   3
  -1  -8  -9-24.0015 64.6251   4
   1   8   9 96.1372 60.0265   2
   1  -8   9 248.603 94.4042   4
   1   8   9 145.225 69.8593   3
  -1  -8 -10 323.542 96.1612   4
   1   8  10 399.103 88.8089   2
   1   8  10 329.822 88.9867   3
   1  -8  10 338.932 101.292   4
  -1   8 -10 549.158 116.304   3
   1   8  11 703.726 109.515   3
   1  -8  11 573.938 115.978   4
   1   8  11 575.130 102.668   2
  -1   8 -11 652.948 125.278   3
  -1  -8 -11 799.039 124.915   4
  -1   8 -12 108.768 78.4674   3
   1   8  12 62.5402 71.8266   3
   1  -8  12 135.926 78.9256   4
  -1  -8 -12 12.4743 68.9792   4
   1   8  12 72.9186 70.1015   2
  -1   8 -13 7.29504 65.6021   3
   1  -8  13 108.780 85.9223   4
   1   8  13-8.32595 60.9020   3
   1   8  13 122.227 69.1858   2
  -1  -8 -13 64.4674 72.8412   4
  -1  -8 -14 125.883 80.3655   4
   1  -8  14 163.958 85.4891   4
  -1   8 -14 298.569 92.3023   3
   1   8  14 187.754 74.0129   2
   1   8  14 159.506 80.0576   3
   1   8  15 209.947 86.8780   3
  -1  -8 -15 122.889 66.4632   4
   1  -8  15 264.508 84.9328   4
   1   8  15 127.129 81.2604   2
  -1   8 -15 188.842 83.4796   3
   1   8  16 105.237 65.7695   3
  -1  -8 -16 151.235 80.6994   4
   1  -8  16 307.920 107.411   4
   1   8  16 242.271 86.0947   2
  -1   8 -16 181.636 87.5484   3
  -1   8 -17 626.538 122.310   3
   1  -8  17 548.500 128.375   4
   1   8  17 582.934 114.291   2
   1  -8  17 600.164 102.822   1
  -1  -8 -17 531.667 114.862   4
   1   8  17 629.975 117.555   3
   1  -8  18 201.359 77.5951   1
   1   8  18 174.861 89.5524   3
   1   8  18 294.686 98.2562   2
   1  -8  18 204.809 93.9696   4
  -1  -8 -18 211.298 88.6216   4
  -1   8 -18 143.875 81.9696   3
   1  -8  19 1.03819 62.7074   1
   1   8  19 46.8110 71.1689   3
   1  -8  19-40.4053 80.0438   4
  -1  -8 -19 176.505 84.3998   4
  -1   8 -19 110.058 87.7958   3
   1   8  19 28.8415 70.6381   2
   1  -8  20 52.7717 64.7537   1
   1   8  20-30.3265 71.1065   3
   1  -8  20 88.4595 86.2153   4
  -1  -8 -20 66.2419 71.8004   4
   1   8  20 81.9406 80.0457   2
  -1   8 -20 34.6336 72.4265   3
   1  -8  21 113.542 72.8515   1
   1   8  21-3.85629 75.7067   3
  -1  -8 -21 200.297 94.0759   4
   1   8  21 99.5836 72.1399   2
   1  -8  21 28.8840 78.3721   4
  -1   8 -21 127.885 88.0548   3
   1  -8  22 181.541 87.0701   1
   1   8  22-77.6508 75.5608   3
   1  -8  22 42.1417 85.2364   4
  -1  -8 -22 144.098 89.5785   4
   1   8  22 4.47369 75.2557   2
  -1   8 -22 90.6499 79.7657   3
   1  -8  23 150.760 98.1498   4
   1   8  23 134.121 75.6494   3
   1  -8  23 184.616 78.6202   1
   1   8  23 106.044 83.1519   2
  -1   8 -23 109.923 84.9718   3
  -1  -8 -23 124.492 82.2351   4
   1  -8  24 232.516 89.4495   1
   1   8  24 61.8960 72.7686   3
   1   8  24 271.729 110.360   2
   1  -8  24 23.1765 79.6208   4
  -1  -8 -24 101.531 78.6417   4
  -1   8 -24 89.6766 76.6813   3
   1  -8  25 43.2535 65.5053   1
   1  -8  25 190.262 91.4434   4
   1   8  25 73.0288 72.8422   3
   1   8  25 159.172 83.6346   2
  -1  -8 -25 84.8453 78.1444   4
  -1   8 -25-36.6545 79.1520   3
  -1  -8 -26-68.9103 83.7252   4
   1   8  26-44.3434 73.0831   3
   1  -8  26-116.967 89.6512   4
   1   8  26 66.9349 91.4445   2
   1  -8  26-32.2752 71.5288   1
  -1   8 -26-114.351 87.1699   3
   1   8  27 109.846 85.0197   3
   1  -8  27 93.9134 81.9241   1
  -1  -8 -27 139.243 88.9992   4
   1  -8  27-76.2338 101.351   4
   1   8  27 43.1418 83.5907   2
  -1   8 -27 88.7000 85.0759   3
   1   8  28 129.841 78.9216   3
   1  -8  28 88.9544 99.9866   4
  -1   8 -28 83.9083 86.5426   3
   1  -8  28 147.244 89.7226   1
  -1  -8 -28 23.1387 77.1327   4
   1   8  28 243.241 104.761   2
   1  -8  29 23.3116 74.8976   1
   1   8  29-84.9984 84.3313   3
  -1  -8 -29 87.9054 80.6530   4
  -1   8 -29-77.8302 80.9148   3
   1  -8  29 54.7387 83.1367   4
   1   8  29 135.466 95.4527   2
   1  -8  30 53.1233 71.0817   1
   1  -8  30 68.3294 91.6219   4
  -1  -8 -30 213.864 94.0079   4
   1   8  30-43.4397 70.0580   3
   1   8  30 188.489 114.890   2
  -1   8 -30 152.700 89.1285   3
   1  -8  31 91.2577 88.5666   1
  -1   8 -31 126.246 77.1319   3
  -1  -8 -31 105.851 92.3748   4
   1  -8  31 20.2354 101.560   4
   1   8  31 141.697 91.1582   2
   1  -8  32 96.6290 88.2652   1
  -1  -8 -32 194.996 95.0584   4
  -1   8 -32 106.034 85.0836   3
   1   8  32 87.4569 99.7856   2
  -1  -8 -32 40.7907 100.239   3
   1  -8  32-104.492 103.326   4
   1  -8  33 335.298 116.396   1
  -1   8 -33 109.887 89.5596   3
   1   8  33-16.9398 88.8119   2
  -1  -8 -33-105.344 89.9591   4
  -1  -8 -33-85.6609 107.947   3
   1  -8  33 173.634 105.712   4
   1  -8  34 262.803 102.264   1
   1   8  34 95.7312 103.142   2
  -1   8 -34 108.316 81.1998   3
  -1  -8 -34-93.4781 90.8597   4
  -1  -8 -34-189.228 119.714   3
   1  -8  35-40.9469 82.3107   1
  -1  -8 -35-6.88879 80.4072   4
  -1   8 -35 157.013 85.8229   3
  -1  -8 -35 80.2631 111.982   3
   1   8  35 0.81714 90.2420   2
   1  -8  36 115.043 106.842   1
  -1  -8 -36 141.224 110.834   3
  -1   8 -36 142.871 96.8390   3
  -1   8 -37 31.1370 77.8554   3
   1  -9 -30 120.357 91.6898   4
  -1  -9  30 168.779 97.9097   1
  -1  -9  29 388.941 114.813   1
   1  -9 -29 192.257 97.5613   4
  -1  -9  28 106.352 84.1846   1
   1  -9 -28 46.7322 85.1209   4
  -1  -9  27 660.567 134.891   1
   1  -9 -27 657.448 130.191   4
  -1  -9  26 186.777 110.116   4
  -1  -9  26 51.5752 80.9581   1
   1  -9 -26 84.7821 83.2455   4
   1  -9 -25 51.7309 76.4041   4
  -1  -9  25 7.92339 95.1968   4
  -1  -9  25 12.7253 77.0711   1
   1  -9 -24 97.9533 88.9665   4
   1   9 -24 123.547 89.6009   3
  -1  -9  24 392.844 126.600   4
  -1  -9  23 190.521 111.849   4
   1  -9 -23 1.27099 73.3906   4
  -1   9  23 117.455 107.096   3
   1   9 -23 104.659 84.1152   3
  -1   9  22 55.4598 78.6466   3
  -1  -9  22 120.821 100.443   4
   1  -9 -22-154.928 95.8640   4
   1   9 -22 148.726 93.9162   3
  -1   9  21-104.539 95.2451   3
   1  -9 -21 32.1260 75.5843   4
  -1  -9  21-77.0501 91.2093   4
   1   9 -21 68.1002 83.3628   3
   1  -9 -20 330.474 103.615   4
  -1   9  20 98.3282 83.1197   3
  -1  -9  20 127.767 87.5081   4
   1   9 -20 223.916 97.3306   3
  -1   9  19 113.277 89.8559   3
   1  -9 -19 178.188 89.7531   4
  -1  -9  19 34.8808 78.1107   4
   1   9 -19-34.0296 76.0645   3
  -1   9  18-178.971 95.2043   3
  -1  -9  18 42.8524 88.2814   4
   1  -9 -18 62.2906 80.1530   4
   1   9 -18-7.12215 76.4030   3
  -1   9  17 104.515 91.0411   3
   1  -9 -17 188.818 94.3145   4
  -1  -9  17 194.580 106.084   4
   1   9 -17-45.2143 73.7487   3
  -1   9  16 299.532 113.252   3
  -1  -9  16 298.768 106.300   4
   1  -9 -16 286.250 109.199   4
   1   9 -16 127.273 78.9904   3
  -1   9  15 111.735 87.6103   3
   1  -9 -15 199.443 89.8714   4
  -1  -9  15 87.9910 96.4111   4
   1   9 -15-37.4766 71.1261   3
  -1   9  14 42.6590 84.7293   3
  -1  -9  14 24.6615 81.2896   4
   1   9 -14 10.8739 78.1673   3
   1  -9 -14 198.196 94.1168   4
  -1   9  13 85.9664 82.7392   3
  -1  -9  13-14.5401 70.9853   4
   1  -9 -13 111.713 83.4939   4
   1   9 -13-14.5601 72.1457   3
  -1  -9  12 70.8405 89.7541   4
  -1   9  12 196.110 97.3860   3
   1  -9 -12 198.280 95.4751   4
   1   9 -12-82.0882 72.9148   3
   1  -9 -11 124.128 103.036   4
  -1  -9  11 162.050 99.3294   4
  -1   9  11 134.492 88.0834   3
   1   9 -11 9.24045 73.8253   3
   1   9 -10 128.508 88.7171   3
   1  -9 -10 322.079 109.967   4
  -1   9  10 159.660 90.5874   3
  -1  -9  10 65.7831 78.0911   4
  -1  -9   9 703.449 136.110   4
   1   9  -9 688.593 124.724   3
  -1   9   9 771.562 136.239   3
   1  -9  -9 854.020 138.005   4
   1   9  -8 205.240 92.0588   3
  -1   9   8 268.967 104.786   3
   1  -9  -8 73.9150 78.8141   4
  -1  -9   8 195.617 102.006   4
   1   9  -7 384.574 108.129   3
  -1   9   7 370.757 107.192   3
  -1  -9   7 420.224 117.081   4
   1  -9  -7 166.600 81.6475   4
   1   9  -6 183.465 87.3111   3
  -1   9   6 272.872 99.1501   3
  -1  -9   6 198.906 95.1042   4
   1  -9  -6 336.636 108.632   4
   1   9  -5 166.344 84.8915   3
  -1   9   5-28.3282 72.3896   3
  -1  -9   5-36.4516 76.3993   4
   1  -9  -5 232.415 103.748   4
   1   9  -4-30.1232 79.7378   3
  -1   9   4 85.0466 88.7714   3
   1  -9  -4 82.0352 82.6318   4
  -1  -9   4 111.814 86.9697   4
   1   9  -3 8.62611 77.6218   3
  -1   9   3 39.9978 81.9559   3
   1  -9  -3 145.476 86.0295   4
  -1  -9   3 68.7922 93.2720   4
   1  -9  -2 327.426 113.671   4
  -1   9   2 220.593 97.3024   3
   1   9  -2 46.4665 67.5495   3
  -1  -9   2 90.1181 83.9267   4
  -1   9   1 135.836 79.5817   3
   1   9  -1 30.4488 70.2550   3
   1  -9  -1 197.036 98.9239   4
  -1  -9   1 257.764 101.655   4
   1   9   0 309.068 94.8353   3
  -1   9   0 98.1339 78.1780   3
   1  -9   0 21.1129 73.3127   4
  -1  -9   0 55.4248 74.4946   4
  -1  -9  -1 221.744 91.3559   4
  -1   9  -1 295.632 101.807   3
   1   9   1 213.825 100.799   3
   1  -9   1 377.290 106.263   4
   1   9   2 102.603 83.1094   3
  -1   9  -2-84.2237 82.1297   3
   1  -9   2 88.0039 81.6368   4
  -1  -9  -2-17.8532 69.3928   4
   1   9   3 51.8228 75.3333   3
  -1   9  -3-5.05817 73.0867   3
   1  -9   3 175.007 90.3808   4
  -1  -9  -3 126.361 85.1073   4
  -1   9  -4 55.9350 80.9731   3
   1   9   4 0.10240 68.1422   3
   1  -9   4-30.8494 78.9884   4
  -1  -9  -4 136.605 92.7225   4
  -1   9  -5-33.8127 78.0442   3
   1   9   5 33.7428 72.1866   3
   1  -9   5 244.158 107.266   4
  -1  -9  -5 190.164 97.8519   4
  -1   9  -6 35.9370 81.3168   3
   1   9   6-13.1604 70.3973   3
  -1  -9  -6 47.1191 74.3499   4
   1  -9   6 45.5943 88.0023   4
   1  -9   7-153.760 85.7330   4
   1   9   7 90.4357 86.0941   3
  -1  -9  -7 126.107 83.0702   4
  -1   9  -7 192.778 99.4598   3
   1  -9   8 92.7149 82.8965   4
  -1  -9  -8 205.377 97.8605   4
   1   9   8 193.816 87.7074   3
  -1   9  -8 185.424 95.3696   3
  -1   9  -9 50.5820 74.3412   3
   1   9   9-3.65064 69.4567   3
   1  -9   9 173.948 96.1921   4
  -1  -9  -9 183.224 95.6732   4
  -1   9 -10-2.85592 71.7835   3
   1   9  10 114.836 72.9270   3
  -1  -9 -10 69.4180 77.7139   4
   1  -9  10 77.9557 84.5505   4
  -1   9 -11 157.326 93.5965   3
  -1  -9 -11 58.4908 85.1476   4
   1  -9  11 101.029 93.1541   4
   1   9  11 103.788 92.9966   3
  -1   9 -12 97.1606 84.9638   3
   1   9  12-14.1480 70.2683   3
   1  -9  12 61.4387 84.3416   4
  -1  -9 -12 110.866 76.1310   4
  -1   9 -13 2.99204 81.5134   3
   1   9  13 29.3320 68.0949   3
  -1  -9 -13 90.5830 87.0017   4
   1  -9  13 83.6335 83.2076   4
  -1   9 -14 234.176 100.066   3
   1   9  14 8.42312 76.6311   3
   1  -9  14 43.0391 81.1216   4
  -1  -9 -14 100.299 82.3977   4
   1   9  15 49.0566 76.2698   3
  -1  -9 -15 140.296 88.9064   4
  -1   9 -15-2.44663 74.7261   3
   1  -9  15 117.673 91.1031   4
  -1   9 -16 69.4898 89.2810   3
   1   9  16 59.2196 80.0441   3
   1  -9  16 95.8068 83.4960   4
  -1  -9 -16 362.427 109.521   4
  -1   9 -17-34.9946 76.7896   3
   1   9  17 19.4356 69.7446   3
   1  -9  17-125.127 102.407   4
  -1  -9 -17 170.643 100.332   4
   1   9  18-167.891 100.438   3
  -1   9 -18 118.276 83.2386   3
  -1  -9 -18-53.9468 74.3191   4
   1  -9  18 147.947 89.1462   4
  -1   9 -19 13.9704 71.5498   3
   1   9  19 71.8370 86.6925   3
  -1  -9 -19 137.036 89.1859   4
   1  -9  19 180.122 104.651   4
   1   9  20-1.11330 80.5362   3
   1  -9  20-30.6509 81.4296   4
  -1  -9 -20 113.560 85.6002   4
  -1   9 -20 142.438 95.4577   3
   1  -9  21 225.148 102.934   4
  -1  -9 -21-60.0645 79.9057   4
   1   9  21 194.506 95.4807   3
  -1   9 -21 78.5914 87.7341   3
   1   9  22 245.658 107.105   3
   1  -9  22 230.227 114.212   4
  -1  -9 -22 222.663 101.770   4
  -1   9 -22-39.9062 75.4989   3
   1   9  23 399.951 115.217   3
  -1  -9 -23 325.467 110.375   4
   1  -9  23 45.0234 100.674   4
   1   9  23 194.864 95.0604   2
  -1   9 -23 139.255 85.7420   3
   1   9  24 40.8396 75.7041   3
  -1  -9 -24 100.458 87.8104   4
   1   9  24 145.750 91.2372   2
  -1   9 -24-24.4773 82.1775   3
   1   9  25 142.070 94.9272   3
   1   9  25 200.237 96.7215   2
  -1   9 -25 98.5563 84.8530   3
   1   9  26 42.2424 79.2576   3
  -1   9 -26-48.3218 84.0206   3
   1   9  26 14.7087 85.1685   2
   1   9  27 128.856 103.325   2
  -1   9 -27 35.8524 88.0033   3
   1   9  28-45.0428 86.4325   2
   1   9  29 88.6902 106.741   2
   1 -10  -7 304.128 116.081   4
   1 -10  -6 17.7485 79.7850   4
   1 -10  -5 89.8741 90.2514   4
   1 -10  -4 32.3305 99.2888   4
   1 -10  -3 207.890 104.620   4
   1 -10  -2-145.386 99.4274   4
   1 -10  -1 220.192 103.882   4
   1 -10   0 288.735 104.713   4
  -2   0  58 35.2244 89.8227   2
  -2   0  57 64.3917 101.488   2
  -2   0  56 88.4867 86.2169   2
   2   0 -55 95.5684 91.6776   3
  -2   0  55 36.9818 90.0735   2
   2   0 -54 66.0190 89.3061   3
  -2   0  54 105.667 86.2577   2
  -2   0  53 90.6121 82.7986   1
   2   0 -53 26.8598 83.1687   3
  -2   0  53 82.2432 83.9411   2
  -2   0  52 102.387 74.1604   1
   2   0 -52 20.2074 74.2189   3
  -2   0  52 152.280 90.1304   2
  -2   0  51-145.015 86.2479   1
   2   0 -51 111.907 89.3358   3
  -2   0  51 28.8250 74.6593   2
  -2   0  50-36.3277 69.9961   1
   2   0 -50-135.635 93.4977   3
  -2   0  50 31.3526 74.4559   2
  -2   0  49-44.5905 65.9809   1
  -2   0  49 14.8791 73.6464   2
   2   0 -49-28.4342 76.5644   3
  -2   0  48 23.3882 68.0358   1
   2   0 -48-7.54719 79.3382   3
  -2   0  48 93.1053 84.0292   2
  -2   0  47 100.785 74.1421   1
   2   0 -47-11.0669 71.4895   3
  -2   0  47 123.434 81.8615   2
   2   0 -46-123.091 77.6074   3
  -2   0  46 65.8698 77.0245   2
  -2   0  46 111.049 69.0103   1
  -2   0  45-114.131 73.5464   1
   2   0 -45-2.31945 64.6577   3
  -2   0  44 13.1787 57.5971   1
   2   0 -44 155.956 83.2517   3
  -2   0  44-38.2580 64.6570   2
  -2   0  43 52.8400 61.9813   1
  -2   0  43 82.6329 72.5084   2
   2   0 -43 54.1444 79.2134   3
  -2   0  42 34.5656 53.0508   1
   2   0 -42 100.874 73.8541   3
  -2   0  42 1.06905 65.1664   2
  -2   0  41 0.61195 50.1205   1
   2   0 -41-35.7892 63.6786   3
  -2   0  41 133.379 68.1195   2
  -2   0  40-65.2675 60.1043   1
   2   0 -40 101.114 72.7220   3
  -2   0  40 30.0201 58.4677   2
   2   0 -39 108.484 72.2051   3
  -2   0  39 43.3520 56.5176   1
  -2   0  39-10.0324 56.6854   2
  -2   0  38 40.1500 50.0593   1
   2   0 -38-105.837 76.3727   3
  -2   0  38-15.5320 57.5038   2
  -2   0  37-24.1812 47.9211   1
   2   0 -37-44.5779 37.0502   4
   2   0 -37 28.7689 65.7903   3
  -2   0  37 60.0766 60.7187   2
   2   0 -36 507.285 63.6323   4
  -2   0  36 561.794 86.8697   1
  -2   0  36 525.177 93.9392   2
   2   0 -36 375.813 92.1343   3
  -2   0  35-54.0870 50.1920   1
   2   0 -35-27.8696 37.4057   4
   2   0 -35-2.47602 54.3757   3
  -2   0  35-53.6943 57.9550   2
  -2   0  34 224.949 66.1723   1
   2   0 -34 269.501 49.3399   4
   2   0 -34 58.2923 52.6282   3
  -2   0  34 209.381 69.0168   2
   2   0 -33 29.6792 32.3476   4
  -2   0  33 29.1573 44.7119   1
   2   0 -33-9.93081 60.3884   3
  -2   0  33 8.30060 48.9755   2
   2   0 -32 101.593 38.9273   4
  -2   0  32 86.8758 48.1672   1
   2   0 -32 69.1413 60.7598   3
  -2   0  32-19.0119 49.4532   2
   2   0 -31-33.8947 30.2129   4
   2   0 -31-11.4763 57.2707   3
  -2   0  31-18.3233 44.0330   1
  -2   0  31 30.5942 53.1076   2
   2   0 -30 38.5756 31.5100   4
   2   0 -30-28.0374 57.8890   3
  -2   0  30 6.57888 36.9647   1
  -2   0  30 9.10036 47.2818   2
   2   0 -29-52.0497 28.1279   4
  -2   0  29 2.54435 35.8117   1
  -2   0  29-7.57049 42.6735   2
   2   0 -29-45.5486 50.6102   3
   2   0 -28 9.69077 24.2350   4
  -2   0  28-18.6820 36.7033   1
   2   0 -28 27.1393 47.5056   3
  -2   0  28 104.734 50.8370   2
  -2   0  27 23.7046 37.7089   1
   2   0 -27-7.65598 24.8405   4
   2   0 -27-45.0562 54.0969   3
  -2   0  27 46.5623 48.9048   2
   2   0 -26 240.852 39.3808   4
  -2   0  26 212.207 49.4255   1
   2   0 -26 197.154 64.3428   3
  -2   0  26 248.887 59.5157   2
  -2   0  25-31.1519 35.4745   1
   2   0 -25-13.4196 22.4986   4
   2   0 -25-25.3325 45.8529   3
  -2   0  25-31.8620 42.8802   2
  -2   0  24 108.329 47.6105   1
   2   0 -24 152.659 56.9474   3
   2   0 -24 54.1356 24.5504   4
  -2   0  24 101.676 48.1027   2
  -2   0  23-6.55876 35.4253   1
   2   0 -23 11.6645 20.3931   4
   2   0 -23-64.3642 54.3962   3
  -2   0  23-40.3577 44.0207   2
   2   0 -22 137.188 26.4824   4
  -2   0  22 147.586 43.2622   1
   2   0 -22 111.473 54.5174   3
  -2   0  22 119.356 47.6960   2
   2   0 -21-21.7436 45.5692   3
   2   0 -21-44.8780 21.7279   4
  -2   0  21-18.7904 35.9307   1
  -2   0  21 1.28553 43.7468   2
   2   0 -20 2483.48 145.617   3
  -2   0  20 2672.78 142.590   2
   2   0 -20 2659.25 77.6958   4
  -2   0  20 2512.64 127.217   1
  -2   0  19-11.2594 37.3128   2
  -2   0  19 13.1189 33.1743   1
   2   0 -19-1.20744 16.2859   4
   2   0 -19 64.2511 47.5422   3
  -2   0  19 4.20629 18.9603   4
   2   0 -18 557.325 33.8595   4
   2   0 -18 547.145 78.4481   3
  -2   0  18 588.428 70.3400   2
  -2   0  18 562.069 65.4993   1
  -2   0  18 265.955 29.5909   4
   2   0 -17 40.5632 45.2840   3
  -2   0  17 2.07788 15.3200   4
   2   0 -17 14.3732 13.8479   4
  -2   0  17-41.0509 39.1813   1
  -2   0  17-7.99895 37.3943   2
  -2   0  16 1840.33 103.872   1
   2   0 -16 1905.37 120.900   3
   2   0 -16 1690.57 47.1727   4
  -2   0  16 1912.01 115.043   2
   2   0 -15-7.75787 9.34864   4
  -2   0  15-6.13201 32.2589   1
   2   0 -15-1.70641 40.2365   3
  -2   0  15 8.87319 9.64806   4
  -2   0  15-68.4756 47.1739   2
  -2   0  14 4661.53 153.961   1
  -2   0  14 4601.42 166.407   2
   2   0 -14 4566.50 163.243   3
  -2   0  13 1.84419 38.2740   2
   2   0 -13-6.65957 37.9903   3
  -2   0  13-27.1426 35.2082   1
   2   0 -12 1838.01 103.820   3
  -2   0  12 1886.80 99.7873   1
  -2   0  12 1789.78 102.884   2
  -2   0  11 43.1485 38.6927   2
   2   0 -11 21.4531 39.2526   3
  -2   0  11-16.1556 32.5616   1
  -2   0  10 5036.65 161.439   2
  -2   0  10 5388.13 160.087   1
   2   0 -10 5127.12 154.637   3
  -2   0   9-12.7390 38.3284   2
   2   0  -9-18.9637 39.6976   3
  -2   0   9-49.9750 36.7238   1
   2   0  -8 1905.70 91.1726   3
  -2   0   8 2023.24 99.1707   1
  -2   0   8 1992.27 102.041   2
  -2   0   7 9.71419 32.4260   2
   2   0  -7-57.5339 38.5375   3
  -2   0   7-7.49890 31.9409   1
  -2   0   6 4694.37 146.628   2
  -2   0   6 4859.53 142.863   1
   2   0  -6 4807.12 129.531   3
  -2   0   5-9.17660 11.6706   4
  -2   0   5-15.1200 31.3059   1
  -2   0   5-12.8820 35.0308   2
   2   0  -5 20.3149 10.9638   4
   2   0  -5 23.5070 31.5272   3
   2   0  -4 10223.7 106.380   4
  -2   0   4 9912.84 110.785   4
   2   0  -4 10211.4 170.567   3
  -2   0   4 10053.2 206.865   2
  -2   0   4 10411.2 200.605   1
  -2   0   3 23.8708 35.2061   1
   2   0  -3-2.30800 13.9598   4
  -2   0   3 1.53037 18.5967   4
   2   0  -3 4.25701 26.4637   3
   2   0  -3-12.1342 32.5608   2
  -2   0   2 1779.99 70.7884   3
   2   0  -2 1983.16 98.1989   2
  -2   0   2 1965.84 91.6226   1
   2   0  -2 1900.17 57.2943   4
   2   0  -2 2081.99 70.3753   3
  -2   0   2 2078.33 60.2860   4
  -2   0   1 11.1952 20.9311   4
   2   0  -1 8.74497 34.6187   2
  -2   0   1 8.92989 23.8888   3
   2   0  -1-8.80108 20.7580   3
  -2   0   1 49.0062 36.9285   1
   2   0  -1-35.1618 20.2636   4
  -2   0   0 4245.09 130.670   1
  -2   0   0 4395.90 95.3286   3
   2   0   0 4322.84 97.5119   4
  -2   0   0 4530.64 100.702   4
   2   0   0 4097.59 134.601   2
   2   0   0 4435.62 86.8492   3
   2   0   1 38.9211 37.1752   2
  -2   0  -1 10.8516 31.7852   1
  -2   0  -1 14.9686 24.1961   4
   2   0   1-8.93751 17.3349   3
  -2   0  -1 15.1078 20.5185   3
  -2   0  -2 15815.1 251.024   1
  -2   0  -2 16037.1 208.926   4
   2   0   2 16354.9 265.093   2
  -2   0  -2 15953.5 151.305   3
   2   0   2 16236.1 134.646   3
  -2   0  -3-20.4485 30.8680   1
  -2   0  -3 16.4788 28.4121   4
   2   0   3 33.3333 41.2597   2
   2   0   3-5.98382 10.9490   3
  -2   0  -4 7222.93 153.325   4
   2   0   4 7522.82 179.729   2
  -2   0  -4 7256.84 173.072   1
  -2   0  -5-30.5387 30.4115   4
  -2   0  -5 3.41584 31.3095   1
   2   0   5-1.27036 32.4575   2
  -2   0  -6 3831.86 131.526   1
   2   0   6 4411.08 136.542   2
  -2   0  -6 4093.06 125.344   4
  -2   0  -7-25.4261 33.3478   4
   2   0   7-14.9677 34.9602   2
  -2   0  -7 36.0052 33.5708   1
   2   0   8 9465.44 197.483   2
  -2   0  -8 8841.79 195.261   4
  -2   0  -8 8663.63 202.869   1
  -2   0  -9 0.17645 32.0692   4
   2   0   9-25.2370 34.7573   2
  -2   0  -9 4.66540 36.1084   1
   2   0  10 2855.90 113.668   2
  -2   0 -10 2668.09 119.349   1
  -2   0 -10 2766.53 121.062   4
   2   0  11-10.3450 33.1704   2
  -2   0 -11-37.5655 35.9732   4
  -2   0 -11 31.4856 36.8322   1
  -2   0 -12 1603.63 96.9177   1
  -2   0 -12 1309.64 42.4323   3
   2   0  12 1620.12 89.0287   2
  -2   0 -12 1610.87 98.1853   4
  -2   0 -13-14.8803 36.4107   1
  -2   0 -13-6.28800 13.8012   3
   2   0  13-53.5832 36.3161   2
  -2   0 -13 19.9615 37.1126   4
  -2   0 -13-22.5589 15.5332   3
  -2   0 -14 1901.93 109.144   4
   2   0  14 1921.67 99.9058   2
  -2   0 -14 1890.02 59.4034   3
  -2   0 -14 1328.37 50.6933   3
  -2   0 -15-23.7223 20.1413   3
  -2   0 -15-5.71132 37.6725   4
   2   0  15 14.7134 32.7404   2
   2   0  15 39.1233 39.8540   1
  -2   0 -15-1.80457 19.1300   3
  -2   0 -16 9719.79 150.297   3
  -2   0 -16 9766.27 247.506   4
   2   0  16 8884.43 239.954   1
   2   0  16 9344.99 218.799   2
   2   0  17-32.0935 40.0702   1
  -2   0 -17 19.3627 40.4827   4
   2   0  17 24.0610 35.6103   2
  -2   0 -17-12.7951 23.1235   3
   2   0  18 1235.76 100.960   1
   2   0  18 1498.20 96.5142   2
  -2   0 -18 1417.95 66.8623   3
  -2   0 -18 1374.92 107.731   4
   2   0  19 4.01997 37.8158   1
  -2   0 -19-25.2930 42.3015   4
   2   0  19 68.0555 37.4910   2
  -2   0 -19-14.2176 24.7272   3
  -2   0 -20 195.820 54.9577   4
  -2   0 -20 194.125 34.8332   3
   2   0  20 137.669 46.5968   1
   2   0  20 126.060 43.3883   2
   2   0  21-36.1918 35.9563   1
   2   0  21 19.4840 35.7297   2
  -2   0 -21 31.7397 42.8872   4
  -2   0 -21 34.6402 26.4911   3
  -2   0 -22 675.561 86.4667   4
  -2   0 -22 598.962 55.6169   3
   2   0  22 590.244 75.5937   1
   2   0  22 717.629 77.0704   2
   2   0  23 6.55137 38.5737   1
  -2   0 -23-1.68824 47.5592   4
   2   0  23 8.05752 36.1864   2
  -2   0 -23-33.2688 31.0305   3
   2   0  24 214.202 55.2359   1
  -2   0 -24 221.073 61.5852   4
  -2   0 -24 188.954 38.8123   3
   2   0  24 267.079 56.8486   2
  -2   0 -25 17.0871 40.9535   4
   2   0  25 20.2947 38.5448   1
   2   0  25-55.8105 45.5150   2
  -2   0 -25-47.4263 34.5219   3
   2   0  26 170.539 59.9489   1
   2   0  26 26.3056 41.0424   2
  -2   0 -26 39.6515 48.8003   4
  -2   0 -26 55.0587 37.1926   3
   2   0  27 31.5652 45.1222   1
  -2   0 -27 11.1641 44.1762   4
  -2   0 -27-7.38962 34.6923   3
   2   0  27 35.2669 42.7854   2
   2   0  28 2585.46 161.961   1
   2   0  28 2862.85 159.652   2
  -2   0 -28 2576.69 126.239   3
  -2   0 -28 2816.91 168.080   4
  -2   0 -29-56.0473 52.4744   4
   2   0  29-32.0962 46.1208   1
   2   0  29 49.5559 48.7478   2
  -2   0 -29-20.2441 38.5275   3
  -2   0 -30 146.898 62.7792   4
   2   0  30 80.0239 57.9609   1
   2   0  30 225.416 60.1288   2
  -2   0 -30 113.192 43.2948   3
  -2   0 -31 48.5019 58.8270   4
   2   0  31 37.1365 57.6740   1
   2   0  31-18.1340 45.5105   2
  -2   0 -31-18.7049 37.4219   3
  -2   0 -32 88.1480 53.0925   4
   2   0  32 141.251 60.4064   2
   2   0  32 32.3022 49.7397   1
  -2   0 -32 86.3633 44.5927   3
   2   0  33-1.20132 54.7668   1
  -2   0 -33 37.3074 57.8483   4
   2   0  33-38.3497 55.7634   2
  -2   0 -33 38.0936 40.1240   3
  -2   0 -34 3154.92 195.351   4
   2   0  34 3106.01 193.561   1
   2   0  34 3432.50 192.384   2
  -2   0 -34 2706.08 146.577   3
  -2   0 -35 3.78676 46.5541   3
   2   0  35-31.2986 55.0343   2
  -2   0 -35 5.24279 51.6810   4
   2   0  35-85.0843 66.3490   1
   2   0  36 304.023 80.9624   1
  -2   0 -36 370.886 83.7998   4
  -2   0 -36 321.898 64.6997   3
   2   0  36 458.582 88.2255   2
   2   0  37 112.921 70.3197   1
   2   0  37 2.72223 54.2319   2
  -2   0 -37 55.6098 62.3751   4
  -2   0 -37-27.9340 42.7025   3
  -2   0 -38 453.676 91.9784   4
   2   0  38 260.848 85.7050   1
   2   0  38 325.305 81.2771   2
  -2   0 -38 379.875 72.4210   3
   2   0  39-105.367 70.6825   2
   2   0  39 49.9912 73.0356   1
  -2   0 -39-52.8630 58.4453   4
  -2   0 -39-44.4125 48.8272   3
   2   0  40 119.981 72.8167   1
  -2   0 -40 66.9135 63.2670   4
   2   0  40-65.3452 67.1288   2
  -2   0 -40 51.4870 46.2117   3
   2   0  41-86.3200 75.9306   1
   2   0  41 37.1351 65.5643   2
  -2   0 -41 61.8529 57.7766   3
  -2   0 -41 144.089 66.4047   4
   2   0  42-20.6060 64.7603   1
  -2   0 -42 96.7049 68.9561   4
   2   0  42 23.4907 63.1440   2
  -2   0 -43 12.9536 60.5545   4
   2   0  43-29.4137 70.8135   2
   2   0  43-56.4007 69.1470   1
   2   0  44 140.034 82.4253   1
  -2   0 -44-54.7508 68.7527   4
   2   0  44 15.1908 62.8084   2
  -2   0 -45 106.012 74.6714   4
   2   0  45-92.8305 75.6426   2
   2   0  45-17.9981 70.9759   1
  -2   0 -46-10.4234 67.2010   4
   2   0  46 76.4433 71.9774   2
   2   0  46 24.0252 76.1189   1
   2   0  47 67.0922 64.9370   2
  -2   0 -47 82.9758 63.8272   4
   2   0  47 70.2159 84.6369   1
   2   0  48-4.67531 81.3097   1
  -2   0 -48-128.807 86.6116   4
   2   0  48 5.08543 71.3496   2
  -2   0 -49-28.8710 71.3223   4
   2   0  49 135.596 87.3378   2
   2   0  49-12.9861 79.8796   1
   2   0  50-8.58813 74.2396   2
  -2   0 -50 80.6689 81.0320   4
   2   0  50 45.4410 79.4563   1
  -2   0 -51-54.8972 75.0660   4
   2   0  51-106.202 89.3298   1
   2   0  51-68.2368 76.8223   2
   2   0  52-2.48621 77.1317   1
   2   0  52 143.829 94.6641   2
  -2   0 -52-21.5230 70.6404   4
  -2   0 -53 63.7487 72.1986   4
   2   0  53-6.12443 80.1390   1
  -2   0 -54 125.587 92.4256   4
   2   0  54 105.861 101.877   1
  -2   0 -55-1.14154 82.6025   4
   2   0  55 142.295 105.409   1
  -2   0 -56-61.6957 89.4450   4
   2   0  56 130.385 109.775   1
   2   0  57 230.160 118.144   1
  -2  -1  57-10.3675 79.0952   1
  -2  -1  56 261.744 108.738   1
  -2   1  56 234.156 117.470   2
  -2  -1  55 652.031 143.234   1
   2  -1 -55 503.034 133.738   3
  -2  -1  55 620.574 137.908   2
   2   1 -55 596.714 135.323   3
  -2   1  55 661.935 139.169   2
  -2  -1  54 1925.80 205.505   2
  -2  -1  54 1866.47 210.966   1
   2  -1 -54 1782.47 210.365   3
  -2   1  54 1489.73 193.484   2
   2   1 -54 1925.88 217.957   3
   2   1 -53 349.922 115.183   3
  -2  -1  53 382.391 114.547   1
   2  -1 -53 308.008 110.119   3
  -2   1  53 123.429 83.6130   2
  -2  -1  53 322.049 102.346   2
   2  -1 -52 235.669 97.9551   3
  -2  -1  52 221.356 94.7847   1
   2   1 -52 330.806 112.021   3
  -2   1  52 243.134 110.955   2
  -2  -1  52 219.280 93.1636   2
   2  -1 -51 64.4483 77.2788   3
  -2  -1  51 151.718 89.5971   1
   2   1 -51 60.3259 74.3143   3
  -2   1  51 156.304 99.1923   2
  -2  -1  51 209.869 99.6558   2
  -2  -1  50 96.7868 73.7062   1
   2  -1 -50 176.832 100.720   3
   2   1 -50 61.2198 90.3943   3
  -2   1  50-99.3360 88.8964   2
  -2  -1  50 214.389 93.0683   2
  -2  -1  49 55.1821 73.7848   2
  -2   1  49 16.2248 75.2678   2
   2  -1 -49 53.7845 81.0148   3
   2   1 -49 73.1638 80.0425   3
  -2  -1  49-9.72438 69.1119   1
  -2  -1  48-67.7459 69.7664   1
   2  -1 -48-155.980 88.7111   3
   2   1 -48-57.7518 70.6303   3
  -2   1  48-100.906 88.2929   2
  -2  -1  48-110.152 81.8318   2
  -2  -1  47-101.008 66.5975   1
  -2   1  47 59.9365 84.4382   2
   2  -1 -47 35.8622 74.2860   3
   2   1 -47 67.7240 75.3358   3
  -2  -1  47 138.421 78.9188   2
   2  -1 -46 42.1855 73.0183   3
  -2   1  46 14.2129 55.7200   1
  -2  -1  46 112.688 79.3743   1
   2   1 -46 23.3931 72.9911   3
  -2   1  46-34.4894 73.3903   2
  -2  -1  46 90.6042 70.7725   2
   2   1 -45 32.9324 65.3234   3
  -2   1  45 14.0255 54.0728   1
  -2  -1  45 145.841 75.5717   1
   2  -1 -45 33.1052 74.1103   3
  -2   1  45-29.2926 78.3841   2
  -2  -1  45 21.6896 71.2007   2
   2  -1 -44 33.9939 76.1103   3
  -2  -1  44 154.802 70.8325   1
   2   1 -44 175.315 88.1641   3
  -2   1  44 50.1304 58.0824   1
  -2   1  44-75.4462 76.9277   2
  -2  -1  44 83.0390 72.9598   2
  -2   1  43-0.06522 53.7393   1
  -2  -1  43-20.0384 61.3136   1
   2  -1 -43 46.5450 62.0751   3
   2   1 -43-61.1326 66.7648   3
  -2   1  43-15.1554 66.8285   2
  -2  -1  43 94.8834 68.6472   2
  -2  -1  42-44.8586 62.2366   1
  -2   1  42-65.8676 57.8283   1
   2  -1 -42-104.533 68.4920   3
  -2  -1  42-54.8064 63.5554   2
   2   1 -42 112.502 75.2848   3
  -2   1  42-22.0663 71.3219   2
  -2   1  41 51.4628 51.1195   1
  -2  -1  41 67.9772 72.5506   1
   2  -1 -41 8.92243 76.2644   3
   2   1 -41-14.3242 68.2978   3
  -2  -1  41-82.4978 66.1403   2
  -2   1  41-33.7387 65.3089   2
  -2   1  40 51.8345 49.4626   1
  -2  -1  40 63.4582 56.8157   1
   2  -1 -40 13.9346 64.4299   3
   2   1 -40 85.5287 63.5829   3
  -2   1  40 1.89644 61.4953   2
  -2  -1  40 23.2339 56.1480   2
  -2  -1  39 24.0720 58.8134   1
  -2   1  39 29.3218 51.6115   1
   2  -1 -39-14.5247 59.5669   3
   2   1 -39-27.1874 69.7403   3
  -2   1  39 55.1872 71.1471   2
  -2  -1  39-26.8014 61.8284   2
  -2  -1  38 42.3842 53.1552   1
   2  -1 -38 177.865 84.7791   3
   2   1 -38 186.767 77.7101   3
  -2   1  38 295.965 86.0161   2
  -2  -1  38 141.284 66.0285   2
  -2   1  38 177.193 61.3645   1
  -2   1  37 135.797 57.0823   1
  -2  -1  37 40.7325 52.8909   1
   2   1 -37 173.699 47.2982   4
   2  -1 -37 255.816 83.6565   3
   2   1 -37 95.4575 59.0405   3
  -2  -1  37 156.666 64.9850   2
   2  -1 -36 1516.92 100.434   4
  -2   1  36 1455.32 120.848   1
  -2  -1  36 1290.00 128.358   1
   2  -1 -36 1448.64 150.702   3
   2   1 -36 1377.40 142.271   3
  -2  -1  36 1497.76 137.551   2
   2   1 -36 1443.35 98.5759   4
  -2   1  36 1398.99 141.744   2
   2  -1 -35 805.392 74.6100   4
  -2  -1  35 863.175 110.101   1
  -2   1  35 915.235 98.1842   1
  -2  -1  35 871.685 108.843   2
   2   1 -35 901.961 121.505   3
  -2   1  35 947.276 123.891   2
   2  -1 -35 913.659 125.212   3
   2   1 -35 926.860 81.8418   4
  -2   1  34-25.8258 41.2069   1
   2  -1 -34-41.4376 72.0206   3
   2   1 -34-10.9570 34.2623   4
   2  -1 -34-22.6215 30.6546   4
  -2  -1  34 31.6382 54.6006   1
   2   1 -34 51.8571 63.1513   3
  -2   1  34 64.7787 68.1735   2
  -2  -1  34-8.22157 48.5448   2
   2  -1 -33 1058.83 127.713   3
   2  -1 -33 1048.31 79.8177   4
  -2  -1  33 896.571 106.816   1
   2   1 -33 1108.90 83.3379   4
  -2   1  33 1130.02 123.506   2
   2   1 -33 1014.96 119.491   3
  -2  -1  33 1198.10 118.028   2
  -2   1  33 1004.82 99.9551   1
  -2   1  32 890.993 111.945   2
   2  -1 -32 927.289 72.7483   4
  -2   1  32 795.425 88.2534   1
   2   1 -32 928.067 75.9650   4
  -2  -1  32 769.015 99.2297   1
   2  -1 -32 709.073 102.295   3
  -2  -1  32 868.979 102.167   2
   2   1 -32 948.643 115.356   3
   2  -1 -31 54.3897 30.2729   4
   2  -1 -31 25.3128 58.6112   3
   2   1 -31 8.12988 30.1653   4
  -2   1  31 8.41032 36.4122   1
   2   1 -31 12.8351 53.3314   3
  -2   1  31 44.7545 56.6353   2
  -2  -1  31-5.94929 46.8512   1
  -2  -1  31 16.7905 49.2431   2
  -2   1  30 62.1472 38.8105   1
   2   1 -30 110.485 56.7559   3
   2  -1 -30 132.683 37.8421   4
  -2   1  30 7.27842 47.6293   2
   2  -1 -30 71.8126 53.6192   3
   2   1 -30 105.663 36.1814   4
  -2  -1  30 46.9532 46.5892   1
  -2  -1  30 58.5147 47.2969   2
  -2   1  29 92.6350 42.8301   1
   2   1 -29-3.09222 51.4566   3
   2  -1 -29-4.51929 28.4816   4
   2   1 -29 44.9570 30.3921   4
   2  -1 -29 43.5660 58.1944   3
  -2  -1  29 21.2276 48.5387   1
  -2   1  29 45.7919 55.8781   2
  -2  -1  29-12.9953 43.1361   2
   2  -1 -28 265.184 41.4298   4
  -2   1  28 233.099 52.6043   1
  -2   1  28 201.202 66.7673   2
  -2  -1  28 252.282 64.7699   1
   2  -1 -28 194.113 65.1699   3
   2   1 -28 197.330 62.0088   3
   2   1 -28 198.764 39.7993   4
  -2  -1  28 234.201 63.8963   2
  -2   1  27 884.132 84.2440   1
  -2  -1  27 719.619 88.6764   1
  -2  -1  27 712.394 87.3119   2
   2  -1 -27 701.467 98.2532   3
   2  -1 -27 831.259 62.7196   4
   2   1 -27 893.501 65.9160   4
  -2   1  27 820.000 99.4666   2
   2   1 -27 702.018 90.9991   3
   2  -1 -26 693.945 95.2721   3
  -2  -1  26 591.076 79.1320   1
  -2   1  26 697.059 74.8838   1
   2   1 -26 785.512 60.5065   4
  -2   1  26 635.189 84.6759   2
   2   1 -26 671.084 92.3370   3
  -2  -1  26 758.028 87.2969   2
   2  -1 -26 772.568 56.8183   4
   2  -1 -25 69.2457 27.8437   4
  -2   1  25 10.4555 36.3116   1
   2   1 -25 4.93295 24.2112   4
  -2  -1  25 52.7234 41.5093   2
  -2  -1  25 38.6513 39.9580   1
   2  -1 -25 50.4109 49.9939   3
   2   1 -25-46.3674 43.6028   3
  -2   1  25 79.1097 53.1063   2
   2  -1 -24 108.872 53.1840   3
  -2   1  24 75.1738 35.9694   1
   2   1 -24 114.463 29.1880   4
  -2  -1  24 64.8643 42.4785   1
   2  -1 -24 78.8102 27.3731   4
   2   1 -24 53.9560 43.7662   3
  -2   1  24 150.280 54.0073   2
  -2  -1  24 139.944 56.3902   2
   2  -1 -23 327.042 69.5272   3
   2   1 -23 243.402 37.2987   4
  -2   1  23 244.694 47.7065   1
  -2  -1  23 303.393 58.9771   1
   2  -1 -23 289.251 38.8151   4
   2   1 -23 252.478 62.9470   3
  -2   1  23 248.778 59.8018   2
  -2  -1  23 388.916 66.7949   2
  -2  -1  22 469.799 69.4853   1
   2  -1 -22 417.877 73.4587   3
   2   1 -22 524.297 46.7154   4
   2  -1 -22 508.035 43.3619   4
  -2  -1  22 585.863 74.4330   2
  -2   1  22 526.154 76.8017   2
   2   1 -22 580.800 79.8187   3
  -2   1  22 448.330 57.2534   1
  -2  -1  21 96.1823 44.0896   2
  -2  -1  21 164.156 52.3757   1
   2  -1 -21 140.917 28.5905   4
   2   1 -21 78.5310 24.4844   4
   2  -1 -21 53.9982 45.5629   3
   2   1 -21 107.172 52.8625   3
  -2   1  21 147.991 40.9044   1
  -2   1  21 80.7788 43.1913   2
   2  -1 -20 969.866 51.9724   4
   2   1 -20 913.879 54.9369   4
  -2  -1  20 919.299 87.9277   1
  -2   1  20 968.474 92.5156   2
   2  -1 -20 778.221 86.7134   3
  -2   1  20 973.197 76.9731   1
   2   1 -20 980.440 93.9918   3
  -2  -1  20 898.698 86.4164   2
  -2   1  19 495.763 58.9097   1
  -2   1  19 440.477 67.6252   2
   2   1 -19 492.887 41.0783   4
  -2  -1  19 478.455 66.1824   1
   2  -1 -19 475.138 74.1489   3
  -2  -1  19 410.202 60.9877   2
   2   1 -19 374.314 65.0017   3
   2  -1 -19 478.577 37.0984   4
  -2  -1  18 21.6572 39.8142   2
   2  -1 -18-1.78447 17.4652   4
  -2   1  18 15.7507 19.6024   4
  -2   1  18 3.89150 30.0968   1
   2   1 -18-3.43590 19.4946   4
  -2  -1  18-16.9242 37.4515   1
   2  -1 -18 50.8484 51.2268   3
   2   1 -18-23.8427 40.2508   3
  -2   1  18 54.7141 46.7522   2
  -2  -1  17 191.408 47.7571   2
  -2   1  17 107.920 22.3540   4
  -2  -1  17 175.930 50.5146   1
   2  -1 -17 149.128 22.3623   4
  -2   1  17 158.077 52.7704   2
  -2   1  17 191.523 43.3377   1
   2   1 -17 178.711 27.3807   4
   2  -1 -17 172.847 50.1700   3
   2   1 -17 205.846 53.4919   3
  -2  -1  16 100.788 37.6122   2
  -2   1  16 98.8256 38.2289   1
  -2   1  16 33.1449 16.8161   4
   2  -1 -16 120.245 48.4445   3
   2   1 -16 64.1644 22.4642   4
   2  -1 -16 80.2637 19.3885   4
  -2  -1  16 77.2930 36.4508   1
   2   1 -16 87.8956 42.7210   3
  -2   1  16 28.4349 40.1797   2
  -2  -1  15 292.507 51.7089   2
  -2  -1  15 183.676 27.4094   4
  -2  -1  15 357.949 61.0202   1
   2  -1 -15 300.571 55.0995   3
  -2   1  15 314.093 58.9056   2
   2  -1 -15 315.055 26.0714   4
  -2   1  15 354.870 47.9464   1
  -2   1  15 147.825 20.8503   4
   2   1 -15 324.024 56.9614   3
   2  -1 -14 1061.37 40.2281   4
  -2   1  14 551.561 30.9843   4
  -2   1  14 1331.74 79.8873   1
  -2  -1  14 1149.87 54.1612   4
  -2  -1  14 724.277 43.9784   4
   2  -1 -14 983.707 91.5596   3
  -2  -1  14 1188.96 87.9880   1
   2   1 -14 989.726 81.7020   3
  -2   1  14 1129.07 90.2985   2
  -2  -1  14 1093.43 84.5677   2
   2  -1 -13 387.685 25.5465   4
  -2   1  13 462.555 64.6806   2
  -2  -1  13 489.509 36.9217   4
  -2  -1  13 431.239 59.3151   1
   2  -1 -13 374.142 63.1318   3
   2   1 -13 454.041 61.6223   3
  -2  -1  13 418.901 55.8610   2
  -2   1  13 168.201 19.0713   4
  -2   1  13 453.784 49.4450   1
  -2  -1  13 307.800 32.1749   4
  -2  -1  12 412.273 55.4568   1
   2  -1 -12 402.641 24.1264   4
  -2  -1  12 326.927 32.2370   4
  -2  -1  12 382.060 33.3029   4
   2  -1 -12 414.267 63.7167   3
   2   1 -12 434.477 60.5496   3
  -2   1  12 427.946 56.6343   2
  -2   1  12 477.941 51.7287   1
  -2  -1  12 409.837 55.6604   2
  -2  -1  11 253.816 48.6085   2
   2  -1 -11 225.889 18.1983   4
  -2  -1  11 264.843 29.3675   4
   2  -1 -11 165.934 17.3189   4
   2  -1 -11 228.131 51.1851   3
  -2  -1  11 165.393 25.8124   4
  -2   1  11 308.278 45.7983   1
   2   1 -11 239.476 45.8856   3
  -2   1  11 325.795 54.6490   2
  -2  -1  11 206.583 46.8449   1
  -2   1  10 1641.39 95.8370   2
   2  -1 -10 1364.33 94.1036   3
  -2  -1  10 1423.62 95.7229   1
  -2  -1  10 1123.47 49.7183   4
   2  -1 -10 1305.47 38.6016   4
  -2  -1  10 1418.61 55.1228   4
   2   1 -10 1395.05 83.4706   3
   2  -1 -10 1340.22 38.4085   4
  -2  -1  10 1535.63 93.5033   2
  -2   1  10 1540.09 81.9149   1
   2   1  -9 568.232 56.2647   3
  -2  -1   9 553.150 36.4523   4
   2  -1  -9 506.794 26.1394   4
  -2  -1   9 417.901 32.2573   4
  -2  -1   9 502.724 61.5215   1
   2  -1  -9 505.313 61.7833   3
  -2   1   9 547.731 62.1433   2
  -2   1   9 585.928 53.5919   1
  -2  -1   9 601.351 63.3200   2
   2  -1  -9 496.243 25.0284   4
  -2  -1   8 80.8401 22.3659   4
   2  -1  -8 99.4049 16.7551   4
   2  -1  -8 109.290 16.4104   4
  -2  -1   8 80.7774 43.3800   1
   2  -1  -8 115.328 39.8333   3
  -2  -1   8 89.4069 23.6089   4
  -2   1   8 149.989 36.4511   1
   2   1  -8 88.3333 35.3551   3
  -2   1   8 127.844 41.6538   2
  -2   1   7 238.933 45.2697   2
  -2   1   7 298.282 42.1651   1
   2  -1  -7 225.704 21.5650   4
   2  -1  -7 203.307 22.1386   4
  -2  -1   7 206.111 27.8256   4
   2   1  -7 211.673 47.1061   2
   2   1  -7 230.773 31.3734   4
   2  -1  -7 192.547 42.3249   3
  -2  -1   7 258.861 52.2586   1
   2   1  -7 249.381 39.8115   3
   2   1  -6 127.721 26.6076   4
   2   1  -6 132.213 39.1012   2
   2  -1  -6 143.766 21.3371   4
  -2   1   6 139.544 41.6890   2
  -2   1   6 157.712 37.2334   1
   2  -1  -6 148.625 23.2080   4
  -2  -1   6 99.7079 24.3880   4
   2  -1  -6 139.954 39.4486   3
  -2  -1   6 144.951 44.5248   1
   2   1  -6 163.071 38.0214   3
  -2   1   5 69.5299 37.4875   2
   2   1  -5 2.66835 20.8215   4
  -2  -1   5 10.1778 21.4564   4
   2  -1  -5 4.55234 16.1063   4
  -2   1   5-23.9440 29.9660   1
  -2   1   5-12.6028 18.1536   4
   2  -1  -5 0.91295 33.4263   3
   2   1  -5-20.4609 39.2962   2
   2   1  -5 3.70266 29.6529   3
  -2  -1   5-13.3657 35.5295   1
  -2   1   4 326.449 43.3302   2
  -2   1   4 398.740 46.7694   1
   2   1  -4 290.661 51.4081   2
   2  -1  -4 380.688 30.0276   4
   2   1  -4 275.018 33.7857   4
   2  -1  -4 296.009 47.6706   3
  -2  -1   4 340.526 33.3452   4
  -2  -1   4 205.574 46.8801   1
   2   1  -4 323.839 41.3611   3
  -2   1   4 424.265 32.2846   4
  -2   1   3 109.750 36.0873   2
   2  -1  -3 153.304 24.4824   4
   2   1  -3 89.3374 40.7416   2
  -2  -1   3 125.686 28.6829   4
  -2   1   3 153.428 26.0774   4
  -2   1   3 131.071 36.1504   1
   2  -1  -3 100.072 31.6610   3
   2   1  -3 148.102 34.9959   3
  -2  -1   3 136.718 41.8571   1
   2   1  -2 453.404 62.6933   2
  -2   1   2 475.949 52.9486   2
  -2  -1   2 463.409 39.6954   4
  -2   1   2 544.196 39.4711   4
  -2   1   2 520.074 50.7941   1
   2  -1  -2 467.041 35.7781   4
   2  -1  -2 496.144 46.6658   3
   2   1  -2 533.424 45.6184   3
  -2  -1   2 453.589 57.7130   1
  -2  -1   1 750.085 48.4733   4
  -2   1   1 891.546 48.9463   4
   2   1  -1 740.169 74.5498   2
  -2   1   1 824.692 61.9810   1
   2   1  -1 827.802 51.2631   3
   2  -1  -1 758.493 54.2500   3
  -2  -1   1 577.818 60.3563   1
  -2   1   1 768.093 62.4004   2
   2  -1   0 156.207 25.2108   3
  -2  -1   0 177.950 34.0881   4
   2   1   0 142.351 45.1490   2
  -2   1   0 223.835 33.3644   4
  -2  -1   0 120.171 39.3767   1
   2  -1   0 136.580 27.5261   3
  -2   1   0 150.194 37.6284   1
   2   1   0 174.135 30.3425   3
  -2  -1  -1 2344.24 105.261   1
   2  -1   1 2523.53 98.0487   2
  -2  -1  -1 2194.26 84.2715   4
  -2   1  -1 2349.05 83.3059   4
  -2  -1  -1 1909.53 78.1969   3
   2  -1   1 2420.31 79.3392   3
   2   1   1 2420.65 114.985   2
  -2   1  -1 2449.05 96.0964   1
   2   1   1 2420.11 75.8755   3
   2  -1   1 2477.08 72.7196   3
   2  -1   2 1123.11 68.7209   2
  -2  -1  -2 899.451 61.2941   4
   2   1   2 696.646 66.7950   2
  -2   1  -2 922.404 65.0621   1
   2   1   2 990.363 48.9009   3
  -2  -1  -2 927.668 72.3951   1
  -2   1  -2 947.655 59.0095   4
   2  -1   2 1017.33 45.4942   3
  -2  -1  -2 649.608 48.2795   3
  -2   1  -3 684.745 53.6296   4
  -2  -1  -3 643.204 61.3483   1
  -2  -1  -3 690.665 56.5105   4
   2  -1   3 662.572 36.3974   3
  -2  -1  -3 607.313 46.1992   3
   2  -1   3 811.475 59.4076   2
   2   1   3 641.993 38.1873   3
  -2   1  -3 729.251 62.0830   1
  -2   1  -3 663.400 36.4530   3
   2   1   3 697.501 69.0933   2
   2  -1   4 805.309 63.8899   2
  -2  -1  -4 635.154 61.6545   1
  -2   1  -4 698.708 55.9770   4
  -2  -1  -4 607.497 46.9727   3
   2   1   4 575.523 63.6466   2
   2   1   4 598.219 35.9636   3
   2  -1   4 673.652 35.2691   3
  -2   1  -4 645.609 59.1559   1
  -2  -1  -4 653.897 56.7740   4
  -2   1  -4 683.382 36.1689   3
  -2  -1  -5 773.897 67.5814   1
   2  -1   5 834.004 65.8900   2
  -2   1  -5 701.429 57.2861   4
   2   1   5 704.430 38.3484   3
  -2  -1  -5 785.275 63.8108   4
  -2  -1  -5 590.599 44.9560   3
   2  -1   5 695.717 34.6196   3
  -2   1  -5 814.872 63.8212   1
  -2   1  -5 708.665 34.8455   3
   2   1   5 745.773 72.8325   2
   2  -1   6 213.018 42.3618   2
   2  -1   6 176.833 20.0189   3
  -2   1  -6 160.899 41.0466   4
  -2  -1  -6 170.479 39.6743   4
  -2  -1  -6 121.262 26.1564   3
   2   1   6 163.234 23.7813   3
  -2   1  -6 150.228 18.8902   3
  -2   1  -6 129.555 38.8398   1
  -2  -1  -6 212.493 45.4358   1
   2   1   6 187.745 45.0710   2
  -2  -1  -7 158.441 27.2600   3
  -2  -1  -7 241.907 44.6775   4
   2  -1   7 244.706 22.3720   3
   2  -1   7 208.874 38.6101   2
   2   1   7 228.085 48.5722   2
  -2   1  -7 278.999 47.0957   1
  -2  -1  -7 132.957 40.3131   1
  -2   1  -7 181.861 40.3754   4
  -2   1  -7 214.200 21.3457   3
   2   1   7 175.578 23.0816   3
   2   1   8 153.366 23.3233   3
   2   1   8 228.115 49.1125   2
   2  -1   8 218.894 40.5106   2
  -2  -1  -8 150.347 43.1309   1
  -2   1  -8 107.701 34.5197   4
  -2  -1  -8 105.745 36.4935   4
  -2   1  -8 149.887 19.7692   3
  -2   1  -8 149.354 39.0630   1
   2  -1   8 137.009 18.4433   3
  -2  -1  -8 110.342 22.7497   3
   2   1   9 328.374 54.6313   2
   2  -1   9 304.980 41.8192   2
  -2  -1  -9 232.185 45.0125   4
   2  -1   9 228.136 21.6545   3
  -2  -1  -9 157.155 41.0757   1
  -2   1  -9 158.638 44.6999   1
  -2  -1  -9 160.412 26.8313   3
  -2   1  -9 234.945 22.5297   3
  -2   1  -9 199.825 45.3800   4
   2   1   9 219.425 26.4782   3
   2   1  10 54.6795 20.7258   3
  -2   1 -10 40.5196 36.6390   4
  -2  -1 -10 68.8076 35.9011   4
   2  -1  10 71.3609 30.4697   2
   2   1  10 16.9062 38.4277   2
  -2   1 -10 50.9926 15.9937   3
  -2  -1 -10 74.7337 35.8474   1
   2  -1  10 71.0803 17.2698   3
  -2  -1 -10 56.2632 22.8223   3
   2  -1  11 234.065 50.3342   1
   2   1  11 144.345 49.1007   2
  -2   1 -11 164.380 45.8275   4
  -2  -1 -11 269.637 53.8836   4
  -2   1 -11 236.136 26.3994   3
  -2  -1 -11 274.573 53.6666   1
  -2  -1 -11 204.209 27.7819   3
   2  -1  11 203.946 37.8563   2
   2   1  11 224.744 29.9672   3
   2  -1  11 182.044 23.8023   3
   2  -1  12 352.497 57.4171   1
   2   1  12 322.856 53.3911   2
  -2  -1 -12 337.412 52.5983   4
  -2   1 -12 371.765 51.3525   4
   2  -1  12 421.190 47.4360   2
  -2  -1 -12 339.993 53.5220   1
  -2   1 -12 392.841 32.2176   3
  -2  -1 -12 289.482 32.0154   3
  -2  -1 -12 432.573 40.0617   3
   2  -1  12 312.139 29.3776   3
   2  -1  13 364.413 46.2555   2
  -2  -1 -13 334.226 52.2760   1
   2  -1  13 424.257 61.0548   1
   2  -1  13 281.078 29.9630   3
  -2   1 -13 281.442 51.1272   4
  -2  -1 -13 346.847 39.9521   3
  -2   1 -13 386.148 35.4986   3
  -2  -1 -13 384.768 62.0970   4
   2   1  13 349.383 58.1182   2
  -2   1 -14 386.961 38.2803   3
  -2   1 -14 313.754 55.5164   4
   2   1  14 281.097 53.5873   2
  -2  -1 -14 262.476 54.4817   4
   2  -1  14 324.334 59.2668   1
   2  -1  14 210.829 28.1000   3
   2  -1  14 357.765 45.5891   2
  -2  -1 -14 323.940 41.1661   3
  -2  -1 -14 332.961 51.8241   1
  -2  -1 -15 828.112 72.9351   1
   2  -1  15 850.179 83.2010   1
   2   1  15 962.866 83.9421   2
  -2  -1 -15 858.211 82.3135   4
  -2   1 -15 799.850 77.6351   4
  -2   1 -15 1161.46 60.9959   3
  -2  -1 -15 1120.58 68.0233   3
   2  -1  15 957.030 66.8302   2
  -2  -1 -16 925.457 89.1621   4
   2  -1  16 913.303 67.6151   2
   2   1  16 770.063 78.5206   2
  -2  -1 -16 812.280 72.4003   1
  -2   1 -16 805.295 80.6741   4
  -2   1 -16 1044.30 60.9489   3
   2  -1  16 744.817 81.4096   1
  -2  -1 -16 781.018 60.0396   3
  -2  -1 -17 81.6321 38.4091   1
   2  -1  17 181.450 39.3622   2
  -2  -1 -17 80.9622 30.5137   3
   2  -1  17 140.797 47.6125   1
  -2  -1 -17 123.575 45.8962   4
   2   1  17 81.8194 41.1172   2
  -2   1 -17 152.534 45.5609   4
  -2   1 -17 137.742 35.0877   3
   2   1  18 218.857 48.0891   1
  -2  -1 -18 248.048 61.8893   4
   2   1  18 290.348 53.7208   2
   2  -1  18 264.569 41.5015   2
  -2  -1 -18 272.474 41.2202   3
  -2   1 -18 293.019 42.2005   3
  -2   1 -18 307.463 62.4497   4
   2  -1  18 343.848 62.7678   1
   2   1  19 203.162 52.9145   1
  -2  -1 -19 117.566 55.2293   4
   2   1  19 136.279 45.2767   2
   2  -1  19 32.0213 40.6411   1
  -2   1 -19 69.0518 41.0926   4
   2  -1  19 145.140 39.1163   2
  -2  -1 -19 137.284 38.8646   3
  -2   1 -19 136.415 35.5371   3
   2  -1  20 92.9730 45.0086   1
  -2  -1 -20 52.0168 30.3936   3
  -2   1 -20 86.2681 44.4969   4
   2  -1  20 21.9938 33.0753   2
   2   1  20 51.7168 38.0416   1
  -2   1 -20 169.854 38.9394   3
   2   1  20 135.422 51.2370   2
  -2  -1 -20 10.1479 39.5607   4
  -2  -1 -21 82.7169 32.3883   3
   2  -1  21 93.8981 44.6586   1
  -2   1 -21 29.8914 38.7414   4
   2   1  21 85.3104 46.6332   2
   2   1  21 50.1160 36.4947   1
   2  -1  21 76.6856 36.9871   2
  -2  -1 -21 102.841 49.5052   4
  -2   1 -21 112.946 36.4127   3
   2   1  22 396.227 63.0788   1
   2  -1  22 369.891 68.5846   1
  -2   1 -22 441.736 72.3473   4
  -2  -1 -22 489.015 75.0852   4
   2   1  22 425.213 67.5934   2
  -2  -1 -22 419.467 53.6975   3
  -2   1 -22 611.740 59.9277   3
   2  -1  22 464.922 58.4762   2
   2   1  23 384.877 62.8827   1
  -2  -1 -23 456.484 56.7164   3
  -2  -1 -23 431.903 72.6206   4
  -2   1 -23 575.765 79.7834   4
   2   1  23 405.690 65.6904   2
   2  -1  23 486.779 61.1075   2
   2  -1  23 498.099 76.1731   1
  -2   1 -23 472.963 55.2826   3
   2   1  24 568.290 76.2104   1
   2  -1  24 647.481 86.9771   1
   2   1  24 590.144 79.3206   2
  -2  -1 -24 503.989 59.3886   3
  -2  -1 -24 526.378 79.3690   4
   2  -1  24 629.403 68.4224   2
  -2   1 -24 508.165 74.7427   4
  -2   1 -24 666.226 65.2705   3
   2   1  25 49.6017 44.6552   2
   2   1  25-2.81647 36.9315   1
  -2  -1 -25-1.33553 51.0394   4
  -2   1 -25 11.8845 42.6594   4
   2  -1  25 9.11183 47.8951   1
   2  -1  25 18.6564 38.1280   2
  -2  -1 -25-41.4406 33.1919   3
  -2   1 -25 86.3998 38.4132   3
   2   1  26 15.1295 41.2890   1
  -2  -1 -26 34.3192 45.5707   4
  -2   1 -26-53.4329 43.4214   4
   2  -1  26 1.99269 44.6540   1
   2  -1  26 33.7998 39.5227   2
  -2  -1 -26 34.3242 34.4498   3
  -2   1 -26 22.3243 35.7797   3
   2   1  26 51.5423 46.1037   2
   2  -1  27 433.548 66.9251   2
   2  -1  27 303.566 68.1090   1
  -2  -1 -27 408.171 76.5260   4
   2   1  27 256.723 59.3733   1
  -2  -1 -27 407.163 59.4316   3
  -2   1 -27 565.854 65.1288   3
   2   1  27 433.055 76.5793   2
  -2   1 -27 408.300 75.6472   4
  -2   1 -28 2498.59 161.256   4
  -2  -1 -28 2494.97 163.224   4
   2   1  28 2611.41 162.063   2
   2  -1  28 2515.81 137.461   2
  -2  -1 -28 2478.42 131.652   3
   2  -1  28 2377.72 162.641   1
   2   1  28 2229.44 147.357   1
  -2   1 -28 2542.44 128.468   3
   2  -1  29 1153.00 120.875   1
   2   1  29 1060.02 107.087   1
  -2  -1 -29 1386.04 127.229   4
   2  -1  29 1232.34 103.708   2
   2   1  29 1364.70 123.141   2
  -2   1 -29 1207.50 119.748   4
  -2  -1 -29 1364.32 102.328   3
  -2   1 -29 1445.07 100.338   3
   2  -1  30 139.555 66.6002   1
  -2   1 -30 98.4367 57.2703   4
  -2  -1 -30 81.1891 53.5296   4
   2   1  30 93.5275 56.2679   1
   2   1  30 119.899 61.0249   2
   2  -1  30 26.4524 41.5397   2
  -2  -1 -30 91.4896 46.2215   3
  -2   1 -30 65.7446 44.6555   3
  -2  -1 -31-3.16244 48.9614   4
   2   1  31 138.441 65.2009   2
   2  -1  31 110.013 61.9388   1
   2  -1  31 126.513 55.4675   2
  -2  -1 -31 60.9638 43.4018   3
  -2   1 -31 58.5257 59.6376   4
   2   1  31 14.7941 46.0358   1
  -2   1 -31 51.2019 47.5190   3
  -2  -1 -32 179.430 70.6147   4
  -2   1 -32 22.2513 52.2456   4
   2  -1  32-30.1439 56.2537   1
   2   1  32 130.592 60.4108   2
   2  -1  32 53.1858 44.9246   2
  -2  -1 -32 28.8360 40.7382   3
   2   1  32 60.8116 47.7898   1
  -2   1 -32 64.7858 44.8011   3
   2   1  33 646.888 93.1553   1
   2  -1  33 880.372 94.7925   2
  -2   1 -33 874.688 109.851   4
  -2  -1 -33 930.196 118.111   4
  -2   1 -33 999.396 93.8572   3
   2   1  33 851.599 112.929   2
   2  -1  33 812.701 112.859   1
  -2  -1 -33 802.264 92.3164   3
  -2   1 -34 4124.87 223.532   4
   2   1  34 3897.91 209.593   1
   2   1  34 3863.01 218.530   2
   2  -1  34 3694.45 221.126   1
   2  -1  34 4003.04 194.502   2
  -2  -1 -34 3659.13 178.344   3
  -2  -1 -34 4367.50 233.524   4
  -2   1 -34 3862.46 176.010   3
  -2   1 -35 979.130 99.5724   3
   2   1  35 957.328 115.464   1
  -2  -1 -35 1134.66 130.149   4
   2  -1  35 1040.17 130.483   1
   2  -1  35 1205.43 118.235   2
  -2  -1 -35 846.694 96.8605   3
  -2   1 -35 1096.93 125.626   4
   2   1  35 1135.27 127.781   2
  -2  -1 -36 855.072 114.956   4
   2   1  36 619.133 98.1880   1
   2  -1  36 640.128 108.035   1
   2  -1  36 812.171 100.170   2
  -2   1 -36 758.480 89.2344   3
  -2   1 -36 936.984 118.319   4
   2   1  36 802.874 114.038   2
  -2  -1 -36 678.290 87.2876   3
   2  -1  37 43.8882 53.8867   2
  -2  -1 -37 68.9980 55.4923   4
  -2   1 -37 116.189 66.6678   4
   2   1  37 45.3907 56.0678   1
   2  -1  37 26.9312 60.1842   1
   2   1  37 4.82357 60.6203   2
  -2  -1 -37 144.126 61.4803   3
  -2   1 -37 115.933 50.7977   3
   2   1  38 521.710 106.882   2
  -2  -1 -38 374.903 89.0646   4
  -2   1 -38 587.452 102.736   4
   2   1  38 432.710 85.3491   1
   2  -1  38 427.340 95.7173   1
  -2  -1 -38 358.625 74.2378   3
   2  -1  38 398.491 79.0975   2
  -2   1 -38 371.103 72.6741   3
   2  -1  39 69.6045 63.7847   1
   2   1  39-0.39323 65.6641   2
  -2  -1 -39 193.791 77.9544   4
  -2   1 -39 151.694 70.7009   4
  -2  -1 -39 184.057 64.2033   3
   2  -1  39 63.4401 57.2093   2
  -2   1 -39 27.9351 48.2061   3
   2   1  39 178.991 72.9525   1
   2  -1  40 460.383 90.7463   2
  -2  -1 -40 414.485 93.0334   4
  -2   1 -40 489.197 101.795   4
  -2   1 -40 422.000 79.5207   3
   2   1  40 378.174 91.6464   2
  -2  -1 -40 289.419 73.1995   3
   2  -1  40 449.730 104.292   1
   2   1  40 428.979 100.361   1
  -2  -1 -41 181.806 79.7127   4
   2  -1  41-24.0342 65.4120   1
  -2   1 -41-56.7264 63.5623   4
   2   1  41 30.6583 60.1704   1
   2   1  41 45.8600 70.9698   2
  -2  -1 -41-38.2785 53.4900   3
   2  -1  41 7.33565 53.2847   2
  -2   1 -41 93.0176 62.9924   3
  -2  -1 -42 88.4959 70.1522   4
  -2   1 -42 74.4299 66.3015   4
   2   1  42-85.4965 61.5064   1
   2  -1  42 69.1764 76.8764   1
   2   1  42 82.4324 75.3368   2
  -2  -1 -42 146.623 54.7942   3
   2  -1  42 99.1696 62.3240   2
   2   1  43 80.7088 73.9137   1
  -2  -1 -43-31.5507 69.7903   4
  -2   1 -43 23.2724 65.4049   4
   2  -1  43 15.9908 71.6491   1
   2   1  43-25.4504 70.4781   2
   2  -1  43 121.695 71.6596   2
  -2   1 -44 21.1261 59.7561   4
  -2  -1 -44 113.940 74.7924   4
   2   1  44 214.772 87.7506   1
   2  -1  44 79.0668 85.8928   1
   2   1  44 225.313 89.8363   2
   2  -1  44 159.228 74.2706   2
   2  -1  45 143.293 75.9579   2
  -2  -1 -45 244.194 83.3122   4
  -2   1 -45-9.91068 63.9145   4
   2  -1  45 18.4373 75.0285   1
   2   1  45 24.5703 76.6304   2
   2   1  45-47.8583 71.2799   1
  -2  -1 -46 166.402 80.4022   4
  -2   1 -46 315.725 93.6083   4
   2  -1  46 266.393 106.931   1
   2   1  46 64.3701 81.4431   1
   2   1  46 143.098 79.3245   2
  -2  -1 -47 260.491 97.4751   4
   2   1  47 49.6717 70.8364   1
  -2   1 -47 86.5964 82.5102   4
   2  -1  47 143.295 91.3280   1
   2   1  47 159.633 91.5065   2
  -2  -1 -48 172.039 93.1193   4
  -2   1 -48 199.418 97.9659   4
   2   1  48 28.1217 80.4678   1
   2   1  48 113.766 85.8685   2
  -2  -1 -49 232.126 92.5733   4
   2   1  49 66.6109 82.0392   1
  -2   1 -49 147.679 80.6548   4
   2  -1  49 221.917 103.480   1
   2   1  49 210.536 90.5462   2
  -2   1 -50 452.945 113.871   4
  -2  -1 -50 291.008 105.588   4
   2   1  50 387.262 107.513   1
   2  -1  50 333.739 107.222   1
   2   1  50 566.797 135.364   2
  -2   1 -51-76.1774 78.7477   4
   2   1  51 99.8988 83.9711   1
   2  -1  51 150.610 93.4899   1
   2   1  51 215.835 101.406   2
  -2  -1 -51 258.902 100.078   4
  -2  -1 -52 67.2736 90.1066   4
   2   1  52 180.786 96.5190   1
  -2   1 -52 190.498 87.2847   4
   2  -1  52 241.607 107.531   1
   2   1  52 213.412 97.7446   2
   2   1  53 306.311 112.672   2
   2  -1  53 412.589 123.550   1
  -2  -1 -53 245.384 94.3006   4
  -2   1 -53 242.287 106.731   4
   2   1  53-19.9796 80.3347   1
  -2  -1 -54 307.738 110.732   4
  -2   1 -54 543.302 131.887   4
   2   1  54 315.244 116.320   1
   2  -1  54 548.082 134.934   1
   2   1  54 546.056 131.519   2
  -2   1 -55 51.3999 82.3632   4
  -2  -1 -55-45.6514 81.3119   4
   2  -1  55 12.9162 92.1529   1
   2   1  55 89.3423 92.6443   2
  -2  -1 -56 59.2380 81.1891   4
   2  -1  56 40.8157 101.938   1
   2   1  56-78.7492 85.5699   2
   2   1  57-22.6122 92.2789   2
  -2  -2  55 197.184 102.570   1
   2  -2 -54 171.242 109.269   3
  -2  -2  54 19.8200 78.6495   1
   2   2 -54 18.2356 86.2533   3
  -2   2  54-37.5331 94.5803   2
   2  -2 -53 91.3865 95.8987   3
  -2  -2  53 116.841 82.9604   1
   2   2 -53-21.5170 82.0394   3
  -2   2  53 97.9049 104.768   2
  -2  -2  52 54.4183 79.8984   1
   2  -2 -52 193.303 99.9818   3
   2   2 -52 176.652 96.7995   3
  -2   2  52 145.392 101.789   2
  -2  -2  51 148.954 95.5784   1
   2  -2 -51 143.293 92.5597   3
   2   2 -51 1.35088 78.0174   3
  -2   2  51-79.5376 92.3817   2
  -2  -2  50-17.6755 74.0816   1
   2  -2 -50 164.702 112.512   3
   2   2 -50 116.179 81.2043   3
  -2   2  50 135.427 106.902   2
  -2  -2  49 28.6681 76.8608   2
   2  -2 -49-64.0923 83.6282   3
   2   2 -49 23.2773 80.7130   3
  -2  -2  49-153.359 89.1638   1
  -2   2  49 172.897 94.6440   2
  -2  -2  48-72.5386 75.3660   2
  -2  -2  48 11.5740 69.0864   1
   2  -2 -48 223.909 95.3740   3
   2   2 -48-66.4968 81.9589   3
  -2   2  48 2.01708 91.3946   2
  -2  -2  47-55.8525 69.6620   2
   2  -2 -47-105.287 82.2826   3
  -2  -2  47-48.9596 82.5473   1
   2   2 -47-6.02218 70.9759   3
  -2   2  47-41.2241 80.6464   2
  -2  -2  46-23.0026 67.6779   2
  -2  -2  46-5.13872 65.0746   1
   2  -2 -46 173.949 95.6492   3
   2   2 -46 42.8544 71.8248   3
  -2   2  46 95.8618 77.1786   2
  -2  -2  45-56.9416 66.3319   2
  -2  -2  45 39.6433 65.3508   1
   2  -2 -45 34.4712 71.0406   3
   2   2 -45 59.1632 69.3361   3
  -2   2  45 143.896 93.4844   2
  -2  -2  44-80.1484 63.1917   2
   2  -2 -44 23.5353 75.9629   3
  -2  -2  44 115.129 82.4984   1
   2   2 -44 32.2409 76.7937   3
  -2   2  44 20.3530 71.2064   2
  -2  -2  43 38.8275 60.8846   2
  -2  -2  43-113.025 71.4259   1
   2  -2 -43 73.7897 82.4431   3
   2   2 -43-81.7262 74.7105   3
  -2   2  43-10.4230 71.6668   2
  -2  -2  42 70.2600 62.7436   2
  -2  -2  42 54.7370 70.0962   1
   2  -2 -42 143.545 80.1016   3
  -2   2  42-99.9172 79.6374   2
   2   2 -42 25.4935 64.5735   3
  -2  -2  41 115.705 69.4258   2
  -2  -2  41 2.26350 72.3851   1
   2   2 -41 55.7759 68.5918   3
   2  -2 -41-127.422 71.3186   3
  -2   2  41-117.698 85.5156   2
  -2  -2  40 9.26448 59.4199   2
   2  -2 -40 70.2467 79.5021   3
  -2  -2  40 1.13910 64.1223   1
   2   2 -40 83.1010 69.1858   3
  -2   2  40 124.859 67.6945   2
  -2  -2  39 161.125 70.1249   2
  -2  -2  39 25.6630 54.7840   1
   2   2 -39 71.0889 64.5130   3
   2  -2 -39 77.6286 74.6986   3
  -2   2  39-60.5533 77.5241   2
  -2  -2  38 42.2210 57.1814   2
   2  -2 -38-29.6041 62.9524   3
  -2  -2  38 30.1147 60.7589   1
  -2   2  38 47.6815 42.8597   1
   2   2 -38 40.0484 40.8325   4
   2   2 -38 42.6139 63.2045   3
  -2   2  38 75.9511 63.2510   2
  -2  -2  37 146.015 65.2840   2
   2   2 -37 225.032 77.1905   3
  -2  -2  37 182.622 74.7150   1
   2   2 -37 142.342 44.1639   4
   2  -2 -37 134.372 71.4677   3
  -2   2  37 137.453 52.9111   1
  -2   2  37 295.186 86.7127   2
  -2  -2  36 338.440 81.7777   2
  -2  -2  36 329.949 83.5703   1
   2   2 -36 213.052 53.6248   4
  -2   2  36 248.218 60.0438   1
   2  -2 -36 173.371 70.0510   3
   2   2 -36 260.577 84.6206   3
  -2   2  36 386.281 90.7123   2
   2  -2 -35 743.664 121.531   3
   2  -2 -35 689.626 77.3185   4
  -2  -2  35 677.398 108.272   1
  -2   2  35 608.860 77.4936   1
   2   2 -35 737.277 116.970   3
  -2   2  35 630.101 110.417   2
  -2  -2  35 783.124 103.484   2
   2   2 -35 611.759 73.6644   4
  -2  -2  34 1915.00 159.044   1
   2  -2 -34 1689.64 162.377   3
   2   2 -34 1831.85 115.586   4
  -2   2  34 2149.55 174.748   2
   2   2 -34 2167.78 174.096   3
   2  -2 -34 2152.77 121.184   4
  -2   2  34 1731.56 118.557   1
  -2  -2  34 2218.47 158.015   2
  -2  -2  33 356.495 85.0505   1
  -2   2  33 320.759 56.8405   1
   2  -2 -33 355.373 56.8068   4
   2   2 -33 348.018 59.3877   4
  -2  -2  33 410.011 77.6679   2
   2  -2 -33 377.140 87.6360   3
   2   2 -33 450.944 89.1842   3
  -2   2  33 395.630 87.5365   2
  -2  -2  32 107.795 61.2476   1
   2  -2 -32 110.533 71.2904   3
   2  -2 -32 41.6899 36.3883   4
  -2  -2  32 43.8715 46.4537   2
   2   2 -32 96.0260 39.3980   4
  -2   2  32 52.0477 63.8159   2
  -2   2  32 116.081 44.7450   1
   2   2 -32 146.759 65.5294   3
   2  -2 -31 584.778 97.0033   3
   2   2 -31 559.530 94.0247   3
   2  -2 -31 631.106 67.6956   4
   2   2 -31 658.131 68.9978   4
  -2   2  31 798.767 110.695   2
  -2  -2  31 627.655 95.3785   1
  -2   2  31 717.867 76.8430   1
  -2  -2  31 704.927 91.8150   2
  -2   2  30 1255.60 94.2137   1
   2  -2 -30 1222.47 128.089   3
   2  -2 -30 1315.70 88.9548   4
  -2  -2  30 1184.28 120.720   1
   2   2 -30 1405.57 94.1505   4
  -2   2  30 1197.59 125.380   2
   2   2 -30 1063.95 121.219   3
  -2  -2  30 1320.74 115.316   2
  -2  -2  29 271.860 63.7005   2
  -2  -2  29 313.602 75.5025   1
   2   2 -29 215.124 41.2527   4
   2  -2 -29 181.893 67.4776   3
  -2   2  29 317.641 74.9996   2
  -2   2  29 192.861 46.5953   1
   2  -2 -29 181.318 43.8741   4
   2   2 -29 206.187 66.1487   3
  -2   2  28 2146.14 160.226   2
   2  -2 -28 1970.18 102.575   4
  -2  -2  28 1815.58 142.293   1
   2   2 -28 2079.37 108.926   4
  -2   2  28 2160.86 114.665   1
   2  -2 -28 1519.90 137.417   3
   2   2 -28 2062.83 151.757   3
  -2  -2  28 2169.40 139.168   2
  -2  -2  27 155.994 54.8497   2
  -2  -2  27 58.7046 43.2803   1
   2  -2 -27 114.043 34.7792   4
  -2   2  27 134.308 38.9037   1
   2   2 -27 103.907 36.4808   4
  -2   2  27 123.979 52.4020   2
   2  -2 -27 122.558 68.5192   3
   2   2 -27 139.316 57.8697   3
  -2  -2  26 236.939 62.4291   1
   2  -2 -26 281.976 43.8348   4
   2  -2 -26 355.132 83.6903   3
  -2   2  26 209.269 44.2406   1
   2   2 -26 228.536 44.4668   4
  -2  -2  26 438.561 72.8958   2
   2   2 -26 242.776 66.5347   3
  -2   2  26 214.985 54.1516   2
   2  -2 -25 535.098 53.8648   4
  -2  -2  25 460.481 77.0737   1
   2   2 -25 497.622 55.6710   4
  -2   2  25 596.754 61.6713   1
   2  -2 -25 306.216 74.3479   3
  -2  -2  25 577.384 75.3383   2
   2   2 -25 402.474 74.7864   3
  -2   2  25 409.414 75.1441   2
   2  -2 -24 516.163 88.8378   3
   2  -2 -24 562.161 54.4413   4
  -2   2  24 624.704 62.1758   1
  -2  -2  24 520.752 72.6657   1
  -2  -2  24 565.724 74.5682   2
   2   2 -24 363.184 70.9296   3
   2   2 -24 466.627 53.2405   4
  -2   2  24 433.439 78.6977   2
  -2  -2  23 226.924 56.5091   2
  -2  -2  23 54.9647 42.0425   1
   2  -2 -23 145.443 35.4724   4
  -2   2  23 159.625 37.6625   1
   2   2 -23 120.330 34.2020   4
   2   2 -23 150.887 56.8446   3
   2  -2 -23 192.893 65.7759   3
  -2   2  23 154.242 50.8605   2
   2  -2 -22 629.307 88.7394   3
   2   2 -22 540.170 52.6727   4
  -2  -2  22 615.003 81.3165   1
  -2   2  22 592.055 83.1978   2
  -2   2  22 692.933 62.3259   1
   2   2 -22 686.853 84.3072   3
  -2  -2  22 657.105 74.6453   2
   2  -2 -22 635.820 55.1904   4
   2  -2 -21 1139.23 67.1813   4
   2   2 -21 1127.36 72.5209   4
  -2  -2  21 948.609 95.6816   1
   2  -2 -21 802.484 97.6828   3
  -2   2  21 995.513 71.8497   1
  -2   2  21 1106.09 103.456   2
  -2  -2  21 1051.73 88.8318   2
   2   2 -21 980.268 99.4362   3
  -2  -2  20 465.313 70.2655   1
   2  -2 -20 462.594 79.1154   3
  -2  -2  20 527.063 67.7122   2
   2   2 -20 453.309 71.4002   3
   2  -2 -20 458.636 45.9835   4
   2   2 -20 469.512 48.7750   4
  -2   2  20 546.405 55.0986   1
  -2   2  20 406.947 64.4835   2
  -2  -2  19 148.326 48.5551   2
  -2  -2  19 138.889 49.0149   1
   2  -2 -19 105.086 28.0890   4
  -2   2  19 66.7818 29.9549   1
   2   2 -19 92.0040 31.7000   4
   2  -2 -19 73.5967 47.5762   3
   2   2 -19 42.8265 39.6103   3
  -2   2  19 118.880 54.3419   2
  -2  -2  18 228.627 45.0996   2
   2  -2 -18 202.826 32.6382   4
  -2   2  18 274.311 40.8420   1
   2  -2 -18 246.282 61.0520   3
  -2  -2  18 139.462 50.9767   1
   2   2 -18 264.333 56.7071   3
  -2   2  18 182.028 54.8814   2
   2  -2 -17 717.164 87.3282   3
  -2  -2  17 749.078 63.2046   4
  -2   2  17 773.953 58.0809   1
  -2  -2  17 678.561 80.3813   1
  -2   2  17 647.207 78.2319   2
   2  -2 -17 750.727 53.0736   4
  -2  -2  17 809.369 76.1465   2
   2   2 -17 829.631 85.2301   3
  -2  -2  16 1142.34 76.4175   4
   2  -2 -16 1020.87 57.8194   4
  -2  -2  16 859.372 85.7011   1
   2   2 -16 957.157 88.9505   3
   2  -2 -16 982.947 98.1339   3
  -2   2  16 1205.64 71.0554   1
  -2  -2  16 1030.74 84.9658   2
  -2   2  16 1126.72 96.7126   2
  -2  -2  15 89.7557 40.8766   2
   2  -2 -15 85.9290 46.0665   3
  -2   2  15 110.484 45.7352   2
  -2  -2  15 72.8873 40.0244   1
  -2  -2  15 78.6382 30.7505   4
   2  -2 -15 105.252 28.3397   4
   2   2 -15 51.7540 38.4935   3
  -2   2  15 82.5443 28.7352   1
  -2  -2  14 51.6663 40.0375   1
   2  -2 -14 37.0632 22.5150   4
   2  -2 -14-1.95915 44.9333   3
  -2  -2  14 46.2056 30.2296   4
  -2   2  14 64.0933 27.9479   1
   2   2 -14 25.0657 38.5595   3
  -2   2  14 26.7717 37.3340   2
   2   2 -13 392.111 56.4141   2
  -2  -2  13 431.904 49.4166   4
   2  -2 -13 468.397 40.9314   4
  -2  -2  13 409.389 58.5226   1
   2   2 -13 393.778 61.2424   3
  -2   2  13 463.649 64.0378   2
   2  -2 -13 358.217 64.1225   3
  -2   2  13 466.420 44.8579   1
  -2   2  12 492.258 46.7040   1
   2  -2 -12 550.074 43.6358   4
   2   2 -12 442.022 59.9612   2
  -2   2  12 459.754 65.6778   2
   2   2 -12 571.300 66.4990   3
  -2  -2  12 518.865 53.9387   4
  -2  -2  12 473.788 64.0097   1
   2  -2 -12 444.664 67.0282   3
  -2   2  11 1262.28 66.4184   1
   2   2 -11 1192.73 87.6807   2
   2  -2 -11 1189.20 59.3298   4
  -2  -2  11 1153.44 72.3891   4
  -2  -2  11 1113.70 88.2617   1
   2   2 -11 1301.62 91.4828   3
   2  -2 -11 1020.52 93.7133   3
  -2   2  11 1240.12 91.3538   2
   2  -2 -10-17.5506 48.5913   3
   2   2 -10-11.9566 37.7210   2
   2  -2 -10 26.9187 20.6331   4
  -2  -2  10-7.04699 27.3654   4
  -2  -2  10-2.83006 36.3542   1
   2   2 -10-48.0485 38.2862   3
  -2   2  10 22.4167 25.3943   1
  -2   2  10-13.8613 32.6411   2
  -2  -2   9 658.597 70.5303   1
   2  -2  -9 695.321 48.6106   4
   2  -2  -9 520.634 65.8280   3
   2   2  -9 512.687 66.0951   2
  -2   2   9 799.537 54.2217   1
  -2   2   9 678.771 66.3856   2
   2   2  -9 582.555 61.3662   3
  -2  -2   9 673.913 56.4447   4
   2   2  -8 596.584 72.1202   2
   2  -2  -8 696.081 49.5608   4
  -2  -2   8 715.275 59.4212   4
  -2   2   8 766.399 52.4020   1
   2  -2  -8 637.445 70.6401   3
  -2   2   8 830.803 71.6190   2
   2   2  -8 842.850 72.3467   3
  -2  -2   8 736.326 75.5246   1
   2   2  -7 1114.00 95.0397   2
   2  -2  -7 1486.27 69.8554   4
  -2  -2   7 1393.66 76.4470   4
   2  -2  -7 1106.51 93.0635   3
  -2  -2   7 1572.52 99.3145   1
  -2   2   7 1403.06 88.8074   2
   2   2  -7 1535.27 89.9648   3
  -2   2   7 1467.76 69.4614   1
   2  -2  -6 280.327 39.0882   4
  -2   2   6 306.169 49.7783   2
  -2   2   6 319.471 40.0358   1
  -2  -2   6 281.114 53.5511   1
   2   2  -6 334.013 49.8254   3
   2   2  -6 253.901 52.2030   2
  -2  -2   6 287.502 41.9805   4
   2   2  -5 295.365 56.0972   2
   2   2  -5 383.655 53.5486   3
   2  -2  -5 443.771 45.2180   4
  -2   2   5 506.492 45.3085   1
  -2  -2   5 367.632 59.3652   1
  -2   2   5 463.542 54.5116   2
  -2  -2   5 429.168 48.9767   4
  -2   2   5 475.254 55.3112   3
   2   2  -4 520.816 68.1008   2
  -2  -2   4 449.091 50.0637   4
  -2   2   4 496.316 44.8598   1
  -2   2   4 457.360 53.3607   2
  -2  -2   4 506.153 61.1429   1
   2   2  -4 492.306 53.7379   3
  -2   2   4 473.119 53.1518   3
   2   2  -3 1670.72 105.829   2
  -2  -2   3 1684.82 86.1402   4
  -2   2   3 1930.20 82.3631   4
  -2   2   3 1811.39 89.5689   2
   2   2  -3 1834.19 91.3256   3
  -2  -2   3 1817.48 100.067   1
  -2   2   3 1906.75 80.3560   1
  -2   2   3 1837.44 90.3111   3
  -2  -2   2 402.656 54.1789   4
   2   2  -2 460.712 64.5640   2
  -2   2   2 395.927 43.0471   4
  -2   2   2 432.460 48.2363   3
   2   2  -2 420.957 50.6916   3
  -2  -2   2 451.641 60.7508   1
  -2   2   2 457.779 43.6771   1
  -2   2   2 418.980 48.0193   2
  -2   2   1 322.778 40.7996   1
  -2  -2   1 202.457 39.6750   4
   2   2  -1 272.779 56.2406   2
  -2   2   1 242.729 39.4743   4
  -2   2   1 315.571 43.3492   2
   2   2  -1 291.324 43.7811   3
  -2  -2   1 326.258 50.7432   1
  -2   2   1 344.662 47.9130   3
  -2  -2   0 32.0604 38.4918   1
  -2   2   0 59.3189 31.9334   2
  -2   2   0 52.2446 28.9704   3
  -2   2   0 21.6048 27.7453   4
  -2  -2   0 52.7484 32.7283   4
   2   2   0 87.6390 41.0209   2
  -2   2   0 56.5088 29.3049   1
   2   2   0 22.0005 28.5005   3
  -2   2  -1 186.389 33.5410   3
  -2   2  -1 105.254 32.2935   2
  -2  -2  -1 122.967 38.5614   1
  -2  -2  -1 129.356 36.4560   4
  -2   2  -1 150.109 36.4473   1
   2   2   1 114.036 33.5011   3
   2   2   1 64.0284 38.6062   2
  -2   2  -1 96.8358 32.4347   4
  -2   2  -2-30.8673 28.1481   3
  -2   2  -2 23.9188 29.7530   2
  -2   2  -2 22.8272 29.2825   4
  -2  -2  -2-2.43748 33.5052   1
  -2   2  -2-28.4750 31.6514   1
  -2  -2  -2 20.4117 30.7884   4
   2   2   2 7.89007 41.1458   2
   2   2   2 15.1835 28.4061   3
  -2  -2  -3 267.065 46.5904   1
  -2   2  -3 280.597 44.5104   1
   2  -2   3 182.385 31.6631   2
   2   2   3 208.093 50.0860   2
  -2  -2  -3 190.000 43.1475   4
  -2   2  -3 209.510 36.0045   3
  -2   2  -3 233.450 43.7641   4
   2   2   3 216.623 35.9873   3
  -2  -2  -4 337.402 51.4509   1
   2   2   4 391.320 59.0474   2
  -2   2  -4 372.757 49.8254   4
   2  -2   4 433.135 43.3728   2
  -2  -2  -4 301.520 47.9118   4
   2   2   4 292.660 40.2224   3
  -2   2  -4 409.585 43.3244   3
  -2   2  -5 52.3145 29.3773   3
   2  -2   5 55.1940 33.8753   1
   2  -2   5 23.0937 22.9090   2
   2   2   5 82.8741 47.1357   2
  -2   2  -5 57.7175 32.6677   4
  -2  -2  -5 51.5546 34.2061   1
  -2  -2  -5 85.3745 41.2989   4
   2   2   5 71.7135 31.9229   3
   2   2   6 370.032 60.6793   2
   2  -2   6 465.304 56.3846   1
  -2  -2  -6 372.549 51.1413   1
  -2   2  -6 409.244 53.3203   4
   2  -2   6 391.126 41.5824   2
   2   2   6 321.716 39.7613   3
  -2   2  -6 465.687 44.8586   3
  -2  -2  -6 386.972 56.7146   4
  -2   2  -7 452.490 53.1760   4
   2   2   7 392.062 55.9561   2
  -2  -2  -7 375.952 53.2728   1
   2  -2   7 400.842 41.5441   2
  -2  -2  -7 372.602 55.0546   4
  -2   2  -7 451.468 42.3578   3
[truncated: 625,977 more chars]
